# Supplementary material for: Proteomic Profiles in Acute Respiratory Distress Syndrome Differentiates Survivors from Non-Survivors
Source: PLoS One. 2014 Oct 7;9(10):e109713. doi: 10.1371/journal.pone.0109713 (PMC4188744; doi:10.1371/journal.pone.0109713)
Supplement: Table S1 — BALF proteins identified using iTRAQ MS/MS. (XLSX) [file pone.0109713.s001.xlsx]

## Sheet: Index
Tab on this Worksheet	Description
Protein Pilot PSPEP FDR Summary	Protein Pilot Summary for FDR and corrosponding confidence for peptide and protein ID
Proteins identified at 1% FDR	792 Proteins identified with Protein Pilot Database search at 1% False Discovery Rate
High Abundance-Contaminants	High abundance and contaminant or misidentified protiens (present in the list of proteins identified at 1% FDR)
BALF Proteome	List of 733 proteins identifeid after manual removal of high abundance and contaminant or misidentified proteins
BALF with quantitation (with q-values)	506 proeitns that had peptide data to quantify the relative abundance

## Sheet: Protein PIlot PSPEP Summary
	Single Table Summary of All Results
	Data Level	FDR Type	FDR	ID Yield			Template Version
Identification Yield at FDR Threshold	Protein	Local	0.01	649
	Protein		0.05	757			1.03
	Protein		0.1	777
	Protein	Global	0.01	792
	Protein		0.05	910
	Protein		0.1	987
	Distinct peptide	Local	0.01	7461
	Distinct peptide		0.05	9791
	Distinct peptide		0.1	11201
	Distinct peptide	Global	0.01	10355
	Distinct peptide		0.05	13971
	Distinct peptide		0.1	15035
	Spectral	Local	0.01	14753
	Spectral		0.05	19537
	Spectral		0.1	22477
	Spectral	Global	0.01	20601
	Spectral		0.05	26841
	Spectral		0.1	28333
Corresponding Confidence in ProteinPilot™ Software	Protein	Local	0.01	0.990667
	Protein		0.05	0.99
	Protein		0.1	0.983404
	Protein	Global	0.01	0.974881
	Protein		0.05	0.57342
	Protein		0.1	0.369043
	Distinct peptide	Local	0.01	0.9923
	Distinct peptide		0.05	0.8812
	Distinct peptide		0.1	0.628
	Distinct peptide	Global	0.01	0.7928
	Distinct peptide		0.05	0.1331
	Distinct peptide		0.1	0
	Spectral	Local	0.01	0.9865
	Spectral		0.05	0.7559
	Spectral		0.1	0.454
	Spectral	Global	0.01	0.6555
	Spectral		0.05	0
	Spectral		0.1	0

## Sheet: Proteins Identified @ 1% FDR
N	Unused	Total	%Cov	%Cov(50)	%Cov(95)	Accession	Name	Species	Peptides (95%)	115:114	PVal 115:114	EF 115:114	LowerCI 115:114	UpperCI 115:114	116:114	PVal 116:114	EF 116:114	LowerCI 116:114	UpperCI 116:114
1	294.84	294.84	93.6	91.95	91.13	sp|P02768|ALBU_HUMAN	Serum albumin OS=Homo sapiens GN=ALB PE=1 SV=2	HUMAN	762	0.0981904	1.20599e-08	2.02972	0.0483763	0.199299	0.526967	0.00240987	1.49989	0.351337	0.790392
2	173.58	173.58	85.41	79.43	74.16	sp|P01009|A1AT_HUMAN	Alpha-1-antitrypsin OS=Homo sapiens GN=SERPINA1 PE=1 SV=3	HUMAN	169	0.343888	8.72343e-07	1.42733	0.240931	0.490844	0.27604	9.50304e-11	1.31647	0.209682	0.363398
3	171.21	171.57	53.24	47.87	41.86	tr|B4E1Z4|B4E1Z4_HUMAN	Complement factor B OS=Homo sapiens GN=CFB PE=2 SV=1	HUMAN	120	1.0198	0.736124	1.12424	0.907104	1.14651	0.943722	0.359249	1.13484	0.83159	1.07097
4	170.25	170.3	84.38	72.77	63.39	tr|G3V5I3|G3V5I3_HUMAN	Alpha-1-antichymotrypsin OS=Homo sapiens GN=SERPINA3 PE=3 SV=1	HUMAN	236	1.01316	0.9094	1.26347	0.801881	1.2801	0.479387	1.41659e-07	1.23605	0.387838	0.592547
5	156.68	156.68	63.1	54.46	52.96	sp|P00450|CERU_HUMAN	Ceruloplasmin OS=Homo sapiens GN=CP PE=1 SV=1	HUMAN	116	0.843558	0.0242811	1.15818	0.72835	0.97699	0.443946	1.38109e-17	1.11925	0.396644	0.496889
6	155.35	155.57	52.98	46.72	39.75	sp|P01024|CO3_HUMAN	Complement C3 OS=Homo sapiens GN=C3 PE=1 SV=2	HUMAN	102	0.341445	5.90519e-14	1.25464	0.272146	0.428392	0.441137	2.36627e-16	1.16292	0.379335	0.513009
7	137.82	137.82	61.98	57.92	53.94	sp|P08603|CFAH_HUMAN	Complement factor H OS=Homo sapiens GN=CFH PE=1 SV=4	HUMAN	104	0.631855	5.64644e-09	1.13055	0.558893	0.714341	0.425135	2.31697e-06	1.36243	0.312041	0.579218
8	131.49	131.67	52.97	42.11	31.73	sp|Q09666|AHNK_HUMAN	Neuroblast differentiation-associated protein AHNAK OS=Homo sapiens GN=AHNAK PE=1 SV=2	HUMAN	123	0.836164	4.26483e-05	1.08459	0.770952	0.906892	0.543254	1.45746e-18	1.10268	0.492665	0.599037
9	119	119.05	73.07	67.48	61.75	sp|P02787|TRFE_HUMAN	Serotransferrin OS=Homo sapiens GN=TF PE=1 SV=?		122	0.0433168	6.30608e-26	1.31411	0.0329628	0.0569232	0.0977474	9.1407e-25	1.24166	0.0787232	0.121369
10	117.94	118.11	69.44	61.25	52.69	sp|P06396|GELS_HUMAN	Gelsolin OS=Homo sapiens GN=GSN PE=1 SV=1	HUMAN	96	1.1354	0.187762	1.2116	0.937102	1.37565	0.525529	3.96828e-10	1.16279	0.451957	0.611077
11	113.6	113.6	73.16	65.8	61.26	sp|P02790|HEMO_HUMAN	Hemopexin OS=Homo sapiens GN=HPX PE=1 SV=2	HUMAN	125	0.301355	2.55329e-15	1.18448	0.254419	0.35695	0.272201	2.96435e-13	1.24587	0.218483	0.339128
12	110.72	110.89	88.89	88.89	83.13	sp|TRY1_BOVIN			372	0.310271	1.32922e-09	1.21018	0.256386	0.375483	0.949907	0.848177	1.7546	0.541382	1.6667
13	108.37	108.7	33.6	27.2	25.51	tr|Q5HY54|Q5HY54_HUMAN	Filamin-A OS=Homo sapiens GN=FLNA PE=2 SV=1	HUMAN	62	1.30876	0.000140771	1.13973	1.14831	1.49163	1.53611	1.20425e-05	1.19342	1.28715	1.83322
14	106.45	106.95	83.74	74.14	72.41	sp|P00738|HPT_HUMAN	Haptoglobin OS=Homo sapiens GN=HP PE=1 SV=1	HUMAN	105	0.0852559	3.36831e-18	1.29502	0.0658337	0.110408	1.06849	0.775094	1.59962	0.667965	1.70919
15	103.62	103.8	60.99	53.53	49.35	sp|P01833|PIGR_HUMAN	Polymeric immunoglobulin receptor OS=Homo sapiens GN=PIGR PE=1 SV=4	HUMAN	106	2.16866	2.47176e-08	1.22452	1.77104	2.65556	2.80634	8.26802e-08	1.33443	2.10303	3.74486
16	101.44	101.44	82.13	75.47	73.33	sp|P60709|ACTB_HUMAN	Actin, cytoplasmic 1 OS=Homo sapiens GN=ACTB PE=1 SV=1	HUMAN	86	1.44042	0.0318794	1.38971	1.03649	2.00176	1.70952	0.0122548	1.4959	1.1428	2.55727
17	95.18	96	17.21	15.25	12.51	tr|E9PBJ0|E9PBJ0_HUMAN	Mucin-5B OS=Homo sapiens GN=MUC5B PE=4 SV=1	HUMAN	71	2.78802	1.49705e-09	1.28978	2.16163	3.59592	7.1207	2.02392e-09	1.63833	4.34632	11.6661
18	94.21	94.6	47.49	38.6	31.34	sp|P01023|A2MG_HUMAN	Alpha-2-macroglobulin OS=Homo sapiens GN=A2M PE=1 SV=3	HUMAN	62	0.424144	1.49947e-10	1.1963	0.354547	0.507403	0.335959	1.64399e-12	1.20555	0.278677	0.405016
19	93.03	93.28	38.01	29.08	23.21	sp|P35579|MYH9_HUMAN	Myosin-9 OS=Homo sapiens GN=MYH9 PE=1 SV=4	HUMAN	55	1.2692	4.5736e-05	1.11322	1.14012	1.4129	2.3277	2.54891e-13	1.18778	1.9597	2.7648
20	92.26	93.03	37.33	29.82	25.69	tr|B0V2C8|B0V2C8_HUMAN	C4d-A OS=Homo sapiens GN=C4A PE=4 SV=1	HUMAN	54	0.667077	0.000148356	1.21458	0.549226	0.810216	0.491484	1.22736e-13	1.13655	0.432434	0.558597
21	88.38	90.08	87.34	75.95	71.73	sp|P02774|VTDB_HUMAN	Vitamin D-binding protein OS=Homo sapiens GN=GC PE=1 SV=1	HUMAN	104	0.515869	3.80155e-09	1.18142	0.436652	0.609459	0.423715	0.00408642	1.75924	0.240852	0.745414
22	83.97	107.15	69.35	65.82	61.58	tr|E7ER44|E7ER44_HUMAN	Lactoferroxin-C OS=Homo sapiens GN=LTF PE=4 SV=1	HUMAN	91	1.1528	0.0199782	1.12588	1.02391	1.29792	2.50017	5.71842e-10	1.25675	1.98939	3.14208
23	82.85	83.16	33.61	28.58	23.39	tr|E9PE77|E9PE77_HUMAN	Ugl-Y3 OS=Homo sapiens GN=FN1 PE=4 SV=1	HUMAN	47	0.784413	0.00155576	1.15488	0.679214	0.905906	0.559332	0.00026412	1.33888	0.417761	0.748879
24	81.79	81.91	66.55	58.93	50.78	sp|P26038|MOES_HUMAN	Moesin OS=Homo sapiens GN=MSN PE=1 SV=3	HUMAN	51	1.71284	1.8625e-05	1.24392	1.37697	2.13065	1.57054	0.000147736	1.23814	1.26846	1.94456
25	81.19	81.24	44.23	35.45	31.52	sp|P02671|FIBA_HUMAN	Fibrinogen alpha chain OS=Homo sapiens GN=FGA PE=1 SV=2	HUMAN	65	0.432227	5.14999e-07	1.28692	0.33586	0.556243	0.419004	1.6088e-06	1.32535	0.316146	0.555327
26	73.53	85.9	22.72	18.89	16.54	sp|P98088|MUC5A_HUMAN	Mucin-5AC (Fragments) OS=Homo sapiens GN=MUC5AC PE=1 SV=3	HUMAN	70	2.04489	1.12818e-05	1.32678	1.54124	2.71312	5.01241	1.40171e-09	1.49019	3.36361	7.46941
27	66.78	67	86.89	84.64	81.65	sp|P02647|APOA1_HUMAN	Apolipoprotein A-I OS=Homo sapiens GN=APOA1 PE=1 SV=1	HUMAN	44	0.171592	1.28022e-07	1.65719	0.103543	0.284361	0.149552	6.43999e-09	1.58894	0.0941206	0.237628
28	65.85	65.97	40.96	34.22	31.66	tr|B7ZKJ8|B7ZKJ8_HUMAN	ITIH4 protein OS=Homo sapiens GN=ITIH4 PE=2 SV=1	HUMAN	52	0.469274	2.13412e-12	1.08816	0.431255	0.510644	0.373441	1.11159e-08	1.21625	0.307041	0.454199
29	63.82	64.19	63.64	56.46	49.6	tr|E9PKE3|E9PKE3_HUMAN	Heat shock cognate 71 kDa protein OS=Homo sapiens GN=HSPA8 PE=3 SV=1	HUMAN	48	1.78402	0.00672977	1.4538	1.22715	2.5936	1.60044	0.00557359	1.34162	1.19292	2.14717
30	63.47	63.47	82.73	73.64	65.15	sp|P01857|IGHG1_HUMAN	Ig gamma-1 chain C region OS=Homo sapiens GN=IGHG1 PE=1 SV=1	HUMAN	125	0.262488					0.517894
31	59.44	59.88	67.67	56.03	47.84	sp|P01008|ANT3_HUMAN	Antithrombin-III OS=Homo sapiens GN=SERPINC1 PE=1 SV=1	HUMAN	42	0.164159	1.18206e-15	1.20479	0.136255	0.197778	0.143394	1.55979e-14	1.25449	0.114304	0.179886
32	59.3	59.81	66.31	55.79	51.5	sp|P08670|VIME_HUMAN	Vimentin OS=Homo sapiens GN=VIM PE=1 SV=4	HUMAN	47	1.01573	0.797371	1.13169	0.897532	1.1495	0.768334	0.00141651	1.16385	0.660163	0.894229
33	57.43	57.43	82.31	82.31	70.75	sp|P68871|HBB_HUMAN	Hemoglobin subunit beta OS=Homo sapiens GN=HBB PE=1 SV=2	HUMAN	49	0.36817	0.0123161	2.09585	0.175666	0.771629	0.637537	0.022243	1.45337	0.438662	0.926575
34	57.27	57.48	52.48	47.73	41.53	sp|Q8TDL5|BPIB1_HUMAN	BPI fold-containing family B member 1 OS=Homo sapiens GN=BPIFB1 PE=2 SV=1	HUMAN	40	3.53468	0.000138133	1.53467	2.30322	5.42458	6.14938	2.17019e-05	1.60884	3.82224	9.89337
35	56.1	57.64	17.39	8.464	5.127	sp|Q15149-8|PLEC_HUMAN	Isoform 8 of Plectin OS=Homo sapiens GN=PLEC	HUMAN	27	1.12697	0.236604	1.2249	0.920051	1.38043	1.03534	0.664015	1.17644	0.880056	1.21801
36	54.76	54.79	53.91	47.05	42.74	sp|P13796|PLSL_HUMAN	Plastin-2 OS=Homo sapiens GN=LCP1 PE=1 SV=6	HUMAN	41	1.18347	0.210818	1.31358	0.900952	1.55459	1.01806	0.894635	1.32306	0.769472	1.34696
37	54.46	54.55	79.84	75.81	66.13	sp|P06753-2|TPM3_HUMAN	Isoform 2 of Tropomyosin alpha-3 chain OS=Homo sapiens GN=TPM3	HUMAN	36	1.23748	0.0837421	1.28253	0.964874	1.5871	1.50121	0.124576	1.72648	0.869519	2.59181
38	54.18	54.49	68.79	63.42	63.42	sp|P25311|ZA2G_HUMAN	Zinc-alpha-2-glycoprotein OS=Homo sapiens GN=AZGP1 PE=1 SV=2	HUMAN	67	0.458232	1.29903e-14	1.11271	0.411816	0.509878	0.860168	0.0311285	1.14559	0.750851	0.9854
39	53.27	53.33	90.57	80.19	80.19	sp|P01834|IGKC_HUMAN	Ig kappa chain C region OS=Homo sapiens GN=IGKC PE=1 SV=1	HUMAN	109	0.100885	0.0078498	4.49437	0.022447	0.453416	0.156746	0.0130682	3.83948	0.0408248	0.601823
40	52.87	52.92	100	100	94.62	sp|P05109|S10A8_HUMAN	Protein S100-A8 OS=Homo sapiens GN=S100A8 PE=1 SV=1	HUMAN	66	1.58587	1.32025e-06	1.13564	1.39645	1.80098	1.88063	0.000156553	1.30849	1.43726	2.46078
41	51.73	54.18	47.65	38.02	32.22	sp|P00747|PLMN_HUMAN	Plasminogen OS=Homo sapiens GN=PLG PE=1 SV=2	HUMAN	34	0.34597	1.21073e-12	1.16592	0.296735	0.403374	0.295586	2.99571e-15	1.14042	0.259191	0.337091
42	50.8	51.27	68.43	57.6	48.85	sp|P06733|ENOA_HUMAN	Alpha-enolase OS=Homo sapiens GN=ENO1 PE=1 SV=2	HUMAN	33	1.51177	0.0338334	1.45703	1.03757	2.20269	2.15989	0.0067195	1.67656	1.28828	3.62119
43	50.38	50.69	54.99	47.08	46.89	sp|P14618|KPYM_HUMAN	Pyruvate kinase isozymes M1/M2 OS=Homo sapiens GN=PKM PE=1 SV=4	HUMAN	34	1.39033	0.0541277	1.39972	0.993289	1.94607	1.29601	0.154606	1.44717	0.895549	1.87555
44	50.18	51.82	66.16	56.06	54.04	sp|P06727|APOA4_HUMAN	Apolipoprotein A-IV OS=Homo sapiens GN=APOA4 PE=1 SV=3	HUMAN	32	0.233456	2.63148e-11	1.25943	0.185367	0.294022	0.217141	5.90618e-12	1.24985	0.173734	0.271394
45	49.41	49.45	57.18	54.31	44.5	sp|P36955|PEDF_HUMAN	Pigment epithelium-derived factor OS=Homo sapiens GN=SERPINF1 PE=1 SV=4	HUMAN	30	1.5081	0.00022635	1.19623	1.26071	1.80403	1.11992	0.34527	1.28237	0.873317	1.43614
46	47.41	47.81	37.36	31.63	28.55	sp|P02452|CO1A1_HUMAN	Collagen alpha-1(I) chain OS=Homo sapiens GN=COL1A1 PE=1 SV=5	HUMAN	36	1.75277	0.0225542	1.5828	1.10739	2.77429	1.29695	0.512711	2.39973	0.540458	3.11233
47	47.26	47.26	68.66	58.21	50.75	sp|P02763|A1AG1_HUMAN	Alpha-1-acid glycoprotein 1 OS=Homo sapiens GN=ORM1 PE=1 SV=1	HUMAN	67	0.256415	0.00533214	1.98786	0.128991	0.509715	0.279553	0.0321196	2.99524	0.0933324	0.837327
48	46.43	46.47	59.94	59.94	53.6	sp|P02750|A2GL_HUMAN	Leucine-rich alpha-2-glycoprotein OS=Homo sapiens GN=LRG1 PE=1 SV=2	HUMAN	41	0.564026	2.56513e-08	1.10324	0.511244	0.622258	0.552172	1.82976e-07	1.12937	0.488922	0.623604
49	46.32	64.37	61.95	52.05	43.52	sp|P15311|EZRI_HUMAN	Ezrin OS=Homo sapiens GN=EZR PE=1 SV=4	HUMAN	38	2.15508	1.37797e-07	1.229	1.75353	2.64859	2.56752	2.70484e-08	1.25729	2.0421	3.22812
50	46.06	46.12	71.08	64.71	60.78	tr|E9PK25|E9PK25_HUMAN	Cofilin-1 OS=Homo sapiens GN=CFL1 PE=4 SV=1	HUMAN	35	1.4627	0.158883	1.74461	0.838408	2.55183	1.33188	0.252769	1.69236	0.786998	2.25401
51	46.02	46.02	93.86	93.86	86.84	sp|P06702|S10A9_HUMAN	Protein S100-A9 OS=Homo sapiens GN=S100A9 PE=1 SV=1	HUMAN	123	1.51178	0.00289822	1.28141	1.17978	1.93721	2.18899	0.000394949	1.44506	1.5148	3.16322
52	45.27	45.49	71.21	61.3	57.89	sp|P12429|ANXA3_HUMAN	Annexin A3 OS=Homo sapiens GN=ANXA3 PE=1 SV=3	HUMAN	31	0.895409	0.255009	1.21942	0.734289	1.09188	2.25171	7.7611e-08	1.20389	1.87036	2.71081
53	45.2	45.33	39.51	26.77	22.38	sp|P13671|CO6_HUMAN	Complement component C6 OS=Homo sapiens GN=C6 PE=1 SV=3	HUMAN	26	0.796436	0.00501143	1.16562	0.683271	0.928344	0.67355	7.86497e-06	1.16075	0.580271	0.781824
54	45.15	45.39	83.1	79.58	71.13	sp|P69905|HBA_HUMAN	Hemoglobin subunit alpha OS=Homo sapiens GN=HBA1 PE=1 SV=2	HUMAN	51	0.279806	0.000536854	1.59236	0.175717	0.445553	0.358451	0.000253831	1.38627	0.258572	0.49691
55	43.51	44.51	55.97	52.22	48.95	sp|P01042-2|KNG1_HUMAN	Isoform LMW of Kininogen-1 OS=Homo sapiens GN=KNG1	HUMAN	39	0.243902	0.000815318	1.38299	0.176359	0.337314	0.153043	0.000317741	1.3691	0.111784	0.209531
56	42.74	42.78	68.27	57.79	53.82	sp|P01876|IGHA1_HUMAN	Ig alpha-1 chain C region OS=Homo sapiens GN=IGHA1 PE=1 SV=2	HUMAN	55	0.28806	0.110952	16.1886	0.017794	4.66331	0.320275	0.13244	21.1956	0.0151105	6.78842
57	42.68	43.04	34.04	22.22	19.84	sp|P18206|VINC_HUMAN	Vinculin OS=Homo sapiens GN=VCL PE=1 SV=4	HUMAN	21	1.77433	3.95744e-06	1.21295	1.46281	2.15218	1.10361	0.141257	1.14355	0.965072	1.26204
58	41.24	41.24	70.8	65.78	52.8	sp|P07355|ANXA2_HUMAN	Annexin A2 OS=Homo sapiens GN=ANXA2 PE=1 SV=2	HUMAN	25	0.810255	0.00894917	1.16113	0.697815	0.940812	0.968167	0.434701	1.08968	0.888483	1.055
59	39.91	40.09	55.11	50.85	43.47	sp|P02760|AMBP_HUMAN	Protein AMBP OS=Homo sapiens GN=AMBP PE=1 SV=1	HUMAN	32	0.392632	5.55276e-05	1.43177	0.274227	0.56216	0.40305	4.02661e-05	1.40257	0.287366	0.565306
60	38.83	40.97	36.82	33.05	30.82	sp|P13645|K1C10_HUMAN	Keratin, type I cytoskeletal 10 OS=Homo sapiens GN=KRT10 PE=1 SV=6	HUMAN	25	0.672836	3.53096e-05	1.15348	0.583308	0.776104	0.535884	3.41002e-07	1.16039	0.461812	0.621836
61	38.36	38.47	46.87	38.24	32.49	tr|E7ETH0|E7ETH0_HUMAN	Complement factor I OS=Homo sapiens GN=CFI PE=3 SV=1	HUMAN	35
62	38.11	38.15	53.33	47.47	36.77	sp|P04217|A1BG_HUMAN	Alpha-1B-glycoprotein OS=Homo sapiens GN=A1BG PE=1 SV=4	HUMAN	27	0.208952	0.0387618	4.10857	0.0508575	0.858492	0.260456	0.0319293	3.08177	0.084515	0.802665
63	37.83	38.02	45.36	33.47	26.23	sp|P07900|HS90A_HUMAN	Heat shock protein HSP 90-alpha OS=Homo sapiens GN=HSP90AA1 PE=1 SV=5	HUMAN	23	1.06237	0.515895	1.24937	0.850327	1.32729	1.05284	0.472593	1.18589	0.887802	1.24856
64	37.7	40.52	16.72	6.838	4.383	sp|P04114|APOB_HUMAN	Apolipoprotein B-100 OS=Homo sapiens GN=APOB PE=1 SV=2	HUMAN	18	0.423909	3.41955e-05	1.38457	0.306166	0.586934	0.596048	0.00634889	1.42036	0.419646	0.846602
65	37.45	37.47	78.5	62.5	54.5	tr|H9KV70|H9KV70_HUMAN	Neutrophil gelatinase-associated lipocalin OS=Homo sapiens GN=LCN2 PE=3 SV=1	HUMAN	48	2.51946	5.61982e-05	1.44248	1.74662	3.63426	5.8228	5.8959e-09	1.41657	4.1105	8.24839
66	37.16	38.06	42.91	32.98	28.09	sp|Q9P2E9|RRBP1_HUMAN	Ribosome-binding protein 1 OS=Homo sapiens GN=RRBP1 PE=1 SV=4	HUMAN	27	0.733676	0.0850914	1.42915	0.513365	1.04853	1.08382	0.578547	1.34841	0.803777	1.46144
67	36.86	37.2	47.35	44.91	39.16	sp|P01871|IGHM_HUMAN	Ig mu chain C region OS=Homo sapiens GN=IGHM PE=1 SV=3	HUMAN	42	0.109113	3.85358e-08	1.44078	0.075732	0.157207	0.131662	2.42921e-09	1.29316	0.101814	0.17026
68	36.77	36.97	58.13	46.42	37.74	tr|C9JC84|C9JC84_HUMAN	Fibrinogen gamma chain OS=Homo sapiens GN=FGG PE=4 SV=1	HUMAN	22	0.316544	5.20607e-10	1.16544	0.271609	0.368913	0.332825	4.23302e-06	1.37031	0.242882	0.456075
69	36.7	36.87	45.11	36.93	33.13	sp|P10909-2|CLUS_HUMAN	Isoform 2 of Clusterin OS=Homo sapiens GN=CLU	HUMAN	34	0.645132	2.74086e-05	1.17046	0.551177	0.755102	0.524335	3.68729e-05	1.26918	0.413128	0.665477
70	36.61	38.82	26.9	19.64	17.04	sp|Q86VB7|C163A_HUMAN	Scavenger receptor cysteine-rich type 1 protein M130 OS=Homo sapiens GN=CD163 PE=1 SV=2	HUMAN	22	1.30564	0.0443714	1.29588	1.00753	1.69195	0.775119	0.00235516	1.16246	0.666791	0.901046
71	36.5	37.39	49.07	39.79	31.13	sp|P01019|ANGT_HUMAN	Angiotensinogen OS=Homo sapiens GN=AGT PE=1 SV=1	HUMAN	26	0.810429	0.207528	1.42401	0.569118	1.15406	0.610015	0.000917626	1.24985	0.488072	0.762424
72	36.35	36.38	46.38	43.89	35.16	sp|Q8NBJ4|GOLM1_HUMAN	Golgi membrane protein 1 OS=Homo sapiens GN=GOLM1 PE=1 SV=1	HUMAN	22	1.6936	0.00575804	1.42693	1.18688	2.41665	3.04703	2.20227e-06	1.42585	2.13698	4.34462
73	36.09	36.09	66.09	55.36	48.99	sp|P02749|APOH_HUMAN	Beta-2-glycoprotein 1 OS=Homo sapiens GN=APOH PE=1 SV=3	HUMAN	31	0.212378	1.36962e-06	1.40445	0.151217	0.298274	0.62851	0.16231	1.98542	0.316563	1.24785
74	35.91	35.96	89.87	79.3	73.13	sp|P80723|BASP1_HUMAN	Brain acid soluble protein 1 OS=Homo sapiens GN=BASP1 PE=1 SV=2	HUMAN	28	1.44038	0.0651882	1.48082	0.972693	2.13294	4.28646	6.14126e-05	1.63549	2.62091	7.01045
75	35.61	35.86	44.22	37.4	27.58	tr|E7EPA7|E7EPA7_HUMAN	Transketolase OS=Homo sapiens GN=TKT PE=4 SV=1	HUMAN	23	1.05948	0.581916	1.24593	0.850352	1.32004	1.08909	0.361207	1.21401	0.8971	1.32217
76	35.19	35.35	67.76	60.9	53.13	sp|P04406|G3P_HUMAN	Glyceraldehyde-3-phosphate dehydrogenase OS=Homo sapiens GN=GAPDH PE=1 SV=3	HUMAN	24	2.01224	0.00479874	1.54037	1.30634	3.09958	2.23939	0.00538165	1.66164	1.3477	3.72106
77	35.01	35.39	43.09	37.62	31.51	sp|P00734|THRB_HUMAN	Prothrombin OS=Homo sapiens GN=F2 PE=1 SV=2	HUMAN	25	0.567473	4.72219e-06	1.1781	0.481684	0.668543	0.339575	1.99999e-09	1.17384	0.289285	0.398607
78	34.68	37.2	34.47	30.12	24.69	sp|P04264|K2C1_HUMAN	Keratin, type II cytoskeletal 1 OS=Homo sapiens GN=KRT1 PE=1 SV=6	HUMAN	22	0.766909	0.00115878	1.12644	0.680824	0.863878	0.719926	0.00278717	1.18836	0.605816	0.85553
79	34.49	34.62	51.38	40.16	31.5	sp|P07237|PDIA1_HUMAN	Protein disulfide-isomerase OS=Homo sapiens GN=P4HB PE=1 SV=3	HUMAN	19	0.987161	0.89807	1.23427	0.799795	1.21842	1.22439	0.178646	1.35676	0.902438	1.6612
80	33.83	33.83	50.47	38.52	31.5	sp|P04040|CATA_HUMAN	Catalase OS=Homo sapiens GN=CAT PE=1 SV=3	HUMAN	21	0.676087	0.0027264	1.26225	0.535622	0.85339	1.09855	0.372028	1.24317	0.883667	1.36569
81	33.36	33.42	35.11	28.94	23.49	sp|P10643|CO7_HUMAN	Complement component C7 OS=Homo sapiens GN=C7 PE=1 SV=2	HUMAN	18	1.05116	0.4979	1.1636	0.903362	1.22313	0.644924	0.00994056	1.37692	0.468382	0.888008
82	32.87	33.18	41.54	33.68	29.4	sp|Q08380|LG3BP_HUMAN	Galectin-3-binding protein OS=Homo sapiens GN=LGALS3BP PE=1 SV=1	HUMAN	25	1.14087	0.176271	1.22358	0.932404	1.39595	0.785161	0.0593247	1.28834	0.609435	1.01156
83	32.45	32.54	46.41	37.57	31.12	tr|E9PGN7|E9PGN7_HUMAN	Plasma protease C1 inhibitor OS=Homo sapiens GN=SERPING1 PE=3 SV=1	HUMAN	20	0.60345	0.00702902	1.40001	0.431031	0.844838	0.329039	1.89167e-07	1.23836	0.265705	0.407469
84	31.32	31.52	71.65	66.28	59.39	sp|P00915|CAH1_HUMAN	Carbonic anhydrase 1 OS=Homo sapiens GN=CA1 PE=1 SV=2	HUMAN	21	0.443574	0.0034953	1.58177	0.280429	0.701632	0.685811	0.138469	1.69641	0.404272	1.16342
85	30.99	31.12	37.22	32.33	31.02	sp|P05362|ICAM1_HUMAN	Intercellular adhesion molecule 1 OS=Homo sapiens GN=ICAM1 PE=1 SV=2	HUMAN	17	1.1131	0.409212	1.32316	0.841244	1.47282	0.841106	0.0499767	1.18887	0.707484	0.999966
86	30.73	30.77	28.99	21.07	18.26	sp|P05164|PERM_HUMAN	Myeloperoxidase OS=Homo sapiens GN=MPO PE=1 SV=1	HUMAN	25	0.5907	0.000994291	1.29816	0.45503	0.766821	0.79877	0.0390887	1.23519	0.646678	0.986634
87	30.27	30.53	76.92	76.92	76.92	sp|P11684|UTER_HUMAN	Uteroglobin OS=Homo sapiens GN=SCGB1A1 PE=1 SV=1	HUMAN	46	6.22315	0.00522103	2.84607	2.18658	17.7115	3.80652	0.0106408	2.44706	1.55555	9.31479
88	30.04	30.04	45.33	45.33	41.59	sp|B9A064|IGLL5_HUMAN	Immunoglobulin lambda-like polypeptide 5 OS=Homo sapiens GN=IGLL5 PE=2 SV=2	HUMAN	46	0.113135	0.0288804	3.51471	0.032189	0.397638	0.157661	0.0340998	3.51995	0.0447906	0.554959
89	29.87	34.33	40.55	30.46	27.69	tr|Q6UYC3|Q6UYC3_HUMAN	Lamin A/C OS=Homo sapiens GN=LMNA PE=2 SV=1	HUMAN	18	1.00224	0.975926	1.16804	0.858051	1.17066	0.593818	2.91092e-05	1.20709	0.491942	0.716791
90	29.61	29.83	54.08	47.55	46.2	tr|J3KPS3|J3KPS3_HUMAN	Fructose-bisphosphate aldolase OS=Homo sapiens GN=ALDOA PE=3 SV=1	HUMAN	22	1.30251	0.158122	1.46833	0.88707	1.91251	1.27618	0.0863776	1.32981	0.959672	1.69708
91	29.13	32.19	47.11	38.44	32.08	sp|P04083|ANXA1_HUMAN	Annexin A1 OS=Homo sapiens GN=ANXA1 PE=1 SV=2	HUMAN	20	1.33809	0.000389543	1.13618	1.17771	1.52031	2.31393	1.44405e-05	1.2855	1.80002	2.97456
92	28.92	29.84	15.39	9.681	7.123	sp|Q9Y490|TLN1_HUMAN	Talin-1 OS=Homo sapiens GN=TLN1 PE=1 SV=3	HUMAN	17	0.945303	0.798113	1.58466	0.596535	1.49798	0.957102	0.676309	1.24538	0.768523	1.19195
93	28.66	29.45	21.54	11.99	9.308	sp|P01031|CO5_HUMAN	Complement C5 OS=Homo sapiens GN=C5 PE=1 SV=4	HUMAN	16	0.660809	0.000110306	1.17827	0.560829	0.778614	0.478142	6.61959e-06	1.2465	0.383586	0.596006
94	28.3	28.45	31.12	27.58	26.73	sp|P14780|MMP9_HUMAN	Matrix metalloproteinase-9 OS=Homo sapiens GN=MMP9 PE=1 SV=3	HUMAN	17	1.84281	0.00647287	1.49931	1.22911	2.76295	1.48038	0.03207	1.42279	1.04048	2.10627
95	28.03	28.12	97.73	93.18	81.82	sp|P62328|TYB4_HUMAN	Thymosin beta-4 OS=Homo sapiens GN=TMSB4X PE=1 SV=2	HUMAN	30	2.65357	0.00915322	1.67394	1.58523	4.44191	3.17769	0.0510666	3.20925	0.990165	10.198
96	27.86	28.16	61.19	59.09	52.8	sp|P60174|TPIS_HUMAN	Triosephosphate isomerase OS=Homo sapiens GN=TPI1 PE=1 SV=3	HUMAN	18	1.63137	0.000850798	1.26158	1.29312	2.0581	2.68797	2.47117e-06	1.26013	2.1331	3.38718
97	27.72	27.9	26.33	21.49	17.05	sp|P02461|CO3A1_HUMAN	Collagen alpha-1(III) chain OS=Homo sapiens GN=COL3A1 PE=1 SV=4	HUMAN	22	1.92351	0.00567328	1.3993	1.37463	2.69158	1.38981	0.00729824	1.19892	1.15923	1.66627
98	27.52	27.89	12.17	8.88	6.428	sp|Q8WXI7|MUC16_HUMAN	Mucin-16 OS=Homo sapiens GN=MUC16 PE=1 SV=2	HUMAN	24	1.4271	0.0495504	1.42601	1.00076	2.03505	2.11481	0.000536783	1.46171	1.4468	3.09124
99	27.48	27.53	81.08	75.68	60.14	sp|P61626|LYSC_HUMAN	Lysozyme C OS=Homo sapiens GN=LYZ PE=1 SV=1	HUMAN	46	4.28626	6.91084e-06	1.38613	3.09224	5.94134	14.2674	1.30698e-07	1.42707	9.99774	20.3606
100	27.3	41.48	56.27	45.87	35.47	sp|P11021|GRP78_HUMAN	78 kDa glucose-regulated protein OS=Homo sapiens GN=HSPA5 PE=1 SV=2	HUMAN	26	1.32727	0.0556979	1.33757	0.992295	1.77532	1.51346	0.00343129	1.29358	1.16998	1.95778
101	26.85	28.33	67.66	58.71	49.75	sp|P52566|GDIR2_HUMAN	Rho GDP-dissociation inhibitor 2 OS=Homo sapiens GN=ARHGDIB PE=1 SV=3	HUMAN	19	1.52355	0.00217281	1.22278	1.24597	1.86297	2.92898	0.0105583	2.05066	1.42831	6.00634
102	26.58	26.86	84.29	69.29	69.29	sp|P07737|PROF1_HUMAN	Profilin-1 OS=Homo sapiens GN=PFN1 PE=1 SV=2	HUMAN	20	1.93047	0.0172193	1.66649	1.15841	3.2171	1.53809	0.0430827	1.51266	1.01682	2.32661
103	26.57	26.72	37.96	34.92	26.9	sp|Q02818|NUCB1_HUMAN	Nucleobindin-1 OS=Homo sapiens GN=NUCB1 PE=1 SV=4	HUMAN	13	1.06221	0.545839	1.23754	0.858321	1.31452	1.33785	0.0965545	1.42277	0.940318	1.90346
104	26.41	26.43	74.87	72.73	72.73	tr|H0Y7A7|H0Y7A7_HUMAN	Calmodulin (Fragment) OS=Homo sapiens GN=CALM2 PE=4 SV=1	HUMAN	26	1.20071	0.319634	1.49759	0.801763	1.79818	1.12966	0.339476	1.32486	0.852667	1.49664
105	26.06	26.06	73.37	61.31	50.25	tr|Q5VY30|Q5VY30_HUMAN	Plasma retinol-binding protein(1-182) OS=Homo sapiens GN=RBP4 PE=2 SV=1	HUMAN	17	0.370415	0.00314038	1.70452	0.217313	0.631381	0.320828	0.000752762	1.60572	0.199804	0.51516
106	26.03	28.14	49.16	45.81	45.53	sp|O14745|NHRF1_HUMAN	Na(+)/H(+) exchange regulatory cofactor NHE-RF1 OS=Homo sapiens GN=SLC9A3R1 PE=1 SV=4	HUMAN	16	1.36937	0.00380785	1.20189	1.13935	1.64583	1.70817	0.10785	1.97061	0.866821	3.36614
107	26	26.25	16.74	11.14	8.866	tr|J3QSU6|J3QSU6_HUMAN	Tenascin OS=Homo sapiens GN=TNC PE=4 SV=1	HUMAN	13	1.37152	0.0276953	1.31859	1.04014	1.80848	1.16397	0.195623	1.26913	0.917136	1.47724
108	25.74	25.8	34.83	31.36	26.68	sp|P02675|FIBB_HUMAN	Fibrinogen beta chain OS=Homo sapiens GN=FGB PE=1 SV=2	HUMAN	16	0.392443	5.67495e-05	1.34723	0.291296	0.528713	0.554843	0.00318286	1.39709	0.397141	0.775167
109	25.59	25.95	37.21	28.98	19.68	sp|P02748|CO9_HUMAN	Complement component C9 OS=Homo sapiens GN=C9 PE=1 SV=2	HUMAN	19	0.908644	0.267877	1.19682	0.759213	1.08749	0.745122	0.0118803	1.24166	0.600103	0.925186
110	25	27.17	38.15	34.6	31.61	sp|P02765|FETUA_HUMAN	Alpha-2-HS-glycoprotein OS=Homo sapiens GN=AHSG PE=1 SV=1	HUMAN	20	0.213504	2.29265e-07	1.24861	0.170993	0.266583	0.207263	9.47741e-05	1.65835	0.124981	0.343715
111	24.93	25.03	40.53	33.5	30.58	sp|P07339|CATD_HUMAN	Cathepsin D OS=Homo sapiens GN=CTSD PE=1 SV=1	HUMAN	16	1.28954	0.0705555	1.32309	0.974641	1.70619	1.10137	0.408587	1.28326	0.858262	1.41334
112	24.88	24.94	52.66	46.75	44.67	sp|P51884|LUM_HUMAN	Lumican OS=Homo sapiens GN=LUM PE=1 SV=2	HUMAN	26	1.1163	0.0552749	1.11973	0.996941	1.24996	0.442524	0.00609235	1.678	0.263721	0.742554
113	24.61	24.68	58.92	47.77	39.49	sp|P10451|OSTP_HUMAN	Osteopontin OS=Homo sapiens GN=SPP1 PE=1 SV=1	HUMAN	20	2.23825	0.00427017	1.58191	1.4149	3.54072	1.00382	0.983386	1.51957	0.660599	1.52538
114	24.54	24.66	77.78	70	70	sp|P06703|S10A6_HUMAN	Protein S100-A6 OS=Homo sapiens GN=S100A6 PE=1 SV=1	HUMAN	17	2.18833	0.015034	1.78339	1.22707	3.90264	0.821699	0.464624	1.82313	0.450707	1.49807
115	24.12	24.16	71.43	54.62	53.78	sp|P61769|B2MG_HUMAN	Beta-2-microglobulin OS=Homo sapiens GN=B2M PE=1 SV=1	HUMAN	23	1.01322	0.887323	1.31168	0.772465	1.32902	1.36412	0.0301598	1.28932	1.05801	1.75879
116	24.09	24.13	32.57	30.67	29.14	sp|P04196|HRG_HUMAN	Histidine-rich glycoprotein OS=Homo sapiens GN=HRG PE=1 SV=1	HUMAN	17	0.343161	4.51764e-07	1.20854	0.283946	0.414725	0.165025	3.56794e-05	1.71774	0.096071	0.283471
117	24	24.48	66.48	58.52	53.98	sp|Q9BW30|TPPP3_HUMAN	Tubulin polymerization-promoting protein family member 3 OS=Homo sapiens GN=TPPP3 PE=1 SV=1	HUMAN	15	0.635414	0.000217589	1.21347	0.523635	0.771054	0.581507	0.0101863	1.47696	0.393718	0.858864
118	23.89	23.96	31.16	26.88	21.58	sp|P07357|CO8A_HUMAN	Complement component C8 alpha chain OS=Homo sapiens GN=C8A PE=1 SV=2	HUMAN	13	0.794324	0.00022586	1.09892	0.722819	0.872901	0.400818	2.76912e-06	1.25867	0.318444	0.504499
119	23.83	23.83	21.57	18.3	17.32	tr|H3BMA1|H3BMA1_HUMAN	Mesothelin, cleaved form OS=Homo sapiens GN=MSLN PE=4 SV=1	HUMAN	14	1.62973	0.0118498	1.42104	1.14686	2.31592	0.775595	0.0159374	1.21427	0.638733	0.941782
120	23.64	23.93	28.98	22.39	17.12	sp|P19827|ITIH1_HUMAN	Inter-alpha-trypsin inhibitor heavy chain H1 OS=Homo sapiens GN=ITIH1 PE=1 SV=3	HUMAN	14	0.57702	9.7932e-07	1.13257	0.509477	0.653516	0.460318	3.32109e-05	1.28969	0.356921	0.593669
121	23.1	23.39	31.52	23.8	19.02	sp|Q32MZ4-3|LRRF1_HUMAN	Isoform 3 of Leucine-rich repeat flightless-interacting protein 1 OS=Homo sapiens GN=LRRFIP1	HUMAN	13	0.79538	0.0518418	1.26	0.631253	1.00218	1.07277	0.512992	1.25698	0.853454	1.34845
122	22.96	23.25	31.6	24.08	22.54	tr|F5H5D3|F5H5D3_HUMAN	Tubulin alpha-1C chain OS=Homo sapiens GN=TUBA1C PE=3 SV=1	HUMAN	14	0.783432	0.350702	1.90004	0.412324	1.48855	0.627159	0.0120843	1.3461	0.465907	0.844221
123	22.93	23.18	15.11	10.3	7.692	sp|P22897|MRC1_HUMAN	Macrophage mannose receptor 1 OS=Homo sapiens GN=MRC1 PE=1 SV=1	HUMAN	13	0.867625	0.0798871	1.17522	0.738268	1.01965	0.494021	8.96121e-06	1.24202	0.397758	0.613582
124	22.88	23.14	72.79	72.79	72.79	sp|P02766|TTHY_HUMAN	Transthyretin OS=Homo sapiens GN=TTR PE=1 SV=1	HUMAN	17	0.140427	0.00432452	1.74595	0.0804302	0.245178	0.292581	0.0308187	2.58704	0.113095	0.756918
125	22.86	22.89	44.33	37.73	32.19	sp|P30740|ILEU_HUMAN	Leukocyte elastase inhibitor OS=Homo sapiens GN=SERPINB1 PE=1 SV=1	HUMAN	14	1.55054	0.000247804	1.19293	1.29977	1.84969	1.22088	0.0631664	1.23712	0.986874	1.51038
126	22.79	22.81	35.77	29.5	26.99	sp|P04004|VTNC_HUMAN	Vitronectin OS=Homo sapiens GN=VTN PE=1 SV=1	HUMAN	16	0.389463	0.000125002	1.39541	0.279102	0.543462	0.302758	2.87681e-05	1.38418	0.218727	0.419073
127	22.74	23.98	25.44	21.55	18.34	sp|O00391|QSOX1_HUMAN	Sulfhydryl oxidase 1 OS=Homo sapiens GN=QSOX1 PE=1 SV=3	HUMAN	15	2.25045	0.000177721	1.33028	1.69171	2.99374	1.17885	0.0317769	1.15733	1.01859	1.36431
128	22.56	22.56	48.44	42.19	42.19	sp|Q96KK5|H2A1H_HUMAN	Histone H2A type 1-H OS=Homo sapiens GN=HIST1H2AH PE=1 SV=3	HUMAN	21	0.704686	0.667985	10.4914	0.0671682	7.39312	1.0442	0.97704	81.9174	0.012747	85.5385
129	22.55	22.55	70.2	54.69	46.12	sp|P63104|1433Z_HUMAN	14-3-3 protein zeta/delta OS=Homo sapiens GN=YWHAZ PE=1 SV=1	HUMAN	19	0.923055	0.784605	2.34595	0.393468	2.16544	1.09268	0.522425	1.47784	0.739379	1.61481
130	22.13	23.04	58.85	50	40.27	sp|P16401|H15_HUMAN	Histone H1.5 OS=Homo sapiens GN=HIST1H1B PE=1 SV=3	HUMAN	15	1.12114	0.752917	3.91351	0.286479	4.38759	2.73391	0.0304782	2.16694	1.26165	5.9242
131	22.01	22.01	50	48.8	48.8	sp|P29966|MARCS_HUMAN	Myristoylated alanine-rich C-kinase substrate OS=Homo sapiens GN=MARCKS PE=1 SV=4	HUMAN	12	1.38919	0.0673501	1.4376	0.966322	1.9971	2.81592	0.000900258	1.46046	1.92811	4.11255
132	21.76	21.79	40.29	38.13	25.9	sp|P27797|CALR_HUMAN	Calreticulin OS=Homo sapiens GN=CALR PE=1 SV=1	HUMAN	13	1.13008	0.407964	1.36731	0.826498	1.54516	1.07382	0.532355	1.27526	0.842036	1.3694
133	21.7	24.67	47.19	41.99	33.33	sp|P68104|EF1A1_HUMAN	Elongation factor 1-alpha 1 OS=Homo sapiens GN=EEF1A1 PE=1 SV=1	HUMAN	16	1.27333	0.306706	1.67925	0.758274	2.13824	0.923	0.686437	1.56863	0.588413	1.44784
134	21.49	23.56	28.02	19.04	13.48	tr|Q5T985|Q5T985_HUMAN	Inter-alpha (Globulin) inhibitor H2 OS=Homo sapiens GN=ITIH2 PE=2 SV=1	HUMAN	12	0.627248	0.00195996	1.2773	0.491072	0.801186	0.384825	6.63083e-06	1.26204	0.304922	0.485665
135	21.47	21.77	25.59	20.43	15.48	tr|B7TY16|B7TY16_HUMAN	Actinin alpha 1 isoform 3 OS=Homo sapiens GN=ACTN1 PE=2 SV=1	HUMAN	12	1.02458	0.825375	1.29406	0.791756	1.32586	1.14719	0.352115	1.39536	0.822143	1.60074
136	21.14	24.62	35.39	25.38	20.87	sp|P43652|AFAM_HUMAN	Afamin OS=Homo sapiens GN=AFM PE=1 SV=1	HUMAN	14	0.161205	5.31913e-09	1.31325	0.122753	0.211704	0.861696	0.229774	1.29219	0.666849	1.11347
137	21.02	22.61	37.26	36.26	25.49	sp|Q9UGM3|DMBT1_HUMAN	Deleted in malignant brain tumors 1 protein OS=Homo sapiens GN=DMBT1 PE=1 SV=2	HUMAN	24	1.99285	0.00671191	1.55021	1.28554	3.08935	8.42263	0.000461453	2.37291	3.54949	19.9862
138	20.97	20.97	65.24	63.1	53.48	sp|P30086|PEBP1_HUMAN	Phosphatidylethanolamine-binding protein 1 OS=Homo sapiens GN=PEBP1 PE=1 SV=3	HUMAN	12	0.999611	0.998395	1.61589	0.618615	1.61526	0.737201	0.105943	1.48875	0.49518	1.09751
139	20.94	21.19	48.68	32.13	26.38	sp|P00558|PGK1_HUMAN	Phosphoglycerate kinase 1 OS=Homo sapiens GN=PGK1 PE=1 SV=3	HUMAN	12	1.72633	0.000405886	1.24252	1.38938	2.145	1.97281	0.00180336	1.40796	1.40118	2.77765
140	20.93	20.96	60.27	49.32	43.15	sp|P01034|CYTC_HUMAN	Cystatin-C OS=Homo sapiens GN=CST3 PE=1 SV=1	HUMAN	16	0.942087	0.613013	1.30552	0.721621	1.22991	1.1576	0.359722	1.42358	0.813163	1.64794
141	20.79	20.87	59.06	46.85	42.52	sp|P18669|PGAM1_HUMAN	Phosphoglycerate mutase 1 OS=Homo sapiens GN=PGAM1 PE=1 SV=2	HUMAN	11	1.41673	0.0213811	1.32762	1.06712	1.88087	0.991385	0.934019	1.25846	0.787776	1.24762
142	20.62	20.63	93.46	93.46	82.35	sp|P00441|SODC_HUMAN	Superoxide dismutase [Cu-Zn] OS=Homo sapiens GN=SOD1 PE=1 SV=?		15	0.948629	0.747869	1.44119	0.658226	1.36716	1.04561	0.687218	1.27929	0.817339	1.33765
143	20.57	20.59	36.87	32.74	31.27	sp|P07858|CATB_HUMAN	Cathepsin B OS=Homo sapiens GN=CTSB PE=1 SV=3	HUMAN	14	1.05101	0.870715	2.00763	0.523506	2.11004	1.31746	0.209302	1.60259	0.82208	2.11134
144	20.51	20.98	26.2	15.63	12.82	sp|P19338|NUCL_HUMAN	Nucleolin OS=Homo sapiens GN=NCL PE=1 SV=3	HUMAN	11	0.888539	0.367443	1.31882	0.673739	1.17182	0.977741	0.889926	1.4188	0.689134	1.38721
145	19.98	22.18	45	35.31	32.19	sp|P08758|ANXA5_HUMAN	Annexin A5 OS=Homo sapiens GN=ANXA5 PE=1 SV=2	HUMAN	13	0.447017	0.000111398	1.2085	0.369895	0.54022	1.84643	0.000429515	1.21093	1.5248	2.2359
146	19.87	19.94	55.56	48.61	45.83	sp|P23284|PPIB_HUMAN	Peptidyl-prolyl cis-trans isomerase B OS=Homo sapiens GN=PPIB PE=1 SV=2	HUMAN	12	1.59973	0.00762704	1.3233	1.2089	2.11692	4.36062	9.73239e-06	1.23416	3.53327	5.3817
147	19.75	20.33	44.34	31.08	22.41	sp|P05543|THBG_HUMAN	Thyroxine-binding globulin OS=Homo sapiens GN=SERPINA7 PE=1 SV=2	HUMAN	15	0.692634	0.0257249	1.36536	0.50729	0.945695	0.746202	0.011856	1.23448	0.604469	0.921168
148	19.73	19.96	41.89	33.68	21.68	sp|Q01518|CAP1_HUMAN	Adenylyl cyclase-associated protein 1 OS=Homo sapiens GN=CAP1 PE=1 SV=5	HUMAN	11	1.58887	0.0318665	1.51526	1.04858	2.40755	2.11433	0.00199303	1.51433	1.39621	3.2018
149	19.72	20.04	6.586	3.867	3.201	sp|Q9Y6R7|FCGBP_HUMAN	IgGFc-binding protein OS=Homo sapiens GN=FCGBP PE=1 SV=3	HUMAN	12	0.959724	0.835664	1.55634	0.616656	1.49365	0.991501	0.953754	1.38949	0.713574	1.37768
150	19.08	19.1	65.91	56.06	50	sp|P03973|SLPI_HUMAN	Antileukoproteinase OS=Homo sapiens GN=SLPI PE=1 SV=2	HUMAN	16	4.62122	2.75408e-05	1.4567	3.1724	6.73172	5.48797	0.0141328	3.45706	1.58747	18.9722
151	19	19	60.85	52.91	47.62	sp|Q13938|CAYP1_HUMAN	Calcyphosin OS=Homo sapiens GN=CAPS PE=1 SV=1	HUMAN	14	0.909001	0.200847	1.17329	0.774745	1.06652	0.631095	0.00185836	1.2517	0.504192	0.789939
152	18.93	19.24	33.33	21.47	15.47	tr|G5E9D3|G5E9D3_HUMAN	Calpastatin OS=Homo sapiens GN=CAST PE=4 SV=1	HUMAN	11	1.05712	0.690138	1.35192	0.78194	1.42914	2.11717	0.010413	1.70114	1.24456	3.6016
153	18.93	19.02	21.93	19.58	16.45	tr|H0YB57|H0YB57_HUMAN	Pulmonary surfactant-associated protein B (Fragment) OS=Homo sapiens GN=SFTPB PE=4 SV=1	HUMAN	12	2.43184	0.0015898	1.29178	1.88255	3.14141	0.504623	0.0229547	1.65631	0.304668	0.835811
154	18.83	20.7	29.5	22.99	19.31	sp|P31146|COR1A_HUMAN	Coronin-1A OS=Homo sapiens GN=CORO1A PE=1 SV=4	HUMAN	10	1.20223	0.43585	1.69402	0.709691	2.03661	2.42942	0.000549881	1.42006	1.71078	3.44993
155	18.73	59.72	68.37	56.18	49.26	sp|ALBU_BOVIN			93	0.376932	0.0209145	2.19171	0.171981	0.826125	14.2232	0.000824011	3.24689	4.38056	46.181
156	18.72	18.79	60.14	44.59	44.59	tr|J3KMY5|J3KMY5_HUMAN	Epididymal secretory protein E1 OS=Homo sapiens GN=NPC2 PE=4 SV=1	HUMAN	14	1.14024	0.580771	1.67902	0.679109	1.91449	1.09068	0.7559	1.84518	0.591094	2.0125
157	18.69	18.69	51.76	41.21	41.21	sp|Q06830|PRDX1_HUMAN	Peroxiredoxin-1 OS=Homo sapiens GN=PRDX1 PE=1 SV=1	HUMAN	12	1.04041	0.795931	1.41721	0.734125	1.47447	0.655174	0.0243139	1.41848	0.461885	0.92935
158	18.5	18.5	57.92	55.83	50	sp|P51858|HDGF_HUMAN	Hepatoma-derived growth factor OS=Homo sapiens GN=HDGF PE=1 SV=1	HUMAN	11	0.827441	0.400483	1.63546	0.505939	1.35324	1.26826	0.142981	1.4013	0.905062	1.77721
159	18.26	18.28	32.1	27.84	23.15	sp|Q96NY7|CLIC6_HUMAN	Chloride intracellular channel protein 6 OS=Homo sapiens GN=CLIC6 PE=2 SV=3	HUMAN	12	1.6978	0.0186201	1.46767	1.1568	2.4918	4.08095	0.0105248	2.36449	1.72593	9.64937
160	18.23	20.71	26.65	22.15	16.37	sp|P35527|K1C9_HUMAN	Keratin, type I cytoskeletal 9 OS=Homo sapiens GN=KRT9 PE=1 SV=3	HUMAN	12	0.816275	0.065141	1.25445	0.650701	1.02398	1.02644	0.827663	1.4189	0.723407	1.45642
161	18	18	37.92	35.78	33.94	tr|B4DU58|B4DU58_HUMAN	Macrophage-capping protein OS=Homo sapiens GN=CAPG PE=2 SV=1	HUMAN	11	1.65768	0.0539829	1.67509	0.989605	2.77676	1.51076	0.0556885	1.52917	0.98796	2.31021
162	17.81	17.85	19.47	17.13	13.91	tr|G8JLA8|G8JLA8_HUMAN	Transforming growth factor-beta-induced protein ig-h3 OS=Homo sapiens GN=TGFBI PE=4 SV=1	HUMAN	9	1.68835	0.00377508	1.35791	1.24335	2.29262	1.1535	0.247709	1.29865	0.888235	1.49799
163	17.73	19.13	50.45	38.58	29.08	sp|P37837|TALDO_HUMAN	Transaldolase OS=Homo sapiens GN=TALDO1 PE=1 SV=2	HUMAN	10	1.05364	0.51981	1.18734	0.887401	1.25103	1.36358	0.0537209	1.37158	0.994165	1.87026
164	17.69	19.68	60.78	47.55	45.1	sp|P52565|GDIR1_HUMAN	Rho GDP-dissociation inhibitor 1 OS=Homo sapiens GN=ARHGDIA PE=1 SV=3	HUMAN	18	1.37186	0.254662	1.93581	0.708673	2.65567	1.0453	0.904223	2.61095	0.40035	2.72922
165	17.63	17.63	61.48	40.98	40.98	sp|P0DJI8|SAA1_HUMAN	Serum amyloid A-1 protein OS=Homo sapiens GN=SAA1 PE=1 SV=1	HUMAN	15	0.31395					0.391752
166	17.49	17.61	58.41	42.77	40.12	sp|P33241|LSP1_HUMAN	Lymphocyte-specific protein 1 OS=Homo sapiens GN=LSP1 PE=1 SV=1	HUMAN	13	1.05457	0.703921	1.36484	0.772672	1.43932	1.67788	0.0373938	1.61424	1.03942	2.70849
167	17.47	17.55	43.95	36.29	33.87	sp|Q8IWL1|SFPA2_HUMAN	Pulmonary surfactant-associated protein A2 OS=Homo sapiens GN=SFTPA2 PE=1 SV=1	HUMAN	20	0.426114	0.00034212	1.23172	0.34595	0.524855	0.868243	0.529241	1.7683	0.491005	1.53531
168	17.47	17.47	54.37	50.49	49.51	sp|P62805|H4_HUMAN	Histone H4 OS=Homo sapiens GN=HIST1H4A PE=1 SV=2	HUMAN	16	0.502341	0.0398687	1.89018	0.265763	0.949517	0.784868	0.27634	1.7056	0.460171	1.33867
169	17.4	28.32	41.1	32.49	28.18	tr|F8VXB4|F8VXB4_HUMAN	Keratin, type II cytoskeletal 8 OS=Homo sapiens GN=KRT8 PE=3 SV=1	HUMAN	19	2.05929	0.014818	1.66437	1.23728	3.42743	1.16777	0.124061	1.241	0.940993	1.4492
170	17.14	19.24	59.79	54.5	51.32	sp|Q99497|PARK7_HUMAN	Protein DJ-1 OS=Homo sapiens GN=PARK7 PE=1 SV=2	HUMAN	15	1.54461	0.128719	1.8493	0.835241	2.85644	1.54869	0.0759073	1.65481	0.935872	2.56279
171	17.13	17.18	57.94	52.38	38.1	sp|P62807|H2B1C_HUMAN	Histone H2B type 1-C/E/F/G/I OS=Homo sapiens GN=HIST1H2BC PE=1 SV=4	HUMAN	13	0.635335	0.00650804	1.33834	0.474719	0.850295	1.32023	0.182064	1.54427	0.854922	2.03879
172	16.98	19.39	63.41	48.78	45.12	sp|P62937|PPIA_HUMAN	Peptidyl-prolyl cis-trans isomerase A OS=Homo sapiens GN=PPIA PE=1 SV=?		12	1.96094	0.00652334	1.53084	1.28096	3.00188	2.93192	0.00105932	1.6431	1.78439	4.81743
173	16.24	16.26	70.18	55.26	55.26	sp|P08118|MSMB_HUMAN	Beta-microseminoprotein OS=Homo sapiens GN=MSMB PE=1 SV=1	HUMAN	18	8.36485	0.000237335	2.26663	3.69044	18.96	14.969	6.43931e-05	2.40236	6.23096	35.9611
174	16.04	52.36	78.83	71.78	58.28	sp|P01859|IGHG2_HUMAN	Ig gamma-2 chain C region OS=Homo sapiens GN=IGHG2 PE=1 SV=2	HUMAN	95	0.108521	0.0911221	58.3651	0.00185935	6.33385	0.196515	0.130347	73.1784	0.00268542	14.3806
175	15.96	16.22	28.32	22.31	22.31	sp|Q9Y279|VSIG4_HUMAN	V-set and immunoglobulin domain-containing protein 4 OS=Homo sapiens GN=VSIG4 PE=1 SV=1	HUMAN	12	1.14275	0.289283	1.30742	0.874051	1.49405	0.775024	0.193809	1.50764	0.514064	1.16846
176	15.73	16.26	21.8	14.16	8.652	sp|Q06033|ITIH3_HUMAN	Inter-alpha-trypsin inhibitor heavy chain H3 OS=Homo sapiens GN=ITIH3 PE=1 SV=2	HUMAN	13	0.972085	0.767347	1.2508	0.77717	1.21588	0.497871	0.00293678	1.42473	0.34945	0.70933
177	15.63	15.73	59.46	48.65	48.65	sp|P07108-5|ACBP_HUMAN	Isoform 5 of Acyl-CoA-binding protein OS=Homo sapiens GN=DBI	HUMAN	11	1.83528	7.76137e-06	1.14838	1.59814	2.10759	2.04286	0.000169303	1.28348	1.59166	2.62197
178	15.61	15.66	33.64	30.37	30.37	sp|P30044|PRDX5_HUMAN	Peroxiredoxin-5, mitochondrial OS=Homo sapiens GN=PRDX5 PE=1 SV=4	HUMAN	10	1.21512	0.571672	2.66286	0.456323	3.2357	0.688793	0.0245428	1.32587	0.519504	0.913246
179	15.53	16.51	26.34	18.81	17.23	sp|P30101|PDIA3_HUMAN	Protein disulfide-isomerase A3 OS=Homo sapiens GN=PDIA3 PE=1 SV=4	HUMAN	10	1.40213	0.0011078	1.17018	1.19822	1.64075	1.33271	0.1307	1.4819	0.899323	1.97495
180	15.5	51.58	60.37	50.08	35.57	sp|P08107|HSP71_HUMAN	Heat shock 70 kDa protein 1A/1B OS=Homo sapiens GN=HSPA1A PE=1 SV=5	HUMAN	38	1.40439	0.0949178	1.5161	0.926319	2.1292	1.39578	0.124852	1.57213	0.887825	2.19434
181	15.41	15.53	30.12	23.7	21.48	sp|P08185|CBG_HUMAN	Corticosteroid-binding globulin OS=Homo sapiens GN=SERPINA6 PE=1 SV=1	HUMAN	11	0.56562	0.0281259	1.61428	0.350385	0.913068	0.505569	0.00812396	1.51137	0.33451	0.764101
182	15.14	18.46	42.96	41.48	29.26	sp|P36980|FHR2_HUMAN	Complement factor H-related protein 2 OS=Homo sapiens GN=CFHR2 PE=1 SV=1	HUMAN	10	0.44725	0.00272359	1.45703	0.30696	0.651657	0.300337	0.00145029	1.62987	0.18427	0.489512
183	15.03	15.08	69.8	55.7	30.2	sp|P16949|STMN1_HUMAN	Stathmin OS=Homo sapiens GN=STMN1 PE=1 SV=3	HUMAN	8	1.20089	0.0309391	1.17648	1.02075	1.41283	1.13129	0.119289	1.17508	0.962735	1.32935
184	14.96	15.2	33.57	20.56	12.3	sp|P06744-2|G6PI_HUMAN	Isoform 2 of Glucose-6-phosphate isomerase OS=Homo sapiens GN=GPI	HUMAN	9	1.63924	0.026067	1.51536	1.08175	2.48403	1.1766	0.225764	1.33584	0.88079	1.57175
185	14.93	15.04	19.43	13.69	13.69	sp|P50895|BCAM_HUMAN	Basal cell adhesion molecule OS=Homo sapiens GN=BCAM PE=1 SV=2	HUMAN	9	0.51711	0.00657495	1.48661	0.347845	0.768741	0.467059	0.0200879	1.81018	0.258018	0.845463
186	14.89	14.96	51.9	50	50	sp|P09211|GSTP1_HUMAN	Glutathione S-transferase P OS=Homo sapiens GN=GSTP1 PE=1 SV=2	HUMAN	8	1.09118	0.55833	1.46204	0.74634	1.59534	0.545757	0.000741175	1.19793	0.455583	0.653779
187	14.81	18.18	46.67	37.65	31.76	sp|P62258|1433E_HUMAN	14-3-3 protein epsilon OS=Homo sapiens GN=YWHAE PE=1 SV=1	HUMAN	14	0.917977	0.823021	2.54356	0.360903	2.33493	0.96232	0.706922	1.28145	0.750963	1.23316
188	14.66	14.66	47.32	33.12	30.6	sp|P02649|APOE_HUMAN	Apolipoprotein E OS=Homo sapiens GN=APOE PE=1 SV=1	HUMAN	11	0.438634	0.000368766	1.35626	0.323415	0.5949	0.541486	0.00145095	1.33147	0.406683	0.720973
189	14.54	14.54	67.54	67.54	67.54	sp|O75368|SH3L1_HUMAN	SH3 domain-binding glutamic acid-rich-like protein OS=Homo sapiens GN=SH3BGRL PE=1 SV=1	HUMAN	10	1.47526	0.000286648	1.14795	1.28512	1.69353	1.7591	0.00331392	1.35847	1.29491	2.38968
190	14.52	14.52	32.03	27.34	22.14	sp|P01880|IGHD_HUMAN	Ig delta chain C region OS=Homo sapiens GN=IGHD PE=1 SV=2	HUMAN	10	1.50351	0.133621	1.79683	0.836754	2.70156	1.00848	0.924072	1.24179	0.812114	1.25232
191	14.48	14.6	27.53	21.82	21.82	sp|Q01459|DIAC_HUMAN	Di-N-acetylchitobiase OS=Homo sapiens GN=CTBS PE=1 SV=1	HUMAN	8	0.813452	0.0664565	1.25214	0.649651	1.01855	1.28479	0.00915928	1.18087	1.08801	1.51717
192	14.42	16.12	34.87	24.36	17.44	sp|P29508|SPB3_HUMAN	Serpin B3 OS=Homo sapiens GN=SERPINB3 PE=1 SV=2	HUMAN	9	2.00313	0.0156952	1.66467	1.20332	3.33456	0.953905	0.682503	1.30842	0.729054	1.2481
193	14.28	14.32	25.64	20.55	18.01	sp|Q13228|SBP1_HUMAN	Selenium-binding protein 1 OS=Homo sapiens GN=SELENBP1 PE=1 SV=2	HUMAN	7	0.766993	0.00232305	1.14422	0.670321	0.877608	0.517055	7.68753e-06	1.14309	0.452332	0.591038
194	14.27	14.39	28.18	21.92	19.57	sp|P04745|AMY1_HUMAN	Alpha-amylase 1 OS=Homo sapiens GN=AMY1A PE=1 SV=2	HUMAN	12	1.00469	0.94692	1.17015	0.858602	1.17564	1.0506	0.761609	1.43702	0.731096	1.50972
195	14.2	28.11	35.52	27.07	24.41	sp|P35908|K22E_HUMAN	Keratin, type II cytoskeletal 2 epidermal OS=Homo sapiens GN=KRT2 PE=1 SV=2	HUMAN	18	0.792425	0.0489094	1.26003	0.628896	0.998475	0.526402	0.0012759	1.31803	0.399387	0.693812
196	14.07	14.11	26.5	18.93	18.93	sp|Q15113|PCOC1_HUMAN	Procollagen C-endopeptidase enhancer 1 OS=Homo sapiens GN=PCOLCE PE=1 SV=2	HUMAN	8	1.50602	0.106532	1.6956	0.888193	2.55359	0.848926	0.398715	1.55461	0.546072	1.31974
197	14	14.08	13.95	9.754	8.204	tr|H3BU97|H3BU97_HUMAN	Apolipoprotein B receptor OS=Homo sapiens GN=APOBR PE=4 SV=1	HUMAN	7	0.718085	0.131474	1.62571	0.441706	1.1674	1.07138	0.650952	1.47997	0.723917	1.58561
198	13.79	14.14	23.22	20.16	15.89	sp|P08697|A2AP_HUMAN	Alpha-2-antiplasmin OS=Homo sapiens GN=SERPINF2 PE=1 SV=3	HUMAN	11	0.37728	0.0019471	1.52607	0.247224	0.575754	0.454302	0.00174356	1.39626	0.325371	0.634324
199	13.76	13.79	69.85	56.62	36.76	sp|P68431|H31_HUMAN	Histone H3.1 OS=Homo sapiens GN=HIST1H3A PE=1 SV=2	HUMAN	10	0.704219	0.292137	2.15099	0.327394	1.51477	1.28483	0.459915	2.23727	0.574284	2.87451
200	13.74	13.76	94.56	87.99	61.73	tr|F5H7K6|F5H7K6_HUMAN	Polyubiquitin-C OS=Homo sapiens GN=UBC PE=4 SV=1	HUMAN	13	1.6465	0.0618733	1.70099	0.967965	2.80068	0.977133	0.877063	1.40633	0.694811	1.37417
201	13.37	13.76	46.43	46.43	38.84	tr|F8W7I2|F8W7I2_HUMAN	Prostaglandin-H2 D-isomerase OS=Homo sapiens GN=PTGDS PE=3 SV=1	HUMAN	9	0.662988	0.000947352	1.1642	0.569478	0.771852	0.495005	7.21206e-05	1.16322	0.425547	0.575799
202	13.25	17.9	22.53	16.04	12.63	sp|P20700|LMNB1_HUMAN	Lamin-B1 OS=Homo sapiens GN=LMNB1 PE=1 SV=2	HUMAN	10	0.823506	0.240692	1.43082	0.575547	1.17829	1.02601	0.867006	1.41855	0.723282	1.45546
203	13.25	13.35	72.22	59.26	51.85	sp|O75347|TBCA_HUMAN	Tubulin-specific chaperone A OS=Homo sapiens GN=TBCA PE=1 SV=3	HUMAN	9	1.47017	0.0458656	1.45659	1.00932	2.14143	1.07846	0.422615	1.23339	0.874384	1.33017
204	13.23	13.23	68.89	58.89	51.11	sp|P05204|HMGN2_HUMAN	Non-histone chromosomal protein HMG-17 OS=Homo sapiens GN=HMGN2 PE=1 SV=3	HUMAN	7	1.27828	0.320627	1.77315	0.720911	2.26658	3.27273	0.00580719	1.9382	1.68854	6.34321
205	13.18	14.64	27.56	22.1	19.59	tr|Q14UF6|Q14UF6_HUMAN	Complement decay-accelerating factor OS=Homo sapiens GN=DAF PE=2 SV=1	HUMAN	9	0.776548	0.0186058	1.20862	0.642507	0.938553	0.754353	0.0105008	1.19958	0.628849	0.904903
206	13.11	13.13	47.18	38.73	33.8	sp|Q14019|COTL1_HUMAN	Coactosin-like protein OS=Homo sapiens GN=COTL1 PE=1 SV=3	HUMAN	9	1.99876	3.6021e-06	1.15314	1.73331	2.30485	2.42449	8.09599e-05	1.32096	1.83541	3.20265
207	13.04	13.12	35.14	25.68	19.82	sp|P09210|GSTA2_HUMAN	Glutathione S-transferase A2 OS=Homo sapiens GN=GSTA2 PE=1 SV=4	HUMAN	6	1.43446	0.0327498	1.38099	1.03872	1.98096	0.923092	0.724463	1.65762	0.556879	1.53013
208	12.98	13.29	10.08	5.458	4.059	sp|O75882|ATRN_HUMAN	Attractin OS=Homo sapiens GN=ATRN PE=1 SV=2	HUMAN	7	0.58888	0.000251947	1.21665	0.484018	0.716461	0.814205	0.193685	1.3966	0.58299	1.13712
209	12.84	15.52	24.81	17.94	16.79	sp|P05186|PPBT_HUMAN	Alkaline phosphatase, tissue-nonspecific isozyme OS=Homo sapiens GN=ALPL PE=1 SV=4	HUMAN	9	1.01123	0.958629	1.65752	0.610085	1.67614	1.08388	0.641221	1.49462	0.725188	1.62
210	12.56	12.65	29.46	22.77	18.75	sp|P30041|PRDX6_HUMAN	Peroxiredoxin-6 OS=Homo sapiens GN=PRDX6 PE=1 SV=3	HUMAN	8	1.05318	0.79581	1.59778	0.65915	1.68274	0.634976	0.000497004	1.17766	0.539183	0.747788
211	12.42	12.48	54.86	40	36.57	sp|P02792|FRIL_HUMAN	Ferritin light chain OS=Homo sapiens GN=FTL PE=1 SV=2	HUMAN	7	0.75267	0.00439125	1.16965	0.643499	0.880361	0.366556	2.60872e-05	1.23827	0.296023	0.453894
212	12.4	12.43	24.79	21.27	13.07	sp|P04003|C4BPA_HUMAN	C4b-binding protein alpha chain OS=Homo sapiens GN=C4BPA PE=1 SV=2	HUMAN	9	0.0910268	4.2175e-05	1.87512	0.0485445	0.170686	0.201287	0.000603277	1.90265	0.105793	0.38298
213	12.22	12.25	14.01	12.75	11.48	tr|E7EPC6|E7EPC6_HUMAN	CD44 antigen OS=Homo sapiens GN=CD44 PE=4 SV=2	HUMAN	10	1.1643	0.238074	1.32859	0.876339	1.54688	1.05785	0.745153	1.4982	0.70608	1.58487
214	12.17	12.24	28.85	20.93	17.18	tr|J3KQ45|J3KQ45_HUMAN	Trans-Golgi network integral membrane protein 2 OS=Homo sapiens GN=TGOLN2 PE=4 SV=1	HUMAN	6	1.04728	0.517304	1.17865	0.888543	1.23437	1.04967	0.729427	1.38716	0.756707	1.45606
215	12.13	12.46	18.56	8.133	7.216	tr|E9PFU1|E9PFU1_HUMAN	Programmed cell death 6-interacting protein OS=Homo sapiens GN=PDCD6IP PE=4 SV=1	HUMAN	6	1.08641	0.75062	1.88604	0.57603	2.04902	1.28883	0.408934	2.06287	0.624773	2.65868
216	12.09	12.09	62.77	48.94	38.3	tr|E9PBB5|E9PBB5_HUMAN	Trefoil factor 3 OS=Homo sapiens GN=TFF3 PE=4 SV=1	HUMAN	12	3.71393	0.0158898	2.32744	1.59572	8.64396	7.76956	0.0545361	8.36943	0.928327	65.0268
217	12.08	12.09	37.07	37.07	32.68	sp|P04792|HSPB1_HUMAN	Heat shock protein beta-1 OS=Homo sapiens GN=HSPB1 PE=1 SV=2	HUMAN	9	0.992932	0.934013	1.23307	0.805252	1.22435	0.820597	0.29579	1.54582	0.530848	1.2685
218	11.95	12.03	20.74	19.26	13.89	sp|Q16610|ECM1_HUMAN	Extracellular matrix protein 1 OS=Homo sapiens GN=ECM1 PE=1 SV=2	HUMAN	7	0.878282	0.448432	1.47948	0.593641	1.2994	0.522037	0.000851762	1.29551	0.402957	0.676306
219	11.9	11.96	28.11	20.74	19.35	sp|O60664|PLIN3_HUMAN	Perilipin-3 OS=Homo sapiens GN=PLIN3 PE=1 SV=3	HUMAN	6	0.760509	0.608355	3.62715	0.209671	2.75848	1.08212	0.833407	2.49867	0.433079	2.70386
220	11.89	11.98	22.92	13.45	13.45	sp|P14314|GLU2B_HUMAN	Glucosidase 2 subunit beta OS=Homo sapiens GN=PRKCSH PE=1 SV=2	HUMAN	8	1.00982	0.956592	1.50629	0.670402	1.52108	1.06231	0.763972	1.58071	0.672047	1.6792
221	11.88	12.05	21.43	16.73	13.35	tr|F5GXJ9|F5GXJ9_HUMAN	CD166 antigen OS=Homo sapiens GN=ALCAM PE=4 SV=1	HUMAN	6	1.06682	0.533792	1.27105	0.839325	1.35598	0.826677	0.114953	1.28758	0.642037	1.06442
222	11.86	13.95	29.87	24.68	19.81	sp|Q12841|FSTL1_HUMAN	Follistatin-related protein 1 OS=Homo sapiens GN=FSTL1 PE=1 SV=1	HUMAN	8	1.2214	0.299717	1.59426	0.766124	1.94724	0.801044	0.226682	1.53954	0.520315	1.23324
223	11.82	11.87	49.06	42.14	28.3	sp|P01591|IGJ_HUMAN	Immunoglobulin J chain OS=Homo sapiens GN=IGJ PE=1 SV=4	HUMAN	10	0.714707	0.0314959	1.33276	0.53626	0.952533	0.714588	0.0159448	1.26164	0.566398	0.90155
224	11.78	11.88	37.67	26.91	22.87	sp|P02743|SAMP_HUMAN	Serum amyloid P-component OS=Homo sapiens GN=APCS PE=1 SV=2	HUMAN	7	0.95314	0.809877	1.57506	0.605147	1.50125	0.553324	0.00758333	1.45871	0.379325	0.807138
225	11.74	12.01	92.39	81.52	39.13	sp|P80511|S10AC_HUMAN	Protein S100-A12 OS=Homo sapiens GN=S100A12 PE=1 SV=2	HUMAN	7	1.50759	0.0590274	1.54035	0.978726	2.32222	0.769578	0.0756154	1.3482	0.570817	1.03755
226	11.53	11.56	30	20.3	20.3	sp|Q6P5S2|CF058_HUMAN	UPF0762 protein C6orf58 OS=Homo sapiens GN=C6orf58 PE=1 SV=2	HUMAN	8	2.13898	0.00640466	1.61462	1.32476	3.45363	4.40214	0.00287881	2.24361	1.96208	9.87668
227	11.32	21.52	66.2	54.46	38.03	sp|P16403|H12_HUMAN	Histone H1.2 OS=Homo sapiens GN=HIST1H1C PE=1 SV=2	HUMAN	14	1.39356	0.309865	2.37757	0.586127	3.31328	2.75195	0.0341688	2.38572	1.15351	6.56538
228	11.27	11.31	50.43	39.32	37.61	sp|P06309|KV205_HUMAN	Ig kappa chain V-II region GM607 (Fragment) OS=Homo sapiens PE=4 SV=1	HUMAN	8	0.155697	0.0171948	2.89555	0.0537712	0.450827	0.262877	0.0122617	1.9013	0.138261	0.499808
229	11.24	11.32	41.98	20.99	18.7	tr|G3V4W0|G3V4W0_HUMAN	Heterogeneous nuclear ribonucleoproteins C1/C2 (Fragment) OS=Homo sapiens GN=HNRNPC PE=4 SV=1	HUMAN	6	1.24834	0.353204	1.74619	0.714894	2.17984	1.00816	0.938273	1.29271	0.779883	1.30326
230	11.19	11.22	15.2	14.37	14.37	sp|Q9NZP8|C1RL_HUMAN	Complement C1r subcomponent-like protein OS=Homo sapiens GN=C1RL PE=1 SV=2	HUMAN	6	0.561327	0.0217306	1.45119	0.386804	0.814594	0.626317	0.0819295	1.84915	0.338705	1.15816
231	11.12	15.27	45	31.43	23.1	sp|P80303|NUCB2_HUMAN	Nucleobindin-2 OS=Homo sapiens GN=NUCB2 PE=1 SV=2	HUMAN	9	1.77578	0.00591645	1.42829	1.24329	2.53633	2.74505	0.00379079	1.78227	1.54019	4.89242
232	11.09	11.22	24.26	16.46	15.19	sp|P48637|GSHB_HUMAN	Glutathione synthetase OS=Homo sapiens GN=GSS PE=1 SV=1	HUMAN	7	0.853375	0.492704	1.7351	0.491829	1.48069	1.26575	0.460656	2.13511	0.592826	2.70252
233	10.97	10.98	13.51	10.67	9.815	sp|P23142|FBLN1_HUMAN	Fibulin-1 OS=Homo sapiens GN=FBLN1 PE=1 SV=4	HUMAN	7	0.783343	0.306697	1.78427	0.439028	1.39769	0.515661	0.0296707	1.74291	0.295862	0.898749
234	10.89	11.23	27.95	26.22	22.77	sp|O43866|CD5L_HUMAN	CD5 antigen-like OS=Homo sapiens GN=CD5L PE=1 SV=1	HUMAN	6	0.146913	8.68148e-05	1.39162	0.10557	0.204446	0.19068	0.00244993	1.96799	0.0968908	0.375255
235	10.89	10.98	33.48	31.25	24.55	sp|P02741|CRP_HUMAN	C-reactive protein OS=Homo sapiens GN=CRP PE=1 SV=1	HUMAN	6	0.842298	0.335711	1.49385	0.563845	1.25826	0.436989	0.0168991	1.85575	0.235478	0.810942
236	10.87	11.04	36.14	34.16	34.16	sp|P05452|TETN_HUMAN	Tetranectin OS=Homo sapiens GN=CLEC3B PE=1 SV=3	HUMAN	8	0.755337	0.486198	2.61156	0.289228	1.97261	0.319499	7.45661e-05	1.2802	0.24957	0.409022
237	10.86	10.91	62	41	22	sp|P02652|APOA2_HUMAN	Apolipoprotein A-II OS=Homo sapiens GN=APOA2 PE=1 SV=1	HUMAN	5	0.232569	0.000455339	1.58549	0.146685	0.368737	0.195476	0.000286899	1.59641	0.122447	0.312059
238	10.75	10.75	28.1	22.66	16.92	sp|P25774|CATS_HUMAN	Cathepsin S OS=Homo sapiens GN=CTSS PE=1 SV=3	HUMAN	6	0.93611	0.687728	1.46644	0.638355	1.37275	1.3684	0.0740601	1.42659	0.959209	1.95214
239	10.64	43.22	80.24	72.58	67.34	sp|P67936|TPM4_HUMAN	Tropomyosin alpha-4 chain OS=Homo sapiens GN=TPM4 PE=1 SV=3	HUMAN	31	0.979873	0.887171	1.41933	0.690378	1.39076	1.1932	0.155932	1.31265	0.908994	1.56625
240	10.63	10.67	45.26	41.05	35.79	sp|P25815|S100P_HUMAN	Protein S100-P OS=Homo sapiens GN=S100P PE=1 SV=2	HUMAN	7	2.63448	0.00345347	1.61366	1.63261	4.25116	2.0846	0.0188948	1.73789	1.1995	3.6228
241	10.61	10.84	24.07	11.36	9.153	tr|G3XAD8|G3XAD8_HUMAN	Stress-induced-phosphoprotein 1 OS=Homo sapiens GN=STIP1 PE=4 SV=1	HUMAN	6	1.59985	0.00610159	1.33227	1.20085	2.13144	1.58528	0.0220498	1.45065	1.0928	2.2997
242	10.58	32.51	47.1	35.36	27.9	sp|P08238|HS90B_HUMAN	Heat shock protein HSP 90-beta OS=Homo sapiens GN=HSP90AB1 PE=1 SV=4	HUMAN	19	0.797117	0.56983	3.10812	0.256462	2.47754	0.937353	0.872482	3.2503	0.288389	3.04668
243	10.53	18.16	62.9	56.85	40.73	sp|P31947|1433S_HUMAN	14-3-3 protein sigma OS=Homo sapiens GN=SFN PE=1 SV=1	HUMAN	13	3.39368	0.0383862	3.05153	1.11212	10.3559	2.78373	0.1113	4.03533	0.68984	11.2333
244	10.46	14.77	14.79	11.49	9.37	sp|P08123|CO1A2_HUMAN	Collagen alpha-2(I) chain OS=Homo sapiens GN=COL1A2 PE=1 SV=7	HUMAN	11	1.35839	0.301098	2.59535	0.523392	3.52549	0.979272	0.943761	3.10005	0.315889	3.03579
245	10.44	12.33	26.14	17.61	14.2	tr|F5H098|F5H098_HUMAN	Malate dehydrogenase, cytoplasmic OS=Homo sapiens GN=MDH1 PE=3 SV=1	HUMAN	7	1.01883	0.89753	1.39152	0.732171	1.41772	0.954178	0.784814	1.47839	0.645418	1.41064
246	10.4	10.4	59.07	39.07	29.3	sp|P09429|HMGB1_HUMAN	High mobility group protein B1 OS=Homo sapiens GN=HMGB1 PE=1 SV=3	HUMAN	7	1.27982	0.237409	1.60444	0.797672	2.0534	1.60622	0.0266008	1.47989	1.08537	2.37703
247	10.37	10.38	50.5	39.6	39.6	sp|P26447|S10A4_HUMAN	Protein S100-A4 OS=Homo sapiens GN=S100A4 PE=1 SV=1	HUMAN	7	1.42152	0.0380816	1.37058	1.03716	1.9483	1.0066	0.961468	1.49	0.675566	1.49983
248	10.32	10.38	40.44	39.89	39.89	sp|P02794|FRIH_HUMAN	Ferritin heavy chain OS=Homo sapiens GN=FTH1 PE=1 SV=2	HUMAN	8	0.618392	0.0429237	1.58112	0.39111	0.97775	0.491325	0.0299547	1.83708	0.267448	0.902603
249	10.27	10.35	29.6	21.6	16.53	sp|P35247|SFTPD_HUMAN	Pulmonary surfactant-associated protein D OS=Homo sapiens GN=SFTPD PE=1 SV=3	HUMAN	8	0.384882	0.000558879	1.30301	0.295379	0.501505	0.20226	0.0560542	5.28202	0.0382922	1.06834
250	10.22	10.28	51.63	36.96	30.43	sp|P63241-2|IF5A1_HUMAN	Isoform 2 of Eukaryotic translation initiation factor 5A-1 OS=Homo sapiens GN=EIF5A	HUMAN	7	2.42248	0.00619964	1.5933	1.52042	3.85974	1.15152	0.707197	2.63939	0.436282	3.03932
251	10.18	10.47	17.87	11.79	10.84	tr|C9JIZ6|C9JIZ6_HUMAN	Saposin-D OS=Homo sapiens GN=PSAP PE=4 SV=1	HUMAN	6	0.98559	0.954293	1.93605	0.509071	1.90816	1.04082	0.889746	2.12142	0.490623	2.20802
252	10.06	12.09	8.661	5.433	4.094	sp|Q92954-4|PRG4_HUMAN	Isoform D of Proteoglycan 4 OS=Homo sapiens GN=PRG4	HUMAN	7	0.394852	0.000351468	1.40623	0.280787	0.555253	0.395898	6.44051e-05	1.29627	0.305414	0.51319
253	10.01	10.21	19.95	18.78	17.61	tr|Q5JP53|Q5JP53_HUMAN	Tubulin beta chain OS=Homo sapiens GN=TUBB PE=3 SV=1	HUMAN	7	0.523637	0.587789	77.5426	0.0067529	40.6042	0.788966	0.623235	5.88948	0.133962	4.6466
254	9.91	10.02	29.85	23.88	19.7	sp|P09668|CATH_HUMAN	Pro-cathepsin H OS=Homo sapiens GN=CTSH PE=1 SV=4	HUMAN	6	0.750662	0.23008	1.75557	0.427589	1.31784	0.790294	0.259545	1.64496	0.480433	1.3
255	9.86	9.97	32.13	21.88	10.25	sp|P00338-3|LDHA_HUMAN	Isoform 3 of L-lactate dehydrogenase A chain OS=Homo sapiens GN=LDHA	HUMAN	7	1.18797	0.14016	1.28758	0.922639	1.52961	1.15388	0.177855	1.26467	0.912398	1.45927
256	9.83	9.87	40	31.28	31.28	sp|Q9ULZ3|ASC_HUMAN	Apoptosis-associated speck-like protein containing a CARD OS=Homo sapiens GN=PYCARD PE=1 SV=2	HUMAN	5	1.38055	0.206988	1.89576	0.728231	2.61719	1.52376	0.0162549	1.31447	1.15922	2.00294
257	9.8	9.89	15.55	10.7	8.696	sp|Q16881-3|TRXR1_HUMAN	Isoform 3 of Thioredoxin reductase 1, cytoplasmic OS=Homo sapiens GN=TXNRD1	HUMAN	5	1.06996	0.739782	1.69419	0.631546	1.81272	1.69343	0.0396848	1.62639	1.04122	2.75417
258	9.79	9.86	4.418	1.708	1.366	sp|P98160|PGBM_HUMAN	Basement membrane-specific heparan sulfate proteoglycan core protein OS=Homo sapiens GN=HSPG2 PE=1 SV=4	HUMAN	5	0.588249	0.11243	2.03244	0.28943	1.19558	0.353014	0.0381869	2.60533	0.135497	0.919717
259	9.76	11.14	43.48	30.43	21.74	tr|Q6P452|Q6P452_HUMAN	Annexin OS=Homo sapiens GN=ANXA4 PE=2 SV=1	HUMAN	8	1.38037	0.399461	2.58516	0.533958	3.56847	1.31367	0.257486	1.77537	0.73994	2.33224
260	9.75	9.91	22.17	12.7	12.7	sp|P20061|TCO1_HUMAN	Transcobalamin-1 OS=Homo sapiens GN=TCN1 PE=1 SV=2	HUMAN	7	2.55958	0.0312664	2.08004	1.23055	5.32403	5.4328	0.0044382	1.62708	3.33898	8.83962
261	9.74	9.75	30.25	21.01	21.01	tr|B7Z6Z4|B7Z6Z4_HUMAN	Myosin light polypeptide 6 OS=Homo sapiens GN=MYL6 PE=2 SV=1	HUMAN	8	1.4118	0.0898751	1.52566	0.925368	2.15393	1.83436	0.0724186	1.98789	0.922766	3.6465
262	9.68	9.78	22.58	20.79	17.92	tr|B4E1N2|B4E1N2_HUMAN	Insulin-like growth factor-binding protein 7 OS=Homo sapiens GN=IGFBP7 PE=2 SV=1	HUMAN	5	1.61053	0.040554	1.55777	1.03387	2.50884	2.07268	0.0139728	1.62352	1.27666	3.36504
263	9.68	9.77	18.2	9.894	9.894	tr|E9PAU8|E9PAU8_HUMAN	Liver carboxylesterase 1 OS=Homo sapiens GN=CES1 PE=4 SV=1	HUMAN	5	0.593118	0.0122808	1.39702	0.424559	0.828598	0.714496	0.22165	1.90653	0.374762	1.36221
264	9.66	9.68	100	84.69	67.35	sp|P04080|CYTB_HUMAN	Cystatin-B OS=Homo sapiens GN=CSTB PE=1 SV=2	HUMAN	7	2.04059	0.00164673	1.38064	1.478	2.81732	2.16375	0.0278463	1.92415	1.12452	4.16338
265	9.64	10.56	17.77	12.35	9.983	sp|P07358|CO8B_HUMAN	Complement component C8 beta chain OS=Homo sapiens GN=C8B PE=1 SV=3	HUMAN	6	0.926444	0.188439	1.13202	0.818396	1.04876	0.47185	5.1502e-06	1.15426	0.408791	0.544637
266	9.64	9.94	68.15	54.07	39.26	sp|Q01469|FABP5_HUMAN	Fatty acid-binding protein, epidermal OS=Homo sapiens GN=FABP5 PE=1 SV=3	HUMAN	6	1.28647	0.0384446	1.25435	1.02561	1.61368	0.772641	0.0420302	1.27178	0.607525	0.982631
267	9.6	9.62	46.08	46.08	46.08	sp|P61604|CH10_HUMAN	10 kDa heat shock protein, mitochondrial OS=Homo sapiens GN=HSPE1 PE=1 SV=2	HUMAN	5	1.16979	0.415964	1.69907	0.688485	1.98755	0.892114	0.616814	1.92131	0.464326	1.71403
268	9.54	30	77.36	77.36	69.81	sp|P0CG05|LAC2_HUMAN	Ig lambda-2 chain C regions OS=Homo sapiens GN=IGLC2 PE=1 SV=1	HUMAN	51	0.130145	0.327205	2253012	5.77648e-08	293218	0.168567	0.214959	2814.81	5.98857e-05	474.483
269	9.5	9.5	17.02	15.85	12.59	tr|E9PCE8|E9PCE8_HUMAN	Xaa-Pro dipeptidase OS=Homo sapiens GN=PEPD PE=3 SV=1	HUMAN	5	1.18465	0.416695	1.77497	0.667422	2.10271	1.76646	0.172913	2.76338	0.639239	4.88141
270	9.47	11.95	10.42	3.557	2.203	sp|P12111|CO6A3_HUMAN	Collagen alpha-3(VI) chain OS=Homo sapiens GN=COL6A3 PE=1 SV=5	HUMAN	9	1.99899	0.00372039	1.41637	1.41135	2.83131	1.39031	0.262421	1.95623	0.710709	2.71978
271	9.28	9.3	54.81	50	41.35	sp|P10599|THIO_HUMAN	Thioredoxin OS=Homo sapiens GN=TXN PE=1 SV=?		8	1.81666	0.000453451	1.27309	1.42697	2.31278	1.45673	0.00575756	1.26156	1.15471	1.83774
272	9.21	9.23	21.02	17.72	15.32	tr|A6NC48|A6NC48_HUMAN	ADP-ribosyl cyclase 2 OS=Homo sapiens GN=BST1 PE=4 SV=1	HUMAN	5	0.790268	0.0991919	1.34902	0.585808	1.06609	0.987555	0.970166	2.26858	0.435319	2.24035
273	9.15	9.15	52.25	52.25	45.05	sp|P80748|LV302_HUMAN	Ig lambda chain V-III region LOI OS=Homo sapiens PE=1 SV=1	HUMAN	11	0.13857	0.0337959	3.79754	0.0364895	0.526226	0.197815	0.0430393	4.03122	0.0490708	0.797438
274	9.09	24.15	71.14	58.21	47.26	sp|P19652|A1AG2_HUMAN	Alpha-1-acid glycoprotein 2 OS=Homo sapiens GN=ORM2 PE=1 SV=2	HUMAN	27	0.238848	0.018323	2.64177	0.0904122	0.63098	0.281638	0.0282814	2.7504	0.102399	0.774618
275	9.01	9.02	58.97	48.08	39.74	sp|P07998|RNAS1_HUMAN	Ribonuclease pancreatic OS=Homo sapiens GN=RNASE1 PE=1 SV=4	HUMAN	7	0.958267	0.781362	4.54772	0.210714	4.35793	1.17995	0.370526	3.98906	0.295796	4.70689
276	8.92	8.92	32.8	30.4	25.2	sp|P17931|LEG3_HUMAN	Galectin-3 OS=Homo sapiens GN=LGALS3 PE=1 SV=5	HUMAN	7	1.35092	0.0587013	1.37162	0.984908	1.85296	1.8866	0.00109502	1.30374	1.44707	2.45964
277	8.9	9.04	16.4	9.453	8.567	tr|E9PDD1|E9PDD1_HUMAN	Vascular cell adhesion protein 1 OS=Homo sapiens GN=VCAM1 PE=4 SV=1	HUMAN	5	0.511779	0.0029061	1.2676	0.40374	0.648729	0.325092	0.0123107	1.93377	0.168113	0.628653
278	8.81	8.83	37.62	31.19	31.19	sp|P07360|CO8G_HUMAN	Complement component C8 gamma chain OS=Homo sapiens GN=C8G PE=1 SV=3	HUMAN	5	0.864492	0.123301	1.23066	0.702462	1.0639	0.470293	0.0128186	1.63065	0.288409	0.766882
279	8.73	9.89	20.05	13.45	12.22	sp|P54727|RD23B_HUMAN	UV excision repair protein RAD23 homolog B OS=Homo sapiens GN=RAD23B PE=1 SV=1	HUMAN	6	1.24894	0.338749	1.86461	0.669813	2.3288	1.14908	0.451341	1.66869	0.688614	1.91746
280	8.66	8.97	14.91	6.707	4.905	sp|Q9Y4L1|HYOU1_HUMAN	Hypoxia up-regulated protein 1 OS=Homo sapiens GN=HYOU1 PE=1 SV=1	HUMAN	5	0.913395	0.710426	1.76694	0.516935	1.61392	0.914376	0.839732	2.82127	0.3241	2.57971
281	8.62	8.62	27.22	23.96	20.41	sp|P09467|F16P1_HUMAN	Fructose-1,6-bisphosphatase 1 OS=Homo sapiens GN=FBP1 PE=1 SV=5	HUMAN	7	0.562795	0.0248324	1.48769	0.378301	0.837263	1.09784	0.724432	2.69322	0.40763	2.95672
282	8.6	8.69	32.66	32.66	24.62	sp|P37802|TAGL2_HUMAN	Transgelin-2 OS=Homo sapiens GN=TAGLN2 PE=1 SV=3	HUMAN	8	1.86289	0.0940919	2.26531	0.822354	4.22003	1.24711	0.214732	1.56509	0.79683	1.95183
283	8.59	8.59	43.75	42.97	36.72	sp|P02775|CXCL7_HUMAN	Platelet basic protein OS=Homo sapiens GN=PPBP PE=1 SV=3	HUMAN	5	0.946624	0.643911	1.33236	0.710484	1.26125	2.11789	0.00672077	1.54318	1.37242	3.26829
284	8.56	8.89	20.46	13.58	8.02	sp|P09960|LKHA4_HUMAN	Leukotriene A-4 hydrolase OS=Homo sapiens GN=LTA4H PE=1 SV=2	HUMAN	6	0.992483	0.978235	2.87046	0.345758	2.84888	0.858538	0.436783	1.97559	0.434572	1.69612
285	8.52	10.19	36.31	31.38	26.15	sp|P14550|AK1A1_HUMAN	Alcohol dehydrogenase [NADP(+)] OS=Homo sapiens GN=AKR1A1 PE=1 SV=3	HUMAN	6	1.31938	0.629041	5.18017	0.254698	6.83462	1.04873	0.934848	5.50228	0.190599	5.7704
286	8.45	8.55	75	68.42	60.53	sp|Q15847|APM2_HUMAN	Adipose most abundant gene transcript 2 protein OS=Homo sapiens GN=APM2 PE=1 SV=1	HUMAN	7	1.65365	0.126799	3.63282	0.455196	6.0074	0.474055	0.08699	3.68429	0.128669	1.74656
287	8.41	10.28	33.05	32.62	17.17	sp|O75015|FCG3B_HUMAN	Low affinity immunoglobulin gamma Fc region receptor III-B OS=Homo sapiens GN=FCGR3B PE=1 SV=2	HUMAN	6	0.886252	0.567726	1.63053	0.543535	1.44506	0.854175	0.460167	1.63047	0.523884	1.3927
288	8.38	8.38	31.67	23.33	20.83	sp|Q96C19|EFHD2_HUMAN	EF-hand domain-containing protein D2 OS=Homo sapiens GN=EFHD2 PE=1 SV=1	HUMAN	7	1.33209	0.0442024	1.31609	1.01215	1.75316	1.95986	0.0351126	1.81551	1.07951	3.55814
289	8.27	8.44	25	22.38	16.28	sp|P40199|CEAM6_HUMAN	Carcinoembryonic antigen-related cell adhesion molecule 6 OS=Homo sapiens GN=CEACAM6 PE=1 SV=3	HUMAN	4	0.53976	0.484541	22.6252	0.0238566	12.2122	0.704274	0.0661649	1.50472	0.468044	1.05974
290	8.25	8.26	48.63	41.78	41.78	sp|P12273|PIP_HUMAN	Prolactin-inducible protein OS=Homo sapiens GN=PIP PE=1 SV=1	HUMAN	6	0.858925	0.567716	1.89568	0.453096	1.62825	2.05331	0.0327788	1.88162	1.09125	3.86355
291	8.25	8.25	19.47	14.21	12.37	sp|P50552|VASP_HUMAN	Vasodilator-stimulated phosphoprotein OS=Homo sapiens GN=VASP PE=1 SV=3	HUMAN	7	1.81041	0.00297852	1.29119	1.40212	2.33758	3.3106	0.00403843	1.75042	1.89131	5.79495
292	8.23	8.6	34.3	30.43	19.81	sp|P01033|TIMP1_HUMAN	Metalloproteinase inhibitor 1 OS=Homo sapiens GN=TIMP1 PE=1 SV=1	HUMAN	6	1.07263	0.559008	1.54367	0.694857	1.65578	0.480252	0.0397789	1.91359	0.25097	0.919004
293	8.2	8.28	30.55	20.1	16.71	sp|P36222|CH3L1_HUMAN	Chitinase-3-like protein 1 OS=Homo sapiens GN=CHI3L1 PE=1 SV=2	HUMAN	6	0.465729	0.344891	8.79487	0.0529546	4.09602	0.913835	0.815711	3.08805	0.295926	2.82197
294	8.17	14.69	47.15	33.33	26.42	sp|Q04917|1433F_HUMAN	14-3-3 protein eta OS=Homo sapiens GN=YWHAH PE=1 SV=4	HUMAN	12	1.22029	0.660607	72.7224	0.0167801	88.7423	0.991619	0.949331	3.82209	0.259444	3.79006
295	8.13	8.13	59.13	59.13	46.96	sp|P01767|HV306_HUMAN	Ig heavy chain V-III region BUT OS=Homo sapiens PE=1 SV=1	HUMAN	11
296	8.1	8.2	26.6	20.21	20.21	sp|O75223|GGCT_HUMAN	Gamma-glutamylcyclotransferase OS=Homo sapiens GN=GGCT PE=1 SV=1	HUMAN	5	1.46402	0.169376	3.74303	0.391133	5.47988	0.990722	0.978866	35.3795	0.0280027	35.0512
297	8.09	8.15	26.01	17.23	17.23	tr|H3BT71|H3BT71_HUMAN	RNA-binding motif protein, X chromosome OS=Homo sapiens GN=RBMX PE=4 SV=1	HUMAN	6	0.628639	0.0849836	1.79045	0.351107	1.12555	0.654485	0.0342756	1.43986	0.454546	0.94237
298	8.08	16.31	61.48	40.98	40.98	sp|P0DJI9|SAA2_HUMAN	Serum amyloid A-2 protein OS=Homo sapiens GN=SAA2 PE=1 SV=1	HUMAN	12	0.408258					0.314902
299	8.06	8.14	22.72	11.8	11.8	tr|E7EVW7|E7EVW7_HUMAN	Hematopoietic lineage cell-specific protein OS=Homo sapiens GN=HCLS1 PE=4 SV=1	HUMAN	4	0.637904	0.555446	902.501	0.000706818	575.709	1.59224	0.58267	2176.83	0.00073145	3466.05
300	8.06	8.11	21.25	15.3	13.88	sp|P22626|ROA2_HUMAN	Heterogeneous nuclear ribonucleoproteins A2/B1 OS=Homo sapiens GN=HNRNPA2B1 PE=1 SV=2	HUMAN	5	0.736828	0.948766	7.85709e+20	9.37787e-22	5.78932e+20	0.17296	0.518085	17743609856	9.74774e-12	3.06894e+09
301	8.05	8.05	28.68	24.81	22.09	sp|P22692|IBP4_HUMAN	Insulin-like growth factor-binding protein 4 OS=Homo sapiens GN=IGFBP4 PE=1 SV=2	HUMAN	5	0.613126	0.22076	2.74427	0.223421	1.68258	0.404491	0.00131271	1.2768	0.316801	0.516453
302	8.04	8.15	64.13	55.43	36.96	tr|H0YDD8|H0YDD8_HUMAN	60S acidic ribosomal protein P2 (Fragment) OS=Homo sapiens GN=RPLP2 PE=4 SV=1	HUMAN	5	1.01906					1.28025
303	8.04	8.12	12.48	4.79	4.79	sp|O95436-2|NPT2B_HUMAN	Isoform 2 of Sodium-dependent phosphate transport protein 2B OS=Homo sapiens GN=SLC34A2	HUMAN	4	1.83792					2.34744
304	8.04	8.11	13.61	10.02	8.696	sp|Q6UX71|PXDC2_HUMAN	Plexin domain-containing protein 2 OS=Homo sapiens GN=PLXDC2 PE=1 SV=1	HUMAN	4	1.12312	0.24719	1.26879	0.885193	1.425	0.907508	0.547034	1.50689	0.602239	1.36751
305	8.04	8.08	21.38	13.52	13.52	sp|Q92820|GGH_HUMAN	Gamma-glutamyl hydrolase OS=Homo sapiens GN=GGH PE=1 SV=2	HUMAN	4	0.941687	0.472252	1.26253	0.745872	1.18891	1.40733	0.0188891	1.26419	1.11323	1.77914
306	8.02	8.04	21.59	17.18	17.18	sp|Q96S96|PEBP4_HUMAN	Phosphatidylethanolamine-binding protein 4 OS=Homo sapiens GN=PEBP4 PE=1 SV=3	HUMAN	5	0.416997	0.0135794	1.55755	0.267726	0.649494	0.325682	0.00661734	1.48386	0.219484	0.483265
307	8.01	8.01	17.74	9.946	9.946	sp|P14151|LYAM1_HUMAN	L-selectin OS=Homo sapiens GN=SELL PE=1 SV=2	HUMAN	6	0.659159	0.0449448	1.48232	0.44468	0.977085	0.772653	0.117849	1.52042	0.508185	1.17475
308	7.56	8.31	15.38	4.199	1.938	sp|Q13813-2|SPTN1_HUMAN	Isoform 2 of Spectrin alpha chain, non-erythrocytic 1 OS=Homo sapiens GN=SPTAN1	HUMAN	4	1.1126	0.517833	1.51918	0.73237	1.69025	0.916635	0.685539	1.74126	0.526421	1.5961
309	7.56	7.64	20.59	11.76	9.559	sp|Q8NC51|PAIRB_HUMAN	Plasminogen activator inhibitor 1 RNA-binding protein OS=Homo sapiens GN=SERBP1 PE=1 SV=2	HUMAN	4	0.958441	0.752888	1.41823	0.675803	1.35929	1.46948	0.0600548	1.50829	0.974265	2.2164
310	7.55	7.72	17.06	7.58	5.394	tr|H0YAC1|H0YAC1_HUMAN	Plasma kallikrein light chain (Fragment) OS=Homo sapiens GN=KLKB1 PE=3 SV=1	HUMAN	9	0.301344	8.475e-05	1.22805	0.245385	0.370064	0.335754	0.00242432	1.55989	0.215243	0.523739
311	7.5	7.54	15.23	10.22	6.613	sp|P05546|HEP2_HUMAN	Heparin cofactor 2 OS=Homo sapiens GN=SERPIND1 PE=1 SV=3	HUMAN	4	0.668846	0.122921	1.77268	0.377307	1.18565	0.848433	0.77474	4.43798	0.191175	3.76533
312	7.48	7.49	36.02	27.2	19.92	sp|Q14847|LASP1_HUMAN	LIM and SH3 domain protein 1 OS=Homo sapiens GN=LASP1 PE=1 SV=2	HUMAN	7	1.3229	0.529	2.8984	0.456426	3.83431	1.53519	0.452679	3.8728	0.396403	5.94548
313	7.47	7.78	7.008	2.326	1.649	sp|P13611|CSPG2_HUMAN	Versican core protein OS=Homo sapiens GN=VCAN PE=1 SV=3	HUMAN	5	1.50988	0.217134	2.70845	0.557471	4.08945	1.03918	0.795054	1.74784	0.594547	1.81631
314	7.44	9.74	16.31	11.63	8.936	sp|P00736|C1R_HUMAN	Complement C1r subcomponent OS=Homo sapiens GN=C1R PE=1 SV=2	HUMAN	6	0.698012	0.15776	2.01413	0.346557	1.40589	0.509862	0.0164658	1.45733	0.349859	0.743039
315	7.35	7.61	16.76	6.039	2.775	sp|P20908|CO5A1_HUMAN	Collagen alpha-1(V) chain OS=Homo sapiens GN=COL5A1 PE=1 SV=3	HUMAN	4	2.32978	0.0334484	1.97951	1.17695	4.61181	2.51996	0.0360735	2.1739	1.15919	5.47815
316	7.3	7.56	26.31	17.98	10.83	sp|P34932|HSP74_HUMAN	Heat shock 70 kDa protein 4 OS=Homo sapiens GN=HSPA4 PE=1 SV=4	HUMAN	7	1.54296	0.0596086	1.58696	0.972273	2.44863	1.39539	0.129858	1.62601	0.858164	2.26892
317	7.28	7.38	28.91	21.09	21.09	sp|Q71UI9|H2AV_HUMAN	Histone H2A.V OS=Homo sapiens GN=H2AFV PE=1 SV=3	HUMAN	4	0.756825					1.79578
318	7.26	7.8	13.41	5.355	2.22	tr|E7EVA0|E7EVA0_HUMAN	Microtubule-associated protein OS=Homo sapiens GN=MAP4 PE=4 SV=1	HUMAN	5	0.893843	0.619319	1.78499	0.500754	1.5955	0.878348	0.394009	1.45843	0.602258	1.281
319	7.26	7.28	22.13	18.4	12.8	sp|P08571|CD14_HUMAN	Monocyte differentiation antigen CD14 OS=Homo sapiens GN=CD14 PE=1 SV=2	HUMAN	5	0.832517	0.449319	2.3289	0.357472	1.93885	0.98874	0.974514	3.86322	0.255937	3.81972
320	7.25	7.25	40.66	30.77	30.77	sp|P55145|MANF_HUMAN	Mesencephalic astrocyte-derived neurotrophic factor OS=Homo sapiens GN=MANF PE=1 SV=3	HUMAN	4	1.26191	0.059887	1.2849	0.98211	1.62142	2.11952	0.00246856	1.28589	1.64829	2.72547
321	7.21	8.25	9.392	4.586	2.21	tr|G3XAI2|G3XAI2_HUMAN	Laminin subunit beta-1 OS=Homo sapiens GN=LAMB1 PE=4 SV=1	HUMAN	4	1.72766	0.00538508	1.34949	1.28023	2.33146	1.48667	0.128908	1.75258	0.848271	2.60551
322	7.2	17.71	19.65	14.49	10.76	sp|O43707|ACTN4_HUMAN	Alpha-actinin-4 OS=Homo sapiens GN=ACTN4 PE=1 SV=2	HUMAN	10	1.05697	0.814124	1.98814	0.531634	2.1014	1.04004	0.734728	1.39933	0.743242	1.45537
323	7.13	7.23	13.99	7.809	4.429	sp|P13639|EF2_HUMAN	Elongation factor 2 OS=Homo sapiens GN=EEF2 PE=1 SV=4	HUMAN	4	1.12665	0.776156	3.38737	0.332602	3.81636	1.56022	0.315398	3.24464	0.480861	5.06235
324	7.07	7.07	48.51	37.62	37.62	sp|P31151|S10A7_HUMAN	Protein S100-A7 OS=Homo sapiens GN=S100A7 PE=1 SV=4	HUMAN	4	0.235966	0.00349768	1.44551	0.163241	0.341091	0.273231	0.00441643	1.451	0.188305	0.396457
325	7.03	7.03	45.79	30.84	29.91	tr|B8ZZQ6|B8ZZQ6_HUMAN	Prothymosin alpha OS=Homo sapiens GN=PTMA PE=4 SV=1	HUMAN	7
326	7	7.01	20.34	13.49	8.994	sp|P22894|MMP8_HUMAN	Neutrophil collagenase OS=Homo sapiens GN=MMP8 PE=1 SV=1	HUMAN	5	1.1611	0.425582	1.6767	0.692493	1.94682	1.3349	0.272501	1.9849	0.672526	2.64964
327	6.97	6.97	20.53	15.79	15.79	sp|O75995|SASH3_HUMAN	SAM and SH3 domain-containing protein 3 OS=Homo sapiens GN=SASH3 PE=1 SV=2	HUMAN	4	0.802561	0.504886	2.52552	0.31778	2.02688	0.94218	0.925736	6.49923	0.144968	6.12344
328	6.91	7.05	13.29	10.32	10.32	sp|P78324|SHPS1_HUMAN	Tyrosine-protein phosphatase non-receptor type substrate 1 OS=Homo sapiens GN=SIRPA PE=1 SV=2	HUMAN	5	0.833319	0.364524	1.72319	0.483591	1.43597	1.29381	0.0895785	1.3924	0.929197	1.80149
329	6.91	7.01	15.45	12.85	7.292	sp|Q96PD5|PGRP2_HUMAN	N-acetylmuramoyl-L-alanine amidase OS=Homo sapiens GN=PGLYRP2 PE=1 SV=1	HUMAN	4	0.651724	0.117602	2.00291	0.325389	1.30534	0.592098	0.0845434	2.01569	0.293745	1.19349
330	6.86	7	23.62	12.13	9.574	tr|B4DQJ8|B4DQJ8_HUMAN	6-phosphogluconate dehydrogenase, decarboxylating OS=Homo sapiens GN=PGD PE=2 SV=1	HUMAN	4	1.13589	0.468403	1.5558	0.730097	1.76721	1.87657	0.0817837	2.12872	0.881548	3.99471
331	6.85	7	38.14	30.51	30.51	sp|P58546|MTPN_HUMAN	Myotrophin OS=Homo sapiens GN=MTPN PE=1 SV=2	HUMAN	5	2.15919					1.14791
332	6.83	10.08	53.94	48.48	41.21	sp|P60981|DEST_HUMAN	Destrin OS=Homo sapiens GN=DSTN PE=1 SV=3	HUMAN	8	1.63144	0.324861	5.08986	0.320527	8.30377	0.738586	0.307324	2.61174	0.282795	1.92899
333	6.83	6.85	22.71	14.85	14.85	sp|P09497|CLCB_HUMAN	Clathrin light chain B OS=Homo sapiens GN=CLTB PE=1 SV=1	HUMAN	5	0.864402	0.474643	2.05052	0.421552	1.77248	0.84322	0.46151	2.25221	0.374396	1.89911
334	6.81	6.85	23.38	14.93	13.24	sp|P27169|PON1_HUMAN	Serum paraoxonase/arylesterase 1 OS=Homo sapiens GN=PON1 PE=1 SV=3	HUMAN	4	0.222178	0.00682125	2.04583	0.1086	0.454538	0.14897	0.013791	3.20356	0.0465016	0.477235
335	6.79	6.8	40.77	22.31	22.31	sp|P35542|SAA4_HUMAN	Serum amyloid A-4 protein OS=Homo sapiens GN=SAA4 PE=1 SV=2	HUMAN	4	0.248274	0.000369231	1.27792	0.194279	0.317275	0.304195	0.00878789	1.85749	0.163766	0.56504
336	6.78	6.78	28.62	20.62	14.77	sp|P18065|IBP2_HUMAN	Insulin-like growth factor-binding protein 2 OS=Homo sapiens GN=IGFBP2 PE=1 SV=2	HUMAN	5	1.1888	0.570921	2.17875	0.545636	2.5901	1.08035	0.706351	1.69902	0.63587	1.83554
337	6.67	6.67	25.49	14.9	14.9	sp|P08311|CATG_HUMAN	Cathepsin G OS=Homo sapiens GN=CTSG PE=1 SV=2	HUMAN	6	1.59392	0.0850094	1.79508	0.887935	2.86121	1.49636	0.0105954	1.25125	1.19589	1.87232
338	6.64	6.86	27.54	17.39	13.41	tr|J3KPA1|J3KPA1_HUMAN	Cysteine-rich secretory protein 3 OS=Homo sapiens GN=CRISP3 PE=4 SV=1	HUMAN	4	2.17322	0.00643093	1.51112	1.43815	3.284	3.87044	0.0136838	2.44557	1.58263	9.46545
339	6.54	6.97	41.03	37.61	37.61	sp|P01602|KV110_HUMAN	Ig kappa chain V-I region HK102 (Fragment) OS=Homo sapiens GN=IGKV1-5 PE=4 SV=1	HUMAN	11	0.161133					0.317946
340	6.5	6.52	51.43	40.95	40.95	sp|P31949|S10AB_HUMAN	Protein S100-A11 OS=Homo sapiens GN=S100A11 PE=1 SV=2	HUMAN	7	1.99495	0.0238936	1.74057	1.14615	3.47236	1.39107	0.135155	1.61073	0.863624	2.24064
341	6.48	7.36	78.07	64.04	51.75	sp|P01625|KV402_HUMAN	Ig kappa chain V-IV region Len OS=Homo sapiens PE=1 SV=2	HUMAN	11	0.110874	0.000596301	1.57591	0.0703554	0.174727	0.183418	0.000577038	1.41464	0.129657	0.259471
342	6.45	6.6	22.6	12.12	9.584	sp|Q6P4A8|PLBL1_HUMAN	Phospholipase B-like 1 OS=Homo sapiens GN=PLBD1 PE=1 SV=2	HUMAN	6	0.971763	0.926097	2.47082	0.393296	2.40105	3.56364	0.11633	6.34071	0.562026	22.596
343	6.4	10.31	29.75	23.75	15	sp|P08727|K1C19_HUMAN	Keratin, type I cytoskeletal 19 OS=Homo sapiens GN=KRT19 PE=1 SV=4	HUMAN	6	2.33893					0.66194
344	6.36	6.36	19.88	19.88	19.88	sp|P10153|RNAS2_HUMAN	Non-secretory ribonuclease OS=Homo sapiens GN=RNASE2 PE=1 SV=2	HUMAN	4	0.525678	0.488384	2638.43	0.000199239	1386.96	0.664555	0.533915	322.808	0.00205867	214.524
345	6.28	7.71	33.53	17.37	17.37	sp|P07195|LDHB_HUMAN	L-lactate dehydrogenase B chain OS=Homo sapiens GN=LDHB PE=1 SV=2	HUMAN	7	1.1574	0.342623	1.51224	0.765352	1.75026	1.35349	0.448948	3.03062	0.446604	4.1019
346	6.21	6.21	32.21	32.21	28.19	sp|Q15828|CYTM_HUMAN	Cystatin-M OS=Homo sapiens GN=CST6 PE=1 SV=1	HUMAN	3	0.967605	0.813323	1.50181	0.644292	1.45316	0.728057	0.111739	1.57202	0.463134	1.14452
347	6.19	6.44	23.35	12.18	10.78	sp|P00352|AL1A1_HUMAN	Retinal dehydrogenase 1 OS=Homo sapiens GN=ALDH1A1 PE=1 SV=2	HUMAN	4	0.858727	0.370108	3.56671	0.240762	3.06283	1.04448	0.827497	7.31845	0.142718	7.64396
348	6.16	6.23	13.28	8.918	7.4	sp|P43121-2|MUC18_HUMAN	Isoform 2 of Cell surface glycoprotein MUC18 OS=Homo sapiens GN=MCAM	HUMAN	4	0.60296	0.00568165	1.25334	0.481082	0.755715	1.10738	0.830816	4.02868	0.274874	4.46127
349	6.12	6.12	39.25	35.51	29.91	sp|P09341|GROA_HUMAN	Growth-regulated alpha protein OS=Homo sapiens GN=CXCL1 PE=1 SV=1	HUMAN	3	2.57715	0.10831	4.31542	0.597195	11.1215	2.00226	0.0349443	1.77465	1.12825	3.5533
350	6.1	6.13	32.81	29.69	25	sp|P13987|CD59_HUMAN	CD59 glycoprotein OS=Homo sapiens GN=CD59 PE=1 SV=1	HUMAN	3	0.6467	0.245713	3.17202	0.203876	2.05135	0.783766	0.712355	11.8027	0.0664054	9.25059
351	6.08	23.91	65.32	58.47	52.42	tr|H7BYY1|H7BYY1_HUMAN	Tropomyosin 1 (Alpha), isoform CRA_m OS=Homo sapiens GN=TPM1 PE=3 SV=1	HUMAN	20	1.29419	0.0879151	1.42294	0.909521	1.84155	1.25553	0.255322	1.85997	0.675028	2.33524
352	6.08	6.53	10.68	3.621	2.414	sp|P46940|IQGA1_HUMAN	Ras GTPase-activating-like protein IQGAP1 OS=Homo sapiens GN=IQGAP1 PE=1 SV=1	HUMAN	3	0.731123	0.118477	1.55045	0.471556	1.13357	0.785933	0.252294	1.64917	0.476564	1.29613
353	6.04	45.22	84.08	73.74	53.58	sp|P01860|IGHG3_HUMAN	Ig gamma-3 chain C region OS=Homo sapiens GN=IGHG3 PE=1 SV=2	HUMAN	55	0.134372	0.0315424	3.54172	0.0379396	0.475907	0.165784	0.139358	160.732	0.00103143	26.6469
354	6.04	6.87	20.17	8.034	4.786	sp|Q9UH65|SWP70_HUMAN	Switch-associated protein 70 OS=Homo sapiens GN=SWAP70 PE=1 SV=1	HUMAN	3	0.96291	0.926121	61.5337	0.0156485	59.2514	1.68299	0.618402	16001	0.00010518	26929.5
355	6.04	6.35	17.37	7.32	5.087	sp|P55072|TERA_HUMAN	Transitional endoplasmic reticulum ATPase OS=Homo sapiens GN=VCP PE=1 SV=4	HUMAN	4	1.4169	0.669407	2311.64	0.00061294	3275.36	0.984678	0.906157	3.74807	0.262716	3.69064
356	6.04	6.12	50	44.32	38.64	tr|Q5T123|Q5T123_HUMAN	SH3 domain binding glutamic acid-rich protein like 3 OS=Homo sapiens GN=SH3BGRL3 PE=2 SV=1	HUMAN	5	2.36105	0.00629681	1.4881	1.58663	3.51347	2.71792	0.00139933	1.31765	2.06271	3.58126
357	6.04	6.04	36.63	26.73	26.73	tr|C9JFR7|C9JFR7_HUMAN	Cytochrome c (Fragment) OS=Homo sapiens GN=CYCS PE=3 SV=1	HUMAN	3	0.868771	0.125823	1.22427	0.709623	1.06361	0.556215	0.00132522	1.22581	0.453753	0.681815
358	6.02	6.07	24.04	15.38	15.38	sp|Q96DA0|ZG16B_HUMAN	Zymogen granule protein 16 homolog B OS=Homo sapiens GN=ZG16B PE=1 SV=3	HUMAN	3	0.575317	0.557471	14.4842	0.0397204	8.33299	1.22779	0.79632	10.1357	0.121135	12.4445
359	6.01	8.03	32.48	25.64	25.64	sp|P01743|HV102_HUMAN	Ig heavy chain V-I region HG3 OS=Homo sapiens PE=4 SV=1	HUMAN	25	0.181373	0.00582445	1.75611	0.103281	0.318511	0.246699	0.00406566	1.46988	0.167836	0.362618
360	6.01	6.11	16.72	11.55	8.207	sp|O00151|PDLI1_HUMAN	PDZ and LIM domain protein 1 OS=Homo sapiens GN=PDLIM1 PE=1 SV=4	HUMAN	3	1.19006	0.337157	1.81856	0.654393	2.16419	1.18924	0.259416	1.61361	0.737005	1.91897
361	6	6.07	18.84	8.904	8.904	sp|Q07955-2|SRSF1_HUMAN	Isoform ASF-2 of Serine/arginine-rich splicing factor 1 OS=Homo sapiens GN=SRSF1	HUMAN	3	1.09844	0.525465	1.69875	0.646613	1.86597	1.10934	0.333944	1.42417	0.778942	1.57989
362	6	6.06	12.99	9.091	9.091	sp|P16083|NQO2_HUMAN	Ribosyldihydronicotinamide dehydrogenase [quinone] OS=Homo sapiens GN=NQO2 PE=1 SV=5	HUMAN	3	1.14309	0.439777	1.82515	0.6263	2.08631	0.974584	0.788384	1.43589	0.678732	1.39939
363	6	6.04	18.26	6.369	6.369	sp|P23381|SYWC_HUMAN	Tryptophan--tRNA ligase, cytoplasmic OS=Homo sapiens GN=WARS PE=1 SV=2	HUMAN	3	1.14763	0.395607	1.73722	0.660616	1.99368	2.31523	0.0094765	1.42501	1.62471	3.29924
364	6	6.01	16.79	9.16	9.16	sp|Q99536|VAT1_HUMAN	Synaptic vesicle membrane protein VAT-1 homolog OS=Homo sapiens GN=VAT1 PE=1 SV=2	HUMAN	3	0.753325	0.485629	31.1918	0.0241513	23.4976	1.24522	0.602057	47.5377	0.0261943	59.1947
365	6	6	20	18.33	18.33	sp|P24592|IBP6_HUMAN	Insulin-like growth factor-binding protein 6 OS=Homo sapiens GN=IGFBP6 PE=1 SV=1	HUMAN	3	0.757765	0.324303	7.1614	0.105812	5.42666	0.392306	0.20052	48.1227	0.0081522	18.8788
366	6	6	58.33	58.33	58.33	sp|P30047|GFRP_HUMAN	GTP cyclohydrolase 1 feedback regulatory protein OS=Homo sapiens GN=GCHFR PE=1 SV=3	HUMAN	3	0.803329	0.773825	1807.39	0.00044447	1451.92	1.62271	0.449674	190.175	0.00853273	308.598
367	5.91	6.09	17.28	12.31	9.287	sp|P53634|CATC_HUMAN	Dipeptidyl peptidase 1 OS=Homo sapiens GN=CTSC PE=1 SV=2	HUMAN	4	1.46003	0.175913	1.89608	0.770026	2.76834	1.51952	0.126589	1.82843	0.83105	2.77833
368	5.87	6.44	10.7	5.631	4.167	tr|E9PHP7|E9PHP7_HUMAN	Ectonucleotide pyrophosphatase/phosphodiesterase family member 2 OS=Homo sapiens GN=ENPP2 PE=4 SV=1	HUMAN	3	1.38336	0.467329	3.46892	0.398788	4.79878	1.03951	0.851979	1.83447	0.566654	1.90694
369	5.83	5.97	20.59	8.377	7.155	sp|P10809|CH60_HUMAN	60 kDa heat shock protein, mitochondrial OS=Homo sapiens GN=HSPD1 PE=1 SV=2	HUMAN	4	1.09019	0.663846	1.77185	0.615282	1.93164	1.22497	0.347957	1.78902	0.684713	2.1915
370	5.78	5.86	24.29	17.14	13.33	tr|Q5T9B7|Q5T9B7_HUMAN	Adenylate kinase OS=Homo sapiens GN=AK1 PE=2 SV=1	HUMAN	3	1.56124	0.140254	3.5523	0.439502	5.546	1.14593	0.402366	3.55129	0.322679	4.06952
371	5.75	7.13	27.19	22.36	14.5	sp|Q9Y266|NUDC_HUMAN	Nuclear migration protein nudC OS=Homo sapiens GN=NUDC PE=1 SV=1	HUMAN	5	1.37175	0.04965	1.37045	1.00095	1.87991	1.02149	0.927277	1.97845	0.516308	2.02096
372	5.66	5.74	42.12	24.66	23.29	tr|Q32Q12|Q32Q12_HUMAN	Nucleoside diphosphate kinase OS=Homo sapiens GN=NME1-NME2 PE=2 SV=1	HUMAN	3	1.46002	0.0732179	1.55972	0.936078	2.27722	0.752748	0.156937	1.61789	0.465264	1.21787
373	5.65	5.65	17.23	15.38	9.538	sp|Q96CX2|KCD12_HUMAN	BTB/POZ domain-containing protein KCTD12 OS=Homo sapiens GN=KCTD12 PE=1 SV=1	HUMAN	4	1.19977	0.533018	2.28208	0.525737	2.73798	1.13228	0.545453	1.78889	0.632949	2.02552
374	5.62	5.66	13.51	9.309	9.309	sp|P07711|CATL1_HUMAN	Cathepsin L1 OS=Homo sapiens GN=CTSL1 PE=1 SV=2	HUMAN	3	0.847824	0.226761	1.41409	0.599556	1.19889	1.53841	0.117766	1.87729	0.819485	2.88803
375	5.59	5.61	25.42	21.4	18.39	sp|O75636|FCN3_HUMAN	Ficolin-3 OS=Homo sapiens GN=FCN3 PE=1 SV=2	HUMAN	5	0.780279					1.10068
376	5.55	5.55	19.44	14.68	14.68	tr|G3V5Z7|G3V5Z7_HUMAN	Proteasome subunit alpha type OS=Homo sapiens GN=PSMA6 PE=3 SV=1	HUMAN	3	1.03527	0.911011	22.8689	0.0452695	23.6754	0.987788	0.978585	103.456	0.00954787	102.193
377	5.51	5.53	12.43	7.961	6.796	sp|P11413|G6PD_HUMAN	Glucose-6-phosphate 1-dehydrogenase OS=Homo sapiens GN=G6PD PE=1 SV=4	HUMAN	3	1.19311	0.395966	1.76583	0.675666	2.10684	1.85572	0.149378	2.77351	0.669088	5.14685
378	5.5	5.56	16.46	10.25	8.075	sp|P05089|ARGI1_HUMAN	Arginase-1 OS=Homo sapiens GN=ARG1 PE=1 SV=2	HUMAN	4	0.891158	0.452375	3.52538	0.252783	3.14167	0.902255	0.569266	5.09088	0.17723	4.59327
379	5.43	5.46	22.73	15.03	15.03	sp|P52907|CAZA1_HUMAN	F-actin-capping protein subunit alpha-1 OS=Homo sapiens GN=CAPZA1 PE=1 SV=3	HUMAN	4	0.896598					0.797185
380	5.42	5.65	27.78	15.61	14.29	sp|Q16543|CDC37_HUMAN	Hsp90 co-chaperone Cdc37 OS=Homo sapiens GN=CDC37 PE=1 SV=1	HUMAN	4	2.07155	0.129801	2.89344	0.715947	5.99389	2.41865	0.110043	3.31231	0.7302	8.01133
381	5.37	5.37	17.07	17.07	17.07	sp|A6NJ16|IV4F8_HUMAN	Putative V-set and immunoglobulin domain-containing-like protein IGHV4OR15-8 OS=Homo sapiens GN=IGHV4OR15-8 PE=5 SV=2	HUMAN	5	0.118357					0.2453
382	5.31	5.41	13.66	8.729	7.211	sp|O60506-4|HNRPQ_HUMAN	Isoform 4 of Heterogeneous nuclear ribonucleoprotein Q OS=Homo sapiens GN=SYNCRIP	HUMAN	3	0.798978	0.469725	2.37575	0.336306	1.89817	0.894268	0.772661	3.08028	0.290321	2.75459
383	5.19	5.38	46.57	13.73	10.78	tr|B4DUI3|B4DUI3_HUMAN	Eukaryotic translation initiation factor 3 subunit J OS=Homo sapiens GN=EIF3J PE=2 SV=1	HUMAN	3	1.32939	0.0761816	1.43189	0.928412	1.90354	1.71486	0.0480279	1.69521	1.0116	2.90704
384	5.17	5.29	16.18	8.937	7.246	sp|O75874|IDHC_HUMAN	Isocitrate dehydrogenase [NADP] cytoplasmic OS=Homo sapiens GN=IDH1 PE=1 SV=2	HUMAN	3	2.41922					3.78918
385	5.07	5.14	25.98	20.47	11.81	tr|D6RHI9|D6RHI9_HUMAN	Ribonuclease T2 (Fragment) OS=Homo sapiens GN=RNASET2 PE=3 SV=1	HUMAN	3	0.872734	0.680353	2.59365	0.336489	2.26356	1.554	0.380819	3.92984	0.395436	6.10697
386	5.05	5.08	22.35	11.73	11.73	tr|F5H7Y6|F5H7Y6_HUMAN	Ras-related protein Rap-1b OS=Homo sapiens GN=RAP1B PE=4 SV=1	HUMAN	3	0.960997	0.829916	6.33977	0.151582	6.0925	1.45006	0.486237	91.9936	0.0157626	133.396
387	5	5.01	25.34	25.34	25.34	sp|Q9NZT1|CALL5_HUMAN	Calmodulin-like protein 5 OS=Homo sapiens GN=CALML5 PE=1 SV=2	HUMAN	4
388	4.99	5.06	11.31	7.407	5.068	tr|B3KUE5|B3KUE5_HUMAN	Phospholipid transfer protein OS=Homo sapiens GN=PLTP PE=2 SV=1	HUMAN	2	1.38206	0.363119	13.978	0.0988743	19.3184	0.818892	0.338784	4.45861	0.183665	3.65112
389	4.97	5.01	7.152	4.727	1.939	sp|Q00839|HNRPU_HUMAN	Heterogeneous nuclear ribonucleoprotein U OS=Homo sapiens GN=HNRNPU PE=1 SV=6	HUMAN	2	1.28306	0.134682	1.44747	0.886415	1.85719	1.4349	0.0766703	1.52597	0.940318	2.18962
390	4.94	5.01	27.72	13.73	10.36	tr|B7ZKW8|B7ZKW8_HUMAN	CapZ-interacting protein OS=Homo sapiens GN=RCSD1 PE=2 SV=1	HUMAN	4	1.15439	0.253377	1.3827	0.834878	1.59618	1.57869	0.0689263	1.68609	0.936304	2.66182
391	4.91	4.97	10.5	7.16	7.16	sp|P16930|FAAA_HUMAN	Fumarylacetoacetase OS=Homo sapiens GN=FAH PE=1 SV=2	HUMAN	3	1.46159	0.327095	15.2029	0.0961389	22.2205	1.38766	0.492693	58.4516	0.0237402	81.1107
392	4.91	4.92	12.85	9.431	4.228	sp|P00748|FA12_HUMAN	Coagulation factor XII OS=Homo sapiens GN=F12 PE=1 SV=3	HUMAN	2	0.361843	0.00783745	1.77122	0.20429	0.640903	0.337207	0.0746907	3.52378	0.0956948	1.18824
393	4.88	4.89	15.32	11.69	11.69	sp|P11226|MBL2_HUMAN	Mannose-binding protein C OS=Homo sapiens GN=MBL2 PE=1 SV=2	HUMAN	3	0.546031	0.282288	38.535	0.0141697	21.0413	0.683834	0.2332	6.37538	0.107262	4.3597
394	4.88	4.88	14.52	9.241	9.241	tr|B7Z5W1|B7Z5W1_HUMAN	Junctional adhesion molecule A OS=Homo sapiens GN=F11R PE=2 SV=1	HUMAN	3	1.0354	0.854453	6.6824	0.154944	6.91895	1.07545	0.845577	41.8961	0.0256695	45.0572
395	4.87	5.9	20.21	20.21	17.73	sp|Q9UBX7|KLK11_HUMAN	Kallikrein-11 OS=Homo sapiens GN=KLK11 PE=1 SV=2	HUMAN	7	3.34267	0.00497581	1.44436	2.31429	4.82801	4.65991	0.0350759	3.57522	1.30339	16.6602
396	4.84	7.9	56.94	38.28	20.57	sp|P26583|HMGB2_HUMAN	High mobility group protein B2 OS=Homo sapiens GN=HMGB2 PE=1 SV=2	HUMAN	4	1.33555	0.19372	1.67331	0.798148	2.23479	1.4919	0.0561104	1.51702	0.983441	2.26324
397	4.84	5.67	31.56	17.78	15.11	sp|P24534|EF1B_HUMAN	Elongation factor 1-beta OS=Homo sapiens GN=EEF1B2 PE=1 SV=3	HUMAN	4	1.29752	0.20578	1.61463	0.803598	2.09501	1.23492	0.0379899	1.21165	1.0192	1.49628
398	4.79	4.91	23.46	18.46	13.85	sp|P00918|CAH2_HUMAN	Carbonic anhydrase 2 OS=Homo sapiens GN=CA2 PE=1 SV=2	HUMAN	3	0.630101	0.135416	3.55193	0.177397	2.23807	0.936642	0.632754	3.58982	0.260916	3.36238
399	4.71	4.71	14.5	6.397	6.397	sp|P27918|PROP_HUMAN	Properdin OS=Homo sapiens GN=CFP PE=1 SV=2	HUMAN	3	0.743104	0.207905	3.58878	0.207063	2.66684	0.724991	0.324691	9.83328	0.0737283	7.12904
400	4.68	4.84	8.602	2.542	2.542	tr|F5H3A1|F5H3A1_HUMAN	Sodium/potassium-transporting ATPase subunit alpha-1 OS=Homo sapiens GN=ATP1A1 PE=3 SV=1	HUMAN	3	0.692118	0.478594	6.24922	0.110753	4.32519	1.48458	0.195507	2.42938	0.611094	3.60662
401	4.68	4.7	35.48	31.45	22.58	tr|F8WEU4|F8WEU4_HUMAN	Cytochrome b5 OS=Homo sapiens GN=CYB5A PE=3 SV=1	HUMAN	3	0.0651264					0.183929
402	4.66	4.75	36.2	22.09	22.09	tr|B4DPJ6|B4DPJ6_HUMAN	Tumor protein D54 OS=Homo sapiens GN=TPD52L2 PE=2 SV=1	HUMAN	3	0.661703	0.628792	11.5739	0.0571721	7.65847	0.698237	0.0328258	1.35493	0.515331	0.946061
403	4.66	4.66	12.45	12.45	7.004	sp|P15328|FOLR1_HUMAN	Folate receptor alpha OS=Homo sapiens GN=FOLR1 PE=1 SV=3	HUMAN	3	2.82319	0.214453	101.317	0.0278648	286.037	2.16968	0.14133	9.22124	0.235292	20.0072
404	4.63	19.02	58.9	51.6	41.55	sp|P10412|H14_HUMAN	Histone H1.4 OS=Homo sapiens GN=HIST1H1E PE=1 SV=2	HUMAN	17	1.453	0.166455	2.12434	0.683976	3.08666	2.22844	0.116428	3.64079	0.612075	8.11328
405	4.62	4.69	14.05	10.13	10.13	sp|Q9H098-2|F107B_HUMAN	Isoform 2 of Protein FAM107B OS=Homo sapiens GN=FAM107B	HUMAN	4	1.44783	0.35627	19.0205	0.0761195	27.5384	2.10823	0.0888447	3.78559	0.55691	7.98092
406	4.62	4.63	12.03	10.6	10.6	sp|P31997|CEAM8_HUMAN	Carcinoembryonic antigen-related cell adhesion molecule 8 OS=Homo sapiens GN=CEACAM8 PE=1 SV=2	HUMAN	4	1.39121	0.285771	7.54416	0.18441	10.4955	1.85723	0.101593	3.54684	0.523631	6.58731
407	4.61	4.74	24.75	9.571	7.591	tr|B4DTC3|B4DTC3_HUMAN	Heterogeneous nuclear ribonucleoprotein D0 OS=Homo sapiens GN=HNRNPD PE=2 SV=1	HUMAN	2	2.35352	0.425481	5359.79	0.000439108	12614.4	1.87433	0.210469	15.4811	0.121072	29.0167
408	4.59	4.63	13.35	8.686	4.237	tr|H3BVD9|H3BVD9_HUMAN	Kunitz-type protease inhibitor 1 (Fragment) OS=Homo sapiens GN=SPINT1 PE=4 SV=1	HUMAN	2	1.08329	0.673877	2.025	0.534955	2.19366	0.862486	0.47466	2.07314	0.416029	1.78805
409	4.57	4.57	12.96	12.96	11.42	sp|P67809|YBOX1_HUMAN	Nuclease-sensitive element-binding protein 1 OS=Homo sapiens GN=YBX1 PE=1 SV=3	HUMAN	4	0.66395	0.591599	1061.12	0.000625707	704.53	1.39262	0.598399	317.781	0.00438232	442.548
410	4.55	5.21	66.36	43.64	33.64	sp|P81605|DCD_HUMAN	Dermcidin OS=Homo sapiens GN=DCD PE=1 SV=2	HUMAN	3	0.42415	0.0760572	3.69937	0.114655	1.56909	0.43214	0.0777558	3.70084	0.116768	1.59928
411	4.54	4.82	14.83	7.815	7.337	tr|B4DGP8|B4DGP8_HUMAN	Calnexin OS=Homo sapiens GN=CANX PE=2 SV=1	HUMAN	4	1.74934	0.304261	5.79358	0.301944	10.1349	3.90183	0.0812347	5.9302	0.65796	23.1387
412	4.53	6.66	82.54	73.02	60.32	tr|C9J0E4|C9J0E4_HUMAN	Cystatin-A OS=Homo sapiens GN=CSTA PE=4 SV=1	HUMAN	4	1.92887	0.0475889	1.89596	1.01736	3.65705	0.960227	0.798135	1.82056	0.527434	1.74815
413	4.49	4.7	25.85	17.35	8.503	sp|P06748|NPM_HUMAN	Nucleophosmin OS=Homo sapiens GN=NPM1 PE=1 SV=2	HUMAN	5	1.15076	0.247635	1.45367	0.791622	1.67282	1.26628	0.209579	1.74488	0.72571	2.2095
414	4.47	4.51	33.33	25	19.44	sp|P62942|FKB1A_HUMAN	Peptidyl-prolyl cis-trans isomerase FKBP1A OS=Homo sapiens GN=FKBP1A PE=1 SV=2	HUMAN	2	1.55305	0.438506	100.007	0.0155295	155.315	1.44445	0.283235	9.27881	0.155672	13.4028
415	4.46	4.46	20.47	17.21	17.21	tr|C9JF17|C9JF17_HUMAN	Apolipoprotein D (Fragment) OS=Homo sapiens GN=APOD PE=4 SV=1	HUMAN	3	0.262104	0.047228	3.54125	0.0740145	0.928175	0.391148	0.0997135	6.57654	0.0594762	2.5724
416	4.44	9.02	33.48	22.6	15.99	sp|P08729|K2C7_HUMAN	Keratin, type II cytoskeletal 7 OS=Homo sapiens GN=KRT7 PE=1 SV=5	HUMAN	10	1.65921	0.133047	3.91366	0.423954	6.49359	0.875965	0.463187	4.47491	0.19575	3.91987
417	4.4	4.51	35.84	19.65	15.03	tr|J3KNB4|J3KNB4_HUMAN	Antibacterial protein LL-37 OS=Homo sapiens GN=CAMP PE=4 SV=1	HUMAN	3	1.11904	0.693909	2.28299	0.490164	2.55475	1.48494	0.157524	1.95639	0.759023	2.90512
418	4.38	4.41	35.08	18.85	18.85	sp|P60953|CDC42_HUMAN	Cell division control protein 42 homolog OS=Homo sapiens GN=CDC42 PE=1 SV=2	HUMAN	4	1.55118	0.260794	3.37706	0.459327	5.23842	3.38054	0.201465	16.3416	0.206867	55.2436
419	4.34	4.38	13.81	5.959	4.07	sp|P09871|C1S_HUMAN	Complement C1s subcomponent OS=Homo sapiens GN=C1S PE=1 SV=1	HUMAN	3	0.771051	0.0665708	1.33428	0.57788	1.02879	0.823104	0.596788	2.56437	0.320977	2.11074
420	4.3	6.62	34.38	25.35	11.46	sp|P27105|STOM_HUMAN	Erythrocyte band 7 integral membrane protein OS=Homo sapiens GN=STOM PE=1 SV=3	HUMAN	5	1.07243	0.874787	86.3825	0.0124149	92.6389	2.04261	0.407893	868.556	0.00235173	1774.12
421	4.28	4.3	29.13	23.48	16.09	sp|P15941-6|MUC1_HUMAN	Isoform 6 of Mucin-1 OS=Homo sapiens GN=MUC1	HUMAN	3	1.38007	0.411856	2.93905	0.469564	4.05609	1.59508	0.301151	3.29451	0.484162	5.25501
422	4.26	12.18	39.9	32.32	27.27	sp|P32119|PRDX2_HUMAN	Peroxiredoxin-2 OS=Homo sapiens GN=PRDX2 PE=1 SV=5	HUMAN	9	0.666787	0.0120966	1.26664	0.526423	0.844577	0.577017	0.218842	3.09136	0.186655	1.78377
423	4.26	4.38	6.846	2.2	1.32	sp|O00468|AGRIN_HUMAN	Agrin OS=Homo sapiens GN=AGRN PE=1 SV=4	HUMAN	2	0.72259	0.474503	4.95594	0.145803	3.58111	0.483197	0.230152	6.26308	0.0771501	3.0263
424	4.24	4.33	26.84	15.81	13.6	tr|F2Z2Y4|F2Z2Y4_HUMAN	Pyridoxal kinase OS=Homo sapiens GN=PDXK PE=4 SV=1	HUMAN	3	1.61936	0.16408	2.61952	0.61819	4.24195	0.94048	0.808261	2.60054	0.361648	2.44576
425	4.22	4.5	8.637	1.601	0.7763	sp|Q9NZM1|MYOF_HUMAN	Myoferlin OS=Homo sapiens GN=MYOF PE=1 SV=1	HUMAN	2	1.25174	0.407327	2.53063	0.494639	3.1677	1.29921	0.088254	1.43163	0.907508	1.85999
426	4.22	4.24	24.39	16.59	12.2	sp|Q9Y5Z4|HEBP2_HUMAN	Heme-binding protein 2 OS=Homo sapiens GN=HEBP2 PE=1 SV=1	HUMAN	2	1.1222	0.145745	1.19424	0.939673	1.34017	1.00961	0.914246	1.26046	0.800981	1.27257
427	4.16	8.49	17.42	6.452	4.355	tr|J9JID7|J9JID7_HUMAN	Lamin B2, isoform CRA_a OS=Homo sapiens GN=LMNB2 PE=3 SV=1	HUMAN	5	1.48498	0.381166	4.60502	0.32247	6.83838	1.20747	0.155335	1.4384	0.839455	1.73682
428	4.16	4.47	11.37	4.102	2.797	sp|P11047|LAMC1_HUMAN	Laminin subunit gamma-1 OS=Homo sapiens GN=LAMC1 PE=1 SV=3	HUMAN	3	0.91853	0.561738	3.71542	0.247221	3.41272	0.574933	0.116169	3.66112	0.157038	2.1049
429	4.16	4.34	25	17.34	12.5	sp|O14818|PSA7_HUMAN	Proteasome subunit alpha type-7 OS=Homo sapiens GN=PSMA7 PE=1 SV=1	HUMAN	3	0.770736	0.392606	10.4409	0.0738186	8.04721	1.48616	0.402545	39.9772	0.0371753	59.4125
430	4.15	6.39	63.79	63.79	45.69	sp|P01781|HV320_HUMAN	Ig heavy chain V-III region GAL OS=Homo sapiens PE=1 SV=1	HUMAN	10	0.137637	0.135734	233.999	0.000588198	32.2069	0.237942	0.150917	82.0561	0.00289975	19.5246
431	4.15	5.73	18.16	10.67	5.243	tr|F5H5M6|F5H5M6_HUMAN	Hyaluronan-binding protein 2 OS=Homo sapiens GN=HABP2 PE=3 SV=1	HUMAN	3	0.417076	0.000141607	1.24133	0.33599	0.517731	0.35889	0.0308018	2.42083	0.148251	0.868812
432	4.15	4.22	28.83	24.77	10.36	sp|P04179|SODM_HUMAN	Superoxide dismutase [Mn], mitochondrial OS=Homo sapiens GN=SOD2 PE=1 SV=2	HUMAN	2	0.631552	0.160491	2.47201	0.255481	1.5612	1.04463	0.872673	2.81479	0.371121	2.94041
433	4.14	4.16	15.46	12.3	10.41	sp|P12318|FCG2A_HUMAN	Low affinity immunoglobulin gamma Fc region receptor II-a OS=Homo sapiens GN=FCGR2A PE=1 SV=4	HUMAN	3	1.3947					0.946737
434	4.12	4.29	8.975	3.291	2.319	sp|Q12913|PTPRJ_HUMAN	Receptor-type tyrosine-protein phosphatase eta OS=Homo sapiens GN=PTPRJ PE=1 SV=3	HUMAN	2	0.524151					0.929605
435	4.12	4.24	33.78	23.65	14.86	sp|O60869|EDF1_HUMAN	Endothelial differentiation-related factor 1 OS=Homo sapiens GN=EDF1 PE=1 SV=1	HUMAN	2	1.31954	0.0851318	1.45113	0.909323	1.91482	1.17805	0.343766	1.77407	0.664039	2.08994
436	4.12	4.12	15.83	13.75	11.25	sp|P08294|SODE_HUMAN	Extracellular superoxide dismutase [Cu-Zn] OS=Homo sapiens GN=SOD3 PE=1 SV=2	HUMAN	2	0.640876	0.580525	1480.94	0.000432748	949.101	0.578914	0.334809	56.3316	0.0102769	32.6112
437	4.11	6.13	34.62	30.77	25.38	sp|P06316|LV107_HUMAN	Ig lambda chain V-I region BL2 OS=Homo sapiens PE=2 SV=1	HUMAN	9	0.150048	0.0166807	2.90824	0.0515942	0.436375	0.220203	0.0100669	1.93148	0.114007	0.425318
438	4.11	4.12	19.7	7.955	7.955	sp|P61247|RS3A_HUMAN	40S ribosomal protein S3a OS=Homo sapiens GN=RPS3A PE=1 SV=2	HUMAN	2	1.14024	0.632327	2.74567	0.415288	3.13074	2.09579	0.0959606	2.89938	0.722841	6.07648
439	4.1	10.8	84.09	84.09	77.27	sp|P63313|TYB10_HUMAN	Thymosin beta-10 OS=Homo sapiens GN=TMSB10 PE=1 SV=2	HUMAN	16	3.15851	0.229818	248.909	0.0126894	786.182	5.54268	0.180754	572.177	0.009687	3171.39
440	4.09	6.17	67.86	41.67	34.52	tr|E9PS38|E9PS38_HUMAN	Protein NEDD8-MDP1 OS=Homo sapiens GN=NEDD8-MDP1 PE=4 SV=1	HUMAN	4	1.77273	0.109605	3.5429	0.50036	6.28061	1.08663	0.779193	18.5538	0.0585668	20.1612
441	4.09	4.25	19.06	12.23	11.87	sp|Q9BT09|CNPY3_HUMAN	Protein canopy homolog 3 OS=Homo sapiens GN=CNPY3 PE=1 SV=1	HUMAN	3	1.14402	0.423694	3.82673	0.298954	4.37784	2.24617	0.480249	15725.7	0.000142835	35322.5
442	4.09	4.1	25.41	12.3	12.3	sp|Q15848|ADIPO_HUMAN	Adiponectin OS=Homo sapiens GN=ADIPOQ PE=1 SV=1	HUMAN	2	0.251529					0.286732
443	4.08	4.27	10.24	4.654	4.654	sp|P15144|AMPN_HUMAN	Aminopeptidase N OS=Homo sapiens GN=ANPEP PE=1 SV=4	HUMAN	3	0.358687	0.479333	200386	1.78999e-06	71875.8	0.318466	0.42863	108708	2.92956e-06	34619.6
444	4.08	4.14	14.47	8.421	6.316	tr|E9PF24|E9PF24_HUMAN	Apolipoprotein L1 OS=Homo sapiens GN=APOL1 PE=4 SV=1	HUMAN	3	0.712366					0.347531
445	4.07	4.29	19.16	7.612	7.612	sp|P49908|SEPP1_HUMAN	Selenoprotein P OS=Homo sapiens GN=SEPP1 PE=1 SV=3	HUMAN	3	0.368955	0.0236008	1.9563	0.188598	0.721789	0.257876	0.00423267	1.46319	0.176243	0.377321
446	4.07	4.21	24.07	7.944	6.542	tr|Q5T6W5|Q5T6W5_HUMAN	Heterogeneous nuclear ribonucleoprotein K OS=Homo sapiens GN=HNRNPK PE=2 SV=1	HUMAN	3	1.8024	0.118279	4.08346	0.44139	7.36	1.13823	0.743017	47.0707	0.0241813	53.5774
447	4.07	4.19	20.13	7.468	4.87	tr|E7EX17|E7EX17_HUMAN	Uncharacterized protein OS=Homo sapiens GN=EIF4B PE=4 SV=1	HUMAN	2	0.977933	0.816277	1.43801	0.680059	1.40628	1.18623	0.789712	11.1984	0.105928	13.2839
448	4.07	4.17	22.08	7.421	7.421	tr|F5H0W4|F5H0W4_HUMAN	Bridging integrator 2 OS=Homo sapiens GN=BIN2 PE=4 SV=1	HUMAN	3	2.01075					3.9315
449	4.07	4.16	21.62	10.04	10.04	tr|J3KN86|J3KN86_HUMAN	40S ribosomal protein S3 OS=Homo sapiens GN=RPS3 PE=3 SV=1	HUMAN	2	2.2695	0.228685	7.82756	0.289937	17.7647	1.14116	0.791148	6.56183	0.173908	7.48809
450	4.07	4.14	29.8	16.56	12.58	tr|B1AKZ3|B1AKZ3_HUMAN	Astrocytic phosphoprotein PEA-15 OS=Homo sapiens GN=PEA15 PE=2 SV=1	HUMAN	3	1.12967	0.634297	2.08615	0.541509	2.35667	1.19344	0.591274	2.55769	0.466609	3.05245
451	4.07	4.13	46.3	38.89	38.89	sp|P01608|KV116_HUMAN	Ig kappa chain V-I region Roy OS=Homo sapiens PE=1 SV=1	HUMAN	14	0.14814					0.194723
452	4.06	4.15	22.1	10.72	7.877	sp|Q13451|FKBP5_HUMAN	Peptidyl-prolyl cis-trans isomerase FKBP5 OS=Homo sapiens GN=FKBP5 PE=1 SV=2	HUMAN	2	0.61528	0.154342	4.60031	0.133747	2.83048	1.04363	0.742029	3.54294	0.294566	3.69752
453	4.06	4.15	22.52	11.26	8.559	sp|O43633|CHM2A_HUMAN	Charged multivesicular body protein 2a OS=Homo sapiens GN=CHMP2A PE=1 SV=1	HUMAN	2	0.839381					1.72462
454	4.05	4.22	7.35	2.227	2.227	tr|G5E9M5|G5E9M5_HUMAN	Interleukin enhancer binding factor 3, 90kDa, isoform CRA_b OS=Homo sapiens GN=ILF3 PE=4 SV=1	HUMAN	2	1.24896	0.519819	20.2111	0.0617956	25.2428	1.17997	0.342981	3.51426	0.335765	4.14671
455	4.05	4.06	11.97	5.882	4.462	sp|Q12805|FBLN3_HUMAN	EGF-containing fibulin-like extracellular matrix protein 1 OS=Homo sapiens GN=EFEMP1 PE=1 SV=2	HUMAN	2	1.06457	0.728352	1.963	0.542318	2.08974	0.611849	0.698525	113.016	0.00541383	69.1488
456	4.05	4.06	6.977	4.07	4.07	tr|F5H3W1|F5H3W1_HUMAN	Podocalyxin OS=Homo sapiens GN=PODXL PE=4 SV=1	HUMAN	2	1.91561	0.0811329	2.33802	0.819332	4.47874	1.97135	0.165012	3.89989	0.505489	7.68805
457	4.04	4.33	8.71	2.743	1.444	tr|E9PAV3|E9PAV3_HUMAN	Nascent polypeptide-associated complex subunit alpha OS=Homo sapiens GN=NACA PE=4 SV=1	HUMAN	2	0.784426					0.975761
458	4.04	4.05	8.176	5.031	5.031	sp|P27695|APEX1_HUMAN	DNA-(apurinic or apyrimidinic site) lyase OS=Homo sapiens GN=APEX1 PE=1 SV=2	HUMAN	2	0.594247					1.15934
459	4.04	4.04	9.355	9.355	9.355	sp|P18827|SDC1_HUMAN	Syndecan-1 OS=Homo sapiens GN=SDC1 PE=1 SV=3	HUMAN	3	1.39315					0.822026
460	4.03	4.13	8.342	2.925	1.625	sp|O14786|NRP1_HUMAN	Neuropilin-1 OS=Homo sapiens GN=NRP1 PE=1 SV=3	HUMAN	2	0.867326	0.553072	2.37949	0.3645	2.0638	0.427794	0.0632738	2.62612	0.1629	1.12344
461	4.03	4.1	17.65	7.721	7.721	sp|P24593|IBP5_HUMAN	Insulin-like growth factor-binding protein 5 OS=Homo sapiens GN=IGFBP5 PE=1 SV=1	HUMAN	3	1.12892	0.715856	3.47286	0.325069	3.92058	1.71255	0.334697	6.27685	0.272836	10.7494
462	4.02	9.62	18.96	9.514	5.466	sp|P20742|PZP_HUMAN	Pregnancy zone protein OS=Homo sapiens GN=PZP PE=1 SV=4	HUMAN	7	0.503081	0.46744	27.7196	0.018149	13.9452	0.800922	0.778122	19.46	0.0411572	15.586
463	4.02	6.7	57.26	53.85	39.32	sp|P01764|HV303_HUMAN	Ig heavy chain V-III region VH26 OS=Homo sapiens PE=1 SV=1	HUMAN	21	0.204397					0.352377
464	4.02	4.4	12.23	7.524	2.351	tr|F8W8S0|F8W8S0_HUMAN	Cytoplasmic dynein 1 intermediate chain 2 OS=Homo sapiens GN=DYNC1I2 PE=4 SV=1	HUMAN	2	1.02988	0.921785	20.69	0.0497767	21.3083	1.19747	0.693218	79.6718	0.01503	95.4043
465	4.02	4.17	18.91	16.81	10.5	tr|F5GX11|F5GX11_HUMAN	Proteasome subunit alpha type-1 OS=Homo sapiens GN=PSMA1 PE=4 SV=1	HUMAN	2	1.15266	0.398625	3.68993	0.31238	4.25325	1.9789	0.298075	80.3032	0.0246428	158.912
466	4.02	4.1	19.06	10.25	5.123	tr|B5MCQ5|B5MCQ5_HUMAN	Protein disulfide-isomerase A6 OS=Homo sapiens GN=PDIA6 PE=3 SV=1	HUMAN	2	1.29167	0.539254	39.6412	0.032584	51.2033	1.27852	0.379965	8.34268	0.15325	10.6663
467	4.01	5.21	19.35	9.677	9.677	sp|P09496|CLCA_HUMAN	Clathrin light chain A OS=Homo sapiens GN=CLTA PE=1 SV=1	HUMAN	4	0.862741	0.485846	6.0153	0.143425	5.18964	1.06746	0.673511	4.36286	0.244671	4.65719
468	4.01	4.27	21.26	6.934	3.236	sp|A0MZ66-3|SHOT1_HUMAN	Isoform 3 of Shootin-1 OS=Homo sapiens GN=KIAA1598	HUMAN	2	1.16366	0.146659	1.28103	0.908372	1.49068	1.2014	0.2286	1.47271	0.815779	1.76931
469	4.01	4.1	23.69	12.05	12.05	sp|Q06323|PSME1_HUMAN	Proteasome activator complex subunit 1 OS=Homo sapiens GN=PSME1 PE=1 SV=1	HUMAN	6	1.10146	0.845781	143.881	0.00765532	158.479	1.47848	0.658751	4287.31	0.000344851	6338.73
470	4.01	4.07	29.41	29.41	23.53	sp|P20962|PTMS_HUMAN	Parathymosin OS=Homo sapiens GN=PTMS PE=1 SV=2	HUMAN	2	0.759714	0.261547	4.5773	0.165974	3.47744	1.10598	0.557962	4.65092	0.237798	5.14381
471	4	51.66	39.36	36.17	32.58	sp|P06681|CO2_HUMAN	Complement C2 OS=Homo sapiens GN=C2 PE=1 SV=2	HUMAN	28
472	4	6.22	36.51	36.51	27.78	sp|P01772|HV311_HUMAN	Ig heavy chain V-III region KOL OS=Homo sapiens PE=1 SV=1	HUMAN	11
473	4	4.2	8.175	2.912	2.24	sp|Q14764|MVP_HUMAN	Major vault protein OS=Homo sapiens GN=MVP PE=1 SV=4	HUMAN	2	1.38341	0.509699	70.2006	0.0197065	97.1162	1.73639	0.122875	3.93658	0.44109	6.83544
474	4	4.13	15.67	8.955	8.955	tr|Q5VXV2|Q5VXV2_HUMAN	Protein SET OS=Homo sapiens GN=SET PE=2 SV=2	HUMAN	2	1.0332	0.801963	3.63596	0.284163	3.75669	0.739337	0.202446	3.53642	0.209064	2.6146
475	4	4.08	12.39	7.606	7.606	tr|B7Z1Z5|B7Z1Z5_HUMAN	Neurotrimin OS=Homo sapiens GN=NTM PE=2 SV=1	HUMAN	2	1.5243	0.743325	283938	5.36842e-06	432805	0.976506	0.869069	4.25468	0.229513	4.15472
476	4	4.06	14.12	4.706	4.706	sp|P29350|PTN6_HUMAN	Tyrosine-protein phosphatase non-receptor type 6 OS=Homo sapiens GN=PTPN6 PE=1 SV=1	HUMAN	2	0.779165	0.804817	22364	3.48401e-05	17425.2	1.91395	0.455373	1294.69	0.00147831	2477.98
477	4	4.06	8.205	1.624	1.624	sp|P07996|TSP1_HUMAN	Thrombospondin-1 OS=Homo sapiens GN=THBS1 PE=1 SV=2	HUMAN	2	0.631113					0.538029
478	4	4.02	7.377	4.098	4.098	sp|P00742|FA10_HUMAN	Coagulation factor X OS=Homo sapiens GN=F10 PE=1 SV=2	HUMAN	2	0.294665					0.405326
479	4	4.02	25.34	19.18	15.07	sp|P06331|HV209_HUMAN	Ig heavy chain V-II region ARH-77 OS=Homo sapiens PE=4 SV=1	HUMAN	6	0.179884					0.337516
480	4	4.02	21.69	16.87	16.87	sp|P48304|REG1B_HUMAN	Lithostathine-1-beta OS=Homo sapiens GN=REG1B PE=1 SV=1	HUMAN	3	0.100585					0.558038
481	4	4.01	15.31	9.524	9.524	sp|P49788|TIG1_HUMAN	Retinoic acid receptor responder protein 1 OS=Homo sapiens GN=RARRES1 PE=2 SV=2	HUMAN	2	0.839134					1.01054
482	4	4.01	36.14	31.33	31.33	sp|P02654|APOC1_HUMAN	Apolipoprotein C-I OS=Homo sapiens GN=APOC1 PE=1 SV=1	HUMAN	3	0.385743					0.430995
483	4	4	4.601	3.221	3.221	sp|Q9NPY3|C1QR1_HUMAN	Complement component C1q receptor OS=Homo sapiens GN=CD93 PE=1 SV=3	HUMAN	2	0.397624	0.422844	9639.3	4.12503e-05	3832.82	0.241234	0.207443	448.099	0.000538349	108.097
484	4	4	16.52	13.84	13.84	sp|Q96BQ1|FAM3D_HUMAN	Protein FAM3D OS=Homo sapiens GN=FAM3D PE=1 SV=1	HUMAN	2	1.04905	0.719462	3.63335	0.288728	3.81157	2.68519	0.0651298	3.62724	0.740285	9.73984
485	4	4	25	25	25	sp|P04155|TFF1_HUMAN	Trefoil factor 1 OS=Homo sapiens GN=TFF1 PE=1 SV=1	HUMAN	2	2.00695					0.616972
486	4	4	6.593	6.593	6.593	tr|F6SYF8|F6SYF8_HUMAN	Dickkopf-related protein 3 OS=Homo sapiens GN=DKK3 PE=4 SV=1	HUMAN	3	0.950336	0.773968	5.73001	0.165852	5.44543	0.420529	0.155616	15.5697	0.0270094	6.54753
487	3.98	4.02	10.64	5.201	4.019	sp|Q96IY4|CBPB2_HUMAN	Carboxypeptidase B2 OS=Homo sapiens GN=CPB2 PE=1 SV=2	HUMAN	2	0.758946	0.223101	3.60045	0.210792	2.73254	0.577667	0.24713	17.3111	0.0333697	10.0001
488	3.97	14.9	39.27	29.15	22.67	sp|P61981|1433G_HUMAN	14-3-3 protein gamma OS=Homo sapiens GN=YWHAG PE=1 SV=2	HUMAN	12	1.61301	0.382332	64.1375	0.0251492	103.455	1.15564	0.620704	15.0435	0.0768196	17.3849
489	3.97	4.03	42.06	34.58	34.58	sp|P01717|LV403_HUMAN	Ig lambda chain V-IV region Hil OS=Homo sapiens PE=1 SV=1	HUMAN	6	0.287269					0.385036
490	3.95	3.98	17.61	10.38	6.604	tr|G5EA09|G5EA09_HUMAN	Syndecan binding protein (Syntenin), isoform CRA_a OS=Homo sapiens GN=SDCBP PE=4 SV=1	HUMAN	2	1.15116	0.362797	1.67877	0.685719	1.93254	0.639597	0.0347578	1.44513	0.442588	0.924299
491	3.92	3.93	7.848	5.157	3.812	tr|H0Y8K2|H0Y8K2_HUMAN	Uncharacterized protein (Fragment) OS=Homo sapiens PE=3 SV=1	HUMAN	2	0.796719					0.873882
492	3.91	3.98	6.463	5.102	2.608	sp|P12830|CADH1_HUMAN	Cadherin-1 OS=Homo sapiens GN=CDH1 PE=1 SV=3	HUMAN	2	1.20809	0.0868227	1.27063	0.950783	1.53504	0.794301	0.248146	1.66953	0.475765	1.32611
493	3.9	4.21	8.609	2.202	1.702	sp|Q12866|MERTK_HUMAN	Tyrosine-protein kinase Mer OS=Homo sapiens GN=MERTK PE=1 SV=2	HUMAN	2	1.18886					0.633813
494	3.89	3.91	19.35	9.946	9.946	tr|J3QK90|J3QK90_HUMAN	NSFL1 cofactor p47 OS=Homo sapiens GN=NSFL1C PE=4 SV=1	HUMAN	3	0.684537	0.165163	2.13921	0.319995	1.46437	0.753725	0.0729429	1.41609	0.532256	1.06734
495	3.89	3.91	9.028	5.093	5.093	tr|I3NI00|I3NI00_HUMAN	Basigin OS=Homo sapiens GN=BSG PE=4 SV=1	HUMAN	2	1.01152					1.44223
496	3.85	3.87	29.02	24.11	15.63	sp|CASB_BOVIN			3	1.57774	0.763796	301.168	0.00523872	475.164	1.475	0.866981	6708.73	0.000219863	9895.37
497	3.82	4.29	10.67	5.618	3.184	sp|Q9H4M9|EHD1_HUMAN	EH domain-containing protein 1 OS=Homo sapiens GN=EHD1 PE=1 SV=2	HUMAN	2	1.89401	0.198893	13.7523	0.137722	26.047	1.92247	0.291115	59.5331	0.0322926	114.451
498	3.8	7.96	49.61	45.74	27.91	sp|P18136|KV313_HUMAN	Ig kappa chain V-III region HIC OS=Homo sapiens PE=2 SV=2	HUMAN	11	0.185039					0.225743
499	3.75	4.83	25.94	21.7	13.21	tr|E7EWS7|E7EWS7_HUMAN	Ubiquitin-conjugating enzyme E2 L3 OS=Homo sapiens GN=UBE2L3 PE=3 SV=1	HUMAN	3	1.86643	0.102117	2.53691	0.73571	4.73497	1.97501	0.0649204	2.19222	0.900917	4.32966
500	3.71	3.82	8.991	4.404	4.404	sp|P22792|CPN2_HUMAN	Carboxypeptidase N subunit 2 OS=Homo sapiens GN=CPN2 PE=1 SV=3	HUMAN	2	0.591662	0.201053	8.83643	0.0669572	5.22818	0.366166	0.0624802	3.51441	0.10419	1.28686
501	3.7	3.72	9.517	6.042	3.021	tr|D6RAR4|D6RAR4_HUMAN	Hepatocyte growth factor activator short chain OS=Homo sapiens GN=HGFAC PE=3 SV=1	HUMAN	2	0.330283	0.0906189	7.51756	0.0439349	2.48292	0.530448	0.452094	1018.87	0.000520622	540.459
502	3.67	3.69	17.82	5.116	5.116	sp|O75083|WDR1_HUMAN	WD repeat-containing protein 1 OS=Homo sapiens GN=WDR1 PE=1 SV=4	HUMAN	3	1	1	98.0196	0.010202	98.0196	1.00731	0.972188	8.30514	0.121288	8.36585
503	3.64	3.66	9.389	3.712	3.712	sp|P15169|CBPN_HUMAN	Carboxypeptidase N catalytic chain OS=Homo sapiens GN=CPN1 PE=1 SV=1	HUMAN	2	0.712712	0.319544	10.6091	0.0671791	7.56126	0.871719	0.409896	3.70349	0.235378	3.2284
504	3.6	3.67	21.63	13.94	11.06	tr|F5H7H0|F5H7H0_HUMAN	Glutathione S-transferase omega-1 OS=Homo sapiens GN=GSTO1 PE=3 SV=1	HUMAN	2	0.708075	0.599361	413.366	0.00171295	292.694	0.916297	0.7778	21.1556	0.0433122	19.3849
505	3.55	3.66	8.38	4.469	4.469	sp|P55259|GP2_HUMAN	Pancreatic secretory granule membrane major glycoprotein GP2 OS=Homo sapiens GN=GP2 PE=2 SV=3	HUMAN	2	6.43189					7.13297
506	3.54	3.54	18.46	11.07	5.705	sp|Q9HC38-2|GLOD4_HUMAN	Isoform 2 of Glyoxalase domain-containing protein 4 OS=Homo sapiens GN=GLOD4	HUMAN	2	1.55279	0.0589622	1.59476	0.973682	2.47632	1.34648	0.297111	1.99264	0.675728	2.68306
507	3.52	3.64	22.31	22.31	18.46	tr|J3QL05|J3QL05_HUMAN	Serine/arginine-rich-splicing factor 2 (Fragment) OS=Homo sapiens GN=SRSF2 PE=4 SV=1	HUMAN	2	1.23976					1.71627
508	3.5	4.64	40.24	28.99	24.85	tr|E9PLD0|E9PLD0_HUMAN	Ras-related protein Rab-1B OS=Homo sapiens GN=RAB1B PE=3 SV=1	HUMAN	4	1.15301	0.768866	116.943	0.00985958	134.836	1.57407	0.388943	56.6519	0.027785	89.1741
509	3.49	3.49	11.36	9.416	9.416	tr|H7BY36|H7BY36_HUMAN	RNA-binding protein EWS (Fragment) OS=Homo sapiens GN=EWSR1 PE=4 SV=1	HUMAN	3	1.3684	0.197827	3.59601	0.380533	4.92078	1.14531	0.671365	20.8512	0.0549279	23.8811
510	3.46	4.24	15.66	6.977	4.806	sp|P13667|PDIA4_HUMAN	Protein disulfide-isomerase A4 OS=Homo sapiens GN=PDIA4 PE=1 SV=2	HUMAN	5	0.564315	0.0202272	1.42698	0.395462	0.805265	0.670032	0.134995	2.02738	0.330491	1.35841
511	3.45	3.88	6.789	3.112	2.263	sp|P23246|SFPQ_HUMAN	Splicing factor, proline- and glutamine-rich OS=Homo sapiens GN=SFPQ PE=1 SV=2	HUMAN	3	1.30812	0.313145	6.22497	0.21014	8.14299	1.81061	0.363796	127.782	0.0141696	231.363
512	3.42	3.51	28.13	14.29	8.929	sp|Q00688|FKBP3_HUMAN	Peptidyl-prolyl cis-trans isomerase FKBP3 OS=Homo sapiens GN=FKBP3 PE=1 SV=1	HUMAN	2	1.39502	0.0220271	1.27359	1.09534	1.77669	1.27119	0.235035	1.67418	0.75929	2.1282
513	3.37	3.42	8.624	4.037	4.037	tr|A6NHF2|A6NHF2_HUMAN	Biotinidase OS=Homo sapiens GN=BTD PE=2 SV=3	HUMAN	2	0.729317	0.193694	3.52312	0.207009	2.56947	0.65364	0.526776	356.841	0.00183174	233.245
514	3.35	4.35	11.24	5.473	3.846	sp|P07225|PROS_HUMAN	Vitamin K-dependent protein S OS=Homo sapiens GN=PROS1 PE=1 SV=1	HUMAN	3	0.544614	0.183426	9.8584	0.0552437	5.36903	0.390156	0.157633	20.557	0.0189793	8.02043
515	3.35	3.39	20.69	7.28	7.28	sp|P30040|ERP29_HUMAN	Endoplasmic reticulum resident protein 29 OS=Homo sapiens GN=ERP29 PE=1 SV=4	HUMAN	2	0.75404	0.416706	15.6861	0.0480705	11.828	0.959158	0.824765	6.52732	0.146945	6.26073
516	3.33	3.33	5.516	4.077	4.077	sp|P11279|LAMP1_HUMAN	Lysosome-associated membrane glycoprotein 1 OS=Homo sapiens GN=LAMP1 PE=1 SV=3	HUMAN	2	0.632953	0.136028	3.52875	0.17937	2.23354	0.965454	0.78395	3.54426	0.272399	3.42182
517	3.31	3.39	17.46	6.805	3.846	tr|I3L080|I3L080_HUMAN	Hepatoma-derived growth factor-related protein 2 OS=Homo sapiens GN=HDGFRP2 PE=4 SV=1	HUMAN	2	0.892168	0.679772	13.9416	0.0639934	12.4382	1.41338	0.241417	5.7652	0.245156	8.1484
518	3.3	3.3	6.209	5.68	4.227	sp|Q9HCU0|CD248_HUMAN	Endosialin OS=Homo sapiens GN=CD248 PE=1 SV=1	HUMAN	4	1.3824	0.351041	3.17437	0.435486	4.38824	1.43657	0.186256	2.19742	0.653753	3.15676
519	3.29	3.57	10.77	2.591	1.943	sp|Q9H2G2|SLK_HUMAN	STE20-like serine/threonine-protein kinase OS=Homo sapiens GN=SLK PE=1 SV=1	HUMAN	2	1.09592	0.910719	3804.75	0.00028804	4169.7	1.50124	0.402941	44.1333	0.0340161	66.2546
520	3.28	3.53	26.64	14.95	12.15	sp|CAS1_BOVIN			2	1.76412	0.142935	5.19217	0.339765	9.1596	0.613237	0.201026	7.61333	0.0805477	4.66878
521	3.27	3.29	23.16	23.16	23.16	sp|Q6EEV6|SUMO4_HUMAN	Small ubiquitin-related modifier 4 OS=Homo sapiens GN=SUMO4 PE=1 SV=2	HUMAN	2	0.918944					2.58573
522	3.24	3.35	44.44	28.4	28.4	tr|H0Y614|H0Y614_HUMAN	Ubiquitin-fold modifier 1 (Fragment) OS=Homo sapiens GN=UFM1 PE=4 SV=1	HUMAN	2	1.34433	0.305286	7.06499	0.190281	9.49771	0.63737	0.146384	3.81754	0.166958	2.43318
523	3.23	4.15	8.633	6.715	6.715	sp|P15151|PVR_HUMAN	Poliovirus receptor OS=Homo sapiens GN=PVR PE=1 SV=2	HUMAN	3	0.822081	0.299769	3.55099	0.231508	2.9192	0.475383	0.0843377	3.52225	0.134966	1.67442
524	3.19	3.26	53.15	19.82	19.82	tr|J3KT38|J3KT38_HUMAN	Growth factor receptor-bound protein 2 (Fragment) OS=Homo sapiens GN=GRB2 PE=4 SV=1	HUMAN	2	0.820935	0.306628	3.70787	0.221403	3.04392	1.41466	0.184093	3.71103	0.381204	5.24985
525	3.16	3.43	12.26	6.065	2.695	sp|Q5KU26|COL12_HUMAN	Collectin-12 OS=Homo sapiens GN=COLEC12 PE=1 SV=3	HUMAN	3	1.11037	0.481784	3.51214	0.316153	3.89978	0.635345	0.136635	3.51238	0.180887	2.23157
526	3.16	3.17	32.39	18.31	9.859	sp|Q05315|LPPL_HUMAN	Eosinophil lysophospholipase OS=Homo sapiens GN=CLC PE=1 SV=3	HUMAN	2	5.78986	0.0422088	4.97137	1.16464	28.7835	2.78672	0.0344299	2.31669	1.20289	6.45597
527	3.13	3.32	12.91	4.044	4.044	sp|Q14677-3|EPN4_HUMAN	Isoform 3 of Clathrin interactor 1 OS=Homo sapiens GN=CLINT1	HUMAN	2	1.11241	0.325128	1.42537	0.780438	1.5856	1.22405	0.461308	2.61705	0.467721	3.20341
528	3.11	5.51	11.21	3.115	2.181	sp|P33176|KINH_HUMAN	Kinesin-1 heavy chain OS=Homo sapiens GN=KIF5B PE=1 SV=1	HUMAN	4	2.24674					2.10264
529	3.07	3.09	18.75	10.53	10.53	sp|P46108|CRK_HUMAN	Adapter molecule crk OS=Homo sapiens GN=CRK PE=1 SV=2	HUMAN	2	0.536289	0.420777	471.751	0.00113681	252.995	0.803703	0.779361	2182.1	0.000368316	1753.76
530	3.01	3.06	22.22	13.33	13.33	sp|P09382|LEG1_HUMAN	Galectin-1 OS=Homo sapiens GN=LGALS1 PE=1 SV=2	HUMAN	2	1.57014					1.70465
531	3	6.04	24.65	11.39	6.708	tr|E9PGK1|E9PGK1_HUMAN	Annexin OS=Homo sapiens GN=ANXA6 PE=3 SV=1	HUMAN	6	0.806033	0.398674	2.01171	0.40067	1.62151	1.1202	0.692098	2.2883	0.489534	2.56337
532	3	3	24.71	18.82	18.82	tr|F8VV13|F8VV13_HUMAN	Mucin-like protein 1 OS=Homo sapiens GN=MUCL1 PE=4 SV=1	HUMAN	2	0.493433					0.57758
533	2.97	2.98	9.913	5.831	5.831	sp|Q16651|PRSS8_HUMAN	Prostasin OS=Homo sapiens GN=PRSS8 PE=1 SV=1	HUMAN	2	1.48322	0.156948	3.52716	0.420514	5.23154	1.27572	0.24658	3.53311	0.361077	4.50727
534	2.96	5.58	28.57	28.57	24.11	sp|P01721|LV601_HUMAN	Ig lambda chain V-VI region AR OS=Homo sapiens PE=1 SV=1	HUMAN	6	0.165821					0.27798
535	2.96	3.05	13.67	7.239	4.021	sp|P15104|GLNA_HUMAN	Glutamine synthetase OS=Homo sapiens GN=GLUL PE=1 SV=4	HUMAN	2	1.64018					0.950723
536	2.93	3.14	25	12.14	8.571	sp|O43768-4|ENSA_HUMAN	Isoform 4 of Alpha-endosulfine OS=Homo sapiens GN=ENSA	HUMAN	2	1.28772	0.0952164	1.43642	0.896479	1.8497	1.35928	0.387381	3.33671	0.407373	4.53553
537	2.93	2.96	16.1	8.359	2.167	sp|P52895|AK1C2_HUMAN	Aldo-keto reductase family 1 member C2 OS=Homo sapiens GN=AKR1C2 PE=1 SV=3	HUMAN	1	2.00348	0.0377615	1.8187	1.1016	3.64373	0.621472	0.0311067	1.44726	0.429412	0.899433
538	2.92	2.92	24.62	24.62	24.62	tr|F5H0D7|F5H0D7_HUMAN	Proline-rich protein 4 OS=Homo sapiens GN=PRR4 PE=4 SV=1	HUMAN	3	2.08193					23.2246
539	2.88	3.15	19.5	3.312	1.84	sp|Q9Y2J2|E41L3_HUMAN	Band 4.1-like protein 3 OS=Homo sapiens GN=EPB41L3 PE=1 SV=2	HUMAN	2	0.844837	0.351567	3.74385	0.22566	3.16295	0.743805	0.215805	3.76594	0.197508	2.80113
540	2.81	6.95	30.61	22.12	16.97	sp|Q02985|FHR3_HUMAN	Complement factor H-related protein 3 OS=Homo sapiens GN=CFHR3 PE=1 SV=2	HUMAN	6	0.858068					1.62155
541	2.79	2.82	8.293	5.104	2.552	tr|F5H6P0|F5H6P0_HUMAN	Protein-glutamine gamma-glutamyltransferase 2 OS=Homo sapiens GN=TGM2 PE=3 SV=1	HUMAN	2	1.96155	0.239783	29.546	0.0663896	57.956	1.86886	0.0998803	3.51452	0.531755	6.56815
542	2.77	2.98	40.6	23.31	14.29	sp|P05413|FABPH_HUMAN	Fatty acid-binding protein, heart OS=Homo sapiens GN=FABP3 PE=1 SV=4	HUMAN	3	1.04644					1.02764
543	2.72	6.11	18.49	5.156	1.091	sp|Q5TZA2|CROCC_HUMAN	Rootletin OS=Homo sapiens GN=CROCC PE=1 SV=1	HUMAN	4	0.231366	0.443478	5710844	4.05135e-08	1.3213e+06	0.379712	0.344275	1617.11	0.000234809	614.036
544	2.71	2.76	41.56	36.36	36.36	sp|P50238|CRIP1_HUMAN	Cysteine-rich protein 1 OS=Homo sapiens GN=CRIP1 PE=1 SV=3	HUMAN	3	0.978968					0.911194
545	2.7	3.12	21.18	14.78	8.621	tr|B4DDD6|B4DDD6_HUMAN	Drebrin-like protein OS=Homo sapiens GN=DBNL PE=2 SV=1	HUMAN	3	1.38232	0.283071	2.60627	0.530382	3.6027	1.47205	0.293313	3.24747	0.453293	4.78044
546	2.7	2.78	6.886	4.025	2.648	sp|Q14697|GANAB_HUMAN	Neutral alpha-glucosidase AB OS=Homo sapiens GN=GANAB PE=1 SV=3	HUMAN	2	1.31948	0.276452	5.12272	0.257574	6.75933	3.12203	0.118961	15.4097	0.202601	48.1095
547	2.69	2.79	14.23	4.067	2.957	sp|P48643|TCPE_HUMAN	T-complex protein 1 subunit epsilon OS=Homo sapiens GN=CCT5 PE=1 SV=1	HUMAN	2	1.68372	0.122168	3.61897	0.465247	6.09332	1.49551	0.241144	7.65458	0.195374	11.4475
548	2.68	2.7	16	8.571	8.571	sp|P08567|PLEK_HUMAN	Pleckstrin OS=Homo sapiens GN=PLEK PE=1 SV=3	HUMAN	2	1.24658	0.543295	24.7746	0.0503168	30.8835	1.77522	0.497934	1401.23	0.0012669	2487.49
549	2.67	14.31	57.72	38.21	23.17	sp|P31946|1433B_HUMAN	14-3-3 protein beta/alpha OS=Homo sapiens GN=YWHAB PE=1 SV=3	HUMAN	14	1.32977	0.479263	4.14412	0.320881	5.51073	1.09762	0.451661	1.54068	0.712428	1.69108
550	2.61	2.71	16.15	9.938	5.28	sp|Q9Y5Y7|LYVE1_HUMAN	Lymphatic vessel endothelial hyaluronic acid receptor 1 OS=Homo sapiens GN=LYVE1 PE=1 SV=2	HUMAN	2	0.809253	0.495955	14.2277	0.0568786	11.5138	0.76203	0.247244	4.10761	0.185517	3.13012
551	2.6	2.66	5	2.593	2.593	tr|H0Y2Y8|H0Y2Y8_HUMAN	Zyxin (Fragment) OS=Homo sapiens GN=ZYX PE=4 SV=1	HUMAN	2	1.19514	0.322289	3.51075	0.340423	4.19584	2.01822	0.12364	5.78319	0.34898	11.6718
552	2.59	4.5	32.27	15.45	10	sp|P16035|TIMP2_HUMAN	Metalloproteinase inhibitor 2 OS=Homo sapiens GN=TIMP2 PE=1 SV=2	HUMAN	2	1.33703	0.215307	3.66193	0.365116	4.8961	1.29967	0.601662	100.403	0.0129446	130.491
553	2.55	3.33	14.24	2.62	0.9112	sp|O60437|PEPL_HUMAN	Periplakin OS=Homo sapiens GN=PPL PE=1 SV=4	HUMAN	2	0.814968	0.343505	4.74388	0.171794	3.86611	0.701168	0.182738	3.78691	0.185156	2.65526
554	2.51	2.51	14.56	14.56	10.76	sp|P10124|SRGN_HUMAN	Serglycin OS=Homo sapiens GN=SRGN PE=1 SV=3	HUMAN	1
555	2.49	2.61	21.64	14.18	8.955	sp|A6NHG4|DDTL_HUMAN	D-dopachrome decarboxylase-like protein OS=Homo sapiens GN=DDTL PE=2 SV=1	HUMAN	1	1.88558	0.1563	7.53267	0.250321	14.2035	0.879672	0.672963	17.9405	0.0490326	15.7818
556	2.49	2.54	6.032	2.681	1.877	tr|H3BQZ7|H3BQZ7_HUMAN	HCG2044799 OS=Homo sapiens GN=hCG_2044799 PE=4 SV=1	HUMAN	1	0.910696	0.822403	63.4072	0.0143627	57.7447	1.02839	0.947633	74.7953	0.0137494	76.9189
557	2.48	2.48	26.5	22.22	6.838	sp|P19957|ELAF_HUMAN	Elafin OS=Homo sapiens GN=PI3 PE=1 SV=3	HUMAN	1	1.17658	0.224378	1.40358	0.838272	1.65143	1.60709	0.0196576	1.39144	1.15498	2.23617
558	2.46	2.61	4.903	1.311	0.6271	sp|P39060|COIA1_HUMAN	Collagen alpha-1(XVIII) chain OS=Homo sapiens GN=COL18A1 PE=1 SV=5	HUMAN	1	0.722856	0.19247	3.61881	0.19975	2.61588	0.511002	0.0959646	3.65368	0.139859	1.86704
559	2.45	2.57	17.68	9.669	2.486	sp|P30490|1B52_HUMAN	HLA class I histocompatibility antigen, B-52 alpha chain OS=Homo sapiens GN=HLA-B PE=2 SV=1	HUMAN	1	1.02438	0.864754	4.13232	0.247894	4.23306	1.81367	0.117417	4.10103	0.442248	7.43792
560	2.45	2.45	37.9	33.87	27.42	sp|Q14508|WFDC2_HUMAN	WAP four-disulfide core domain protein 2 OS=Homo sapiens GN=WFDC2 PE=1 SV=2	HUMAN	6	2.91961	0.0391955	2.56165	1.13974	7.47901	1.97046	0.334803	10.1402	0.194322	19.9808
561	2.4	2.45	40.15	13.64	9.091	sp|P15090|FABP4_HUMAN	Fatty acid-binding protein, adipocyte OS=Homo sapiens GN=FABP4 PE=1 SV=3	HUMAN	2	0.818577					0.493528
562	2.38	2.48	8.108	3.534	2.287	sp|P18428|LBP_HUMAN	Lipopolysaccharide-binding protein OS=Homo sapiens GN=LBP PE=1 SV=3	HUMAN	1	0.633836	0.315958	23.0408	0.0275093	14.6041	0.407044	0.181772	28.5738	0.0142454	11.6308
563	2.37	3.37	19.42	15.05	6.796	sp|P11233|RALA_HUMAN	Ras-related protein Ral-A OS=Homo sapiens GN=RALA PE=1 SV=1	HUMAN	2	1.40575					2.59033
564	2.37	3.33	12.68	7.213	1.53	sp|Q15424|SAFB1_HUMAN	Scaffold attachment factor B1 OS=Homo sapiens GN=SAFB PE=1 SV=4	HUMAN	2	0.561861	0.180453	2.87194	0.195638	1.61363	0.670542	0.42539	3.98377	0.168318	2.67128
565	2.37	2.37	28.21	28.21	28.21	tr|B0YIW2|B0YIW2_HUMAN	Apolipoprotein C-III OS=Homo sapiens GN=APOC3 PE=4 SV=1	HUMAN	5	0.483979					0.846199
566	2.35	2.66	17.31	5.23	0.9963	sp|P14625|ENPL_HUMAN	Endoplasmin OS=Homo sapiens GN=HSP90B1 PE=1 SV=1	HUMAN	1	1.37211	0.0858574	1.53244	0.895376	2.10268	2.40333	0.212133	8.04833	0.298612	19.3428
567	2.29	3.03	10.79	0.8328	0.2562	sp|P24043|LAMA2_HUMAN	Laminin subunit alpha-2 OS=Homo sapiens GN=LAMA2 PE=1 SV=4	HUMAN	1	0.286099	0.507747	11902600	2.40367e-08	3.40532e+06	0.242318	0.30112	10065.8	2.40736e-05	2439.12
568	2.28	3	20.61	16.67	10.96	sp|Q9HB71|CYBP_HUMAN	Calcyclin-binding protein OS=Homo sapiens GN=CACYBP PE=1 SV=2	HUMAN	3	2.05641					2.47467
569	2.28	2.5	16.63	2.871	1.914	sp|Q15063|POSTN_HUMAN	Periostin OS=Homo sapiens GN=POSTN PE=1 SV=2	HUMAN	1	1.66582					1.82175
570	2.28	2.28	13.56	10.17	6.215	tr|J3QRS3|J3QRS3_HUMAN	Myosin regulatory light chain 12A OS=Homo sapiens GN=MYL12A PE=4 SV=1	HUMAN	1	1.63768	0.342515	42.104	0.038896	68.9526	2.93584	0.359009	5735.67	0.000511857	16839
571	2.27	2.72	11.31	3.241	1.323	sp|P07814|SYEP_HUMAN	Bifunctional glutamate/proline--tRNA ligase OS=Homo sapiens GN=EPRS PE=1 SV=5	HUMAN	2	0.214857					1.33312
572	2.27	2.31	5.139	2.158	1.542	sp|P19021|AMD_HUMAN	Peptidyl-glycine alpha-amidating monooxygenase OS=Homo sapiens GN=PAM PE=1 SV=2	HUMAN	1	1.89281	0.239528	24.6045	0.0769296	46.5716	2.25603	0.423212	3303.11	0.000683003	7451.93
573	2.26	2.78	21.76	16.74	6.695	tr|H3BPK3|H3BPK3_HUMAN	Hydroxyacylglutathione hydrolase, mitochondrial (Fragment) OS=Homo sapiens GN=HAGH PE=3 SV=1	HUMAN	1	0.910857	0.87035	312.483	0.00291491	284.627	1.5134	0.31813	17.7124	0.085443	26.8059
574	2.25	2.26	18.31	18.31	18.31	sp|O60234|GMFG_HUMAN	Glia maturation factor gamma OS=Homo sapiens GN=GMFG PE=1 SV=1	HUMAN	2	0.648297					1.8954
575	2.23	3.48	10.07	2.506	1.04	sp|Q14980|NUMA1_HUMAN	Nuclear mitotic apparatus protein 1 OS=Homo sapiens GN=NUMA1 PE=1 SV=2	HUMAN	2	1.71286					2.38232
576	2.23	2.56	8.912	1.204	0.4817	sp|P11717|MPRI_HUMAN	Cation-independent mannose-6-phosphate receptor OS=Homo sapiens GN=IGF2R PE=1 SV=3	HUMAN	1	0.9178					0.809802
577	2.23	2.28	10.15	3.448	1.341	sp|P00390|GSHR_HUMAN	Glutathione reductase, mitochondrial OS=Homo sapiens GN=GSR PE=1 SV=2	HUMAN	1	1.00634					2.34237
578	2.22	2.44	15.41	4.239	2.312	sp|P28838|AMPL_HUMAN	Cytosol aminopeptidase OS=Homo sapiens GN=LAP3 PE=1 SV=3	HUMAN	1	1.37469	0.429336	25.3424	0.0542448	34.838	2.13784	0.189122	19.209	0.111294	41.0658
579	2.21	2.39	18.25	8.226	3.599	tr|A8MYB8|A8MYB8_HUMAN	Aldehyde dehydrogenase, dimeric NADP-preferring OS=Homo sapiens GN=ALDH3A1 PE=3 SV=1	HUMAN	1	1.17592	0.778553	292.518	0.00401999	343.976	1.00478	0.96938	3.52209	0.28528	3.53893
580	2.2	3.02	7.958	0.156	0.156	RRRRRsp|Q9NYC9|DYH9_HUMAN	REVERSED Dynein heavy chain 9, axonemal OS=Homo sapiens GN=DNAH9 PE=1 SV=3	HUMAN	1	1.10481					0.664726
581	2.19	2.33	6.684	2.883	1.048	sp|Q06481|APLP2_HUMAN	Amyloid-like protein 2 OS=Homo sapiens GN=APLP2 PE=1 SV=2	HUMAN	1	0.960948	0.803808	4.90398	0.195953	4.71247	0.541097	0.247203	24.3421	0.0222289	13.1714
582	2.18	2.38	11.28	3.47	1.363	sp|Q9HCB6|SPON1_HUMAN	Spondin-1 OS=Homo sapiens GN=SPON1 PE=1 SV=2	HUMAN	1	1.40404	0.245152	2.45271	0.572444	3.44371	0.688062	0.0532094	1.47213	0.467392	1.01292
583	2.17	2.85	10.56	7.778	4.444	tr|Q86UY0|Q86UY0_HUMAN	TXNDC5 protein OS=Homo sapiens GN=TXNDC5 PE=2 SV=1	HUMAN	2	1.21128					0.710286
584	2.17	2.22	9.04	4.802	3.107	sp|A8MTJ3|GNAT3_HUMAN	Guanine nucleotide-binding protein G(t) subunit alpha-3 OS=Homo sapiens GN=GNAT3 PE=2 SV=2	HUMAN	1	1.02278					1.32087
585	2.15	2.32	11.48	4.645	2.186	sp|P13010|XRCC5_HUMAN	X-ray repair cross-complementing protein 5 OS=Homo sapiens GN=XRCC5 PE=1 SV=3	HUMAN	2	1.47104	0.499403	7.6205	0.193037	11.21	1.33366	0.547728	5.62721	0.237002	7.50479
586	2.15	2.19	6.408	3.373	1.686	sp|P28799|GRN_HUMAN	Granulins OS=Homo sapiens GN=GRN PE=1 SV=2	HUMAN	1	0.765904	0.231432	3.62984	0.211002	2.78011	1.06793	0.635683	3.65565	0.29213	3.90397
587	2.13	4.14	17.9	10.23	7.67	sp|Q9NYL9|TMOD3_HUMAN	Tropomodulin-3 OS=Homo sapiens GN=TMOD3 PE=1 SV=1	HUMAN	2	1.16377	0.833519	1339.85	0.000868581	1559.28	0.979976	0.974858	668.067	0.00146688	654.69
588	2.13	2.41	7.963	1.76	0.922	sp|Q13753|LAMC2_HUMAN	Laminin subunit gamma-2 OS=Homo sapiens GN=LAMC2 PE=1 SV=2	HUMAN	1	1.08697					0.512323
589	2.13	2.4	5.265	2.083	1.493	sp|P58107|EPIPL_HUMAN	Epiplakin OS=Homo sapiens GN=EPPK1 PE=1 SV=2	HUMAN	1	0.780473	0.666801	234.469	0.00332869	182.997	0.763264	0.746255	3466.65	0.000220173	2645.97
590	2.13	2.26	5.813	1.799	0.692	sp|P23470|PTPRG_HUMAN	Receptor-type tyrosine-protein phosphatase gamma OS=Homo sapiens GN=PTPRG PE=1 SV=4	HUMAN	1	0.660461	0.321714	18.4688	0.035761	12.1979	0.540575	0.345293	111.092	0.00486602	60.0535
591	2.13	2.15	10.31	6.873	3.436	sp|P17936|IBP3_HUMAN	Insulin-like growth factor-binding protein 3 OS=Homo sapiens GN=IGFBP3 PE=1 SV=2	HUMAN	1	0.261108	0.0477033	3.59981	0.0725339	0.939941	0.185004	0.0763438	13.243	0.0139699	2.45001
592	2.11	2.15	35.56	23.33	23.33	tr|A6NL93|A6NL93_HUMAN	Non-histone chromosomal protein HMG-14 OS=Homo sapiens GN=HMGN1 PE=4 SV=1	HUMAN	3	1.1373	0.450353	4.04616	0.281082	4.60171	1.88147	0.109529	4.03696	0.466061	7.59542
593	2.11	2.13	9.985	4.236	3.328	sp|Q9NQ79|CRAC1_HUMAN	Cartilage acidic protein 1 OS=Homo sapiens GN=CRTAC1 PE=1 SV=2	HUMAN	1	0.571627	0.316715	47.4168	0.0120554	27.1048	0.250131	0.334803	27447.2	9.11314e-06	6865.4
594	2.1	50.81	80.73	71.87	58.72	sp|P01861|IGHG4_HUMAN	Ig gamma-4 chain C region OS=Homo sapiens GN=IGHG4 PE=1 SV=1	HUMAN	103	0.0524687					0.104069
595	2.1	2.41	8.121	0.6961	0.406	sp|Q9UKK3|PARP4_HUMAN	Poly [ADP-ribose] polymerase 4 OS=Homo sapiens GN=PARP4 PE=1 SV=3	HUMAN	1
596	2.1	2.2	22.22	6.25	6.25	sp|Q02878|RL6_HUMAN	60S ribosomal protein L6 OS=Homo sapiens GN=RPL6 PE=1 SV=3	HUMAN	1	0.769154					0.875215
597	2.09	2.87	10.07	5.152	5.152	sp|P29622|KAIN_HUMAN	Kallistatin OS=Homo sapiens GN=SERPINA4 PE=1 SV=3	HUMAN	2	0.408641	0.0137258	1.57753	0.259039	0.644642	0.629837	0.27589	3.81806	0.164963	2.40475
598	2.09	2.48	4.651	2.481	1.55	tr|F8VPG7|F8VPG7_HUMAN	Phosphatidylinositol-binding clathrin assembly protein OS=Homo sapiens GN=PICALM PE=4 SV=1	HUMAN	1	1.19603					1.55337
599	2.09	2.27	9.914	3.664	1.724	sp|Q9BZQ8|NIBAN_HUMAN	Protein Niban OS=Homo sapiens GN=FAM129A PE=1 SV=1	HUMAN	1	0.70182					1.35546
600	2.09	2.18	10.27	1.507	1.507	sp|P52272|HNRPM_HUMAN	Heterogeneous nuclear ribonucleoprotein M OS=Homo sapiens GN=HNRNPM PE=1 SV=3	HUMAN	2	1.74843					2.9012
601	2.08	2.15	7.838	4.054	2.703	tr|G3V2F7|G3V2F7_HUMAN	HCG2044781 OS=Homo sapiens GN=TMEM189 PE=4 SV=1	HUMAN	1	1.24057					1.12589
602	2.08	2.11	9.74	2.814	1.732	tr|F8W9Q2|F8W9Q2_HUMAN	RNA polymerase II-associated factor 1 homolog OS=Homo sapiens GN=PAF1 PE=4 SV=1	HUMAN	1	1.70612					1.36376
603	2.08	2.1	11.99	2.934	1.403	sp|P33151|CADH5_HUMAN	Cadherin-5 OS=Homo sapiens GN=CDH5 PE=1 SV=5	HUMAN	1	0.546377					0.479611
604	2.08	2.08	19.72	8.451	4.93	tr|C9JRR0|C9JRR0_HUMAN	Augurin (Fragment) OS=Homo sapiens GN=C2orf40 PE=4 SV=1	HUMAN	1	1.74784	0.461848	539.996	0.00323676	943.824	3.43878	0.432396	318072	1.08113e-05	1.09378e+06
605	2.07	10.91	19.92	15.68	10.59	sp|P02533|K1C14_HUMAN	Keratin, type I cytoskeletal 14 OS=Homo sapiens GN=KRT14 PE=1 SV=4	HUMAN	6	0.684739					0.63304
606	2.07	2.37	6.359	1.519	0.9567	tr|D3YTG3|D3YTG3_HUMAN	Target of Nesh-SH3 OS=Homo sapiens GN=ABI3BP PE=4 SV=1	HUMAN	1	0.435785					0.638554
607	2.07	2.18	3.279	1.865	1.187	tr|G3V511|G3V511_HUMAN	Latent-transforming growth factor beta-binding protein 2 OS=Homo sapiens GN=LTBP2 PE=4 SV=1	HUMAN	2	1.4121					1.03456
608	2.07	2.12	12.01	6.769	3.93	sp|Q8N4F0|BPIB2_HUMAN	BPI fold-containing family B member 2 OS=Homo sapiens GN=BPIFB2 PE=1 SV=2	HUMAN	1	3.12716	0.327447	3590.62	0.000870924	11228.4	6.15437	0.286648	70315.7	8.75248e-05	432748
609	2.07	2.1	27.32	16.94	7.65	sp|Q13185|CBX3_HUMAN	Chromobox protein homolog 3 OS=Homo sapiens GN=CBX3 PE=1 SV=4	HUMAN	1	0.97948					2.21585
610	2.06	2.7	14.45	12.14	12.14	sp|Q969H8|CS010_HUMAN	UPF0556 protein C19orf10 OS=Homo sapiens GN=C19orf10 PE=1 SV=1	HUMAN	2	0.552605					1.66812
611	2.06	2.31	9.025	3.785	3.057	sp|Q9NPH3-5|IL1AP_HUMAN	Isoform 4 of Interleukin-1 receptor accessory protein OS=Homo sapiens GN=IL1RAP	HUMAN	3	0.541051	0.103906	3.61561	0.149643	1.95623	0.372416	0.118876	10.7095	0.0347743	3.98839
612	2.06	2.28	8.563	2.264	1.476	sp|Q9Y6C2|EMIL1_HUMAN	EMILIN-1 OS=Homo sapiens GN=EMILIN1 PE=1 SV=2	HUMAN	1	1.3256					0.787129
613	2.06	2.24	10.65	1.111	1.111	sp|Q5RHP9|CA173_HUMAN	Uncharacterized protein C1orf173 OS=Homo sapiens GN=C1orf173 PE=2 SV=1	HUMAN	1	0.88679					2.24291
614	2.06	2.16	7.746	3.521	2.641	sp|Q9UHD8-2|SEPT9_HUMAN	Isoform 2 of Septin-9 OS=Homo sapiens GN=SEPT9	HUMAN	1	0.299704					0.696134
615	2.06	2.12	18.78	6.939	4.082	sp|P02745|C1QA_HUMAN	Complement C1q subcomponent subunit A OS=Homo sapiens GN=C1QA PE=1 SV=2	HUMAN	1	0.662977	0.416912	55.1716	0.0120166	36.5775	0.470922	0.087185	3.73835	0.125971	1.76047
616	2.06	2.1	9.476	4.435	1.815	tr|H7C3P4|H7C3P4_HUMAN	Glucosamine (N-acetyl)-6-sulfatase (Sanfilippo disease IIID), isoform CRA_b OS=Homo sapiens GN=GNS PE=4 SV=1	HUMAN	1	1.1905					1.20773
617	2.06	2.06	24.64	24.64	17.39	sp|P62857|RS28_HUMAN	40S ribosomal protein S28 OS=Homo sapiens GN=RPS28 PE=1 SV=1	HUMAN	1	1.1244					1.44133
618	2.05	10.23	40.78	28.34	11.98	sp|P09104|ENOG_HUMAN	Gamma-enolase OS=Homo sapiens GN=ENO2 PE=1 SV=3	HUMAN	9	1.19287					1.38119
619	2.05	2.29	10.83	1.62	0.682	RRRRRsp|Q2M389|WASH7_HUMAN	REVERSED WASH complex subunit 7 OS=Homo sapiens GN=KIAA1033 PE=1 SV=2	HUMAN	1	0.142737					0.271416
620	2.05	2.19	8.656	2.05	1.367	tr|E9PPJ0|E9PPJ0_HUMAN	Splicing factor 3B subunit 2 OS=Homo sapiens GN=SF3B2 PE=4 SV=1	HUMAN	1	0.747035					0.793742
621	2.05	2.12	5.433	3.396	2.207	sp|Q9UMX0|UBQL1_HUMAN	Ubiquilin-1 OS=Homo sapiens GN=UBQLN1 PE=1 SV=2	HUMAN	1	1.01181					1.08809
622	2.05	2.09	15.92	8.955	8.955	sp|Q01995|TAGL_HUMAN	Transgelin OS=Homo sapiens GN=TAGLN PE=1 SV=4	HUMAN	2	1.09621					0.889618
623	2.04	2.9	15.48	2.976	2.976	sp|Q13217|DNJC3_HUMAN	DnaJ homolog subfamily C member 3 OS=Homo sapiens GN=DNAJC3 PE=1 SV=1	HUMAN	2	0.784594	0.521351	27.0135	0.0290445	21.1947	0.992965	0.985552	52.0335	0.0190832	51.6674
624	2.04	2.2	9.395	0.8758	0.8758	tr|E9PC28|E9PC28_HUMAN	Receptor-type tyrosine-protein phosphatase C OS=Homo sapiens GN=PTPRC PE=4 SV=1	HUMAN	1	0.810757	0.283048	3.56063	0.2277	2.88681	1.26179	0.401396	8.64111	0.146022	10.9033
625	2.04	2.15	14.02	5.607	2.57	tr|J3QLD9|J3QLD9_HUMAN	Flotillin-2 OS=Homo sapiens GN=FLOT2 PE=4 SV=1	HUMAN	1	1.34652					5.94576
626	2.04	2.12	11.17	2.707	2.707	tr|E7EQV3|E7EQV3_HUMAN	Polyadenylate-binding protein 1 OS=Homo sapiens GN=PABPC1 PE=4 SV=1	HUMAN	1	1.03825					0.702709
627	2.04	2.09	9.074	2.722	1.633	sp|O15389|SIGL5_HUMAN	Sialic acid-binding Ig-like lectin 5 OS=Homo sapiens GN=SIGLEC5 PE=1 SV=1	HUMAN	1	1.93479					1.46384
628	2.04	2.08	13.37	2.941	2.941	sp|Q6P6B1|CH047_HUMAN	Uncharacterized protein C8orf47 OS=Homo sapiens GN=C8orf47 PE=2 SV=1	HUMAN	1	1.57657					3.86841
629	2.04	2.07	6.389	3.715	3.715	sp|Q6EMK4|VASN_HUMAN	Vasorin OS=Homo sapiens GN=VASN PE=1 SV=1	HUMAN	2	0.444644					0.558065
630	2.04	2.07	6.25	2.083	2.083	tr|I3L1N7|I3L1N7_HUMAN	Sex hormone-binding globulin OS=Homo sapiens GN=SHBG PE=4 SV=1	HUMAN	1	1.13712	0.464766	4.31159	0.263736	4.90281	0.898676	0.624654	7.60752	0.11813	6.83669
631	2.04	2.05	18.64	15.82	8.475	sp|P18510|IL1RA_HUMAN	Interleukin-1 receptor antagonist protein OS=Homo sapiens GN=IL1RN PE=1 SV=1	HUMAN	1	0.359745					0.408668
632	2.04	2.04	21.62	4.054	4.054	tr|J3KN29|J3KN29_HUMAN	26S proteasome non-ATPase regulatory subunit 9 OS=Homo sapiens GN=PSMD9 PE=4 SV=1	HUMAN	1	0.977762	0.947366	31.4475	0.0310919	30.7481	0.964119	0.777759	3.5805	0.269269	3.45203
633	2.04	2.04	21.28	21.28	21.28	sp|P59666|DEF3_HUMAN	Neutrophil defensin 3 OS=Homo sapiens GN=DEFA3 PE=1 SV=1	HUMAN	2	0.866262					1.65226
634	2.03	3.76	57.39	53.04	36.52	sp|P04433|KV309_HUMAN	Ig kappa chain V-III region VG (Fragment) OS=Homo sapiens PE=1 SV=1	HUMAN	11	0.101812					0.181035
635	2.03	3.02	9.774	6.015	4.511	tr|E9PF41|E9PF41_HUMAN	Actin-related protein 2 OS=Homo sapiens GN=ACTR2 PE=3 SV=1	HUMAN	2	0.488219					0.742065
636	2.03	2.31	13.6	7.456	4.386	tr|G8JLH6|G8JLH6_HUMAN	CD9 antigen (Fragment) OS=Homo sapiens GN=CD9 PE=4 SV=1	HUMAN	1	0.443581					0.573335
637	2.03	2.27	14.33	4.775	3.09	sp|Q15365|PCBP1_HUMAN	Poly(rC)-binding protein 1 OS=Homo sapiens GN=PCBP1 PE=1 SV=2	HUMAN	1	1.78215					0.841197
638	2.03	2.24	8.815	1.114	1.114	tr|Q5VY93|Q5VY93_HUMAN	Rho guanine nucleotide exchange factor 2 OS=Homo sapiens GN=ARHGEF2 PE=2 SV=1	HUMAN	1	0.937996					1.92305
639	2.03	2.24	10.45	1.306	1.306	tr|Q5T5C7|Q5T5C7_HUMAN	Serine--tRNA ligase, cytoplasmic OS=Homo sapiens GN=SARS PE=2 SV=1	HUMAN	1	0.665145					0.479936
640	2.03	2.16	5.698	1.788	1.788	sp|Q14118|DAG1_HUMAN	Dystroglycan OS=Homo sapiens GN=DAG1 PE=1 SV=2	HUMAN	1	0.499984					0.227911
641	2.03	2.15	5.036	1.079	0.4496	sp|P12259|FA5_HUMAN	Coagulation factor V OS=Homo sapiens GN=F5 PE=1 SV=4	HUMAN	1	0.471703					0.480603
642	2.03	2.13	12.84	4.421	4.421	sp|Q96KP4|CNDP2_HUMAN	Cytosolic non-specific dipeptidase OS=Homo sapiens GN=CNDP2 PE=1 SV=2	HUMAN	1	0.374611	0.116688	10.1012	0.0370859	3.78402	0.70079	0.176766	3.62417	0.193366	2.53979
643	2.03	2.13	4.576	2.002	0.9533	sp|Q02413|DSG1_HUMAN	Desmoglein-1 OS=Homo sapiens GN=DSG1 PE=1 SV=2	HUMAN	1
644	2.03	2.12	11.51	1.79	1.79	RRRRRsp|Q8N6V9|TEX9_HUMAN	REVERSED Testis-expressed sequence 9 protein OS=Homo sapiens GN=TEX9 PE=2 SV=1	HUMAN	1	2.31329					2.04516
645	2.03	2.12	20.77	8.197	5.464	tr|C9J0A7|C9J0A7_HUMAN	Charged multivesicular body protein 2b OS=Homo sapiens GN=CHMP2B PE=4 SV=1	HUMAN	1	1.73027					3.4666
646	2.03	2.1	12.17	2.676	2.676	sp|Q13510-2|ASAH1_HUMAN	Isoform 2 of Acid ceramidase OS=Homo sapiens GN=ASAH1	HUMAN	1	0.594201					0.518735
647	2.03	2.09	9.615	4.06	2.778	sp|P43353|AL3B1_HUMAN	Aldehyde dehydrogenase family 3 member B1 OS=Homo sapiens GN=ALDH3B1 PE=1 SV=1	HUMAN	1	1.33754					1.10565
648	2.03	2.07	12.65	5.422	3.614	sp|Q53FA7|QORX_HUMAN	Quinone oxidoreductase PIG3 OS=Homo sapiens GN=TP53I3 PE=1 SV=2	HUMAN	1	1.30611	0.360332	8.63532	0.151252	11.2787	1.31809	0.246198	4.17474	0.31573	5.50267
649	2.03	2.06	3.046	1.05	1.05	sp|P10253|LYAG_HUMAN	Lysosomal alpha-glucosidase OS=Homo sapiens GN=GAA PE=1 SV=4	HUMAN	1	0.772342					1.1343
650	2.02	22.43	36.67	33.03	28.79	sp|Q03591|FHR1_HUMAN	Complement factor H-related protein 1 OS=Homo sapiens GN=CFHR1 PE=1 SV=2	HUMAN	15
651	2.02	4.66	58.33	54.17	38.33	sp|P01766|HV305_HUMAN	Ig heavy chain V-III region BRO OS=Homo sapiens PE=1 SV=1	HUMAN	21
652	2.02	2.33	8.937	2.161	0.7009	sp|P08572|CO4A2_HUMAN	Collagen alpha-2(IV) chain OS=Homo sapiens GN=COL4A2 PE=1 SV=4	HUMAN	1	0.939227					1.12992
653	2.02	2.17	14.52	9.677	4.839	sp|O15143|ARC1B_HUMAN	Actin-related protein 2/3 complex subunit 1B OS=Homo sapiens GN=ARPC1B PE=1 SV=3	HUMAN	1	1.36204					2.49919
654	2.02	2.16	13.03	2.385	1.468	sp|P49368|TCPG_HUMAN	T-complex protein 1 subunit gamma OS=Homo sapiens GN=CCT3 PE=1 SV=4	HUMAN	1	1.43297					0.944597
655	2.02	2.15	12.5	4.167	3.03	sp|P54577|SYYC_HUMAN	Tyrosine--tRNA ligase, cytoplasmic OS=Homo sapiens GN=YARS PE=1 SV=4	HUMAN	2	1.8992					2.45381
656	2.02	2.11	37.04	24.07	23.15	sp|P01714|LV301_HUMAN	Ig lambda chain V-III region SH OS=Homo sapiens PE=1 SV=1	HUMAN	2	0.154589					0.293311
657	2.02	2.09	8.493	1.911	1.911	tr|G3XAD9|G3XAD9_HUMAN	Alpha-N-acetylgalactosaminide alpha-2,6-sialyltransferase 1 OS=Homo sapiens GN=ST6GALNAC1 PE=4 SV=1	HUMAN	1	2.00236					1.59093
658	2.02	2.09	18.37	12.65	8.571	sp|CTRA_BOVIN			1	0.459293					0.977486
659	2.02	2.07	8.564	3.315	3.315	sp|Q9BRK5|CAB45_HUMAN	45 kDa calcium-binding protein OS=Homo sapiens GN=SDF4 PE=1 SV=1	HUMAN	1	1.22361					4.13076
660	2.02	2.05	8.13	2.71	2.71	sp|Q8NFI4|F10A5_HUMAN	Putative protein FAM10A5 OS=Homo sapiens GN=ST13P5 PE=5 SV=1	HUMAN	1	0.598215					0.580074
661	2.02	2.04	18.18	7.071	7.071	sp|P31431|SDC4_HUMAN	Syndecan-4 OS=Homo sapiens GN=SDC4 PE=1 SV=2	HUMAN	1	0.463405	0.0818116	3.53554	0.131071	1.63838	0.295932	0.427404	217837	1.3585e-06	64464.9
662	2.02	2.03	4.067	0.6973	0.6973	sp|Q14766|LTBP1_HUMAN	Latent-transforming growth factor beta-binding protein 1 OS=Homo sapiens GN=LTBP1 PE=1 SV=4	HUMAN	1	1.2047	0.831681	6248.67	0.000192793	7527.77	4.70487	0.539844	4875943936	9.64915e-10	2.29407e+10
663	2.02	2.03	9.783	7.609	5.435	sp|O43240|KLK10_HUMAN	Kallikrein-10 OS=Homo sapiens GN=KLK10 PE=1 SV=3	HUMAN	1	0.560691					0.663273
664	2.02	2.02	4.921	1.429	1.429	tr|E9PHD4|E9PHD4_HUMAN	Lipolysis-stimulated lipoprotein receptor OS=Homo sapiens GN=LSR PE=4 SV=1	HUMAN	1	0.807026	0.274994	3.51072	0.229875	2.83324	1.98558	0.0911228	3.51148	0.565453	6.97232
665	2.01	30.87	65.88	53.53	46.47	sp|P01877|IGHA2_HUMAN	Ig alpha-2 chain C region OS=Homo sapiens GN=IGHA2 PE=1 SV=3	HUMAN	37	0.339884					0.74245
666	2.01	7.66	14.33	12.12	10.74	sp|P54725|RD23A_HUMAN	UV excision repair protein RAD23 homolog A OS=Homo sapiens GN=RAD23A PE=1 SV=1	HUMAN	5	0.739331					0.699115
667	2.01	3.72	8.719	3.025	3.025	tr|F8WF14|F8WF14_HUMAN	Cholinesterase OS=Homo sapiens GN=BCHE PE=4 SV=1	HUMAN	2	0.264406					0.526328
668	2.01	2.31	5.604	1.632	0.6529	sp|O15031|PLXB2_HUMAN	Plexin-B2 OS=Homo sapiens GN=PLXNB2 PE=1 SV=3	HUMAN	1	1.4066					0.940434
669	2.01	2.25	9.415	2.12	1.696	sp|Q92896|GSLG1_HUMAN	Golgi apparatus protein 1 OS=Homo sapiens GN=GLG1 PE=1 SV=2	HUMAN	2	1.34582					2.73388
670	2.01	2.15	6.524	2.055	0.983	sp|Q9HBR0|S38AA_HUMAN	Putative sodium-coupled neutral amino acid transporter 10 OS=Homo sapiens GN=SLC38A10 PE=1 SV=2	HUMAN	1	0.823945					1.76109
671	2.01	2.13	5.16	0.5733	0.5733	sp|Q86SQ4|GP126_HUMAN	G-protein coupled receptor 126 OS=Homo sapiens GN=GPR126 PE=1 SV=3	HUMAN	1	0.789822					0.80447
672	2.01	2.13	9.984	1.585	1.585	sp|Q9H4E7|DEFI6_HUMAN	Differentially expressed in FDCP 6 homolog OS=Homo sapiens GN=DEF6 PE=1 SV=1	HUMAN	1	1.15318					1.2529
673	2.01	2.11	5.997	2.699	1.949	sp|Q86UX7|URP2_HUMAN	Fermitin family homolog 3 OS=Homo sapiens GN=FERMT3 PE=1 SV=1	HUMAN	1	0.645499					2.76341
674	2.01	2.09	9.635	2.604	2.604	tr|G3V1Q4|G3V1Q4_HUMAN	Septin 7, isoform CRA_a OS=Homo sapiens GN=SEPT7 PE=3 SV=1	HUMAN	1	1.09204					1.38156
675	2.01	2.08	9.808	2.345	2.345	tr|B4DDJ5|B4DDJ5_HUMAN	Macrophage scavenger receptor types I and II OS=Homo sapiens GN=MSR1 PE=2 SV=1	HUMAN	1	0.653919	0.677731	16899.2	3.86952e-05	11050.7	0.676019	0.604821	1050.96	0.00064324	710.469
676	2.01	2.08	11.41	3.604	3.604	sp|O14908|GIPC1_HUMAN	PDZ domain-containing protein GIPC1 OS=Homo sapiens GN=GIPC1 PE=1 SV=2	HUMAN	1	2.84632					1.674
677	2.01	2.07	11.13	5.892	2.946	sp|Q96HN2|SAHH3_HUMAN	Putative adenosylhomocysteinase 3 OS=Homo sapiens GN=AHCYL2 PE=1 SV=1	HUMAN	1	0.898482					1.00115
678	2.01	2.07	11.39	2.5	2.5	tr|G3V181|G3V181_HUMAN	Synaptotagmin-like 1, isoform CRA_d OS=Homo sapiens GN=SYTL1 PE=4 SV=1	HUMAN	1	2.27307					8.13329
679	2.01	2.07	14.61	5.479	3.196	sp|Q9NZZ3|CHMP5_HUMAN	Charged multivesicular body protein 5 OS=Homo sapiens GN=CHMP5 PE=1 SV=1	HUMAN	1	1.82219					1.41575
680	2.01	2.06	6.667	3.81	3.81	sp|O96009|NAPSA_HUMAN	Napsin-A OS=Homo sapiens GN=NAPSA PE=1 SV=1	HUMAN	2	0.588255					0.488298
681	2.01	2.05	14.88	6.548	4.762	tr|B4DT77|B4DT77_HUMAN	Annexin OS=Homo sapiens GN=ANXA7 PE=2 SV=1	HUMAN	1	0.69468					0.739987
682	2.01	2.05	12.73	7.727	7.727	tr|B5MCC9|B5MCC9_HUMAN	Cell growth regulator with EF hand domain protein 1 OS=Homo sapiens GN=CGREF1 PE=4 SV=1	HUMAN	1	1.01366					1.04672
683	2.01	2.04	3.971	1.324	1.324	sp|Q99523|SORT_HUMAN	Sortilin OS=Homo sapiens GN=SORT1 PE=1 SV=3	HUMAN	1	2.04572					0.612066
684	2.01	2.03	4.994	1.93	1.249	sp|Q9UPN7|PP6R1_HUMAN	Serine/threonine-protein phosphatase 6 regulatory subunit 1 OS=Homo sapiens GN=PPP6R1 PE=1 SV=5	HUMAN	1	1.17953					1.47609
685	2.01	2.03	7.895	1.974	1.974	tr|J3KPM2|J3KPM2_HUMAN	Leukocyte immunoglobulin-like receptor subfamily A member 3 OS=Homo sapiens GN=LILRA3 PE=4 SV=1	HUMAN	1	0.633614					0.687516
686	2.01	2.03	8.117	5.195	5.195	sp|Q99988|GDF15_HUMAN	Growth/differentiation factor 15 OS=Homo sapiens GN=GDF15 PE=1 SV=3	HUMAN	1	0.820845					0.680531
687	2.01	2.02	17.62	10.57	3.524	tr|Q6ZS74|Q6ZS74_HUMAN	Ras-related protein Ral-B OS=Homo sapiens GN=RALB PE=2 SV=1	HUMAN	1	1.49451					3.29088
688	2.01	2.02	42.37	9.322	9.322	sp|O75348|VATG1_HUMAN	V-type proton ATPase subunit G 1 OS=Homo sapiens GN=ATP6V1G1 PE=1 SV=3	HUMAN	1	0.948261					1.24533
689	2.01	2.01	19.65	6.55	6.55	tr|D6RA08|D6RA08_HUMAN	Complement C1q subcomponent subunit B (Fragment) OS=Homo sapiens GN=C1QB PE=4 SV=1	HUMAN	1	0.411729					0.458922
690	2.01	2.01	13.18	13.18	6.977	sp|P01824|HV206_HUMAN	Ig heavy chain V-II region WAH OS=Homo sapiens PE=1 SV=1	HUMAN	5	0.315312					0.535887
691	2	36.25	47.92	39.06	33.16	tr|G3XAM2|G3XAM2_HUMAN	Complement factor I OS=Homo sapiens GN=CFI PE=3 SV=1	HUMAN	33
692	2	6.11	12.61	4.928	4.928	sp|O95436|NPT2B_HUMAN	Sodium-dependent phosphate transport protein 2B OS=Homo sapiens GN=SLC34A2 PE=1 SV=3	HUMAN	3	2.67766					3.06737
693	2	5.66	22.55	12.42	12.42	tr|F8VSB5|F8VSB5_HUMAN	Heterogeneous nuclear ribonucleoprotein A1 OS=Homo sapiens GN=HNRNPA1 PE=4 SV=1	HUMAN	4	1.77172					1.37025
694	2	2.98	20.51	12.82	12.82	sp|P49006|MRP_HUMAN	MARCKS-related protein OS=Homo sapiens GN=MARCKSL1 PE=1 SV=2	HUMAN	2	0.935143					1.26408
695	2	2.65	6.897	6.897	6.897	sp|O76096|CYTF_HUMAN	Cystatin-F OS=Homo sapiens GN=CST7 PE=1 SV=1	HUMAN	2
696	2	2.23	9.444	1.994	1.364	sp|P53618|COPB_HUMAN	Coatomer subunit beta OS=Homo sapiens GN=COPB1 PE=1 SV=3	HUMAN	1	0.542363					0.724463
697	2	2.22	10.25	3.058	1.259	sp|P07686|HEXB_HUMAN	Beta-hexosaminidase subunit beta OS=Homo sapiens GN=HEXB PE=1 SV=3	HUMAN	1	0.705339					1.04898
698	2	2.21	13.64	4.16	2.496	sp|Q9BW04|SARG_HUMAN	Specifically androgen-regulated gene protein OS=Homo sapiens GN=SARG PE=1 SV=2	HUMAN	1
699	2	2.16	15.37	4.009	2.673	tr|J3KNE5|J3KNE5_HUMAN	Histidine--tRNA ligase, cytoplasmic OS=Homo sapiens GN=HARS PE=4 SV=1	HUMAN	1	2.34906					1.27989
700	2	2.15	17.97	8.295	5.991	sp|P62906|RL10A_HUMAN	60S ribosomal protein L10a OS=Homo sapiens GN=RPL10A PE=1 SV=2	HUMAN	1	0.761355					0.975073
701	2	2.14	7.977	2.724	1.751	tr|F5GY20|F5GY20_HUMAN	Transmembrane glycoprotein NMB OS=Homo sapiens GN=GPNMB PE=4 SV=1	HUMAN	1	0.582983					0.522115
702	2	2.12	8.661	4.199	2.625	sp|P12277|KCRB_HUMAN	Creatine kinase B-type OS=Homo sapiens GN=CKB PE=1 SV=1	HUMAN	1	0.996659					0.699712
703	2	2.11	10.31	2.335	1.265	sp|P12109|CO6A1_HUMAN	Collagen alpha-1(VI) chain OS=Homo sapiens GN=COL6A1 PE=1 SV=3	HUMAN	1	0.830318					0.662185
704	2	2.11	28.35	6.701	6.701	sp|P07305|H10_HUMAN	Histone H1.0 OS=Homo sapiens GN=H1F0 PE=1 SV=3	HUMAN	1	0.743688					1.1599
705	2	2.1	5.453	1.337	1.337	sp|P07333|CSF1R_HUMAN	Macrophage colony-stimulating factor 1 receptor OS=Homo sapiens GN=CSF1R PE=1 SV=2	HUMAN	2	0.578686					0.648159
706	2	2.1	18.18	8.134	5.024	sp|P61158|ARP3_HUMAN	Actin-related protein 3 OS=Homo sapiens GN=ACTR3 PE=1 SV=3	HUMAN	1	0.766448					0.983493
707	2	2.1	8.18	5.317	3.067	sp|Q9BR76|COR1B_HUMAN	Coronin-1B OS=Homo sapiens GN=CORO1B PE=1 SV=1	HUMAN	1	1.81045					1.03709
708	2	2.1	23	14	11.5	sp|P61026|RAB10_HUMAN	Ras-related protein Rab-10 OS=Homo sapiens GN=RAB10 PE=1 SV=1	HUMAN	2	1.19599					2.36851
709	2	2.09	6.037	2.625	2.625	sp|P26022|PTX3_HUMAN	Pentraxin-related protein PTX3 OS=Homo sapiens GN=PTX3 PE=1 SV=3	HUMAN	1	0.954482					0.586467
710	2	2.08	6.604	2.264	1.321	sp|O43865|SAHH2_HUMAN	Putative adenosylhomocysteinase 2 OS=Homo sapiens GN=AHCYL1 PE=1 SV=2	HUMAN	1
711	2	2.08	4.965	1.891	1.891	tr|B5MBX2|B5MBX2_HUMAN	Transcobalamin-2 OS=Homo sapiens GN=TCN2 PE=4 SV=1	HUMAN	1	1.43189					2.22742
712	2	2.08	18.9	12.6	8.661	sp|P53999|TCP4_HUMAN	Activated RNA polymerase II transcriptional coactivator p15 OS=Homo sapiens GN=SUB1 PE=1 SV=3	HUMAN	1	1.0546					0.969393
713	2	2.08	8.844	6.122	6.122	sp|P04438|HV208_HUMAN	Ig heavy chain V-II region SESS OS=Homo sapiens PE=2 SV=1	HUMAN	2	0.189408					0.2436
714	2	2.07	17.19	7.163	5.444	sp|Q6IBS0|TWF2_HUMAN	Twinfilin-2 OS=Homo sapiens GN=TWF2 PE=1 SV=2	HUMAN	1	0.895399					1.2473
715	2	2.07	6.034	3.017	1.724	tr|B4DKT0|B4DKT0_HUMAN	Golgi reassembly-stacking protein 2 OS=Homo sapiens GN=GORASP2 PE=2 SV=1	HUMAN	1	1.94046					2.17145
716	2	2.06	19.93	5.435	5.435	sp|Q86Y82|STX12_HUMAN	Syntaxin-12 OS=Homo sapiens GN=STX12 PE=1 SV=1	HUMAN	1	0.564712					0.698371
717	2	2.04	8.832	1.994	1.994	tr|G5E9G0|G5E9G0_HUMAN	60S ribosomal protein L3 OS=Homo sapiens GN=RPL3 PE=2 SV=1	HUMAN	1	1.21101					1.04501
718	2	2.04	5.072	1.691	1.691	sp|P05107|ITB2_HUMAN	Integrin beta-2 OS=Homo sapiens GN=ITGB2 PE=1 SV=2	HUMAN	1	0.588969					0.587965
719	2	2.04	29.27	11.38	11.38	sp|Q9BRA2|TXD17_HUMAN	Thioredoxin domain-containing protein 17 OS=Homo sapiens GN=TXNDC17 PE=1 SV=1	HUMAN	1	1.15276					0.960278
720	2	2.04	8.896	4.908	2.761	sp|O00602|FCN1_HUMAN	Ficolin-1 OS=Homo sapiens GN=FCN1 PE=1 SV=2	HUMAN	1	1.09798					1.60681
721	2	2.04	20.16	16.28	10.85	tr|Q5SRP5|Q5SRP5_HUMAN	Apolipoprotein M OS=Homo sapiens GN=APOM PE=4 SV=1	HUMAN	1	0.169818					0.258185
722	2	2.03	7.682	1.235	1.235	tr|G5E9B4|G5E9B4_HUMAN	Adenosine deaminase, RNA-specific, B1 (RED1 homolog rat), isoform CRA_a OS=Homo sapiens GN=ADARB1 PE=4 SV=1	HUMAN	1	0.110097					0.12842
723	2	2.03	6.147	2.128	2.128	sp|Q9NS68|TNR19_HUMAN	Tumor necrosis factor receptor superfamily member 19 OS=Homo sapiens GN=TNFRSF19 PE=1 SV=1	HUMAN	1	0.673849					1.31676
724	2	2.03	7.54	3.968	3.968	sp|O43291|SPIT2_HUMAN	Kunitz-type protease inhibitor 2 OS=Homo sapiens GN=SPINT2 PE=1 SV=2	HUMAN	1	1.02927					1.22956
725	2	2.03	7.661	4.435	4.435	tr|F8W8N6|F8W8N6_HUMAN	CD177 antigen OS=Homo sapiens GN=CD177 PE=4 SV=1	HUMAN	1	0.516327					0.651153
726	2	2.03	4.32	2.16	2.16	sp|Q6UXB8|PI16_HUMAN	Peptidase inhibitor 16 OS=Homo sapiens GN=PI16 PE=1 SV=1	HUMAN	1	0.286331					0.337693
727	2	2.03	7.059	5.098	5.098	tr|J3KNF4|J3KNF4_HUMAN	Copper chaperone for superoxide dismutase OS=Homo sapiens GN=CCS PE=4 SV=1	HUMAN	1	0.530465					0.635092
728	2	2.03	7.595	6.013	6.013	tr|H0YBZ2|H0YBZ2_HUMAN	HLA class II histocompatibility antigen gamma chain (Fragment) OS=Homo sapiens GN=CD74 PE=4 SV=1	HUMAN	1	0.618552					0.928937
729	2	2.02	8.03	3.939	2.879	sp|P08253|MMP2_HUMAN	72 kDa type IV collagenase OS=Homo sapiens GN=MMP2 PE=1 SV=2	HUMAN	1	0.846127					0.6777
730	2	2.02	8.051	3.602	3.602	tr|G8JLB6|G8JLB6_HUMAN	Heterogeneous nuclear ribonucleoprotein H OS=Homo sapiens GN=HNRNPH1 PE=4 SV=1	HUMAN	1	0.273302					0.443618
731	2	2.02	15.98	4.098	4.098	sp|Q99426|TBCB_HUMAN	Tubulin-folding cofactor B OS=Homo sapiens GN=TBCB PE=1 SV=2	HUMAN	1	4.55707					4.47107
732	2	2.02	15.12	8.14	8.14	sp|O95989|NUDT3_HUMAN	Diphosphoinositol polyphosphate phosphohydrolase 1 OS=Homo sapiens GN=NUDT3 PE=1 SV=1	HUMAN	1	0.804935					0.679308
733	2	2.02	31.03	9.483	9.483	tr|J3KTI2|J3KTI2_HUMAN	Migration and invasion enhancer 1 OS=Homo sapiens GN=MIEN1 PE=4 SV=1	HUMAN	1	1.01938					0.766601
734	2	2.02	5.894	2.846	2.846	sp|O60784|TOM1_HUMAN	Target of Myb protein 1 OS=Homo sapiens GN=TOM1 PE=1 SV=2	HUMAN	1	0.674735					2.09429
735	2	2.01	13.68	4.701	4.701	tr|J3KQE5|J3KQE5_HUMAN	GTP-binding nuclear protein Ran (Fragment) OS=Homo sapiens GN=RAN PE=4 SV=1	HUMAN	1	1.23045					1.1874
736	2	2.01	20.3	3.881	3.881	sp|Q03405|UPAR_HUMAN	Urokinase plasminogen activator surface receptor OS=Homo sapiens GN=PLAUR PE=1 SV=1	HUMAN	1	1.78266					1.18428
737	2	2.01	16.52	7.826	7.826	tr|E7EPV7|E7EPV7_HUMAN	Alpha-synuclein OS=Homo sapiens GN=SNCA PE=4 SV=1	HUMAN	1	0.559395					0.302081
738	2	2.01	8.865	7.092	4.965	sp|Q07021|C1QBP_HUMAN	Complement component 1 Q subcomponent-binding protein, mitochondrial OS=Homo sapiens GN=C1QBP PE=1 SV=1	HUMAN	1	0.468106					0.624293
739	2	2.01	21.79	14.74	14.74	tr|E9PM92|E9PM92_HUMAN	Protein C11orf58 (Fragment) OS=Homo sapiens GN=C11orf58 PE=4 SV=1	HUMAN	1	0.606224					1.87389
740	2	2.01	7.843	3.922	3.922	sp|Q96N03|VTM2L_HUMAN	V-set and transmembrane domain-containing protein 2-like protein OS=Homo sapiens GN=VSTM2L PE=1 SV=1	HUMAN	1	0.718952					0.907677
741	2	2.01	10.77	6.667	6.667	sp|P55957|BID_HUMAN	BH3-interacting domain death agonist OS=Homo sapiens GN=BID PE=1 SV=1	HUMAN	1	0.155042					0.37841
742	2	2.01	40.51	40.51	40.51	sp|P00995|ISK1_HUMAN	Pancreatic secretory trypsin inhibitor OS=Homo sapiens GN=SPINK1 PE=1 SV=2	HUMAN	2	0.86114					0.599547
743	2	2.01	4.762	3.175	3.175	tr|Q5JNW7|Q5JNW7_HUMAN	Proteasome (Prosome, macropain) subunit beta type 8 (Large multifunctional protease 7) OS=Homo sapiens GN=PSMB8 PE=4 SV=1	HUMAN	1	0.952975					0.578901
744	2	2	9.816	9.816	3.067	tr|D3DU85|D3DU85_HUMAN	Na(+)/H(+) exchange regulatory cofactor NHE-RF2 OS=Homo sapiens GN=SLC9A3R2 PE=4 SV=1	HUMAN	1	1.85441					1.46594
745	2	2	12.02	5.464	5.464	sp|P61081|UBC12_HUMAN	NEDD8-conjugating enzyme Ubc12 OS=Homo sapiens GN=UBE2M PE=1 SV=1	HUMAN	1	0.88079					1.3875
746	2	2	18.13	7.5	7.5	sp|P12724|ECP_HUMAN	Eosinophil cationic protein OS=Homo sapiens GN=RNASE3 PE=1 SV=2	HUMAN	1	1.80783					3.64254
747	2	2	19.15	5.674	5.674	sp|P01036|CYTS_HUMAN	Cystatin-S OS=Homo sapiens GN=CST4 PE=1 SV=3	HUMAN	1	0.394336					0.708256
748	2	2	10.99	9.89	9.89	tr|E9PB55|E9PB55_HUMAN	Homeodomain-only protein OS=Homo sapiens GN=HOPX PE=3 SV=1	HUMAN	1	2.70516					1.09769
749	2	2	7.752	7.752	7.752	sp|Q9NP84|TNR12_HUMAN	Tumor necrosis factor receptor superfamily member 12A OS=Homo sapiens GN=TNFRSF12A PE=1 SV=1	HUMAN	1	1.07578					0.835913
750	2	2	10.98	6.358	6.358	sp|Q96FE7-4|P3IP1_HUMAN	Isoform 4 of Phosphoinositide-3-kinase-interacting protein 1 OS=Homo sapiens GN=PIK3IP1	HUMAN	1	0.376731					0.546983
751	2	2	9.868	7.237	7.237	sp|P62269|RS18_HUMAN	40S ribosomal protein S18 OS=Homo sapiens GN=RPS18 PE=1 SV=3	HUMAN	1	1.14228					3.11245
752	2	2	3.814	3.814	3.814	tr|C9JAF2|C9JAF2_HUMAN	Insulin-like growth factor II Ala-25 Del OS=Homo sapiens GN=IGF2 PE=3 SV=2	HUMAN	1	0.390654					0.0155885
753	2	2	5.556	5.556	5.556	sp|Q9NP99|TREM1_HUMAN	Triggering receptor expressed on myeloid cells 1 OS=Homo sapiens GN=TREM1 PE=1 SV=1	HUMAN	1	0.787062					0.58397
754	2	2	9.434	9.434	9.434	sp|Q9GZP8|IMUP_HUMAN	Immortalization up-regulated protein OS=Homo sapiens GN=IMUP PE=1 SV=1	HUMAN	1	2.69522					1.93899
755	2	2	10.39	10.39	10.39	sp|Q969E1|LEAP2_HUMAN	Liver-expressed antimicrobial peptide 2 OS=Homo sapiens GN=LEAP2 PE=1 SV=1	HUMAN	1	0.837886					0.701938
756	2	2	7.826	7.826	7.826	sp|Q02747|GUC2A_HUMAN	Guanylin OS=Homo sapiens GN=GUCA2A PE=1 SV=2	HUMAN	1	0.35962					0.332479
757	2	2	5.415	5.415	5.415	sp|P16152|CBR1_HUMAN	Carbonyl reductase [NADPH] 1 OS=Homo sapiens GN=CBR1 PE=1 SV=3	HUMAN	1	1.01341					0.855023
758	1.97	2.12	5.968	1.592	0.9284	sp|P11217-2|PYGM_HUMAN	Isoform 2 of Glycogen phosphorylase, muscle form OS=Homo sapiens GN=PYGM	HUMAN	1
759	1.97	2.11	8.414	4.207	2.589	sp|P67775|PP2AA_HUMAN	Serine/threonine-protein phosphatase 2A catalytic subunit alpha isoform OS=Homo sapiens GN=PPP2CA PE=1 SV=1	HUMAN	1	1.94889					1.28509
760	1.96	1.98	9.438	5.393	3.82	tr|C9JGI3|C9JGI3_HUMAN	Thymidine phosphorylase (Fragment) OS=Homo sapiens GN=TYMP PE=4 SV=1	HUMAN	1	0.76544					1.58068
761	1.95	2.07	16.83	6.436	6.436	sp|P54819-3|KAD2_HUMAN	Isoform 3 of Adenylate kinase 2, mitochondrial OS=Homo sapiens GN=AK2	HUMAN	1	1.21772					0.438793
762	1.94	1.96	20.21	8.156	8.156	sp|P82970|HMGN5_HUMAN	High mobility group nucleosome-binding domain-containing protein 5 OS=Homo sapiens GN=HMGN5 PE=1 SV=1	HUMAN	4	0.67803					1.02144
763	1.93	16.86	31.86	22.71	14.24	sp|P13647|K2C5_HUMAN	Keratin, type II cytoskeletal 5 OS=Homo sapiens GN=KRT5 PE=1 SV=3	HUMAN	13	1.05054	0.784912	1.97622	0.531592	2.0761	1.25047	0.622344	5.2988	0.235991	6.62599
764	1.92	2.59	13.52	11.48	9.016	tr|J3KQY0|J3KQY0_HUMAN	Folate receptor gamma OS=Homo sapiens GN=FOLR3 PE=4 SV=1	HUMAN	2	0.192959					0.167625
765	1.92	2.38	7.399	0.8221	0.4604	tr|E9PGC8|E9PGC8_HUMAN	MAP1A heavy chain OS=Homo sapiens GN=MAP1A PE=4 SV=1	HUMAN	1	1.24592					3.17843
766	1.92	1.93	11.93	6.25	6.25	sp|P31025|LCN1_HUMAN	Lipocalin-1 OS=Homo sapiens GN=LCN1 PE=1 SV=1	HUMAN	1	1.93362					0.70275
767	1.89	2.03	5.145	3.132	2.013	tr|J3KN09|J3KN09_HUMAN	Chitotriosidase-1 OS=Homo sapiens GN=CHIT1 PE=3 SV=1	HUMAN	1	2.77421					2.80988
768	1.89	1.91	9.223	4.854	4.854	sp|P30043|BLVRB_HUMAN	Flavin reductase (NADPH) OS=Homo sapiens GN=BLVRB PE=1 SV=3	HUMAN	1	1.19652					0.501313
769	1.86	1.93	5.484	4.205	3.291	sp|P32942|ICAM3_HUMAN	Intercellular adhesion molecule 3 OS=Homo sapiens GN=ICAM3 PE=1 SV=2	HUMAN	1	0.60968					0.922222
770	1.84	1.9	18.97	3.59	3.59	tr|D6RFW1|D6RFW1_HUMAN	Small glutamine-rich tetratricopeptide repeat-containing protein beta (Fragment) OS=Homo sapiens GN=SGTB PE=4 SV=1	HUMAN	1
771	1.83	1.87	22.45	12.24	12.24	sp|Q99584|S10AD_HUMAN	Protein S100-A13 OS=Homo sapiens GN=S100A13 PE=1 SV=1	HUMAN	1	0.880955					0.569667
772	1.82	2.03	15.54	2.053	2.053	sp|Q9Y376|CAB39_HUMAN	Calcium-binding protein 39 OS=Homo sapiens GN=CAB39 PE=1 SV=1	HUMAN	1	2.62538					3.0558
773	1.82	1.9	14.41	3.493	3.493	tr|G3V141|G3V141_HUMAN	Collagen triple helix repeat containing 1, isoform CRA_c OS=Homo sapiens GN=CTHRC1 PE=4 SV=1	HUMAN	1	1.95913					1.30747
774	1.79	2.08	14.01	4.066	1.958	sp|Q14515|SPRL1_HUMAN	SPARC-like protein 1 OS=Homo sapiens GN=SPARCL1 PE=1 SV=2	HUMAN	1	0.922737	0.781184	17.3659	0.0531351	16.0241	0.847946	0.796558	562.966	0.00150621	477.364
775	1.78	2.48	12.47	3.846	1.632	sp|Q5T0F9|C2D1B_HUMAN	Coiled-coil and C2 domain-containing protein 1B OS=Homo sapiens GN=CC2D1B PE=1 SV=1	HUMAN	2	0.721903					0.823457
776	1.78	2.36	27.68	12.43	4.52	tr|H0YN26|H0YN26_HUMAN	Acidic leucine-rich nuclear phosphoprotein 32 family member A OS=Homo sapiens GN=ANP32A PE=4 SV=1	HUMAN	1	0.841535					0.826996
777	1.78	1.79	12.5	3.804	3.804	sp|Q04760|LGUL_HUMAN	Lactoylglutathione lyase OS=Homo sapiens GN=GLO1 PE=1 SV=4	HUMAN	1	0.855203	0.361957	3.5603	0.240205	3.04478	0.546788	0.412679	333.564	0.00163923	182.389
778	1.77	1.77	18.03	18.03	18.03	tr|E5RJX2|E5RJX2_HUMAN	40S ribosomal protein S20 OS=Homo sapiens GN=RPS20 PE=4 SV=1	HUMAN	1	1.05336					1.63961
779	1.74	2.07	16.43	3.111	0.5065	sp|Q14152|EIF3A_HUMAN	Eukaryotic translation initiation factor 3 subunit A OS=Homo sapiens GN=EIF3A PE=1 SV=1	HUMAN	1	0.873743	0.639548	2.89424	0.30189	2.52883	1.15158	0.611898	2.77255	0.415352	3.19282
780	1.72	1.84	14.06	4.016	4.016	sp|P62753|RS6_HUMAN	40S ribosomal protein S6 OS=Homo sapiens GN=RPS6 PE=1 SV=1	HUMAN	1	0.468533					0.508179
781	1.71	1.93	11.94	3.044	1.639	sp|O75955|FLOT1_HUMAN	Flotillin-1 OS=Homo sapiens GN=FLOT1 PE=1 SV=3	HUMAN	1	0.914634					2.67334
782	1.7	1.77	7.39	3.002	1.617	sp|Q99538|LGMN_HUMAN	Legumain OS=Homo sapiens GN=LGMN PE=1 SV=1	HUMAN	1	1.24959					1.07573
783	1.7	1.7	11.63	9.302	6.512	sp|P61106|RAB14_HUMAN	Ras-related protein Rab-14 OS=Homo sapiens GN=RAB14 PE=1 SV=4	HUMAN	1	0.892995					1.68631
784	1.67	1.92	13.79	6.101	2.122	sp|P16333|NCK1_HUMAN	Cytoplasmic protein NCK1 OS=Homo sapiens GN=NCK1 PE=1 SV=1	HUMAN	1	1.0442					2.19162
785	1.66	1.77	11.29	2.083	1.535	sp|Q92888|ARHG1_HUMAN	Rho guanine nucleotide exchange factor 1 OS=Homo sapiens GN=ARHGEF1 PE=1 SV=2	HUMAN	1	0.927603					1.35023
786	1.65	1.72	8.416	1.155	1.155	tr|E9PFQ7|E9PFQ7_HUMAN	Rho GTPase-activating protein 25 OS=Homo sapiens GN=ARHGAP25 PE=4 SV=1	HUMAN	1	1.56273					2.19754
787	1.64	1.64	7.407	7.407	7.407	sp|Q9HD89|RETN_HUMAN	Resistin OS=Homo sapiens GN=RETN PE=2 SV=1	HUMAN	1	0.101255					0.20796
788	1.62	1.74	23.15	5.145	3.537	sp|P07307|ASGR2_HUMAN	Asialoglycoprotein receptor 2 OS=Homo sapiens GN=ASGR2 PE=1 SV=2	HUMAN	1	0.648761					0.205082
789	1.62	1.7	9.434	7.925	6.038	sp|P55064|AQP5_HUMAN	Aquaporin-5 OS=Homo sapiens GN=AQP5 PE=1 SV=1	HUMAN	1	2.80983					7.07478
790	1.61	1.63	34.83	25.84	17.98	sp|P55774|CCL18_HUMAN	C-C motif chemokine 18 OS=Homo sapiens GN=CCL18 PE=1 SV=1	HUMAN	2	1.63049					0.98499
791	1.6	1.68	10.11	1.991	1.072	sp|P33908|MA1A1_HUMAN	Mannosyl-oligosaccharide 1,2-alpha-mannosidase IA OS=Homo sapiens GN=MAN1A1 PE=1 SV=3	HUMAN	1	0.795067					0.451465
792	1.6	1.62	16.81	7.522	3.097	sp|P22352|GPX3_HUMAN	Glutathione peroxidase 3 OS=Homo sapiens GN=GPX3 PE=1 SV=2	HUMAN	1	1.1197	0.463455	3.59818	0.311186	4.02889	0.376224	0.0651348	3.57974	0.105098	1.34678

## Sheet: HIgh abundance-Contaminants-mis
N	Unused	Total	%Cov	%Cov(50)	%Cov(95)	Accession	Name	Species	Peptides(95%)	115:114	PVal 115:114	EF 115:114	LowerCI 115:114	UpperCI 115:114	116:114	PVal 116:114	EF 116:114	LowerCI 116:114	UpperCI 116:114
1	294.84	294.84	93.6	91.95	91.13	sp|P02768|ALBU_HUMAN	Serum albumin OS=Homo sapiens GN=ALB PE=1 SV=2	HUMAN	762	0.0981904	1.20599e-08	2.02972	0.0483763	0.199299	0.526967	0.00240987	1.49989	0.351337	0.790392
2	173.58	173.58	85.41	79.43	74.16	sp|P01009|A1AT_HUMAN	Alpha-1-antitrypsin OS=Homo sapiens GN=SERPINA1 PE=1 SV=3	HUMAN	169	0.343888	8.72343e-07	1.42733	0.240931	0.490844	0.27604	9.50304e-11	1.31647	0.209682	0.363398
6	155.35	155.57	52.98	46.72	39.75	sp|P01024|CO3_HUMAN	Complement C3 OS=Homo sapiens GN=C3 PE=1 SV=2	HUMAN	102	0.341445	5.90519e-14	1.25464	0.272146	0.428392	0.441137	2.36627e-16	1.16292	0.379335	0.513009
9	119	119.05	73.07	67.48	61.75	sp|P02787|TRFE_HUMAN	Serotransferrin OS=Homo sapiens GN=TF PE=1 SV=?		122	0.0433168	6.30608e-26	1.31411	0.0329628	0.0569232	0.0977474	9.1407e-25	1.24166	0.0787232	0.121369
12	110.72	110.89	88.89	88.89	83.13	sp|TRY1_BOVIN			372	0.310271	1.32922e-09	1.21018	0.256386	0.375483	0.949907	0.848177	1.7546	0.541382	1.6667
14	106.45	106.95	83.74	74.14	72.41	sp|P00738|HPT_HUMAN	Haptoglobin OS=Homo sapiens GN=HP PE=1 SV=1	HUMAN	105	0.0852559	3.36831e-18	1.29502	0.0658337	0.110408	1.06849	0.775094	1.59962	0.667965	1.70919
18	94.21	94.6	47.49	38.6	31.34	sp|P01023|A2MG_HUMAN	Alpha-2-macroglobulin OS=Homo sapiens GN=A2M PE=1 SV=3	HUMAN	62	0.424144	1.49947e-10	1.1963	0.354547	0.507403	0.335959	1.64399e-12	1.20555	0.278677	0.405016
27	66.78	67	86.89	84.64	81.65	sp|P02647|APOA1_HUMAN	Apolipoprotein A-I OS=Homo sapiens GN=APOA1 PE=1 SV=1	HUMAN	44	0.171592	1.28022e-07	1.65719	0.103543	0.284361	0.149552	6.43999e-09	1.58894	0.0941206	0.237628
30	63.47	63.47	82.73	73.64	65.15	sp|P01857|IGHG1_HUMAN	Ig gamma-1 chain C region OS=Homo sapiens GN=IGHG1 PE=1 SV=1	HUMAN	125	0.262488					0.517894
39	53.27	53.33	90.57	80.19	80.19	sp|P01834|IGKC_HUMAN	Ig kappa chain C region OS=Homo sapiens GN=IGKC PE=1 SV=1	HUMAN	109	0.100885	0.0078498	4.49437	0.022447	0.453416	0.156746	0.0130682	3.83948	0.0408248	0.601823
44	50.18	51.82	66.16	56.06	54.04	sp|P06727|APOA4_HUMAN	Apolipoprotein A-IV OS=Homo sapiens GN=APOA4 PE=1 SV=3	HUMAN	32	0.233456	2.63148e-11	1.25943	0.185367	0.294022	0.217141	5.90618e-12	1.24985	0.173734	0.271394
47	47.26	47.26	68.66	58.21	50.75	sp|P02763|A1AG1_HUMAN	Alpha-1-acid glycoprotein 1 OS=Homo sapiens GN=ORM1 PE=1 SV=1	HUMAN	67	0.256415	0.00533214	1.98786	0.128991	0.509715	0.279553	0.0321196	2.99524	0.0933324	0.837327
56	42.74	42.78	68.27	57.79	53.82	sp|P01876|IGHA1_HUMAN	Ig alpha-1 chain C region OS=Homo sapiens GN=IGHA1 PE=1 SV=2	HUMAN	55	0.28806	0.110952	16.1886	0.017794	4.66331	0.320275	0.13244	21.1956	0.0151105	6.78842
64	37.7	40.52	16.72	6.838	4.383	sp|P04114|APOB_HUMAN	Apolipoprotein B-100 OS=Homo sapiens GN=APOB PE=1 SV=2	HUMAN	18	0.423909	3.42e-05	1.38457	0.306166	0.586934	0.596048	0.00634889	1.42036	0.419646	0.846602
67	36.86	37.2	47.35	44.91	39.16	sp|P01871|IGHM_HUMAN	Ig mu chain C region OS=Homo sapiens GN=IGHM PE=1 SV=3	HUMAN	42	0.109113	3.85358e-08	1.44078	0.075732	0.157207	0.131662	2.42921e-09	1.29316	0.101814	0.17026
68	36.77	36.97	58.13	46.42	37.74	tr|C9JC84|C9JC84_HUMAN	Fibrinogen gamma chain OS=Homo sapiens GN=FGG PE=4 SV=1	HUMAN	22	0.316544	5.20607e-10	1.16544	0.271609	0.368913	0.332825	4.23302e-06	1.37031	0.242882	0.456075
88	30.04	30.04	45.33	45.33	41.59	sp|B9A064|IGLL5_HUMAN	Immunoglobulin lambda-like polypeptide 5 OS=Homo sapiens GN=IGLL5 PE=2 SV=2	HUMAN	46	0.113135	0.0288804	3.51471	0.032189	0.397638	0.157661	0.0340998	3.51995	0.0447906	0.554959
108	25.74	25.8	34.83	31.36	26.68	sp|P02675|FIBB_HUMAN	Fibrinogen beta chain OS=Homo sapiens GN=FGB PE=1 SV=2	HUMAN	16	0.392443	5.67495e-05	1.34723	0.291296	0.528713	0.554843	0.00318286	1.39709	0.397141	0.775167
136	21.14	24.62	35.39	25.38	20.87	sp|P43652|AFAM_HUMAN	Afamin OS=Homo sapiens GN=AFM PE=1 SV=1	HUMAN	14	0.161205	5.32e-09	1.31325	0.122753	0.211704	0.861696	0.229774	1.29219	0.666849	1.11347
149	19.72	20.04	6.586	3.867	3.201	sp|Q9Y6R7|FCGBP_HUMAN	IgGFc-binding protein OS=Homo sapiens GN=FCGBP PE=1 SV=3	HUMAN	12	0.959724	0.835664	1.55634	0.616656	1.49365	0.991501	0.953754	1.38949	0.713574	1.37768
155	18.73	59.72	68.37	56.18	49.26	sp|ALBU_BOVIN			93	0.376932	0.0209145	2.19171	0.171981	0.826125	14.2232	0.000824011	3.24689	4.38056	46.181
174	16.04	52.36	78.83	71.78	58.28	sp|P01859|IGHG2_HUMAN	Ig gamma-2 chain C region OS=Homo sapiens GN=IGHG2 PE=1 SV=2	HUMAN	95	0.108521	0.0911221	58.3651	0.00185935	6.33385	0.196515	0.130347	73.1784	0.00268542	14.3806
175	15.96	16.22	28.32	22.31	22.31	sp|Q9Y279|VSIG4_HUMAN	V-set and immunoglobulin domain-containing protein 4 OS=Homo sapiens GN=VSIG4 PE=1 SV=1	HUMAN	12	1.14275	0.289283	1.30742	0.874051	1.49405	0.775024	0.193809	1.50764	0.514064	1.16846
190	14.52	14.52	32.03	27.34	22.14	sp|P01880|IGHD_HUMAN	Ig delta chain C region OS=Homo sapiens GN=IGHD PE=1 SV=2	HUMAN	10	1.50351	0.133621	1.79683	0.836754	2.70156	1.00848	0.924072	1.24179	0.812114	1.25232
223	11.82	11.87	49.06	42.14	28.3	sp|P01591|IGJ_HUMAN	Immunoglobulin J chain OS=Homo sapiens GN=IGJ PE=1 SV=4	HUMAN	10	0.714707	0.0314959	1.33276	0.53626	0.952533	0.714588	0.0159448	1.26164	0.566398	0.90155
228	11.27	11.31	50.43	39.32	37.61	sp|P06309|KV205_HUMAN	Ig kappa chain V-II region GM607 (Fragment) OS=Homo sapiens PE=4 SV=1	HUMAN	8	0.155697	0.0171948	2.89555	0.0537712	0.450827	0.262877	0.0122617	1.9013	0.138261	0.499808
237	10.86	10.91	62	41	22	sp|P02652|APOA2_HUMAN	Apolipoprotein A-II OS=Homo sapiens GN=APOA2 PE=1 SV=1	HUMAN	5	0.232569	0.000455339	1.58549	0.146685	0.368737	0.195476	0.000286899	1.59641	0.122447	0.312059
268	9.54	30	77.36	77.36	69.81	sp|P0CG05|LAC2_HUMAN	Ig lambda-2 chain C regions OS=Homo sapiens GN=IGLC2 PE=1 SV=1	HUMAN	51	0.130145	0.327205	2253012	5.77648e-08	293218	0.168567	0.214959	2814.81	5.98857e-05	474.483
273	9.15	9.15	52.25	52.25	45.05	sp|P80748|LV302_HUMAN	Ig lambda chain V-III region LOI OS=Homo sapiens PE=1 SV=1	HUMAN	11	0.13857	0.0337959	3.79754	0.0364895	0.526226	0.197815	0.0430393	4.03122	0.0490708	0.797438
274	9.09	24.15	71.14	58.21	47.26	sp|P19652|A1AG2_HUMAN	Alpha-1-acid glycoprotein 2 OS=Homo sapiens GN=ORM2 PE=1 SV=2	HUMAN	27	0.238848	0.018323	2.64177	0.0904122	0.63098	0.281638	0.0282814	2.7504	0.102399	0.774618
295	8.13	8.13	59.13	59.13	46.96	sp|P01767|HV306_HUMAN	Ig heavy chain V-III region BUT OS=Homo sapiens PE=1 SV=1	HUMAN	11
339	6.54	6.97	41.03	37.61	37.61	sp|P01602|KV110_HUMAN	Ig kappa chain V-I region HK102 (Fragment) OS=Homo sapiens GN=IGKV1-5 PE=4 SV=1	HUMAN	11	0.161133					0.317946
341	6.48	7.36	78.07	64.04	51.75	sp|P01625|KV402_HUMAN	Ig kappa chain V-IV region Len OS=Homo sapiens PE=1 SV=2	HUMAN	11	0.110874	0.000596301	1.57591	0.0703554	0.174727	0.183418	0.000577038	1.41464	0.129657	0.259471
353	6.04	45.22	84.08	73.74	53.58	sp|P01860|IGHG3_HUMAN	Ig gamma-3 chain C region OS=Homo sapiens GN=IGHG3 PE=1 SV=2	HUMAN	55	0.134372	0.0315424	3.54172	0.0379396	0.475907	0.165784	0.139358	160.732	0.00103143	26.6469
359	6.01	8.03	32.48	25.64	25.64	sp|P01743|HV102_HUMAN	Ig heavy chain V-I region HG3 OS=Homo sapiens PE=4 SV=1	HUMAN	25	0.181373	0.00582445	1.75611	0.103281	0.318511	0.246699	0.00406566	1.46988	0.167836	0.362618
381	5.37	5.37	17.07	17.07	17.07	sp|A6NJ16|IV4F8_HUMAN	Putative V-set and immunoglobulin domain-containing-like protein IGHV4OR15-8 OS=Homo sapiens GN=IGHV4OR15-8 PE=5 SV=2	HUMAN	5	0.118357					0.2453
430	4.15	6.39	63.79	63.79	45.69	sp|P01781|HV320_HUMAN	Ig heavy chain V-III region GAL OS=Homo sapiens PE=1 SV=1	HUMAN	10	0.137637	0.135734	233.999	0.000588198	32.2069	0.237942	0.150917	82.0561	0.00289975	19.5246
437	4.11	6.13	34.62	30.77	25.38	sp|P06316|LV107_HUMAN	Ig lambda chain V-I region BL2 OS=Homo sapiens PE=2 SV=1	HUMAN	9	0.150048	0.0166807	2.90824	0.0515942	0.436375	0.220203	0.0100669	1.93148	0.114007	0.425318
451	4.07	4.13	46.3	38.89	38.89	sp|P01608|KV116_HUMAN	Ig kappa chain V-I region Roy OS=Homo sapiens PE=1 SV=1	HUMAN	14	0.14814					0.194723
463	4.02	6.7	57.26	53.85	39.32	sp|P01764|HV303_HUMAN	Ig heavy chain V-III region VH26 OS=Homo sapiens PE=1 SV=1	HUMAN	21	0.204397					0.352377
472	4	6.22	36.51	36.51	27.78	sp|P01772|HV311_HUMAN	Ig heavy chain V-III region KOL OS=Homo sapiens PE=1 SV=1	HUMAN	11
479	4	4.02	25.34	19.18	15.07	sp|P06331|HV209_HUMAN	Ig heavy chain V-II region ARH-77 OS=Homo sapiens PE=4 SV=1	HUMAN	6	0.179884					0.337516
489	3.97	4.03	42.06	34.58	34.58	sp|P01717|LV403_HUMAN	Ig lambda chain V-IV region Hil OS=Homo sapiens PE=1 SV=1	HUMAN	6	0.287269					0.385036
496	3.85	3.87	29.02	24.11	15.63	sp|CASB_BOVIN			3	1.57774	0.763796	301.168	0.00523872	475.164	1.475	0.866981	6708.73	0.000219863	9895.37
498	3.8	7.96	49.61	45.74	27.91	sp|P18136|KV313_HUMAN	Ig kappa chain V-III region HIC OS=Homo sapiens PE=2 SV=2	HUMAN	11	0.185039					0.225743
520	3.28	3.53	26.64	14.95	12.15	sp|CAS1_BOVIN			2	1.76412	0.142935	5.19217	0.339765	9.1596	0.613237	0.201026	7.61333	0.0805477	4.66878
534	2.96	5.58	28.57	28.57	24.11	sp|P01721|LV601_HUMAN	Ig lambda chain V-VI region AR OS=Homo sapiens PE=1 SV=1	HUMAN	6	0.165821					0.27798
580	2.2	3.02	7.958	0.156	0.156	RRRRRsp|Q9NYC9|DYH9_HUMAN	REVERSED Dynein heavy chain 9, axonemal OS=Homo sapiens GN=DNAH9 PE=1 SV=3	HUMAN	1	1.10481					0.664726
594	2.1	50.81	80.73	71.87	58.72	sp|P01861|IGHG4_HUMAN	Ig gamma-4 chain C region OS=Homo sapiens GN=IGHG4 PE=1 SV=1	HUMAN	103	0.0524687					0.104069
619	2.05	2.29	10.83	1.62	0.682	RRRRRsp|Q2M389|WASH7_HUMAN	REVERSED WASH complex subunit 7 OS=Homo sapiens GN=KIAA1033 PE=1 SV=2	HUMAN	1	0.142737					0.271416
634	2.03	3.76	57.39	53.04	36.52	sp|P04433|KV309_HUMAN	Ig kappa chain V-III region VG (Fragment) OS=Homo sapiens PE=1 SV=1	HUMAN	11	0.101812					0.181035
644	2.03	2.12	11.51	1.79	1.79	RRRRRsp|Q8N6V9|TEX9_HUMAN	REVERSED Testis-expressed sequence 9 protein OS=Homo sapiens GN=TEX9 PE=2 SV=1	HUMAN	1	2.31329					2.04516
651	2.02	4.66	58.33	54.17	38.33	sp|P01766|HV305_HUMAN	Ig heavy chain V-III region BRO OS=Homo sapiens PE=1 SV=1	HUMAN	21
656	2.02	2.11	37.04	24.07	23.15	sp|P01714|LV301_HUMAN	Ig lambda chain V-III region SH OS=Homo sapiens PE=1 SV=1	HUMAN	2	0.154589					0.293311
658	2.02	2.09	18.37	12.65	8.571	sp|CTRA_BOVIN			1	0.459293					0.977486
665	2.01	30.87	65.88	53.53	46.47	sp|P01877|IGHA2_HUMAN	Ig alpha-2 chain C region OS=Homo sapiens GN=IGHA2 PE=1 SV=3	HUMAN	37	0.339884					0.74245
690	2.01	2.01	13.18	13.18	6.977	sp|P01824|HV206_HUMAN	Ig heavy chain V-II region WAH OS=Homo sapiens PE=1 SV=1	HUMAN	5	0.315312					0.535887
713	2	2.08	8.844	6.122	6.122	sp|P04438|HV208_HUMAN	Ig heavy chain V-II region SESS OS=Homo sapiens PE=2 SV=1	HUMAN	2	0.189408					0.2436
60	38.83	40.97	36.82	33.05	30.82	sp|P13645|K1C10_HUMAN	Keratin, type I cytoskeletal 10 OS=Homo sapiens GN=KRT10 PE=1 SV=6	HUMAN	25	0.672836	3.53096e-05	1.15348	0.583308	0.776104	0.535884	3.41002e-07	1.16039	0.461812	0.621836
78	34.68	37.2	34.47	30.12	24.69	sp|P04264|K2C1_HUMAN	Keratin, type II cytoskeletal 1 OS=Homo sapiens GN=KRT1 PE=1 SV=6	HUMAN	22	0.766909	0.00115878	1.12644	0.680824	0.863878	0.719926	0.00278717	1.18836	0.605816	0.85553
160	18.23	20.71	26.65	22.15	16.37	sp|P35527|K1C9_HUMAN	Keratin, type I cytoskeletal 9 OS=Homo sapiens GN=KRT9 PE=1 SV=3	HUMAN	12	0.816275	0.065141	1.25445	0.650701	1.02398	1.02644	0.827663	1.4189	0.723407	1.45642
343	6.4	10.31	29.75	23.75	15	sp|P08727|K1C19_HUMAN	Keratin, type I cytoskeletal 19 OS=Homo sapiens GN=KRT19 PE=1 SV=4	HUMAN	6	2.33893					0.66194
416	4.44	9.02	33.48	22.6	15.99	sp|P08729|K2C7_HUMAN	Keratin, type II cytoskeletal 7 OS=Homo sapiens GN=KRT7 PE=1 SV=5	HUMAN	10	1.65921	0.133047	3.91366	0.423954	6.49359	0.875965	0.463187	4.47491	0.19575	3.91987
169	17.4	28.32	41.1	32.49	28.18	tr|F8VXB4|F8VXB4_HUMAN	Keratin, type II cytoskeletal 8 OS=Homo sapiens GN=KRT8 PE=3 SV=1	HUMAN	19	2.05929	0.014818	1.66437	1.23728	3.42743	1.16777	0.124061	1.241	0.940993	1.4492
605	2.07	10.91	19.92	15.68	10.59	sp|P02533|K1C14_HUMAN	Keratin, type I cytoskeletal 14 OS=Homo sapiens GN=KRT14 PE=1 SV=4	HUMAN	6	0.684739					0.63304
763	1.93	16.86	31.86	22.71	14.24	sp|P13647|K2C5_HUMAN	Keratin, type II cytoskeletal 5 OS=Homo sapiens GN=KRT5 PE=1 SV=3	HUMAN	13	1.05054	0.784912	1.97622	0.531592	2.0761	1.25047	0.622344	5.2988	0.235991	6.62599
195	14.2	28.11	35.52	27.07	24.41	sp|P35908|K22E_HUMAN	Keratin, type II cytoskeletal 2 epidermal OS=Homo sapiens GN=KRT2 PE=1 SV=2	HUMAN	18	0.792425	0.0489094	1.26003	0.628896	0.998475	0.526402	0.0012759	1.31803	0.399387	0.693812

## Sheet: BALF Proteome
N	Unused	Total	%Cov	%Cov(50)	%Cov(95)	Accession	Name	Species	Peptides (95%)	115:114	PVal 115:114	EF 115:114	LowerCI 115:114	UpperCI 115:114	116:114	PVal 116:114	EF 116:114	LowerCI 116:114	UpperCI 116:114
3	171.21	171.57	53.24	47.87	41.86	tr|B4E1Z4|B4E1Z4_HUMAN	Complement factor B OS=Homo sapiens GN=CFB PE=2 SV=1	HUMAN	120	1.0198	0.736124	1.12424	0.907104	1.14651	0.943722	0.359249	1.13484	0.83159	1.07097
4	170.25	170.3	84.38	72.77	63.39	tr|G3V5I3|G3V5I3_HUMAN	Alpha-1-antichymotrypsin OS=Homo sapiens GN=SERPINA3 PE=3 SV=1	HUMAN	236	1.01316	0.9094	1.26347	0.801881	1.2801	0.479387	1.41659e-07	1.23605	0.387838	0.592547
5	156.68	156.68	63.1	54.46	52.96	sp|P00450|CERU_HUMAN	Ceruloplasmin OS=Homo sapiens GN=CP PE=1 SV=1	HUMAN	116	0.843558	0.0242811	1.15818	0.72835	0.97699	0.443946	1.38109e-17	1.11925	0.396644	0.496889
7	137.82	137.82	61.98	57.92	53.94	sp|P08603|CFAH_HUMAN	Complement factor H OS=Homo sapiens GN=CFH PE=1 SV=4	HUMAN	104	0.631855	5.64644e-09	1.13055	0.558893	0.714341	0.425135	2.31697e-06	1.36243	0.312041	0.579218
8	131.49	131.67	52.97	42.11	31.73	sp|Q09666|AHNK_HUMAN	Neuroblast differentiation-associated protein AHNAK OS=Homo sapiens GN=AHNAK PE=1 SV=2	HUMAN	123	0.836164	4.26483e-05	1.08459	0.770952	0.906892	0.543254	1.45746e-18	1.10268	0.492665	0.599037
10	117.94	118.11	69.44	61.25	52.69	sp|P06396|GELS_HUMAN	Gelsolin OS=Homo sapiens GN=GSN PE=1 SV=1	HUMAN	96	1.1354	0.187762	1.2116	0.937102	1.37565	0.525529	3.96828e-10	1.16279	0.451957	0.611077
11	113.6	113.6	73.16	65.8	61.26	sp|P02790|HEMO_HUMAN	Hemopexin OS=Homo sapiens GN=HPX PE=1 SV=2	HUMAN	125	0.301355	2.55329e-15	1.18448	0.254419	0.35695	0.272201	2.96435e-13	1.24587	0.218483	0.339128
13	108.37	108.7	33.6	27.2	25.51	tr|Q5HY54|Q5HY54_HUMAN	Filamin-A OS=Homo sapiens GN=FLNA PE=2 SV=1	HUMAN	62	1.30876	0.000140771	1.13973	1.14831	1.49163	1.53611	1.20425e-05	1.19342	1.28715	1.83322
15	103.62	103.8	60.99	53.53	49.35	sp|P01833|PIGR_HUMAN	Polymeric immunoglobulin receptor OS=Homo sapiens GN=PIGR PE=1 SV=4	HUMAN	106	2.16866	2.47176e-08	1.22452	1.77104	2.65556	2.80634	8.26802e-08	1.33443	2.10303	3.74486
16	101.44	101.44	82.13	75.47	73.33	sp|P60709|ACTB_HUMAN	Actin, cytoplasmic 1 OS=Homo sapiens GN=ACTB PE=1 SV=1	HUMAN	86	1.44042	0.0318794	1.38971	1.03649	2.00176	1.70952	0.0122548	1.4959	1.1428	2.55727
17	95.18	96	17.21	15.25	12.51	tr|E9PBJ0|E9PBJ0_HUMAN	Mucin-5B OS=Homo sapiens GN=MUC5B PE=4 SV=1	HUMAN	71	2.78802	1.49705e-09	1.28978	2.16163	3.59592	7.1207	2.02392e-09	1.63833	4.34632	11.6661
19	93.03	93.28	38.01	29.08	23.21	sp|P35579|MYH9_HUMAN	Myosin-9 OS=Homo sapiens GN=MYH9 PE=1 SV=4	HUMAN	55	1.2692	4.5736e-05	1.11322	1.14012	1.4129	2.3277	2.54891e-13	1.18778	1.9597	2.7648
20	92.26	93.03	37.33	29.82	25.69	tr|B0V2C8|B0V2C8_HUMAN	C4d-A OS=Homo sapiens GN=C4A PE=4 SV=1	HUMAN	54	0.667077	0.000148356	1.21458	0.549226	0.810216	0.491484	1.22736e-13	1.13655	0.432434	0.558597
21	88.38	90.08	87.34	75.95	71.73	sp|P02774|VTDB_HUMAN	Vitamin D-binding protein OS=Homo sapiens GN=GC PE=1 SV=1	HUMAN	104	0.515869	3.80155e-09	1.18142	0.436652	0.609459	0.423715	0.00408642	1.75924	0.240852	0.745414
22	83.97	107.15	69.35	65.82	61.58	tr|E7ER44|E7ER44_HUMAN	Lactoferroxin-C OS=Homo sapiens GN=LTF PE=4 SV=1	HUMAN	91	1.1528	0.0199782	1.12588	1.02391	1.29792	2.50017	5.71842e-10	1.25675	1.98939	3.14208
23	82.85	83.16	33.61	28.58	23.39	tr|E9PE77|E9PE77_HUMAN	Ugl-Y3 OS=Homo sapiens GN=FN1 PE=4 SV=1	HUMAN	47	0.784413	0.00155576	1.15488	0.679214	0.905906	0.559332	0.00026412	1.33888	0.417761	0.748879
24	81.79	81.91	66.55	58.93	50.78	sp|P26038|MOES_HUMAN	Moesin OS=Homo sapiens GN=MSN PE=1 SV=3	HUMAN	51	1.71284	1.8625e-05	1.24392	1.37697	2.13065	1.57054	0.000147736	1.23814	1.26846	1.94456
26	73.53	85.9	22.72	18.89	16.54	sp|P98088|MUC5A_HUMAN	Mucin-5AC (Fragments) OS=Homo sapiens GN=MUC5AC PE=1 SV=3	HUMAN	70	2.04489	1.12818e-05	1.32678	1.54124	2.71312	5.01241	1.40171e-09	1.49019	3.36361	7.46941
28	65.85	65.97	40.96	34.22	31.66	tr|B7ZKJ8|B7ZKJ8_HUMAN	ITIH4 protein OS=Homo sapiens GN=ITIH4 PE=2 SV=1	HUMAN	52	0.469274	2.13412e-12	1.08816	0.431255	0.510644	0.373441	1.11159e-08	1.21625	0.307041	0.454199
29	63.82	64.19	63.64	56.46	49.6	tr|E9PKE3|E9PKE3_HUMAN	Heat shock cognate 71 kDa protein OS=Homo sapiens GN=HSPA8 PE=3 SV=1	HUMAN	48	1.78402	0.00672977	1.4538	1.22715	2.5936	1.60044	0.00557359	1.34162	1.19292	2.14717
31	59.44	59.88	67.67	56.03	47.84	sp|P01008|ANT3_HUMAN	Antithrombin-III OS=Homo sapiens GN=SERPINC1 PE=1 SV=1	HUMAN	42	0.164159	1.18206e-15	1.20479	0.136255	0.197778	0.143394	1.55979e-14	1.25449	0.114304	0.179886
32	59.3	59.81	66.31	55.79	51.5	sp|P08670|VIME_HUMAN	Vimentin OS=Homo sapiens GN=VIM PE=1 SV=4	HUMAN	47	1.01573	0.797371	1.13169	0.897532	1.1495	0.768334	0.00141651	1.16385	0.660163	0.894229
33	57.43	57.43	82.31	82.31	70.75	sp|P68871|HBB_HUMAN	Hemoglobin subunit beta OS=Homo sapiens GN=HBB PE=1 SV=2	HUMAN	49	0.36817	0.0123161	2.09585	0.175666	0.771629	0.637537	0.022243	1.45337	0.438662	0.926575
34	57.27	57.48	52.48	47.73	41.53	sp|Q8TDL5|BPIB1_HUMAN	BPI fold-containing family B member 1 OS=Homo sapiens GN=BPIFB1 PE=2 SV=1	HUMAN	40	3.53468	0.000138133	1.53467	2.30322	5.42458	6.14938	2.17019e-05	1.60884	3.82224	9.89337
35	56.1	57.64	17.39	8.464	5.127	sp|Q15149-8|PLEC_HUMAN	Isoform 8 of Plectin OS=Homo sapiens GN=PLEC	HUMAN	27	1.12697	0.236604	1.2249	0.920051	1.38043	1.03534	0.664015	1.17644	0.880056	1.21801
36	54.76	54.79	53.91	47.05	42.74	sp|P13796|PLSL_HUMAN	Plastin-2 OS=Homo sapiens GN=LCP1 PE=1 SV=6	HUMAN	41	1.18347	0.210818	1.31358	0.900952	1.55459	1.01806	0.894635	1.32306	0.769472	1.34696
37	54.46	54.55	79.84	75.81	66.13	sp|P06753-2|TPM3_HUMAN	Isoform 2 of Tropomyosin alpha-3 chain OS=Homo sapiens GN=TPM3	HUMAN	36	1.23748	0.0837421	1.28253	0.964874	1.5871	1.50121	0.124576	1.72648	0.869519	2.59181
38	54.18	54.49	68.79	63.42	63.42	sp|P25311|ZA2G_HUMAN	Zinc-alpha-2-glycoprotein OS=Homo sapiens GN=AZGP1 PE=1 SV=2	HUMAN	67	0.458232	1.29903e-14	1.11271	0.411816	0.509878	0.860168	0.0311285	1.14559	0.750851	0.9854
40	52.87	52.92	100	100	94.62	sp|P05109|S10A8_HUMAN	Protein S100-A8 OS=Homo sapiens GN=S100A8 PE=1 SV=1	HUMAN	66	1.58587	1.32025e-06	1.13564	1.39645	1.80098	1.88063	0.000156553	1.30849	1.43726	2.46078
41	51.73	54.18	47.65	38.02	32.22	sp|P00747|PLMN_HUMAN	Plasminogen OS=Homo sapiens GN=PLG PE=1 SV=2	HUMAN	34	0.34597	1.21073e-12	1.16592	0.296735	0.403374	0.295586	2.99571e-15	1.14042	0.259191	0.337091
42	50.8	51.27	68.43	57.6	48.85	sp|P06733|ENOA_HUMAN	Alpha-enolase OS=Homo sapiens GN=ENO1 PE=1 SV=2	HUMAN	33	1.51177	0.0338334	1.45703	1.03757	2.20269	2.15989	0.0067195	1.67656	1.28828	3.62119
43	50.38	50.69	54.99	47.08	46.89	sp|P14618|KPYM_HUMAN	Pyruvate kinase isozymes M1/M2 OS=Homo sapiens GN=PKM PE=1 SV=4	HUMAN	34	1.39033	0.0541277	1.39972	0.993289	1.94607	1.29601	0.154606	1.44717	0.895549	1.87555
45	49.41	49.45	57.18	54.31	44.5	sp|P36955|PEDF_HUMAN	Pigment epithelium-derived factor OS=Homo sapiens GN=SERPINF1 PE=1 SV=4	HUMAN	30	1.5081	0.00022635	1.19623	1.26071	1.80403	1.11992	0.34527	1.28237	0.873317	1.43614
46	47.41	47.81	37.36	31.63	28.55	sp|P02452|CO1A1_HUMAN	Collagen alpha-1(I) chain OS=Homo sapiens GN=COL1A1 PE=1 SV=5	HUMAN	36	1.75277	0.0225542	1.5828	1.10739	2.77429	1.29695	0.512711	2.39973	0.540458	3.11233
48	46.43	46.47	59.94	59.94	53.6	sp|P02750|A2GL_HUMAN	Leucine-rich alpha-2-glycoprotein OS=Homo sapiens GN=LRG1 PE=1 SV=2	HUMAN	41	0.564026	2.56513e-08	1.10324	0.511244	0.622258	0.552172	1.82976e-07	1.12937	0.488922	0.623604
49	46.32	64.37	61.95	52.05	43.52	sp|P15311|EZRI_HUMAN	Ezrin OS=Homo sapiens GN=EZR PE=1 SV=4	HUMAN	38	2.15508	1.37797e-07	1.229	1.75353	2.64859	2.56752	2.70484e-08	1.25729	2.0421	3.22812
50	46.06	46.12	71.08	64.71	60.78	tr|E9PK25|E9PK25_HUMAN	Cofilin-1 OS=Homo sapiens GN=CFL1 PE=4 SV=1	HUMAN	35	1.4627	0.158883	1.74461	0.838408	2.55183	1.33188	0.252769	1.69236	0.786998	2.25401
51	46.02	46.02	93.86	93.86	86.84	sp|P06702|S10A9_HUMAN	Protein S100-A9 OS=Homo sapiens GN=S100A9 PE=1 SV=1	HUMAN	123	1.51178	0.00289822	1.28141	1.17978	1.93721	2.18899	0.000394949	1.44506	1.5148	3.16322
52	45.27	45.49	71.21	61.3	57.89	sp|P12429|ANXA3_HUMAN	Annexin A3 OS=Homo sapiens GN=ANXA3 PE=1 SV=3	HUMAN	31	0.895409	0.255009	1.21942	0.734289	1.09188	2.25171	7.7611e-08	1.20389	1.87036	2.71081
53	45.2	45.33	39.51	26.77	22.38	sp|P13671|CO6_HUMAN	Complement component C6 OS=Homo sapiens GN=C6 PE=1 SV=3	HUMAN	26	0.796436	0.00501143	1.16562	0.683271	0.928344	0.67355	7.86497e-06	1.16075	0.580271	0.781824
54	45.15	45.39	83.1	79.58	71.13	sp|P69905|HBA_HUMAN	Hemoglobin subunit alpha OS=Homo sapiens GN=HBA1 PE=1 SV=2	HUMAN	51	0.279806	0.000536854	1.59236	0.175717	0.445553	0.358451	0.000253831	1.38627	0.258572	0.49691
55	43.51	44.51	55.97	52.22	48.95	sp|P01042-2|KNG1_HUMAN	Isoform LMW of Kininogen-1 OS=Homo sapiens GN=KNG1	HUMAN	39	0.243902	0.000815318	1.38299	0.176359	0.337314	0.153043	0.000317741	1.3691	0.111784	0.209531
57	42.68	43.04	34.04	22.22	19.84	sp|P18206|VINC_HUMAN	Vinculin OS=Homo sapiens GN=VCL PE=1 SV=4	HUMAN	21	1.77433	3.95744e-06	1.21295	1.46281	2.15218	1.10361	0.141257	1.14355	0.965072	1.26204
58	41.24	41.24	70.8	65.78	52.8	sp|P07355|ANXA2_HUMAN	Annexin A2 OS=Homo sapiens GN=ANXA2 PE=1 SV=2	HUMAN	25	0.810255	0.00894917	1.16113	0.697815	0.940812	0.968167	0.434701	1.08968	0.888483	1.055
59	39.91	40.09	55.11	50.85	43.47	sp|P02760|AMBP_HUMAN	Protein AMBP OS=Homo sapiens GN=AMBP PE=1 SV=1	HUMAN	32	0.392632	5.55276e-05	1.43177	0.274227	0.56216	0.40305	4.02661e-05	1.40257	0.287366	0.565306
61	38.36	38.47	46.87	38.24	32.49	tr|E7ETH0|E7ETH0_HUMAN	Complement factor I OS=Homo sapiens GN=CFI PE=3 SV=1	HUMAN	35
62	38.11	38.15	53.33	47.47	36.77	sp|P04217|A1BG_HUMAN	Alpha-1B-glycoprotein OS=Homo sapiens GN=A1BG PE=1 SV=4	HUMAN	27	0.208952	0.0387618	4.10857	0.0508575	0.858492	0.260456	0.0319293	3.08177	0.084515	0.802665
63	37.83	38.02	45.36	33.47	26.23	sp|P07900|HS90A_HUMAN	Heat shock protein HSP 90-alpha OS=Homo sapiens GN=HSP90AA1 PE=1 SV=5	HUMAN	23	1.06237	0.515895	1.24937	0.850327	1.32729	1.05284	0.472593	1.18589	0.887802	1.24856
65	37.45	37.47	78.5	62.5	54.5	tr|H9KV70|H9KV70_HUMAN	Neutrophil gelatinase-associated lipocalin OS=Homo sapiens GN=LCN2 PE=3 SV=1	HUMAN	48	2.51946	5.61982e-05	1.44248	1.74662	3.63426	5.8228	5.8959e-09	1.41657	4.1105	8.24839
66	37.16	38.06	42.91	32.98	28.09	sp|Q9P2E9|RRBP1_HUMAN	Ribosome-binding protein 1 OS=Homo sapiens GN=RRBP1 PE=1 SV=4	HUMAN	27	0.733676	0.0850914	1.42915	0.513365	1.04853	1.08382	0.578547	1.34841	0.803777	1.46144
69	36.7	36.87	45.11	36.93	33.13	sp|P10909-2|CLUS_HUMAN	Isoform 2 of Clusterin OS=Homo sapiens GN=CLU	HUMAN	34	0.645132	2.74086e-05	1.17046	0.551177	0.755102	0.524335	3.68729e-05	1.26918	0.413128	0.665477
70	36.61	38.82	26.9	19.64	17.04	sp|Q86VB7|C163A_HUMAN	Scavenger receptor cysteine-rich type 1 protein M130 OS=Homo sapiens GN=CD163 PE=1 SV=2	HUMAN	22	1.30564	0.0443714	1.29588	1.00753	1.69195	0.775119	0.00235516	1.16246	0.666791	0.901046
71	36.5	37.39	49.07	39.79	31.13	sp|P01019|ANGT_HUMAN	Angiotensinogen OS=Homo sapiens GN=AGT PE=1 SV=1	HUMAN	26	0.810429	0.207528	1.42401	0.569118	1.15406	0.610015	0.000917626	1.24985	0.488072	0.762424
72	36.35	36.38	46.38	43.89	35.16	sp|Q8NBJ4|GOLM1_HUMAN	Golgi membrane protein 1 OS=Homo sapiens GN=GOLM1 PE=1 SV=1	HUMAN	22	1.6936	0.00575804	1.42693	1.18688	2.41665	3.04703	2.20227e-06	1.42585	2.13698	4.34462
73	36.09	36.09	66.09	55.36	48.99	sp|P02749|APOH_HUMAN	Beta-2-glycoprotein 1 OS=Homo sapiens GN=APOH PE=1 SV=3	HUMAN	31	0.212378	1.36962e-06	1.40445	0.151217	0.298274	0.62851	0.16231	1.98542	0.316563	1.24785
74	35.91	35.96	89.87	79.3	73.13	sp|P80723|BASP1_HUMAN	Brain acid soluble protein 1 OS=Homo sapiens GN=BASP1 PE=1 SV=2	HUMAN	28	1.44038	0.0651882	1.48082	0.972693	2.13294	4.28646	6.14126e-05	1.63549	2.62091	7.01045
75	35.61	35.86	44.22	37.4	27.58	tr|E7EPA7|E7EPA7_HUMAN	Transketolase OS=Homo sapiens GN=TKT PE=4 SV=1	HUMAN	23	1.05948	0.581916	1.24593	0.850352	1.32004	1.08909	0.361207	1.21401	0.8971	1.32217
76	35.19	35.35	67.76	60.9	53.13	sp|P04406|G3P_HUMAN	Glyceraldehyde-3-phosphate dehydrogenase OS=Homo sapiens GN=GAPDH PE=1 SV=3	HUMAN	24	2.01224	0.00479874	1.54037	1.30634	3.09958	2.23939	0.00538165	1.66164	1.3477	3.72106
77	35.01	35.39	43.09	37.62	31.51	sp|P00734|THRB_HUMAN	Prothrombin OS=Homo sapiens GN=F2 PE=1 SV=2	HUMAN	25	0.567473	4.72219e-06	1.1781	0.481684	0.668543	0.339575	1.99999e-09	1.17384	0.289285	0.398607
79	34.49	34.62	51.38	40.16	31.5	sp|P07237|PDIA1_HUMAN	Protein disulfide-isomerase OS=Homo sapiens GN=P4HB PE=1 SV=3	HUMAN	19	0.987161	0.89807	1.23427	0.799795	1.21842	1.22439	0.178646	1.35676	0.902438	1.6612
80	33.83	33.83	50.47	38.52	31.5	sp|P04040|CATA_HUMAN	Catalase OS=Homo sapiens GN=CAT PE=1 SV=3	HUMAN	21	0.676087	0.0027264	1.26225	0.535622	0.85339	1.09855	0.372028	1.24317	0.883667	1.36569
81	33.36	33.42	35.11	28.94	23.49	sp|P10643|CO7_HUMAN	Complement component C7 OS=Homo sapiens GN=C7 PE=1 SV=2	HUMAN	18	1.05116	0.4979	1.1636	0.903362	1.22313	0.644924	0.00994056	1.37692	0.468382	0.888008
82	32.87	33.18	41.54	33.68	29.4	sp|Q08380|LG3BP_HUMAN	Galectin-3-binding protein OS=Homo sapiens GN=LGALS3BP PE=1 SV=1	HUMAN	25	1.14087	0.176271	1.22358	0.932404	1.39595	0.785161	0.0593247	1.28834	0.609435	1.01156
83	32.45	32.54	46.41	37.57	31.12	tr|E9PGN7|E9PGN7_HUMAN	Plasma protease C1 inhibitor OS=Homo sapiens GN=SERPING1 PE=3 SV=1	HUMAN	20	0.60345	0.00702902	1.40001	0.431031	0.844838	0.329039	1.89167e-07	1.23836	0.265705	0.407469
84	31.32	31.52	71.65	66.28	59.39	sp|P00915|CAH1_HUMAN	Carbonic anhydrase 1 OS=Homo sapiens GN=CA1 PE=1 SV=2	HUMAN	21	0.443574	0.0034953	1.58177	0.280429	0.701632	0.685811	0.138469	1.69641	0.404272	1.16342
85	30.99	31.12	37.22	32.33	31.02	sp|P05362|ICAM1_HUMAN	Intercellular adhesion molecule 1 OS=Homo sapiens GN=ICAM1 PE=1 SV=2	HUMAN	17	1.1131	0.409212	1.32316	0.841244	1.47282	0.841106	0.0499767	1.18887	0.707484	0.999966
86	30.73	30.77	28.99	21.07	18.26	sp|P05164|PERM_HUMAN	Myeloperoxidase OS=Homo sapiens GN=MPO PE=1 SV=1	HUMAN	25	0.5907	0.000994291	1.29816	0.45503	0.766821	0.79877	0.0390887	1.23519	0.646678	0.986634
87	30.27	30.53	76.92	76.92	76.92	sp|P11684|UTER_HUMAN	Uteroglobin OS=Homo sapiens GN=SCGB1A1 PE=1 SV=1	HUMAN	46	6.22315	0.00522103	2.84607	2.18658	17.7115	3.80652	0.0106408	2.44706	1.55555	9.31479
89	29.87	34.33	40.55	30.46	27.69	tr|Q6UYC3|Q6UYC3_HUMAN	Lamin A/C OS=Homo sapiens GN=LMNA PE=2 SV=1	HUMAN	18	1.00224	0.975926	1.16804	0.858051	1.17066	0.593818	2.91092e-05	1.20709	0.491942	0.716791
90	29.61	29.83	54.08	47.55	46.2	tr|J3KPS3|J3KPS3_HUMAN	Fructose-bisphosphate aldolase OS=Homo sapiens GN=ALDOA PE=3 SV=1	HUMAN	22	1.30251	0.158122	1.46833	0.88707	1.91251	1.27618	0.0863776	1.32981	0.959672	1.69708
91	29.13	32.19	47.11	38.44	32.08	sp|P04083|ANXA1_HUMAN	Annexin A1 OS=Homo sapiens GN=ANXA1 PE=1 SV=2	HUMAN	20	1.33809	0.000389543	1.13618	1.17771	1.52031	2.31393	1.44405e-05	1.2855	1.80002	2.97456
92	28.92	29.84	15.39	9.681	7.123	sp|Q9Y490|TLN1_HUMAN	Talin-1 OS=Homo sapiens GN=TLN1 PE=1 SV=3	HUMAN	17	0.945303	0.798113	1.58466	0.596535	1.49798	0.957102	0.676309	1.24538	0.768523	1.19195
93	28.66	29.45	21.54	11.99	9.308	sp|P01031|CO5_HUMAN	Complement C5 OS=Homo sapiens GN=C5 PE=1 SV=4	HUMAN	16	0.660809	0.000110306	1.17827	0.560829	0.778614	0.478142	6.61959e-06	1.2465	0.383586	0.596006
94	28.3	28.45	31.12	27.58	26.73	sp|P14780|MMP9_HUMAN	Matrix metalloproteinase-9 OS=Homo sapiens GN=MMP9 PE=1 SV=3	HUMAN	17	1.84281	0.00647287	1.49931	1.22911	2.76295	1.48038	0.03207	1.42279	1.04048	2.10627
95	28.03	28.12	97.73	93.18	81.82	sp|P62328|TYB4_HUMAN	Thymosin beta-4 OS=Homo sapiens GN=TMSB4X PE=1 SV=2	HUMAN	30	2.65357	0.00915322	1.67394	1.58523	4.44191	3.17769	0.0510666	3.20925	0.990165	10.198
96	27.86	28.16	61.19	59.09	52.8	sp|P60174|TPIS_HUMAN	Triosephosphate isomerase OS=Homo sapiens GN=TPI1 PE=1 SV=3	HUMAN	18	1.63137	0.000850798	1.26158	1.29312	2.0581	2.68797	2.47117e-06	1.26013	2.1331	3.38718
97	27.72	27.9	26.33	21.49	17.05	sp|P02461|CO3A1_HUMAN	Collagen alpha-1(III) chain OS=Homo sapiens GN=COL3A1 PE=1 SV=4	HUMAN	22	1.92351	0.00567328	1.3993	1.37463	2.69158	1.38981	0.00729824	1.19892	1.15923	1.66627
98	27.52	27.89	12.17	8.88	6.428	sp|Q8WXI7|MUC16_HUMAN	Mucin-16 OS=Homo sapiens GN=MUC16 PE=1 SV=2	HUMAN	24	1.4271	0.0495504	1.42601	1.00076	2.03505	2.11481	0.000536783	1.46171	1.4468	3.09124
99	27.48	27.53	81.08	75.68	60.14	sp|P61626|LYSC_HUMAN	Lysozyme C OS=Homo sapiens GN=LYZ PE=1 SV=1	HUMAN	46	4.28626	6.91084e-06	1.38613	3.09224	5.94134	14.2674	1.30698e-07	1.42707	9.99774	20.3606
100	27.3	41.48	56.27	45.87	35.47	sp|P11021|GRP78_HUMAN	78 kDa glucose-regulated protein OS=Homo sapiens GN=HSPA5 PE=1 SV=2	HUMAN	26	1.32727	0.0556979	1.33757	0.992295	1.77532	1.51346	0.00343129	1.29358	1.16998	1.95778
101	26.85	28.33	67.66	58.71	49.75	sp|P52566|GDIR2_HUMAN	Rho GDP-dissociation inhibitor 2 OS=Homo sapiens GN=ARHGDIB PE=1 SV=3	HUMAN	19	1.52355	0.00217281	1.22278	1.24597	1.86297	2.92898	0.0105583	2.05066	1.42831	6.00634
102	26.58	26.86	84.29	69.29	69.29	sp|P07737|PROF1_HUMAN	Profilin-1 OS=Homo sapiens GN=PFN1 PE=1 SV=2	HUMAN	20	1.93047	0.0172193	1.66649	1.15841	3.2171	1.53809	0.0430827	1.51266	1.01682	2.32661
103	26.57	26.72	37.96	34.92	26.9	sp|Q02818|NUCB1_HUMAN	Nucleobindin-1 OS=Homo sapiens GN=NUCB1 PE=1 SV=4	HUMAN	13	1.06221	0.545839	1.23754	0.858321	1.31452	1.33785	0.0965545	1.42277	0.940318	1.90346
104	26.41	26.43	74.87	72.73	72.73	tr|H0Y7A7|H0Y7A7_HUMAN	Calmodulin (Fragment) OS=Homo sapiens GN=CALM2 PE=4 SV=1	HUMAN	26	1.20071	0.319634	1.49759	0.801763	1.79818	1.12966	0.339476	1.32486	0.852667	1.49664
105	26.06	26.06	73.37	61.31	50.25	tr|Q5VY30|Q5VY30_HUMAN	Plasma retinol-binding protein(1-182) OS=Homo sapiens GN=RBP4 PE=2 SV=1	HUMAN	17	0.370415	0.00314038	1.70452	0.217313	0.631381	0.320828	0.000752762	1.60572	0.199804	0.51516
106	26.03	28.14	49.16	45.81	45.53	sp|O14745|NHRF1_HUMAN	Na(+)/H(+) exchange regulatory cofactor NHE-RF1 OS=Homo sapiens GN=SLC9A3R1 PE=1 SV=4	HUMAN	16	1.36937	0.00380785	1.20189	1.13935	1.64583	1.70817	0.10785	1.97061	0.866821	3.36614
107	26	26.25	16.74	11.14	8.866	tr|J3QSU6|J3QSU6_HUMAN	Tenascin OS=Homo sapiens GN=TNC PE=4 SV=1	HUMAN	13	1.37152	0.0276953	1.31859	1.04014	1.80848	1.16397	0.195623	1.26913	0.917136	1.47724
109	25.59	25.95	37.21	28.98	19.68	sp|P02748|CO9_HUMAN	Complement component C9 OS=Homo sapiens GN=C9 PE=1 SV=2	HUMAN	19	0.908644	0.267877	1.19682	0.759213	1.08749	0.745122	0.0118803	1.24166	0.600103	0.925186
110	25	27.17	38.15	34.6	31.61	sp|P02765|FETUA_HUMAN	Alpha-2-HS-glycoprotein OS=Homo sapiens GN=AHSG PE=1 SV=1	HUMAN	20	0.213504	2.29265e-07	1.24861	0.170993	0.266583	0.207263	9.47741e-05	1.65835	0.124981	0.343715
111	24.93	25.03	40.53	33.5	30.58	sp|P07339|CATD_HUMAN	Cathepsin D OS=Homo sapiens GN=CTSD PE=1 SV=1	HUMAN	16	1.28954	0.0705555	1.32309	0.974641	1.70619	1.10137	0.408587	1.28326	0.858262	1.41334
112	24.88	24.94	52.66	46.75	44.67	sp|P51884|LUM_HUMAN	Lumican OS=Homo sapiens GN=LUM PE=1 SV=2	HUMAN	26	1.1163	0.0552749	1.11973	0.996941	1.24996	0.442524	0.00609235	1.678	0.263721	0.742554
113	24.61	24.68	58.92	47.77	39.49	sp|P10451|OSTP_HUMAN	Osteopontin OS=Homo sapiens GN=SPP1 PE=1 SV=1	HUMAN	20	2.23825	0.00427017	1.58191	1.4149	3.54072	1.00382	0.983386	1.51957	0.660599	1.52538
114	24.54	24.66	77.78	70	70	sp|P06703|S10A6_HUMAN	Protein S100-A6 OS=Homo sapiens GN=S100A6 PE=1 SV=1	HUMAN	17	2.18833	0.015034	1.78339	1.22707	3.90264	0.821699	0.464624	1.82313	0.450707	1.49807
115	24.12	24.16	71.43	54.62	53.78	sp|P61769|B2MG_HUMAN	Beta-2-microglobulin OS=Homo sapiens GN=B2M PE=1 SV=1	HUMAN	23	1.01322	0.887323	1.31168	0.772465	1.32902	1.36412	0.0301598	1.28932	1.05801	1.75879
116	24.09	24.13	32.57	30.67	29.14	sp|P04196|HRG_HUMAN	Histidine-rich glycoprotein OS=Homo sapiens GN=HRG PE=1 SV=1	HUMAN	17	0.343161	4.51764e-07	1.20854	0.283946	0.414725	0.165025	3.56794e-05	1.71774	0.096071	0.283471
117	24	24.48	66.48	58.52	53.98	sp|Q9BW30|TPPP3_HUMAN	Tubulin polymerization-promoting protein family member 3 OS=Homo sapiens GN=TPPP3 PE=1 SV=1	HUMAN	15	0.635414	0.000217589	1.21347	0.523635	0.771054	0.581507	0.0101863	1.47696	0.393718	0.858864
118	23.89	23.96	31.16	26.88	21.58	sp|P07357|CO8A_HUMAN	Complement component C8 alpha chain OS=Homo sapiens GN=C8A PE=1 SV=2	HUMAN	13	0.794324	0.00022586	1.09892	0.722819	0.872901	0.400818	2.76912e-06	1.25867	0.318444	0.504499
119	23.83	23.83	21.57	18.3	17.32	tr|H3BMA1|H3BMA1_HUMAN	Mesothelin, cleaved form OS=Homo sapiens GN=MSLN PE=4 SV=1	HUMAN	14	1.62973	0.0118498	1.42104	1.14686	2.31592	0.775595	0.0159374	1.21427	0.638733	0.941782
120	23.64	23.93	28.98	22.39	17.12	sp|P19827|ITIH1_HUMAN	Inter-alpha-trypsin inhibitor heavy chain H1 OS=Homo sapiens GN=ITIH1 PE=1 SV=3	HUMAN	14	0.57702	9.7932e-07	1.13257	0.509477	0.653516	0.460318	3.32109e-05	1.28969	0.356921	0.593669
121	23.1	23.39	31.52	23.8	19.02	sp|Q32MZ4-3|LRRF1_HUMAN	Isoform 3 of Leucine-rich repeat flightless-interacting protein 1 OS=Homo sapiens GN=LRRFIP1	HUMAN	13	0.79538	0.0518418	1.26	0.631253	1.00218	1.07277	0.512992	1.25698	0.853454	1.34845
122	22.96	23.25	31.6	24.08	22.54	tr|F5H5D3|F5H5D3_HUMAN	Tubulin alpha-1C chain OS=Homo sapiens GN=TUBA1C PE=3 SV=1	HUMAN	14	0.783432	0.350702	1.90004	0.412324	1.48855	0.627159	0.0120843	1.3461	0.465907	0.844221
123	22.93	23.18	15.11	10.3	7.692	sp|P22897|MRC1_HUMAN	Macrophage mannose receptor 1 OS=Homo sapiens GN=MRC1 PE=1 SV=1	HUMAN	13	0.867625	0.0798871	1.17522	0.738268	1.01965	0.494021	8.96121e-06	1.24202	0.397758	0.613582
124	22.88	23.14	72.79	72.79	72.79	sp|P02766|TTHY_HUMAN	Transthyretin OS=Homo sapiens GN=TTR PE=1 SV=1	HUMAN	17	0.140427	0.00432452	1.74595	0.0804302	0.245178	0.292581	0.0308187	2.58704	0.113095	0.756918
125	22.86	22.89	44.33	37.73	32.19	sp|P30740|ILEU_HUMAN	Leukocyte elastase inhibitor OS=Homo sapiens GN=SERPINB1 PE=1 SV=1	HUMAN	14	1.55054	0.000247804	1.19293	1.29977	1.84969	1.22088	0.0631664	1.23712	0.986874	1.51038
126	22.79	22.81	35.77	29.5	26.99	sp|P04004|VTNC_HUMAN	Vitronectin OS=Homo sapiens GN=VTN PE=1 SV=1	HUMAN	16	0.389463	0.000125002	1.39541	0.279102	0.543462	0.302758	2.87681e-05	1.38418	0.218727	0.419073
127	22.74	23.98	25.44	21.55	18.34	sp|O00391|QSOX1_HUMAN	Sulfhydryl oxidase 1 OS=Homo sapiens GN=QSOX1 PE=1 SV=3	HUMAN	15	2.25045	0.000177721	1.33028	1.69171	2.99374	1.17885	0.0317769	1.15733	1.01859	1.36431
128	22.56	22.56	48.44	42.19	42.19	sp|Q96KK5|H2A1H_HUMAN	Histone H2A type 1-H OS=Homo sapiens GN=HIST1H2AH PE=1 SV=3	HUMAN	21	0.704686	0.667985	10.4914	0.0671682	7.39312	1.0442	0.97704	81.9174	0.012747	85.5385
129	22.55	22.55	70.2	54.69	46.12	sp|P63104|1433Z_HUMAN	14-3-3 protein zeta/delta OS=Homo sapiens GN=YWHAZ PE=1 SV=1	HUMAN	19	0.923055	0.784605	2.34595	0.393468	2.16544	1.09268	0.522425	1.47784	0.739379	1.61481
130	22.13	23.04	58.85	50	40.27	sp|P16401|H15_HUMAN	Histone H1.5 OS=Homo sapiens GN=HIST1H1B PE=1 SV=3	HUMAN	15	1.12114	0.752917	3.91351	0.286479	4.38759	2.73391	0.0304782	2.16694	1.26165	5.9242
131	22.01	22.01	50	48.8	48.8	sp|P29966|MARCS_HUMAN	Myristoylated alanine-rich C-kinase substrate OS=Homo sapiens GN=MARCKS PE=1 SV=4	HUMAN	12	1.38919	0.0673501	1.4376	0.966322	1.9971	2.81592	0.000900258	1.46046	1.92811	4.11255
132	21.76	21.79	40.29	38.13	25.9	sp|P27797|CALR_HUMAN	Calreticulin OS=Homo sapiens GN=CALR PE=1 SV=1	HUMAN	13	1.13008	0.407964	1.36731	0.826498	1.54516	1.07382	0.532355	1.27526	0.842036	1.3694
133	21.7	24.67	47.19	41.99	33.33	sp|P68104|EF1A1_HUMAN	Elongation factor 1-alpha 1 OS=Homo sapiens GN=EEF1A1 PE=1 SV=1	HUMAN	16	1.27333	0.306706	1.67925	0.758274	2.13824	0.923	0.686437	1.56863	0.588413	1.44784
134	21.49	23.56	28.02	19.04	13.48	tr|Q5T985|Q5T985_HUMAN	Inter-alpha (Globulin) inhibitor H2 OS=Homo sapiens GN=ITIH2 PE=2 SV=1	HUMAN	12	0.627248	0.00195996	1.2773	0.491072	0.801186	0.384825	6.63083e-06	1.26204	0.304922	0.485665
135	21.47	21.77	25.59	20.43	15.48	tr|B7TY16|B7TY16_HUMAN	Actinin alpha 1 isoform 3 OS=Homo sapiens GN=ACTN1 PE=2 SV=1	HUMAN	12	1.02458	0.825375	1.29406	0.791756	1.32586	1.14719	0.352115	1.39536	0.822143	1.60074
137	21.02	22.61	37.26	36.26	25.49	sp|Q9UGM3|DMBT1_HUMAN	Deleted in malignant brain tumors 1 protein OS=Homo sapiens GN=DMBT1 PE=1 SV=2	HUMAN	24	1.99285	0.00671191	1.55021	1.28554	3.08935	8.42263	0.000461453	2.37291	3.54949	19.9862
138	20.97	20.97	65.24	63.1	53.48	sp|P30086|PEBP1_HUMAN	Phosphatidylethanolamine-binding protein 1 OS=Homo sapiens GN=PEBP1 PE=1 SV=3	HUMAN	12	0.999611	0.998395	1.61589	0.618615	1.61526	0.737201	0.105943	1.48875	0.49518	1.09751
139	20.94	21.19	48.68	32.13	26.38	sp|P00558|PGK1_HUMAN	Phosphoglycerate kinase 1 OS=Homo sapiens GN=PGK1 PE=1 SV=3	HUMAN	12	1.72633	0.000405886	1.24252	1.38938	2.145	1.97281	0.00180336	1.40796	1.40118	2.77765
140	20.93	20.96	60.27	49.32	43.15	sp|P01034|CYTC_HUMAN	Cystatin-C OS=Homo sapiens GN=CST3 PE=1 SV=1	HUMAN	16	0.942087	0.613013	1.30552	0.721621	1.22991	1.1576	0.359722	1.42358	0.813163	1.64794
141	20.79	20.87	59.06	46.85	42.52	sp|P18669|PGAM1_HUMAN	Phosphoglycerate mutase 1 OS=Homo sapiens GN=PGAM1 PE=1 SV=2	HUMAN	11	1.41673	0.0213811	1.32762	1.06712	1.88087	0.991385	0.934019	1.25846	0.787776	1.24762
142	20.62	20.63	93.46	93.46	82.35	sp|P00441|SODC_HUMAN	Superoxide dismutase [Cu-Zn] OS=Homo sapiens GN=SOD1 PE=1 SV=?		15	0.948629	0.747869	1.44119	0.658226	1.36716	1.04561	0.687218	1.27929	0.817339	1.33765
143	20.57	20.59	36.87	32.74	31.27	sp|P07858|CATB_HUMAN	Cathepsin B OS=Homo sapiens GN=CTSB PE=1 SV=3	HUMAN	14	1.05101	0.870715	2.00763	0.523506	2.11004	1.31746	0.209302	1.60259	0.82208	2.11134
144	20.51	20.98	26.2	15.63	12.82	sp|P19338|NUCL_HUMAN	Nucleolin OS=Homo sapiens GN=NCL PE=1 SV=3	HUMAN	11	0.888539	0.367443	1.31882	0.673739	1.17182	0.977741	0.889926	1.4188	0.689134	1.38721
145	19.98	22.18	45	35.31	32.19	sp|P08758|ANXA5_HUMAN	Annexin A5 OS=Homo sapiens GN=ANXA5 PE=1 SV=2	HUMAN	13	0.447017	0.000111398	1.2085	0.369895	0.54022	1.84643	0.000429515	1.21093	1.5248	2.2359
146	19.87	19.94	55.56	48.61	45.83	sp|P23284|PPIB_HUMAN	Peptidyl-prolyl cis-trans isomerase B OS=Homo sapiens GN=PPIB PE=1 SV=2	HUMAN	12	1.59973	0.00762704	1.3233	1.2089	2.11692	4.36062	9.73239e-06	1.23416	3.53327	5.3817
147	19.75	20.33	44.34	31.08	22.41	sp|P05543|THBG_HUMAN	Thyroxine-binding globulin OS=Homo sapiens GN=SERPINA7 PE=1 SV=2	HUMAN	15	0.692634	0.0257249	1.36536	0.50729	0.945695	0.746202	0.011856	1.23448	0.604469	0.921168
148	19.73	19.96	41.89	33.68	21.68	sp|Q01518|CAP1_HUMAN	Adenylyl cyclase-associated protein 1 OS=Homo sapiens GN=CAP1 PE=1 SV=5	HUMAN	11	1.58887	0.0318665	1.51526	1.04858	2.40755	2.11433	0.00199303	1.51433	1.39621	3.2018
150	19.08	19.1	65.91	56.06	50	sp|P03973|SLPI_HUMAN	Antileukoproteinase OS=Homo sapiens GN=SLPI PE=1 SV=2	HUMAN	16	4.62122	2.75408e-05	1.4567	3.1724	6.73172	5.48797	0.0141328	3.45706	1.58747	18.9722
151	19	19	60.85	52.91	47.62	sp|Q13938|CAYP1_HUMAN	Calcyphosin OS=Homo sapiens GN=CAPS PE=1 SV=1	HUMAN	14	0.909001	0.200847	1.17329	0.774745	1.06652	0.631095	0.00185836	1.2517	0.504192	0.789939
152	18.93	19.24	33.33	21.47	15.47	tr|G5E9D3|G5E9D3_HUMAN	Calpastatin OS=Homo sapiens GN=CAST PE=4 SV=1	HUMAN	11	1.05712	0.690138	1.35192	0.78194	1.42914	2.11717	0.010413	1.70114	1.24456	3.6016
153	18.93	19.02	21.93	19.58	16.45	tr|H0YB57|H0YB57_HUMAN	Pulmonary surfactant-associated protein B (Fragment) OS=Homo sapiens GN=SFTPB PE=4 SV=1	HUMAN	12	2.43184	0.0015898	1.29178	1.88255	3.14141	0.504623	0.0229547	1.65631	0.304668	0.835811
154	18.83	20.7	29.5	22.99	19.31	sp|P31146|COR1A_HUMAN	Coronin-1A OS=Homo sapiens GN=CORO1A PE=1 SV=4	HUMAN	10	1.20223	0.43585	1.69402	0.709691	2.03661	2.42942	0.000549881	1.42006	1.71078	3.44993
156	18.72	18.79	60.14	44.59	44.59	tr|J3KMY5|J3KMY5_HUMAN	Epididymal secretory protein E1 OS=Homo sapiens GN=NPC2 PE=4 SV=1	HUMAN	14	1.14024	0.580771	1.67902	0.679109	1.91449	1.09068	0.7559	1.84518	0.591094	2.0125
157	18.69	18.69	51.76	41.21	41.21	sp|Q06830|PRDX1_HUMAN	Peroxiredoxin-1 OS=Homo sapiens GN=PRDX1 PE=1 SV=1	HUMAN	12	1.04041	0.795931	1.41721	0.734125	1.47447	0.655174	0.0243139	1.41848	0.461885	0.92935
158	18.5	18.5	57.92	55.83	50	sp|P51858|HDGF_HUMAN	Hepatoma-derived growth factor OS=Homo sapiens GN=HDGF PE=1 SV=1	HUMAN	11	0.827441	0.400483	1.63546	0.505939	1.35324	1.26826	0.142981	1.4013	0.905062	1.77721
159	18.26	18.28	32.1	27.84	23.15	sp|Q96NY7|CLIC6_HUMAN	Chloride intracellular channel protein 6 OS=Homo sapiens GN=CLIC6 PE=2 SV=3	HUMAN	12	1.6978	0.0186201	1.46767	1.1568	2.4918	4.08095	0.0105248	2.36449	1.72593	9.64937
161	18	18	37.92	35.78	33.94	tr|B4DU58|B4DU58_HUMAN	Macrophage-capping protein OS=Homo sapiens GN=CAPG PE=2 SV=1	HUMAN	11	1.65768	0.0539829	1.67509	0.989605	2.77676	1.51076	0.0556885	1.52917	0.98796	2.31021
162	17.81	17.85	19.47	17.13	13.91	tr|G8JLA8|G8JLA8_HUMAN	Transforming growth factor-beta-induced protein ig-h3 OS=Homo sapiens GN=TGFBI PE=4 SV=1	HUMAN	9	1.68835	0.00377508	1.35791	1.24335	2.29262	1.1535	0.247709	1.29865	0.888235	1.49799
163	17.73	19.13	50.45	38.58	29.08	sp|P37837|TALDO_HUMAN	Transaldolase OS=Homo sapiens GN=TALDO1 PE=1 SV=2	HUMAN	10	1.05364	0.51981	1.18734	0.887401	1.25103	1.36358	0.0537209	1.37158	0.994165	1.87026
164	17.69	19.68	60.78	47.55	45.1	sp|P52565|GDIR1_HUMAN	Rho GDP-dissociation inhibitor 1 OS=Homo sapiens GN=ARHGDIA PE=1 SV=3	HUMAN	18	1.37186	0.254662	1.93581	0.708673	2.65567	1.0453	0.904223	2.61095	0.40035	2.72922
165	17.63	17.63	61.48	40.98	40.98	sp|P0DJI8|SAA1_HUMAN	Serum amyloid A-1 protein OS=Homo sapiens GN=SAA1 PE=1 SV=1	HUMAN	15	0.31395					0.391752
166	17.49	17.61	58.41	42.77	40.12	sp|P33241|LSP1_HUMAN	Lymphocyte-specific protein 1 OS=Homo sapiens GN=LSP1 PE=1 SV=1	HUMAN	13	1.05457	0.703921	1.36484	0.772672	1.43932	1.67788	0.0373938	1.61424	1.03942	2.70849
167	17.47	17.55	43.95	36.29	33.87	sp|Q8IWL1|SFPA2_HUMAN	Pulmonary surfactant-associated protein A2 OS=Homo sapiens GN=SFTPA2 PE=1 SV=1	HUMAN	20	0.426114	0.00034212	1.23172	0.34595	0.524855	0.868243	0.529241	1.7683	0.491005	1.53531
168	17.47	17.47	54.37	50.49	49.51	sp|P62805|H4_HUMAN	Histone H4 OS=Homo sapiens GN=HIST1H4A PE=1 SV=2	HUMAN	16	0.502341	0.0398687	1.89018	0.265763	0.949517	0.784868	0.27634	1.7056	0.460171	1.33867
170	17.14	19.24	59.79	54.5	51.32	sp|Q99497|PARK7_HUMAN	Protein DJ-1 OS=Homo sapiens GN=PARK7 PE=1 SV=2	HUMAN	15	1.54461	0.128719	1.8493	0.835241	2.85644	1.54869	0.0759073	1.65481	0.935872	2.56279
171	17.13	17.18	57.94	52.38	38.1	sp|P62807|H2B1C_HUMAN	Histone H2B type 1-C/E/F/G/I OS=Homo sapiens GN=HIST1H2BC PE=1 SV=4	HUMAN	13	0.635335	0.00650804	1.33834	0.474719	0.850295	1.32023	0.182064	1.54427	0.854922	2.03879
172	16.98	19.39	63.41	48.78	45.12	sp|P62937|PPIA_HUMAN	Peptidyl-prolyl cis-trans isomerase A OS=Homo sapiens GN=PPIA PE=1 SV=?		12	1.96094	0.00652334	1.53084	1.28096	3.00188	2.93192	0.00105932	1.6431	1.78439	4.81743
173	16.24	16.26	70.18	55.26	55.26	sp|P08118|MSMB_HUMAN	Beta-microseminoprotein OS=Homo sapiens GN=MSMB PE=1 SV=1	HUMAN	18	8.36485	0.000237335	2.26663	3.69044	18.96	14.969	6.43931e-05	2.40236	6.23096	35.9611
176	15.73	16.26	21.8	14.16	8.652	sp|Q06033|ITIH3_HUMAN	Inter-alpha-trypsin inhibitor heavy chain H3 OS=Homo sapiens GN=ITIH3 PE=1 SV=2	HUMAN	13	0.972085	0.767347	1.2508	0.77717	1.21588	0.497871	0.00293678	1.42473	0.34945	0.70933
177	15.63	15.73	59.46	48.65	48.65	sp|P07108-5|ACBP_HUMAN	Isoform 5 of Acyl-CoA-binding protein OS=Homo sapiens GN=DBI	HUMAN	11	1.83528	7.76137e-06	1.14838	1.59814	2.10759	2.04286	0.000169303	1.28348	1.59166	2.62197
178	15.61	15.66	33.64	30.37	30.37	sp|P30044|PRDX5_HUMAN	Peroxiredoxin-5, mitochondrial OS=Homo sapiens GN=PRDX5 PE=1 SV=4	HUMAN	10	1.21512	0.571672	2.66286	0.456323	3.2357	0.688793	0.0245428	1.32587	0.519504	0.913246
179	15.53	16.51	26.34	18.81	17.23	sp|P30101|PDIA3_HUMAN	Protein disulfide-isomerase A3 OS=Homo sapiens GN=PDIA3 PE=1 SV=4	HUMAN	10	1.40213	0.0011078	1.17018	1.19822	1.64075	1.33271	0.1307	1.4819	0.899323	1.97495
180	15.5	51.58	60.37	50.08	35.57	sp|P08107|HSP71_HUMAN	Heat shock 70 kDa protein 1A/1B OS=Homo sapiens GN=HSPA1A PE=1 SV=5	HUMAN	38	1.40439	0.0949178	1.5161	0.926319	2.1292	1.39578	0.124852	1.57213	0.887825	2.19434
181	15.41	15.53	30.12	23.7	21.48	sp|P08185|CBG_HUMAN	Corticosteroid-binding globulin OS=Homo sapiens GN=SERPINA6 PE=1 SV=1	HUMAN	11	0.56562	0.0281259	1.61428	0.350385	0.913068	0.505569	0.00812396	1.51137	0.33451	0.764101
182	15.14	18.46	42.96	41.48	29.26	sp|P36980|FHR2_HUMAN	Complement factor H-related protein 2 OS=Homo sapiens GN=CFHR2 PE=1 SV=1	HUMAN	10	0.44725	0.00272359	1.45703	0.30696	0.651657	0.300337	0.00145029	1.62987	0.18427	0.489512
183	15.03	15.08	69.8	55.7	30.2	sp|P16949|STMN1_HUMAN	Stathmin OS=Homo sapiens GN=STMN1 PE=1 SV=3	HUMAN	8	1.20089	0.0309391	1.17648	1.02075	1.41283	1.13129	0.119289	1.17508	0.962735	1.32935
184	14.96	15.2	33.57	20.56	12.3	sp|P06744-2|G6PI_HUMAN	Isoform 2 of Glucose-6-phosphate isomerase OS=Homo sapiens GN=GPI	HUMAN	9	1.63924	0.026067	1.51536	1.08175	2.48403	1.1766	0.225764	1.33584	0.88079	1.57175
185	14.93	15.04	19.43	13.69	13.69	sp|P50895|BCAM_HUMAN	Basal cell adhesion molecule OS=Homo sapiens GN=BCAM PE=1 SV=2	HUMAN	9	0.51711	0.00657495	1.48661	0.347845	0.768741	0.467059	0.0200879	1.81018	0.258018	0.845463
186	14.89	14.96	51.9	50	50	sp|P09211|GSTP1_HUMAN	Glutathione S-transferase P OS=Homo sapiens GN=GSTP1 PE=1 SV=2	HUMAN	8	1.09118	0.55833	1.46204	0.74634	1.59534	0.545757	0.000741175	1.19793	0.455583	0.653779
187	14.81	18.18	46.67	37.65	31.76	sp|P62258|1433E_HUMAN	14-3-3 protein epsilon OS=Homo sapiens GN=YWHAE PE=1 SV=1	HUMAN	14	0.917977	0.823021	2.54356	0.360903	2.33493	0.96232	0.706922	1.28145	0.750963	1.23316
188	14.66	14.66	47.32	33.12	30.6	sp|P02649|APOE_HUMAN	Apolipoprotein E OS=Homo sapiens GN=APOE PE=1 SV=1	HUMAN	11	0.438634	0.000368766	1.35626	0.323415	0.5949	0.541486	0.00145095	1.33147	0.406683	0.720973
189	14.54	14.54	67.54	67.54	67.54	sp|O75368|SH3L1_HUMAN	SH3 domain-binding glutamic acid-rich-like protein OS=Homo sapiens GN=SH3BGRL PE=1 SV=1	HUMAN	10	1.47526	0.000286648	1.14795	1.28512	1.69353	1.7591	0.00331392	1.35847	1.29491	2.38968
191	14.48	14.6	27.53	21.82	21.82	sp|Q01459|DIAC_HUMAN	Di-N-acetylchitobiase OS=Homo sapiens GN=CTBS PE=1 SV=1	HUMAN	8	0.813452	0.0664565	1.25214	0.649651	1.01855	1.28479	0.00915928	1.18087	1.08801	1.51717
192	14.42	16.12	34.87	24.36	17.44	sp|P29508|SPB3_HUMAN	Serpin B3 OS=Homo sapiens GN=SERPINB3 PE=1 SV=2	HUMAN	9	2.00313	0.0156952	1.66467	1.20332	3.33456	0.953905	0.682503	1.30842	0.729054	1.2481
193	14.28	14.32	25.64	20.55	18.01	sp|Q13228|SBP1_HUMAN	Selenium-binding protein 1 OS=Homo sapiens GN=SELENBP1 PE=1 SV=2	HUMAN	7	0.766993	0.00232305	1.14422	0.670321	0.877608	0.517055	7.68753e-06	1.14309	0.452332	0.591038
194	14.27	14.39	28.18	21.92	19.57	sp|P04745|AMY1_HUMAN	Alpha-amylase 1 OS=Homo sapiens GN=AMY1A PE=1 SV=2	HUMAN	12	1.00469	0.94692	1.17015	0.858602	1.17564	1.0506	0.761609	1.43702	0.731096	1.50972
196	14.07	14.11	26.5	18.93	18.93	sp|Q15113|PCOC1_HUMAN	Procollagen C-endopeptidase enhancer 1 OS=Homo sapiens GN=PCOLCE PE=1 SV=2	HUMAN	8	1.50602	0.106532	1.6956	0.888193	2.55359	0.848926	0.398715	1.55461	0.546072	1.31974
197	14	14.08	13.95	9.754	8.204	tr|H3BU97|H3BU97_HUMAN	Apolipoprotein B receptor OS=Homo sapiens GN=APOBR PE=4 SV=1	HUMAN	7	0.718085	0.131474	1.62571	0.441706	1.1674	1.07138	0.650952	1.47997	0.723917	1.58561
198	13.79	14.14	23.22	20.16	15.89	sp|P08697|A2AP_HUMAN	Alpha-2-antiplasmin OS=Homo sapiens GN=SERPINF2 PE=1 SV=3	HUMAN	11	0.37728	0.0019471	1.52607	0.247224	0.575754	0.454302	0.00174356	1.39626	0.325371	0.634324
199	13.76	13.79	69.85	56.62	36.76	sp|P68431|H31_HUMAN	Histone H3.1 OS=Homo sapiens GN=HIST1H3A PE=1 SV=2	HUMAN	10	0.704219	0.292137	2.15099	0.327394	1.51477	1.28483	0.459915	2.23727	0.574284	2.87451
200	13.74	13.76	94.56	87.99	61.73	tr|F5H7K6|F5H7K6_HUMAN	Polyubiquitin-C OS=Homo sapiens GN=UBC PE=4 SV=1	HUMAN	13	1.6465	0.0618733	1.70099	0.967965	2.80068	0.977133	0.877063	1.40633	0.694811	1.37417
201	13.37	13.76	46.43	46.43	38.84	tr|F8W7I2|F8W7I2_HUMAN	Prostaglandin-H2 D-isomerase OS=Homo sapiens GN=PTGDS PE=3 SV=1	HUMAN	9	0.662988	0.000947352	1.1642	0.569478	0.771852	0.495005	7.21206e-05	1.16322	0.425547	0.575799
202	13.25	17.9	22.53	16.04	12.63	sp|P20700|LMNB1_HUMAN	Lamin-B1 OS=Homo sapiens GN=LMNB1 PE=1 SV=2	HUMAN	10	0.823506	0.240692	1.43082	0.575547	1.17829	1.02601	0.867006	1.41855	0.723282	1.45546
203	13.25	13.35	72.22	59.26	51.85	sp|O75347|TBCA_HUMAN	Tubulin-specific chaperone A OS=Homo sapiens GN=TBCA PE=1 SV=3	HUMAN	9	1.47017	0.0458656	1.45659	1.00932	2.14143	1.07846	0.422615	1.23339	0.874384	1.33017
204	13.23	13.23	68.89	58.89	51.11	sp|P05204|HMGN2_HUMAN	Non-histone chromosomal protein HMG-17 OS=Homo sapiens GN=HMGN2 PE=1 SV=3	HUMAN	7	1.27828	0.320627	1.77315	0.720911	2.26658	3.27273	0.00580719	1.9382	1.68854	6.34321
205	13.18	14.64	27.56	22.1	19.59	tr|Q14UF6|Q14UF6_HUMAN	Complement decay-accelerating factor OS=Homo sapiens GN=DAF PE=2 SV=1	HUMAN	9	0.776548	0.0186058	1.20862	0.642507	0.938553	0.754353	0.0105008	1.19958	0.628849	0.904903
206	13.11	13.13	47.18	38.73	33.8	sp|Q14019|COTL1_HUMAN	Coactosin-like protein OS=Homo sapiens GN=COTL1 PE=1 SV=3	HUMAN	9	1.99876	3.6021e-06	1.15314	1.73331	2.30485	2.42449	8.09599e-05	1.32096	1.83541	3.20265
207	13.04	13.12	35.14	25.68	19.82	sp|P09210|GSTA2_HUMAN	Glutathione S-transferase A2 OS=Homo sapiens GN=GSTA2 PE=1 SV=4	HUMAN	6	1.43446	0.0327498	1.38099	1.03872	1.98096	0.923092	0.724463	1.65762	0.556879	1.53013
208	12.98	13.29	10.08	5.458	4.059	sp|O75882|ATRN_HUMAN	Attractin OS=Homo sapiens GN=ATRN PE=1 SV=2	HUMAN	7	0.58888	0.000251947	1.21665	0.484018	0.716461	0.814205	0.193685	1.3966	0.58299	1.13712
209	12.84	15.52	24.81	17.94	16.79	sp|P05186|PPBT_HUMAN	Alkaline phosphatase, tissue-nonspecific isozyme OS=Homo sapiens GN=ALPL PE=1 SV=4	HUMAN	9	1.01123	0.958629	1.65752	0.610085	1.67614	1.08388	0.641221	1.49462	0.725188	1.62
210	12.56	12.65	29.46	22.77	18.75	sp|P30041|PRDX6_HUMAN	Peroxiredoxin-6 OS=Homo sapiens GN=PRDX6 PE=1 SV=3	HUMAN	8	1.05318	0.79581	1.59778	0.65915	1.68274	0.634976	0.000497004	1.17766	0.539183	0.747788
211	12.42	12.48	54.86	40	36.57	sp|P02792|FRIL_HUMAN	Ferritin light chain OS=Homo sapiens GN=FTL PE=1 SV=2	HUMAN	7	0.75267	0.00439125	1.16965	0.643499	0.880361	0.366556	2.60872e-05	1.23827	0.296023	0.453894
212	12.4	12.43	24.79	21.27	13.07	sp|P04003|C4BPA_HUMAN	C4b-binding protein alpha chain OS=Homo sapiens GN=C4BPA PE=1 SV=2	HUMAN	9	0.0910268	4.2175e-05	1.87512	0.0485445	0.170686	0.201287	0.000603277	1.90265	0.105793	0.38298
213	12.22	12.25	14.01	12.75	11.48	tr|E7EPC6|E7EPC6_HUMAN	CD44 antigen OS=Homo sapiens GN=CD44 PE=4 SV=2	HUMAN	10	1.1643	0.238074	1.32859	0.876339	1.54688	1.05785	0.745153	1.4982	0.70608	1.58487
214	12.17	12.24	28.85	20.93	17.18	tr|J3KQ45|J3KQ45_HUMAN	Trans-Golgi network integral membrane protein 2 OS=Homo sapiens GN=TGOLN2 PE=4 SV=1	HUMAN	6	1.04728	0.517304	1.17865	0.888543	1.23437	1.04967	0.729427	1.38716	0.756707	1.45606
215	12.13	12.46	18.56	8.133	7.216	tr|E9PFU1|E9PFU1_HUMAN	Programmed cell death 6-interacting protein OS=Homo sapiens GN=PDCD6IP PE=4 SV=1	HUMAN	6	1.08641	0.75062	1.88604	0.57603	2.04902	1.28883	0.408934	2.06287	0.624773	2.65868
216	12.09	12.09	62.77	48.94	38.3	tr|E9PBB5|E9PBB5_HUMAN	Trefoil factor 3 OS=Homo sapiens GN=TFF3 PE=4 SV=1	HUMAN	12	3.71393	0.0158898	2.32744	1.59572	8.64396	7.76956	0.0545361	8.36943	0.928327	65.0268
217	12.08	12.09	37.07	37.07	32.68	sp|P04792|HSPB1_HUMAN	Heat shock protein beta-1 OS=Homo sapiens GN=HSPB1 PE=1 SV=2	HUMAN	9	0.992932	0.934013	1.23307	0.805252	1.22435	0.820597	0.29579	1.54582	0.530848	1.2685
218	11.95	12.03	20.74	19.26	13.89	sp|Q16610|ECM1_HUMAN	Extracellular matrix protein 1 OS=Homo sapiens GN=ECM1 PE=1 SV=2	HUMAN	7	0.878282	0.448432	1.47948	0.593641	1.2994	0.522037	0.000851762	1.29551	0.402957	0.676306
219	11.9	11.96	28.11	20.74	19.35	sp|O60664|PLIN3_HUMAN	Perilipin-3 OS=Homo sapiens GN=PLIN3 PE=1 SV=3	HUMAN	6	0.760509	0.608355	3.62715	0.209671	2.75848	1.08212	0.833407	2.49867	0.433079	2.70386
220	11.89	11.98	22.92	13.45	13.45	sp|P14314|GLU2B_HUMAN	Glucosidase 2 subunit beta OS=Homo sapiens GN=PRKCSH PE=1 SV=2	HUMAN	8	1.00982	0.956592	1.50629	0.670402	1.52108	1.06231	0.763972	1.58071	0.672047	1.6792
221	11.88	12.05	21.43	16.73	13.35	tr|F5GXJ9|F5GXJ9_HUMAN	CD166 antigen OS=Homo sapiens GN=ALCAM PE=4 SV=1	HUMAN	6	1.06682	0.533792	1.27105	0.839325	1.35598	0.826677	0.114953	1.28758	0.642037	1.06442
222	11.86	13.95	29.87	24.68	19.81	sp|Q12841|FSTL1_HUMAN	Follistatin-related protein 1 OS=Homo sapiens GN=FSTL1 PE=1 SV=1	HUMAN	8	1.2214	0.299717	1.59426	0.766124	1.94724	0.801044	0.226682	1.53954	0.520315	1.23324
224	11.78	11.88	37.67	26.91	22.87	sp|P02743|SAMP_HUMAN	Serum amyloid P-component OS=Homo sapiens GN=APCS PE=1 SV=2	HUMAN	7	0.95314	0.809877	1.57506	0.605147	1.50125	0.553324	0.00758333	1.45871	0.379325	0.807138
225	11.74	12.01	92.39	81.52	39.13	sp|P80511|S10AC_HUMAN	Protein S100-A12 OS=Homo sapiens GN=S100A12 PE=1 SV=2	HUMAN	7	1.50759	0.0590274	1.54035	0.978726	2.32222	0.769578	0.0756154	1.3482	0.570817	1.03755
226	11.53	11.56	30	20.3	20.3	sp|Q6P5S2|CF058_HUMAN	UPF0762 protein C6orf58 OS=Homo sapiens GN=C6orf58 PE=1 SV=2	HUMAN	8	2.13898	0.00640466	1.61462	1.32476	3.45363	4.40214	0.00287881	2.24361	1.96208	9.87668
227	11.32	21.52	66.2	54.46	38.03	sp|P16403|H12_HUMAN	Histone H1.2 OS=Homo sapiens GN=HIST1H1C PE=1 SV=2	HUMAN	14	1.39356	0.309865	2.37757	0.586127	3.31328	2.75195	0.0341688	2.38572	1.15351	6.56538
229	11.24	11.32	41.98	20.99	18.7	tr|G3V4W0|G3V4W0_HUMAN	Heterogeneous nuclear ribonucleoproteins C1/C2 (Fragment) OS=Homo sapiens GN=HNRNPC PE=4 SV=1	HUMAN	6	1.24834	0.353204	1.74619	0.714894	2.17984	1.00816	0.938273	1.29271	0.779883	1.30326
230	11.19	11.22	15.2	14.37	14.37	sp|Q9NZP8|C1RL_HUMAN	Complement C1r subcomponent-like protein OS=Homo sapiens GN=C1RL PE=1 SV=2	HUMAN	6	0.561327	0.0217306	1.45119	0.386804	0.814594	0.626317	0.0819295	1.84915	0.338705	1.15816
231	11.12	15.27	45	31.43	23.1	sp|P80303|NUCB2_HUMAN	Nucleobindin-2 OS=Homo sapiens GN=NUCB2 PE=1 SV=2	HUMAN	9	1.77578	0.00591645	1.42829	1.24329	2.53633	2.74505	0.00379079	1.78227	1.54019	4.89242
232	11.09	11.22	24.26	16.46	15.19	sp|P48637|GSHB_HUMAN	Glutathione synthetase OS=Homo sapiens GN=GSS PE=1 SV=1	HUMAN	7	0.853375	0.492704	1.7351	0.491829	1.48069	1.26575	0.460656	2.13511	0.592826	2.70252
233	10.97	10.98	13.51	10.67	9.815	sp|P23142|FBLN1_HUMAN	Fibulin-1 OS=Homo sapiens GN=FBLN1 PE=1 SV=4	HUMAN	7	0.783343	0.306697	1.78427	0.439028	1.39769	0.515661	0.0296707	1.74291	0.295862	0.898749
234	10.89	11.23	27.95	26.22	22.77	sp|O43866|CD5L_HUMAN	CD5 antigen-like OS=Homo sapiens GN=CD5L PE=1 SV=1	HUMAN	6	0.146913	8.68148e-05	1.39162	0.10557	0.204446	0.19068	0.00244993	1.96799	0.0968908	0.375255
235	10.89	10.98	33.48	31.25	24.55	sp|P02741|CRP_HUMAN	C-reactive protein OS=Homo sapiens GN=CRP PE=1 SV=1	HUMAN	6	0.842298	0.335711	1.49385	0.563845	1.25826	0.436989	0.0168991	1.85575	0.235478	0.810942
236	10.87	11.04	36.14	34.16	34.16	sp|P05452|TETN_HUMAN	Tetranectin OS=Homo sapiens GN=CLEC3B PE=1 SV=3	HUMAN	8	0.755337	0.486198	2.61156	0.289228	1.97261	0.319499	7.45661e-05	1.2802	0.24957	0.409022
238	10.75	10.75	28.1	22.66	16.92	sp|P25774|CATS_HUMAN	Cathepsin S OS=Homo sapiens GN=CTSS PE=1 SV=3	HUMAN	6	0.93611	0.687728	1.46644	0.638355	1.37275	1.3684	0.0740601	1.42659	0.959209	1.95214
239	10.64	43.22	80.24	72.58	67.34	sp|P67936|TPM4_HUMAN	Tropomyosin alpha-4 chain OS=Homo sapiens GN=TPM4 PE=1 SV=3	HUMAN	31	0.979873	0.887171	1.41933	0.690378	1.39076	1.1932	0.155932	1.31265	0.908994	1.56625
240	10.63	10.67	45.26	41.05	35.79	sp|P25815|S100P_HUMAN	Protein S100-P OS=Homo sapiens GN=S100P PE=1 SV=2	HUMAN	7	2.63448	0.00345347	1.61366	1.63261	4.25116	2.0846	0.0188948	1.73789	1.1995	3.6228
241	10.61	10.84	24.07	11.36	9.153	tr|G3XAD8|G3XAD8_HUMAN	Stress-induced-phosphoprotein 1 OS=Homo sapiens GN=STIP1 PE=4 SV=1	HUMAN	6	1.59985	0.00610159	1.33227	1.20085	2.13144	1.58528	0.0220498	1.45065	1.0928	2.2997
242	10.58	32.51	47.1	35.36	27.9	sp|P08238|HS90B_HUMAN	Heat shock protein HSP 90-beta OS=Homo sapiens GN=HSP90AB1 PE=1 SV=4	HUMAN	19	0.797117	0.56983	3.10812	0.256462	2.47754	0.937353	0.872482	3.2503	0.288389	3.04668
243	10.53	18.16	62.9	56.85	40.73	sp|P31947|1433S_HUMAN	14-3-3 protein sigma OS=Homo sapiens GN=SFN PE=1 SV=1	HUMAN	13	3.39368	0.0383862	3.05153	1.11212	10.3559	2.78373	0.1113	4.03533	0.68984	11.2333
244	10.46	14.77	14.79	11.49	9.37	sp|P08123|CO1A2_HUMAN	Collagen alpha-2(I) chain OS=Homo sapiens GN=COL1A2 PE=1 SV=7	HUMAN	11	1.35839	0.301098	2.59535	0.523392	3.52549	0.979272	0.943761	3.10005	0.315889	3.03579
245	10.44	12.33	26.14	17.61	14.2	tr|F5H098|F5H098_HUMAN	Malate dehydrogenase, cytoplasmic OS=Homo sapiens GN=MDH1 PE=3 SV=1	HUMAN	7	1.01883	0.89753	1.39152	0.732171	1.41772	0.954178	0.784814	1.47839	0.645418	1.41064
246	10.4	10.4	59.07	39.07	29.3	sp|P09429|HMGB1_HUMAN	High mobility group protein B1 OS=Homo sapiens GN=HMGB1 PE=1 SV=3	HUMAN	7	1.27982	0.237409	1.60444	0.797672	2.0534	1.60622	0.0266008	1.47989	1.08537	2.37703
247	10.37	10.38	50.5	39.6	39.6	sp|P26447|S10A4_HUMAN	Protein S100-A4 OS=Homo sapiens GN=S100A4 PE=1 SV=1	HUMAN	7	1.42152	0.0380816	1.37058	1.03716	1.9483	1.0066	0.961468	1.49	0.675566	1.49983
248	10.32	10.38	40.44	39.89	39.89	sp|P02794|FRIH_HUMAN	Ferritin heavy chain OS=Homo sapiens GN=FTH1 PE=1 SV=2	HUMAN	8	0.618392	0.0429237	1.58112	0.39111	0.97775	0.491325	0.0299547	1.83708	0.267448	0.902603
249	10.27	10.35	29.6	21.6	16.53	sp|P35247|SFTPD_HUMAN	Pulmonary surfactant-associated protein D OS=Homo sapiens GN=SFTPD PE=1 SV=3	HUMAN	8	0.384882	0.000558879	1.30301	0.295379	0.501505	0.20226	0.0560542	5.28202	0.0382922	1.06834
250	10.22	10.28	51.63	36.96	30.43	sp|P63241-2|IF5A1_HUMAN	Isoform 2 of Eukaryotic translation initiation factor 5A-1 OS=Homo sapiens GN=EIF5A	HUMAN	7	2.42248	0.00619964	1.5933	1.52042	3.85974	1.15152	0.707197	2.63939	0.436282	3.03932
251	10.18	10.47	17.87	11.79	10.84	tr|C9JIZ6|C9JIZ6_HUMAN	Saposin-D OS=Homo sapiens GN=PSAP PE=4 SV=1	HUMAN	6	0.98559	0.954293	1.93605	0.509071	1.90816	1.04082	0.889746	2.12142	0.490623	2.20802
252	10.06	12.09	8.661	5.433	4.094	sp|Q92954-4|PRG4_HUMAN	Isoform D of Proteoglycan 4 OS=Homo sapiens GN=PRG4	HUMAN	7	0.394852	0.000351468	1.40623	0.280787	0.555253	0.395898	6.44051e-05	1.29627	0.305414	0.51319
253	10.01	10.21	19.95	18.78	17.61	tr|Q5JP53|Q5JP53_HUMAN	Tubulin beta chain OS=Homo sapiens GN=TUBB PE=3 SV=1	HUMAN	7	0.523637	0.587789	77.5426	0.0067529	40.6042	0.788966	0.623235	5.88948	0.133962	4.6466
254	9.91	10.02	29.85	23.88	19.7	sp|P09668|CATH_HUMAN	Pro-cathepsin H OS=Homo sapiens GN=CTSH PE=1 SV=4	HUMAN	6	0.750662	0.23008	1.75557	0.427589	1.31784	0.790294	0.259545	1.64496	0.480433	1.3
255	9.86	9.97	32.13	21.88	10.25	sp|P00338-3|LDHA_HUMAN	Isoform 3 of L-lactate dehydrogenase A chain OS=Homo sapiens GN=LDHA	HUMAN	7	1.18797	0.14016	1.28758	0.922639	1.52961	1.15388	0.177855	1.26467	0.912398	1.45927
256	9.83	9.87	40	31.28	31.28	sp|Q9ULZ3|ASC_HUMAN	Apoptosis-associated speck-like protein containing a CARD OS=Homo sapiens GN=PYCARD PE=1 SV=2	HUMAN	5	1.38055	0.206988	1.89576	0.728231	2.61719	1.52376	0.0162549	1.31447	1.15922	2.00294
257	9.8	9.89	15.55	10.7	8.696	sp|Q16881-3|TRXR1_HUMAN	Isoform 3 of Thioredoxin reductase 1, cytoplasmic OS=Homo sapiens GN=TXNRD1	HUMAN	5	1.06996	0.739782	1.69419	0.631546	1.81272	1.69343	0.0396848	1.62639	1.04122	2.75417
258	9.79	9.86	4.418	1.708	1.366	sp|P98160|PGBM_HUMAN	Basement membrane-specific heparan sulfate proteoglycan core protein OS=Homo sapiens GN=HSPG2 PE=1 SV=4	HUMAN	5	0.588249	0.11243	2.03244	0.28943	1.19558	0.353014	0.0381869	2.60533	0.135497	0.919717
259	9.76	11.14	43.48	30.43	21.74	tr|Q6P452|Q6P452_HUMAN	Annexin OS=Homo sapiens GN=ANXA4 PE=2 SV=1	HUMAN	8	1.38037	0.399461	2.58516	0.533958	3.56847	1.31367	0.257486	1.77537	0.73994	2.33224
260	9.75	9.91	22.17	12.7	12.7	sp|P20061|TCO1_HUMAN	Transcobalamin-1 OS=Homo sapiens GN=TCN1 PE=1 SV=2	HUMAN	7	2.55958	0.0312664	2.08004	1.23055	5.32403	5.4328	0.0044382	1.62708	3.33898	8.83962
261	9.74	9.75	30.25	21.01	21.01	tr|B7Z6Z4|B7Z6Z4_HUMAN	Myosin light polypeptide 6 OS=Homo sapiens GN=MYL6 PE=2 SV=1	HUMAN	8	1.4118	0.0898751	1.52566	0.925368	2.15393	1.83436	0.0724186	1.98789	0.922766	3.6465
262	9.68	9.78	22.58	20.79	17.92	tr|B4E1N2|B4E1N2_HUMAN	Insulin-like growth factor-binding protein 7 OS=Homo sapiens GN=IGFBP7 PE=2 SV=1	HUMAN	5	1.61053	0.040554	1.55777	1.03387	2.50884	2.07268	0.0139728	1.62352	1.27666	3.36504
263	9.68	9.77	18.2	9.894	9.894	tr|E9PAU8|E9PAU8_HUMAN	Liver carboxylesterase 1 OS=Homo sapiens GN=CES1 PE=4 SV=1	HUMAN	5	0.593118	0.0122808	1.39702	0.424559	0.828598	0.714496	0.22165	1.90653	0.374762	1.36221
264	9.66	9.68	100	84.69	67.35	sp|P04080|CYTB_HUMAN	Cystatin-B OS=Homo sapiens GN=CSTB PE=1 SV=2	HUMAN	7	2.04059	0.00164673	1.38064	1.478	2.81732	2.16375	0.0278463	1.92415	1.12452	4.16338
265	9.64	10.56	17.77	12.35	9.983	sp|P07358|CO8B_HUMAN	Complement component C8 beta chain OS=Homo sapiens GN=C8B PE=1 SV=3	HUMAN	6	0.926444	0.188439	1.13202	0.818396	1.04876	0.47185	5.1502e-06	1.15426	0.408791	0.544637
266	9.64	9.94	68.15	54.07	39.26	sp|Q01469|FABP5_HUMAN	Fatty acid-binding protein, epidermal OS=Homo sapiens GN=FABP5 PE=1 SV=3	HUMAN	6	1.28647	0.0384446	1.25435	1.02561	1.61368	0.772641	0.0420302	1.27178	0.607525	0.982631
267	9.6	9.62	46.08	46.08	46.08	sp|P61604|CH10_HUMAN	10 kDa heat shock protein, mitochondrial OS=Homo sapiens GN=HSPE1 PE=1 SV=2	HUMAN	5	1.16979	0.415964	1.69907	0.688485	1.98755	0.892114	0.616814	1.92131	0.464326	1.71403
269	9.5	9.5	17.02	15.85	12.59	tr|E9PCE8|E9PCE8_HUMAN	Xaa-Pro dipeptidase OS=Homo sapiens GN=PEPD PE=3 SV=1	HUMAN	5	1.18465	0.416695	1.77497	0.667422	2.10271	1.76646	0.172913	2.76338	0.639239	4.88141
270	9.47	11.95	10.42	3.557	2.203	sp|P12111|CO6A3_HUMAN	Collagen alpha-3(VI) chain OS=Homo sapiens GN=COL6A3 PE=1 SV=5	HUMAN	9	1.99899	0.00372039	1.41637	1.41135	2.83131	1.39031	0.262421	1.95623	0.710709	2.71978
271	9.28	9.3	54.81	50	41.35	sp|P10599|THIO_HUMAN	Thioredoxin OS=Homo sapiens GN=TXN PE=1 SV=?		8	1.81666	0.000453451	1.27309	1.42697	2.31278	1.45673	0.00575756	1.26156	1.15471	1.83774
272	9.21	9.23	21.02	17.72	15.32	tr|A6NC48|A6NC48_HUMAN	ADP-ribosyl cyclase 2 OS=Homo sapiens GN=BST1 PE=4 SV=1	HUMAN	5	0.790268	0.0991919	1.34902	0.585808	1.06609	0.987555	0.970166	2.26858	0.435319	2.24035
275	9.01	9.02	58.97	48.08	39.74	sp|P07998|RNAS1_HUMAN	Ribonuclease pancreatic OS=Homo sapiens GN=RNASE1 PE=1 SV=4	HUMAN	7	0.958267	0.781362	4.54772	0.210714	4.35793	1.17995	0.370526	3.98906	0.295796	4.70689
276	8.92	8.92	32.8	30.4	25.2	sp|P17931|LEG3_HUMAN	Galectin-3 OS=Homo sapiens GN=LGALS3 PE=1 SV=5	HUMAN	7	1.35092	0.0587013	1.37162	0.984908	1.85296	1.8866	0.00109502	1.30374	1.44707	2.45964
277	8.9	9.04	16.4	9.453	8.567	tr|E9PDD1|E9PDD1_HUMAN	Vascular cell adhesion protein 1 OS=Homo sapiens GN=VCAM1 PE=4 SV=1	HUMAN	5	0.511779	0.0029061	1.2676	0.40374	0.648729	0.325092	0.0123107	1.93377	0.168113	0.628653
278	8.81	8.83	37.62	31.19	31.19	sp|P07360|CO8G_HUMAN	Complement component C8 gamma chain OS=Homo sapiens GN=C8G PE=1 SV=3	HUMAN	5	0.864492	0.123301	1.23066	0.702462	1.0639	0.470293	0.0128186	1.63065	0.288409	0.766882
279	8.73	9.89	20.05	13.45	12.22	sp|P54727|RD23B_HUMAN	UV excision repair protein RAD23 homolog B OS=Homo sapiens GN=RAD23B PE=1 SV=1	HUMAN	6	1.24894	0.338749	1.86461	0.669813	2.3288	1.14908	0.451341	1.66869	0.688614	1.91746
280	8.66	8.97	14.91	6.707	4.905	sp|Q9Y4L1|HYOU1_HUMAN	Hypoxia up-regulated protein 1 OS=Homo sapiens GN=HYOU1 PE=1 SV=1	HUMAN	5	0.913395	0.710426	1.76694	0.516935	1.61392	0.914376	0.839732	2.82127	0.3241	2.57971
281	8.62	8.62	27.22	23.96	20.41	sp|P09467|F16P1_HUMAN	Fructose-1,6-bisphosphatase 1 OS=Homo sapiens GN=FBP1 PE=1 SV=5	HUMAN	7	0.562795	0.0248324	1.48769	0.378301	0.837263	1.09784	0.724432	2.69322	0.40763	2.95672
282	8.6	8.69	32.66	32.66	24.62	sp|P37802|TAGL2_HUMAN	Transgelin-2 OS=Homo sapiens GN=TAGLN2 PE=1 SV=3	HUMAN	8	1.86289	0.0940919	2.26531	0.822354	4.22003	1.24711	0.214732	1.56509	0.79683	1.95183
283	8.59	8.59	43.75	42.97	36.72	sp|P02775|CXCL7_HUMAN	Platelet basic protein OS=Homo sapiens GN=PPBP PE=1 SV=3	HUMAN	5	0.946624	0.643911	1.33236	0.710484	1.26125	2.11789	0.00672077	1.54318	1.37242	3.26829
284	8.56	8.89	20.46	13.58	8.02	sp|P09960|LKHA4_HUMAN	Leukotriene A-4 hydrolase OS=Homo sapiens GN=LTA4H PE=1 SV=2	HUMAN	6	0.992483	0.978235	2.87046	0.345758	2.84888	0.858538	0.436783	1.97559	0.434572	1.69612
285	8.52	10.19	36.31	31.38	26.15	sp|P14550|AK1A1_HUMAN	Alcohol dehydrogenase [NADP(+)] OS=Homo sapiens GN=AKR1A1 PE=1 SV=3	HUMAN	6	1.31938	0.629041	5.18017	0.254698	6.83462	1.04873	0.934848	5.50228	0.190599	5.7704
286	8.45	8.55	75	68.42	60.53	sp|Q15847|APM2_HUMAN	Adipose most abundant gene transcript 2 protein OS=Homo sapiens GN=APM2 PE=1 SV=1	HUMAN	7	1.65365	0.126799	3.63282	0.455196	6.0074	0.474055	0.08699	3.68429	0.128669	1.74656
287	8.41	10.28	33.05	32.62	17.17	sp|O75015|FCG3B_HUMAN	Low affinity immunoglobulin gamma Fc region receptor III-B OS=Homo sapiens GN=FCGR3B PE=1 SV=2	HUMAN	6	0.886252	0.567726	1.63053	0.543535	1.44506	0.854175	0.460167	1.63047	0.523884	1.3927
288	8.38	8.38	31.67	23.33	20.83	sp|Q96C19|EFHD2_HUMAN	EF-hand domain-containing protein D2 OS=Homo sapiens GN=EFHD2 PE=1 SV=1	HUMAN	7	1.33209	0.0442024	1.31609	1.01215	1.75316	1.95986	0.0351126	1.81551	1.07951	3.55814
289	8.27	8.44	25	22.38	16.28	sp|P40199|CEAM6_HUMAN	Carcinoembryonic antigen-related cell adhesion molecule 6 OS=Homo sapiens GN=CEACAM6 PE=1 SV=3	HUMAN	4	0.53976	0.484541	22.6252	0.0238566	12.2122	0.704274	0.0661649	1.50472	0.468044	1.05974
290	8.25	8.26	48.63	41.78	41.78	sp|P12273|PIP_HUMAN	Prolactin-inducible protein OS=Homo sapiens GN=PIP PE=1 SV=1	HUMAN	6	0.858925	0.567716	1.89568	0.453096	1.62825	2.05331	0.0327788	1.88162	1.09125	3.86355
291	8.25	8.25	19.47	14.21	12.37	sp|P50552|VASP_HUMAN	Vasodilator-stimulated phosphoprotein OS=Homo sapiens GN=VASP PE=1 SV=3	HUMAN	7	1.81041	0.00297852	1.29119	1.40212	2.33758	3.3106	0.00403843	1.75042	1.89131	5.79495
292	8.23	8.6	34.3	30.43	19.81	sp|P01033|TIMP1_HUMAN	Metalloproteinase inhibitor 1 OS=Homo sapiens GN=TIMP1 PE=1 SV=1	HUMAN	6	1.07263	0.559008	1.54367	0.694857	1.65578	0.480252	0.0397789	1.91359	0.25097	0.919004
293	8.2	8.28	30.55	20.1	16.71	sp|P36222|CH3L1_HUMAN	Chitinase-3-like protein 1 OS=Homo sapiens GN=CHI3L1 PE=1 SV=2	HUMAN	6	0.465729	0.344891	8.79487	0.0529546	4.09602	0.913835	0.815711	3.08805	0.295926	2.82197
294	8.17	14.69	47.15	33.33	26.42	sp|Q04917|1433F_HUMAN	14-3-3 protein eta OS=Homo sapiens GN=YWHAH PE=1 SV=4	HUMAN	12	1.22029	0.660607	72.7224	0.0167801	88.7423	0.991619	0.949331	3.82209	0.259444	3.79006
296	8.1	8.2	26.6	20.21	20.21	sp|O75223|GGCT_HUMAN	Gamma-glutamylcyclotransferase OS=Homo sapiens GN=GGCT PE=1 SV=1	HUMAN	5	1.46402	0.169376	3.74303	0.391133	5.47988	0.990722	0.978866	35.3795	0.0280027	35.0512
297	8.09	8.15	26.01	17.23	17.23	tr|H3BT71|H3BT71_HUMAN	RNA-binding motif protein, X chromosome OS=Homo sapiens GN=RBMX PE=4 SV=1	HUMAN	6	0.628639	0.0849836	1.79045	0.351107	1.12555	0.654485	0.0342756	1.43986	0.454546	0.94237
298	8.08	16.31	61.48	40.98	40.98	sp|P0DJI9|SAA2_HUMAN	Serum amyloid A-2 protein OS=Homo sapiens GN=SAA2 PE=1 SV=1	HUMAN	12	0.408258					0.314902
299	8.06	8.14	22.72	11.8	11.8	tr|E7EVW7|E7EVW7_HUMAN	Hematopoietic lineage cell-specific protein OS=Homo sapiens GN=HCLS1 PE=4 SV=1	HUMAN	4	0.637904	0.555446	902.501	0.000706818	575.709	1.59224	0.58267	2176.83	0.00073145	3466.05
300	8.06	8.11	21.25	15.3	13.88	sp|P22626|ROA2_HUMAN	Heterogeneous nuclear ribonucleoproteins A2/B1 OS=Homo sapiens GN=HNRNPA2B1 PE=1 SV=2	HUMAN	5	0.736828	0.948766	7.85709e+20	9.37787e-22	5.78932e+20	0.17296	0.518085	17743609856	9.74774e-12	3.06894e+09
301	8.05	8.05	28.68	24.81	22.09	sp|P22692|IBP4_HUMAN	Insulin-like growth factor-binding protein 4 OS=Homo sapiens GN=IGFBP4 PE=1 SV=2	HUMAN	5	0.613126	0.22076	2.74427	0.223421	1.68258	0.404491	0.00131271	1.2768	0.316801	0.516453
302	8.04	8.15	64.13	55.43	36.96	tr|H0YDD8|H0YDD8_HUMAN	60S acidic ribosomal protein P2 (Fragment) OS=Homo sapiens GN=RPLP2 PE=4 SV=1	HUMAN	5	1.01906					1.28025
303	8.04	8.12	12.48	4.79	4.79	sp|O95436-2|NPT2B_HUMAN	Isoform 2 of Sodium-dependent phosphate transport protein 2B OS=Homo sapiens GN=SLC34A2	HUMAN	4	1.83792					2.34744
304	8.04	8.11	13.61	10.02	8.696	sp|Q6UX71|PXDC2_HUMAN	Plexin domain-containing protein 2 OS=Homo sapiens GN=PLXDC2 PE=1 SV=1	HUMAN	4	1.12312	0.24719	1.26879	0.885193	1.425	0.907508	0.547034	1.50689	0.602239	1.36751
305	8.04	8.08	21.38	13.52	13.52	sp|Q92820|GGH_HUMAN	Gamma-glutamyl hydrolase OS=Homo sapiens GN=GGH PE=1 SV=2	HUMAN	4	0.941687	0.472252	1.26253	0.745872	1.18891	1.40733	0.0188891	1.26419	1.11323	1.77914
306	8.02	8.04	21.59	17.18	17.18	sp|Q96S96|PEBP4_HUMAN	Phosphatidylethanolamine-binding protein 4 OS=Homo sapiens GN=PEBP4 PE=1 SV=3	HUMAN	5	0.416997	0.0135794	1.55755	0.267726	0.649494	0.325682	0.00661734	1.48386	0.219484	0.483265
307	8.01	8.01	17.74	9.946	9.946	sp|P14151|LYAM1_HUMAN	L-selectin OS=Homo sapiens GN=SELL PE=1 SV=2	HUMAN	6	0.659159	0.0449448	1.48232	0.44468	0.977085	0.772653	0.117849	1.52042	0.508185	1.17475
308	7.56	8.31	15.38	4.199	1.938	sp|Q13813-2|SPTN1_HUMAN	Isoform 2 of Spectrin alpha chain, non-erythrocytic 1 OS=Homo sapiens GN=SPTAN1	HUMAN	4	1.1126	0.517833	1.51918	0.73237	1.69025	0.916635	0.685539	1.74126	0.526421	1.5961
309	7.56	7.64	20.59	11.76	9.559	sp|Q8NC51|PAIRB_HUMAN	Plasminogen activator inhibitor 1 RNA-binding protein OS=Homo sapiens GN=SERBP1 PE=1 SV=2	HUMAN	4	0.958441	0.752888	1.41823	0.675803	1.35929	1.46948	0.0600548	1.50829	0.974265	2.2164
310	7.55	7.72	17.06	7.58	5.394	tr|H0YAC1|H0YAC1_HUMAN	Plasma kallikrein light chain (Fragment) OS=Homo sapiens GN=KLKB1 PE=3 SV=1	HUMAN	9	0.301344	8.475e-05	1.22805	0.245385	0.370064	0.335754	0.00242432	1.55989	0.215243	0.523739
311	7.5	7.54	15.23	10.22	6.613	sp|P05546|HEP2_HUMAN	Heparin cofactor 2 OS=Homo sapiens GN=SERPIND1 PE=1 SV=3	HUMAN	4	0.668846	0.122921	1.77268	0.377307	1.18565	0.848433	0.77474	4.43798	0.191175	3.76533
312	7.48	7.49	36.02	27.2	19.92	sp|Q14847|LASP1_HUMAN	LIM and SH3 domain protein 1 OS=Homo sapiens GN=LASP1 PE=1 SV=2	HUMAN	7	1.3229	0.529	2.8984	0.456426	3.83431	1.53519	0.452679	3.8728	0.396403	5.94548
313	7.47	7.78	7.008	2.326	1.649	sp|P13611|CSPG2_HUMAN	Versican core protein OS=Homo sapiens GN=VCAN PE=1 SV=3	HUMAN	5	1.50988	0.217134	2.70845	0.557471	4.08945	1.03918	0.795054	1.74784	0.594547	1.81631
314	7.44	9.74	16.31	11.63	8.936	sp|P00736|C1R_HUMAN	Complement C1r subcomponent OS=Homo sapiens GN=C1R PE=1 SV=2	HUMAN	6	0.698012	0.15776	2.01413	0.346557	1.40589	0.509862	0.0164658	1.45733	0.349859	0.743039
315	7.35	7.61	16.76	6.039	2.775	sp|P20908|CO5A1_HUMAN	Collagen alpha-1(V) chain OS=Homo sapiens GN=COL5A1 PE=1 SV=3	HUMAN	4	2.32978	0.0334484	1.97951	1.17695	4.61181	2.51996	0.0360735	2.1739	1.15919	5.47815
316	7.3	7.56	26.31	17.98	10.83	sp|P34932|HSP74_HUMAN	Heat shock 70 kDa protein 4 OS=Homo sapiens GN=HSPA4 PE=1 SV=4	HUMAN	7	1.54296	0.0596086	1.58696	0.972273	2.44863	1.39539	0.129858	1.62601	0.858164	2.26892
317	7.28	7.38	28.91	21.09	21.09	sp|Q71UI9|H2AV_HUMAN	Histone H2A.V OS=Homo sapiens GN=H2AFV PE=1 SV=3	HUMAN	4	0.756825					1.79578
318	7.26	7.8	13.41	5.355	2.22	tr|E7EVA0|E7EVA0_HUMAN	Microtubule-associated protein OS=Homo sapiens GN=MAP4 PE=4 SV=1	HUMAN	5	0.893843	0.619319	1.78499	0.500754	1.5955	0.878348	0.394009	1.45843	0.602258	1.281
319	7.26	7.28	22.13	18.4	12.8	sp|P08571|CD14_HUMAN	Monocyte differentiation antigen CD14 OS=Homo sapiens GN=CD14 PE=1 SV=2	HUMAN	5	0.832517	0.449319	2.3289	0.357472	1.93885	0.98874	0.974514	3.86322	0.255937	3.81972
320	7.25	7.25	40.66	30.77	30.77	sp|P55145|MANF_HUMAN	Mesencephalic astrocyte-derived neurotrophic factor OS=Homo sapiens GN=MANF PE=1 SV=3	HUMAN	4	1.26191	0.059887	1.2849	0.98211	1.62142	2.11952	0.00246856	1.28589	1.64829	2.72547
321	7.21	8.25	9.392	4.586	2.21	tr|G3XAI2|G3XAI2_HUMAN	Laminin subunit beta-1 OS=Homo sapiens GN=LAMB1 PE=4 SV=1	HUMAN	4	1.72766	0.00538508	1.34949	1.28023	2.33146	1.48667	0.128908	1.75258	0.848271	2.60551
322	7.2	17.71	19.65	14.49	10.76	sp|O43707|ACTN4_HUMAN	Alpha-actinin-4 OS=Homo sapiens GN=ACTN4 PE=1 SV=2	HUMAN	10	1.05697	0.814124	1.98814	0.531634	2.1014	1.04004	0.734728	1.39933	0.743242	1.45537
323	7.13	7.23	13.99	7.809	4.429	sp|P13639|EF2_HUMAN	Elongation factor 2 OS=Homo sapiens GN=EEF2 PE=1 SV=4	HUMAN	4	1.12665	0.776156	3.38737	0.332602	3.81636	1.56022	0.315398	3.24464	0.480861	5.06235
324	7.07	7.07	48.51	37.62	37.62	sp|P31151|S10A7_HUMAN	Protein S100-A7 OS=Homo sapiens GN=S100A7 PE=1 SV=4	HUMAN	4	0.235966	0.00349768	1.44551	0.163241	0.341091	0.273231	0.00441643	1.451	0.188305	0.396457
325	7.03	7.03	45.79	30.84	29.91	tr|B8ZZQ6|B8ZZQ6_HUMAN	Prothymosin alpha OS=Homo sapiens GN=PTMA PE=4 SV=1	HUMAN	7
326	7	7.01	20.34	13.49	8.994	sp|P22894|MMP8_HUMAN	Neutrophil collagenase OS=Homo sapiens GN=MMP8 PE=1 SV=1	HUMAN	5	1.1611	0.425582	1.6767	0.692493	1.94682	1.3349	0.272501	1.9849	0.672526	2.64964
327	6.97	6.97	20.53	15.79	15.79	sp|O75995|SASH3_HUMAN	SAM and SH3 domain-containing protein 3 OS=Homo sapiens GN=SASH3 PE=1 SV=2	HUMAN	4	0.802561	0.504886	2.52552	0.31778	2.02688	0.94218	0.925736	6.49923	0.144968	6.12344
328	6.91	7.05	13.29	10.32	10.32	sp|P78324|SHPS1_HUMAN	Tyrosine-protein phosphatase non-receptor type substrate 1 OS=Homo sapiens GN=SIRPA PE=1 SV=2	HUMAN	5	0.833319	0.364524	1.72319	0.483591	1.43597	1.29381	0.0895785	1.3924	0.929197	1.80149
329	6.91	7.01	15.45	12.85	7.292	sp|Q96PD5|PGRP2_HUMAN	N-acetylmuramoyl-L-alanine amidase OS=Homo sapiens GN=PGLYRP2 PE=1 SV=1	HUMAN	4	0.651724	0.117602	2.00291	0.325389	1.30534	0.592098	0.0845434	2.01569	0.293745	1.19349
330	6.86	7	23.62	12.13	9.574	tr|B4DQJ8|B4DQJ8_HUMAN	6-phosphogluconate dehydrogenase, decarboxylating OS=Homo sapiens GN=PGD PE=2 SV=1	HUMAN	4	1.13589	0.468403	1.5558	0.730097	1.76721	1.87657	0.0817837	2.12872	0.881548	3.99471
331	6.85	7	38.14	30.51	30.51	sp|P58546|MTPN_HUMAN	Myotrophin OS=Homo sapiens GN=MTPN PE=1 SV=2	HUMAN	5	2.15919					1.14791
332	6.83	10.08	53.94	48.48	41.21	sp|P60981|DEST_HUMAN	Destrin OS=Homo sapiens GN=DSTN PE=1 SV=3	HUMAN	8	1.63144	0.324861	5.08986	0.320527	8.30377	0.738586	0.307324	2.61174	0.282795	1.92899
333	6.83	6.85	22.71	14.85	14.85	sp|P09497|CLCB_HUMAN	Clathrin light chain B OS=Homo sapiens GN=CLTB PE=1 SV=1	HUMAN	5	0.864402	0.474643	2.05052	0.421552	1.77248	0.84322	0.46151	2.25221	0.374396	1.89911
334	6.81	6.85	23.38	14.93	13.24	sp|P27169|PON1_HUMAN	Serum paraoxonase/arylesterase 1 OS=Homo sapiens GN=PON1 PE=1 SV=3	HUMAN	4	0.222178	0.00682125	2.04583	0.1086	0.454538	0.14897	0.013791	3.20356	0.0465016	0.477235
335	6.79	6.8	40.77	22.31	22.31	sp|P35542|SAA4_HUMAN	Serum amyloid A-4 protein OS=Homo sapiens GN=SAA4 PE=1 SV=2	HUMAN	4	0.248274	0.000369231	1.27792	0.194279	0.317275	0.304195	0.00878789	1.85749	0.163766	0.56504
336	6.78	6.78	28.62	20.62	14.77	sp|P18065|IBP2_HUMAN	Insulin-like growth factor-binding protein 2 OS=Homo sapiens GN=IGFBP2 PE=1 SV=2	HUMAN	5	1.1888	0.570921	2.17875	0.545636	2.5901	1.08035	0.706351	1.69902	0.63587	1.83554
337	6.67	6.67	25.49	14.9	14.9	sp|P08311|CATG_HUMAN	Cathepsin G OS=Homo sapiens GN=CTSG PE=1 SV=2	HUMAN	6	1.59392	0.0850094	1.79508	0.887935	2.86121	1.49636	0.0105954	1.25125	1.19589	1.87232
338	6.64	6.86	27.54	17.39	13.41	tr|J3KPA1|J3KPA1_HUMAN	Cysteine-rich secretory protein 3 OS=Homo sapiens GN=CRISP3 PE=4 SV=1	HUMAN	4	2.17322	0.00643093	1.51112	1.43815	3.284	3.87044	0.0136838	2.44557	1.58263	9.46545
340	6.5	6.52	51.43	40.95	40.95	sp|P31949|S10AB_HUMAN	Protein S100-A11 OS=Homo sapiens GN=S100A11 PE=1 SV=2	HUMAN	7	1.99495	0.0238936	1.74057	1.14615	3.47236	1.39107	0.135155	1.61073	0.863624	2.24064
342	6.45	6.6	22.6	12.12	9.584	sp|Q6P4A8|PLBL1_HUMAN	Phospholipase B-like 1 OS=Homo sapiens GN=PLBD1 PE=1 SV=2	HUMAN	6	0.971763	0.926097	2.47082	0.393296	2.40105	3.56364	0.11633	6.34071	0.562026	22.596
344	6.36	6.36	19.88	19.88	19.88	sp|P10153|RNAS2_HUMAN	Non-secretory ribonuclease OS=Homo sapiens GN=RNASE2 PE=1 SV=2	HUMAN	4	0.525678	0.488384	2638.43	0.000199239	1386.96	0.664555	0.533915	322.808	0.00205867	214.524
345	6.28	7.71	33.53	17.37	17.37	sp|P07195|LDHB_HUMAN	L-lactate dehydrogenase B chain OS=Homo sapiens GN=LDHB PE=1 SV=2	HUMAN	7	1.1574	0.342623	1.51224	0.765352	1.75026	1.35349	0.448948	3.03062	0.446604	4.1019
346	6.21	6.21	32.21	32.21	28.19	sp|Q15828|CYTM_HUMAN	Cystatin-M OS=Homo sapiens GN=CST6 PE=1 SV=1	HUMAN	3	0.967605	0.813323	1.50181	0.644292	1.45316	0.728057	0.111739	1.57202	0.463134	1.14452
347	6.19	6.44	23.35	12.18	10.78	sp|P00352|AL1A1_HUMAN	Retinal dehydrogenase 1 OS=Homo sapiens GN=ALDH1A1 PE=1 SV=2	HUMAN	4	0.858727	0.370108	3.56671	0.240762	3.06283	1.04448	0.827497	7.31845	0.142718	7.64396
348	6.16	6.23	13.28	8.918	7.4	sp|P43121-2|MUC18_HUMAN	Isoform 2 of Cell surface glycoprotein MUC18 OS=Homo sapiens GN=MCAM	HUMAN	4	0.60296	0.00568165	1.25334	0.481082	0.755715	1.10738	0.830816	4.02868	0.274874	4.46127
349	6.12	6.12	39.25	35.51	29.91	sp|P09341|GROA_HUMAN	Growth-regulated alpha protein OS=Homo sapiens GN=CXCL1 PE=1 SV=1	HUMAN	3	2.57715	0.10831	4.31542	0.597195	11.1215	2.00226	0.0349443	1.77465	1.12825	3.5533
350	6.1	6.13	32.81	29.69	25	sp|P13987|CD59_HUMAN	CD59 glycoprotein OS=Homo sapiens GN=CD59 PE=1 SV=1	HUMAN	3	0.6467	0.245713	3.17202	0.203876	2.05135	0.783766	0.712355	11.8027	0.0664054	9.25059
351	6.08	23.91	65.32	58.47	52.42	tr|H7BYY1|H7BYY1_HUMAN	Tropomyosin 1 (Alpha), isoform CRA_m OS=Homo sapiens GN=TPM1 PE=3 SV=1	HUMAN	20	1.29419	0.0879151	1.42294	0.909521	1.84155	1.25553	0.255322	1.85997	0.675028	2.33524
352	6.08	6.53	10.68	3.621	2.414	sp|P46940|IQGA1_HUMAN	Ras GTPase-activating-like protein IQGAP1 OS=Homo sapiens GN=IQGAP1 PE=1 SV=1	HUMAN	3	0.731123	0.118477	1.55045	0.471556	1.13357	0.785933	0.252294	1.64917	0.476564	1.29613
354	6.04	6.87	20.17	8.034	4.786	sp|Q9UH65|SWP70_HUMAN	Switch-associated protein 70 OS=Homo sapiens GN=SWAP70 PE=1 SV=1	HUMAN	3	0.96291	0.926121	61.5337	0.0156485	59.2514	1.68299	0.618402	16001	0.00010518	26929.5
355	6.04	6.35	17.37	7.32	5.087	sp|P55072|TERA_HUMAN	Transitional endoplasmic reticulum ATPase OS=Homo sapiens GN=VCP PE=1 SV=4	HUMAN	4	1.4169	0.669407	2311.64	0.00061294	3275.36	0.984678	0.906157	3.74807	0.262716	3.69064
356	6.04	6.12	50	44.32	38.64	tr|Q5T123|Q5T123_HUMAN	SH3 domain binding glutamic acid-rich protein like 3 OS=Homo sapiens GN=SH3BGRL3 PE=2 SV=1	HUMAN	5	2.36105	0.00629681	1.4881	1.58663	3.51347	2.71792	0.00139933	1.31765	2.06271	3.58126
357	6.04	6.04	36.63	26.73	26.73	tr|C9JFR7|C9JFR7_HUMAN	Cytochrome c (Fragment) OS=Homo sapiens GN=CYCS PE=3 SV=1	HUMAN	3	0.868771	0.125823	1.22427	0.709623	1.06361	0.556215	0.00132522	1.22581	0.453753	0.681815
358	6.02	6.07	24.04	15.38	15.38	sp|Q96DA0|ZG16B_HUMAN	Zymogen granule protein 16 homolog B OS=Homo sapiens GN=ZG16B PE=1 SV=3	HUMAN	3	0.575317	0.557471	14.4842	0.0397204	8.33299	1.22779	0.79632	10.1357	0.121135	12.4445
360	6.01	6.11	16.72	11.55	8.207	sp|O00151|PDLI1_HUMAN	PDZ and LIM domain protein 1 OS=Homo sapiens GN=PDLIM1 PE=1 SV=4	HUMAN	3	1.19006	0.337157	1.81856	0.654393	2.16419	1.18924	0.259416	1.61361	0.737005	1.91897
361	6	6.07	18.84	8.904	8.904	sp|Q07955-2|SRSF1_HUMAN	Isoform ASF-2 of Serine/arginine-rich splicing factor 1 OS=Homo sapiens GN=SRSF1	HUMAN	3	1.09844	0.525465	1.69875	0.646613	1.86597	1.10934	0.333944	1.42417	0.778942	1.57989
362	6	6.06	12.99	9.091	9.091	sp|P16083|NQO2_HUMAN	Ribosyldihydronicotinamide dehydrogenase [quinone] OS=Homo sapiens GN=NQO2 PE=1 SV=5	HUMAN	3	1.14309	0.439777	1.82515	0.6263	2.08631	0.974584	0.788384	1.43589	0.678732	1.39939
363	6	6.04	18.26	6.369	6.369	sp|P23381|SYWC_HUMAN	Tryptophan--tRNA ligase, cytoplasmic OS=Homo sapiens GN=WARS PE=1 SV=2	HUMAN	3	1.14763	0.395607	1.73722	0.660616	1.99368	2.31523	0.0094765	1.42501	1.62471	3.29924
364	6	6.01	16.79	9.16	9.16	sp|Q99536|VAT1_HUMAN	Synaptic vesicle membrane protein VAT-1 homolog OS=Homo sapiens GN=VAT1 PE=1 SV=2	HUMAN	3	0.753325	0.485629	31.1918	0.0241513	23.4976	1.24522	0.602057	47.5377	0.0261943	59.1947
365	6	6	20	18.33	18.33	sp|P24592|IBP6_HUMAN	Insulin-like growth factor-binding protein 6 OS=Homo sapiens GN=IGFBP6 PE=1 SV=1	HUMAN	3	0.757765	0.324303	7.1614	0.105812	5.42666	0.392306	0.20052	48.1227	0.0081522	18.8788
366	6	6	58.33	58.33	58.33	sp|P30047|GFRP_HUMAN	GTP cyclohydrolase 1 feedback regulatory protein OS=Homo sapiens GN=GCHFR PE=1 SV=3	HUMAN	3	0.803329	0.773825	1807.39	0.00044447	1451.92	1.62271	0.449674	190.175	0.00853273	308.598
367	5.91	6.09	17.28	12.31	9.287	sp|P53634|CATC_HUMAN	Dipeptidyl peptidase 1 OS=Homo sapiens GN=CTSC PE=1 SV=2	HUMAN	4	1.46003	0.175913	1.89608	0.770026	2.76834	1.51952	0.126589	1.82843	0.83105	2.77833
368	5.87	6.44	10.7	5.631	4.167	tr|E9PHP7|E9PHP7_HUMAN	Ectonucleotide pyrophosphatase/phosphodiesterase family member 2 OS=Homo sapiens GN=ENPP2 PE=4 SV=1	HUMAN	3	1.38336	0.467329	3.46892	0.398788	4.79878	1.03951	0.851979	1.83447	0.566654	1.90694
369	5.83	5.97	20.59	8.377	7.155	sp|P10809|CH60_HUMAN	60 kDa heat shock protein, mitochondrial OS=Homo sapiens GN=HSPD1 PE=1 SV=2	HUMAN	4	1.09019	0.663846	1.77185	0.615282	1.93164	1.22497	0.347957	1.78902	0.684713	2.1915
370	5.78	5.86	24.29	17.14	13.33	tr|Q5T9B7|Q5T9B7_HUMAN	Adenylate kinase OS=Homo sapiens GN=AK1 PE=2 SV=1	HUMAN	3	1.56124	0.140254	3.5523	0.439502	5.546	1.14593	0.402366	3.55129	0.322679	4.06952
371	5.75	7.13	27.19	22.36	14.5	sp|Q9Y266|NUDC_HUMAN	Nuclear migration protein nudC OS=Homo sapiens GN=NUDC PE=1 SV=1	HUMAN	5	1.37175	0.04965	1.37045	1.00095	1.87991	1.02149	0.927277	1.97845	0.516308	2.02096
372	5.66	5.74	42.12	24.66	23.29	tr|Q32Q12|Q32Q12_HUMAN	Nucleoside diphosphate kinase OS=Homo sapiens GN=NME1-NME2 PE=2 SV=1	HUMAN	3	1.46002	0.0732179	1.55972	0.936078	2.27722	0.752748	0.156937	1.61789	0.465264	1.21787
373	5.65	5.65	17.23	15.38	9.538	sp|Q96CX2|KCD12_HUMAN	BTB/POZ domain-containing protein KCTD12 OS=Homo sapiens GN=KCTD12 PE=1 SV=1	HUMAN	4	1.19977	0.533018	2.28208	0.525737	2.73798	1.13228	0.545453	1.78889	0.632949	2.02552
374	5.62	5.66	13.51	9.309	9.309	sp|P07711|CATL1_HUMAN	Cathepsin L1 OS=Homo sapiens GN=CTSL1 PE=1 SV=2	HUMAN	3	0.847824	0.226761	1.41409	0.599556	1.19889	1.53841	0.117766	1.87729	0.819485	2.88803
375	5.59	5.61	25.42	21.4	18.39	sp|O75636|FCN3_HUMAN	Ficolin-3 OS=Homo sapiens GN=FCN3 PE=1 SV=2	HUMAN	5	0.780279					1.10068
376	5.55	5.55	19.44	14.68	14.68	tr|G3V5Z7|G3V5Z7_HUMAN	Proteasome subunit alpha type OS=Homo sapiens GN=PSMA6 PE=3 SV=1	HUMAN	3	1.03527	0.911011	22.8689	0.0452695	23.6754	0.987788	0.978585	103.456	0.00954787	102.193
377	5.51	5.53	12.43	7.961	6.796	sp|P11413|G6PD_HUMAN	Glucose-6-phosphate 1-dehydrogenase OS=Homo sapiens GN=G6PD PE=1 SV=4	HUMAN	3	1.19311	0.395966	1.76583	0.675666	2.10684	1.85572	0.149378	2.77351	0.669088	5.14685
378	5.5	5.56	16.46	10.25	8.075	sp|P05089|ARGI1_HUMAN	Arginase-1 OS=Homo sapiens GN=ARG1 PE=1 SV=2	HUMAN	4	0.891158	0.452375	3.52538	0.252783	3.14167	0.902255	0.569266	5.09088	0.17723	4.59327
379	5.43	5.46	22.73	15.03	15.03	sp|P52907|CAZA1_HUMAN	F-actin-capping protein subunit alpha-1 OS=Homo sapiens GN=CAPZA1 PE=1 SV=3	HUMAN	4	0.896598					0.797185
380	5.42	5.65	27.78	15.61	14.29	sp|Q16543|CDC37_HUMAN	Hsp90 co-chaperone Cdc37 OS=Homo sapiens GN=CDC37 PE=1 SV=1	HUMAN	4	2.07155	0.129801	2.89344	0.715947	5.99389	2.41865	0.110043	3.31231	0.7302	8.01133
382	5.31	5.41	13.66	8.729	7.211	sp|O60506-4|HNRPQ_HUMAN	Isoform 4 of Heterogeneous nuclear ribonucleoprotein Q OS=Homo sapiens GN=SYNCRIP	HUMAN	3	0.798978	0.469725	2.37575	0.336306	1.89817	0.894268	0.772661	3.08028	0.290321	2.75459
383	5.19	5.38	46.57	13.73	10.78	tr|B4DUI3|B4DUI3_HUMAN	Eukaryotic translation initiation factor 3 subunit J OS=Homo sapiens GN=EIF3J PE=2 SV=1	HUMAN	3	1.32939	0.0761816	1.43189	0.928412	1.90354	1.71486	0.0480279	1.69521	1.0116	2.90704
384	5.17	5.29	16.18	8.937	7.246	sp|O75874|IDHC_HUMAN	Isocitrate dehydrogenase [NADP] cytoplasmic OS=Homo sapiens GN=IDH1 PE=1 SV=2	HUMAN	3	2.41922					3.78918
385	5.07	5.14	25.98	20.47	11.81	tr|D6RHI9|D6RHI9_HUMAN	Ribonuclease T2 (Fragment) OS=Homo sapiens GN=RNASET2 PE=3 SV=1	HUMAN	3	0.872734	0.680353	2.59365	0.336489	2.26356	1.554	0.380819	3.92984	0.395436	6.10697
386	5.05	5.08	22.35	11.73	11.73	tr|F5H7Y6|F5H7Y6_HUMAN	Ras-related protein Rap-1b OS=Homo sapiens GN=RAP1B PE=4 SV=1	HUMAN	3	0.960997	0.829916	6.33977	0.151582	6.0925	1.45006	0.486237	91.9936	0.0157626	133.396
387	5	5.01	25.34	25.34	25.34	sp|Q9NZT1|CALL5_HUMAN	Calmodulin-like protein 5 OS=Homo sapiens GN=CALML5 PE=1 SV=2	HUMAN	4
388	4.99	5.06	11.31	7.407	5.068	tr|B3KUE5|B3KUE5_HUMAN	Phospholipid transfer protein OS=Homo sapiens GN=PLTP PE=2 SV=1	HUMAN	2	1.38206	0.363119	13.978	0.0988743	19.3184	0.818892	0.338784	4.45861	0.183665	3.65112
389	4.97	5.01	7.152	4.727	1.939	sp|Q00839|HNRPU_HUMAN	Heterogeneous nuclear ribonucleoprotein U OS=Homo sapiens GN=HNRNPU PE=1 SV=6	HUMAN	2	1.28306	0.134682	1.44747	0.886415	1.85719	1.4349	0.0766703	1.52597	0.940318	2.18962
390	4.94	5.01	27.72	13.73	10.36	tr|B7ZKW8|B7ZKW8_HUMAN	CapZ-interacting protein OS=Homo sapiens GN=RCSD1 PE=2 SV=1	HUMAN	4	1.15439	0.253377	1.3827	0.834878	1.59618	1.57869	0.0689263	1.68609	0.936304	2.66182
391	4.91	4.97	10.5	7.16	7.16	sp|P16930|FAAA_HUMAN	Fumarylacetoacetase OS=Homo sapiens GN=FAH PE=1 SV=2	HUMAN	3	1.46159	0.327095	15.2029	0.0961389	22.2205	1.38766	0.492693	58.4516	0.0237402	81.1107
392	4.91	4.92	12.85	9.431	4.228	sp|P00748|FA12_HUMAN	Coagulation factor XII OS=Homo sapiens GN=F12 PE=1 SV=3	HUMAN	2	0.361843	0.00783745	1.77122	0.20429	0.640903	0.337207	0.0746907	3.52378	0.0956948	1.18824
393	4.88	4.89	15.32	11.69	11.69	sp|P11226|MBL2_HUMAN	Mannose-binding protein C OS=Homo sapiens GN=MBL2 PE=1 SV=2	HUMAN	3	0.546031	0.282288	38.535	0.0141697	21.0413	0.683834	0.2332	6.37538	0.107262	4.3597
394	4.88	4.88	14.52	9.241	9.241	tr|B7Z5W1|B7Z5W1_HUMAN	Junctional adhesion molecule A OS=Homo sapiens GN=F11R PE=2 SV=1	HUMAN	3	1.0354	0.854453	6.6824	0.154944	6.91895	1.07545	0.845577	41.8961	0.0256695	45.0572
395	4.87	5.9	20.21	20.21	17.73	sp|Q9UBX7|KLK11_HUMAN	Kallikrein-11 OS=Homo sapiens GN=KLK11 PE=1 SV=2	HUMAN	7	3.34267	0.00497581	1.44436	2.31429	4.82801	4.65991	0.0350759	3.57522	1.30339	16.6602
396	4.84	7.9	56.94	38.28	20.57	sp|P26583|HMGB2_HUMAN	High mobility group protein B2 OS=Homo sapiens GN=HMGB2 PE=1 SV=2	HUMAN	4	1.33555	0.19372	1.67331	0.798148	2.23479	1.4919	0.0561104	1.51702	0.983441	2.26324
397	4.84	5.67	31.56	17.78	15.11	sp|P24534|EF1B_HUMAN	Elongation factor 1-beta OS=Homo sapiens GN=EEF1B2 PE=1 SV=3	HUMAN	4	1.29752	0.20578	1.61463	0.803598	2.09501	1.23492	0.0379899	1.21165	1.0192	1.49628
398	4.79	4.91	23.46	18.46	13.85	sp|P00918|CAH2_HUMAN	Carbonic anhydrase 2 OS=Homo sapiens GN=CA2 PE=1 SV=2	HUMAN	3	0.630101	0.135416	3.55193	0.177397	2.23807	0.936642	0.632754	3.58982	0.260916	3.36238
399	4.71	4.71	14.5	6.397	6.397	sp|P27918|PROP_HUMAN	Properdin OS=Homo sapiens GN=CFP PE=1 SV=2	HUMAN	3	0.743104	0.207905	3.58878	0.207063	2.66684	0.724991	0.324691	9.83328	0.0737283	7.12904
400	4.68	4.84	8.602	2.542	2.542	tr|F5H3A1|F5H3A1_HUMAN	Sodium/potassium-transporting ATPase subunit alpha-1 OS=Homo sapiens GN=ATP1A1 PE=3 SV=1	HUMAN	3	0.692118	0.478594	6.24922	0.110753	4.32519	1.48458	0.195507	2.42938	0.611094	3.60662
401	4.68	4.7	35.48	31.45	22.58	tr|F8WEU4|F8WEU4_HUMAN	Cytochrome b5 OS=Homo sapiens GN=CYB5A PE=3 SV=1	HUMAN	3	0.0651264					0.183929
402	4.66	4.75	36.2	22.09	22.09	tr|B4DPJ6|B4DPJ6_HUMAN	Tumor protein D54 OS=Homo sapiens GN=TPD52L2 PE=2 SV=1	HUMAN	3	0.661703	0.628792	11.5739	0.0571721	7.65847	0.698237	0.0328258	1.35493	0.515331	0.946061
403	4.66	4.66	12.45	12.45	7.004	sp|P15328|FOLR1_HUMAN	Folate receptor alpha OS=Homo sapiens GN=FOLR1 PE=1 SV=3	HUMAN	3	2.82319	0.214453	101.317	0.0278648	286.037	2.16968	0.14133	9.22124	0.235292	20.0072
404	4.63	19.02	58.9	51.6	41.55	sp|P10412|H14_HUMAN	Histone H1.4 OS=Homo sapiens GN=HIST1H1E PE=1 SV=2	HUMAN	17	1.453	0.166455	2.12434	0.683976	3.08666	2.22844	0.116428	3.64079	0.612075	8.11328
405	4.62	4.69	14.05	10.13	10.13	sp|Q9H098-2|F107B_HUMAN	Isoform 2 of Protein FAM107B OS=Homo sapiens GN=FAM107B	HUMAN	4	1.44783	0.35627	19.0205	0.0761195	27.5384	2.10823	0.0888447	3.78559	0.55691	7.98092
406	4.62	4.63	12.03	10.6	10.6	sp|P31997|CEAM8_HUMAN	Carcinoembryonic antigen-related cell adhesion molecule 8 OS=Homo sapiens GN=CEACAM8 PE=1 SV=2	HUMAN	4	1.39121	0.285771	7.54416	0.18441	10.4955	1.85723	0.101593	3.54684	0.523631	6.58731
407	4.61	4.74	24.75	9.571	7.591	tr|B4DTC3|B4DTC3_HUMAN	Heterogeneous nuclear ribonucleoprotein D0 OS=Homo sapiens GN=HNRNPD PE=2 SV=1	HUMAN	2	2.35352	0.425481	5359.79	0.000439108	12614.4	1.87433	0.210469	15.4811	0.121072	29.0167
408	4.59	4.63	13.35	8.686	4.237	tr|H3BVD9|H3BVD9_HUMAN	Kunitz-type protease inhibitor 1 (Fragment) OS=Homo sapiens GN=SPINT1 PE=4 SV=1	HUMAN	2	1.08329	0.673877	2.025	0.534955	2.19366	0.862486	0.47466	2.07314	0.416029	1.78805
409	4.57	4.57	12.96	12.96	11.42	sp|P67809|YBOX1_HUMAN	Nuclease-sensitive element-binding protein 1 OS=Homo sapiens GN=YBX1 PE=1 SV=3	HUMAN	4	0.66395	0.591599	1061.12	0.000625707	704.53	1.39262	0.598399	317.781	0.00438232	442.548
410	4.55	5.21	66.36	43.64	33.64	sp|P81605|DCD_HUMAN	Dermcidin OS=Homo sapiens GN=DCD PE=1 SV=2	HUMAN	3	0.42415	0.0760572	3.69937	0.114655	1.56909	0.43214	0.0777558	3.70084	0.116768	1.59928
411	4.54	4.82	14.83	7.815	7.337	tr|B4DGP8|B4DGP8_HUMAN	Calnexin OS=Homo sapiens GN=CANX PE=2 SV=1	HUMAN	4	1.74934	0.304261	5.79358	0.301944	10.1349	3.90183	0.0812347	5.9302	0.65796	23.1387
412	4.53	6.66	82.54	73.02	60.32	tr|C9J0E4|C9J0E4_HUMAN	Cystatin-A OS=Homo sapiens GN=CSTA PE=4 SV=1	HUMAN	4	1.92887	0.0475889	1.89596	1.01736	3.65705	0.960227	0.798135	1.82056	0.527434	1.74815
413	4.49	4.7	25.85	17.35	8.503	sp|P06748|NPM_HUMAN	Nucleophosmin OS=Homo sapiens GN=NPM1 PE=1 SV=2	HUMAN	5	1.15076	0.247635	1.45367	0.791622	1.67282	1.26628	0.209579	1.74488	0.72571	2.2095
414	4.47	4.51	33.33	25	19.44	sp|P62942|FKB1A_HUMAN	Peptidyl-prolyl cis-trans isomerase FKBP1A OS=Homo sapiens GN=FKBP1A PE=1 SV=2	HUMAN	2	1.55305	0.438506	100.007	0.0155295	155.315	1.44445	0.283235	9.27881	0.155672	13.4028
415	4.46	4.46	20.47	17.21	17.21	tr|C9JF17|C9JF17_HUMAN	Apolipoprotein D (Fragment) OS=Homo sapiens GN=APOD PE=4 SV=1	HUMAN	3	0.262104	0.047228	3.54125	0.0740145	0.928175	0.391148	0.0997135	6.57654	0.0594762	2.5724
417	4.4	4.51	35.84	19.65	15.03	tr|J3KNB4|J3KNB4_HUMAN	Antibacterial protein LL-37 OS=Homo sapiens GN=CAMP PE=4 SV=1	HUMAN	3	1.11904	0.693909	2.28299	0.490164	2.55475	1.48494	0.157524	1.95639	0.759023	2.90512
418	4.38	4.41	35.08	18.85	18.85	sp|P60953|CDC42_HUMAN	Cell division control protein 42 homolog OS=Homo sapiens GN=CDC42 PE=1 SV=2	HUMAN	4	1.55118	0.260794	3.37706	0.459327	5.23842	3.38054	0.201465	16.3416	0.206867	55.2436
419	4.34	4.38	13.81	5.959	4.07	sp|P09871|C1S_HUMAN	Complement C1s subcomponent OS=Homo sapiens GN=C1S PE=1 SV=1	HUMAN	3	0.771051	0.0665708	1.33428	0.57788	1.02879	0.823104	0.596788	2.56437	0.320977	2.11074
420	4.3	6.62	34.38	25.35	11.46	sp|P27105|STOM_HUMAN	Erythrocyte band 7 integral membrane protein OS=Homo sapiens GN=STOM PE=1 SV=3	HUMAN	5	1.07243	0.874787	86.3825	0.0124149	92.6389	2.04261	0.407893	868.556	0.00235173	1774.12
421	4.28	4.3	29.13	23.48	16.09	sp|P15941-6|MUC1_HUMAN	Isoform 6 of Mucin-1 OS=Homo sapiens GN=MUC1	HUMAN	3	1.38007	0.411856	2.93905	0.469564	4.05609	1.59508	0.301151	3.29451	0.484162	5.25501
422	4.26	12.18	39.9	32.32	27.27	sp|P32119|PRDX2_HUMAN	Peroxiredoxin-2 OS=Homo sapiens GN=PRDX2 PE=1 SV=5	HUMAN	9	0.666787	0.0120966	1.26664	0.526423	0.844577	0.577017	0.218842	3.09136	0.186655	1.78377
423	4.26	4.38	6.846	2.2	1.32	sp|O00468|AGRIN_HUMAN	Agrin OS=Homo sapiens GN=AGRN PE=1 SV=4	HUMAN	2	0.72259	0.474503	4.95594	0.145803	3.58111	0.483197	0.230152	6.26308	0.0771501	3.0263
424	4.24	4.33	26.84	15.81	13.6	tr|F2Z2Y4|F2Z2Y4_HUMAN	Pyridoxal kinase OS=Homo sapiens GN=PDXK PE=4 SV=1	HUMAN	3	1.61936	0.16408	2.61952	0.61819	4.24195	0.94048	0.808261	2.60054	0.361648	2.44576
425	4.22	4.5	8.637	1.601	0.7763	sp|Q9NZM1|MYOF_HUMAN	Myoferlin OS=Homo sapiens GN=MYOF PE=1 SV=1	HUMAN	2	1.25174	0.407327	2.53063	0.494639	3.1677	1.29921	0.088254	1.43163	0.907508	1.85999
426	4.22	4.24	24.39	16.59	12.2	sp|Q9Y5Z4|HEBP2_HUMAN	Heme-binding protein 2 OS=Homo sapiens GN=HEBP2 PE=1 SV=1	HUMAN	2	1.1222	0.145745	1.19424	0.939673	1.34017	1.00961	0.914246	1.26046	0.800981	1.27257
427	4.16	8.49	17.42	6.452	4.355	tr|J9JID7|J9JID7_HUMAN	Lamin B2, isoform CRA_a OS=Homo sapiens GN=LMNB2 PE=3 SV=1	HUMAN	5	1.48498	0.381166	4.60502	0.32247	6.83838	1.20747	0.155335	1.4384	0.839455	1.73682
428	4.16	4.47	11.37	4.102	2.797	sp|P11047|LAMC1_HUMAN	Laminin subunit gamma-1 OS=Homo sapiens GN=LAMC1 PE=1 SV=3	HUMAN	3	0.91853	0.561738	3.71542	0.247221	3.41272	0.574933	0.116169	3.66112	0.157038	2.1049
429	4.16	4.34	25	17.34	12.5	sp|O14818|PSA7_HUMAN	Proteasome subunit alpha type-7 OS=Homo sapiens GN=PSMA7 PE=1 SV=1	HUMAN	3	0.770736	0.392606	10.4409	0.0738186	8.04721	1.48616	0.402545	39.9772	0.0371753	59.4125
431	4.15	5.73	18.16	10.67	5.243	tr|F5H5M6|F5H5M6_HUMAN	Hyaluronan-binding protein 2 OS=Homo sapiens GN=HABP2 PE=3 SV=1	HUMAN	3	0.417076	0.000141607	1.24133	0.33599	0.517731	0.35889	0.0308018	2.42083	0.148251	0.868812
432	4.15	4.22	28.83	24.77	10.36	sp|P04179|SODM_HUMAN	Superoxide dismutase [Mn], mitochondrial OS=Homo sapiens GN=SOD2 PE=1 SV=2	HUMAN	2	0.631552	0.160491	2.47201	0.255481	1.5612	1.04463	0.872673	2.81479	0.371121	2.94041
433	4.14	4.16	15.46	12.3	10.41	sp|P12318|FCG2A_HUMAN	Low affinity immunoglobulin gamma Fc region receptor II-a OS=Homo sapiens GN=FCGR2A PE=1 SV=4	HUMAN	3	1.3947					0.946737
434	4.12	4.29	8.975	3.291	2.319	sp|Q12913|PTPRJ_HUMAN	Receptor-type tyrosine-protein phosphatase eta OS=Homo sapiens GN=PTPRJ PE=1 SV=3	HUMAN	2	0.524151					0.929605
435	4.12	4.24	33.78	23.65	14.86	sp|O60869|EDF1_HUMAN	Endothelial differentiation-related factor 1 OS=Homo sapiens GN=EDF1 PE=1 SV=1	HUMAN	2	1.31954	0.0851318	1.45113	0.909323	1.91482	1.17805	0.343766	1.77407	0.664039	2.08994
436	4.12	4.12	15.83	13.75	11.25	sp|P08294|SODE_HUMAN	Extracellular superoxide dismutase [Cu-Zn] OS=Homo sapiens GN=SOD3 PE=1 SV=2	HUMAN	2	0.640876	0.580525	1480.94	0.000432748	949.101	0.578914	0.334809	56.3316	0.0102769	32.6112
438	4.11	4.12	19.7	7.955	7.955	sp|P61247|RS3A_HUMAN	40S ribosomal protein S3a OS=Homo sapiens GN=RPS3A PE=1 SV=2	HUMAN	2	1.14024	0.632327	2.74567	0.415288	3.13074	2.09579	0.0959606	2.89938	0.722841	6.07648
439	4.1	10.8	84.09	84.09	77.27	sp|P63313|TYB10_HUMAN	Thymosin beta-10 OS=Homo sapiens GN=TMSB10 PE=1 SV=2	HUMAN	16	3.15851	0.229818	248.909	0.0126894	786.182	5.54268	0.180754	572.177	0.009687	3171.39
440	4.09	6.17	67.86	41.67	34.52	tr|E9PS38|E9PS38_HUMAN	Protein NEDD8-MDP1 OS=Homo sapiens GN=NEDD8-MDP1 PE=4 SV=1	HUMAN	4	1.77273	0.109605	3.5429	0.50036	6.28061	1.08663	0.779193	18.5538	0.0585668	20.1612
441	4.09	4.25	19.06	12.23	11.87	sp|Q9BT09|CNPY3_HUMAN	Protein canopy homolog 3 OS=Homo sapiens GN=CNPY3 PE=1 SV=1	HUMAN	3	1.14402	0.423694	3.82673	0.298954	4.37784	2.24617	0.480249	15725.7	0.000142835	35322.5
442	4.09	4.1	25.41	12.3	12.3	sp|Q15848|ADIPO_HUMAN	Adiponectin OS=Homo sapiens GN=ADIPOQ PE=1 SV=1	HUMAN	2	0.251529					0.286732
443	4.08	4.27	10.24	4.654	4.654	sp|P15144|AMPN_HUMAN	Aminopeptidase N OS=Homo sapiens GN=ANPEP PE=1 SV=4	HUMAN	3	0.358687	0.479333	200386	1.78999e-06	71875.8	0.318466	0.42863	108708	2.92956e-06	34619.6
444	4.08	4.14	14.47	8.421	6.316	tr|E9PF24|E9PF24_HUMAN	Apolipoprotein L1 OS=Homo sapiens GN=APOL1 PE=4 SV=1	HUMAN	3	0.712366					0.347531
445	4.07	4.29	19.16	7.612	7.612	sp|P49908|SEPP1_HUMAN	Selenoprotein P OS=Homo sapiens GN=SEPP1 PE=1 SV=3	HUMAN	3	0.368955	0.0236008	1.9563	0.188598	0.721789	0.257876	0.00423267	1.46319	0.176243	0.377321
446	4.07	4.21	24.07	7.944	6.542	tr|Q5T6W5|Q5T6W5_HUMAN	Heterogeneous nuclear ribonucleoprotein K OS=Homo sapiens GN=HNRNPK PE=2 SV=1	HUMAN	3	1.8024	0.118279	4.08346	0.44139	7.36	1.13823	0.743017	47.0707	0.0241813	53.5774
447	4.07	4.19	20.13	7.468	4.87	tr|E7EX17|E7EX17_HUMAN	Uncharacterized protein OS=Homo sapiens GN=EIF4B PE=4 SV=1	HUMAN	2	0.977933	0.816277	1.43801	0.680059	1.40628	1.18623	0.789712	11.1984	0.105928	13.2839
448	4.07	4.17	22.08	7.421	7.421	tr|F5H0W4|F5H0W4_HUMAN	Bridging integrator 2 OS=Homo sapiens GN=BIN2 PE=4 SV=1	HUMAN	3	2.01075					3.9315
449	4.07	4.16	21.62	10.04	10.04	tr|J3KN86|J3KN86_HUMAN	40S ribosomal protein S3 OS=Homo sapiens GN=RPS3 PE=3 SV=1	HUMAN	2	2.2695	0.228685	7.82756	0.289937	17.7647	1.14116	0.791148	6.56183	0.173908	7.48809
450	4.07	4.14	29.8	16.56	12.58	tr|B1AKZ3|B1AKZ3_HUMAN	Astrocytic phosphoprotein PEA-15 OS=Homo sapiens GN=PEA15 PE=2 SV=1	HUMAN	3	1.12967	0.634297	2.08615	0.541509	2.35667	1.19344	0.591274	2.55769	0.466609	3.05245
452	4.06	4.15	22.1	10.72	7.877	sp|Q13451|FKBP5_HUMAN	Peptidyl-prolyl cis-trans isomerase FKBP5 OS=Homo sapiens GN=FKBP5 PE=1 SV=2	HUMAN	2	0.61528	0.154342	4.60031	0.133747	2.83048	1.04363	0.742029	3.54294	0.294566	3.69752
453	4.06	4.15	22.52	11.26	8.559	sp|O43633|CHM2A_HUMAN	Charged multivesicular body protein 2a OS=Homo sapiens GN=CHMP2A PE=1 SV=1	HUMAN	2	0.839381					1.72462
454	4.05	4.22	7.35	2.227	2.227	tr|G5E9M5|G5E9M5_HUMAN	Interleukin enhancer binding factor 3, 90kDa, isoform CRA_b OS=Homo sapiens GN=ILF3 PE=4 SV=1	HUMAN	2	1.24896	0.519819	20.2111	0.0617956	25.2428	1.17997	0.342981	3.51426	0.335765	4.14671
455	4.05	4.06	11.97	5.882	4.462	sp|Q12805|FBLN3_HUMAN	EGF-containing fibulin-like extracellular matrix protein 1 OS=Homo sapiens GN=EFEMP1 PE=1 SV=2	HUMAN	2	1.06457	0.728352	1.963	0.542318	2.08974	0.611849	0.698525	113.016	0.00541383	69.1488
456	4.05	4.06	6.977	4.07	4.07	tr|F5H3W1|F5H3W1_HUMAN	Podocalyxin OS=Homo sapiens GN=PODXL PE=4 SV=1	HUMAN	2	1.91561	0.0811329	2.33802	0.819332	4.47874	1.97135	0.165012	3.89989	0.505489	7.68805
457	4.04	4.33	8.71	2.743	1.444	tr|E9PAV3|E9PAV3_HUMAN	Nascent polypeptide-associated complex subunit alpha OS=Homo sapiens GN=NACA PE=4 SV=1	HUMAN	2	0.784426					0.975761
458	4.04	4.05	8.176	5.031	5.031	sp|P27695|APEX1_HUMAN	DNA-(apurinic or apyrimidinic site) lyase OS=Homo sapiens GN=APEX1 PE=1 SV=2	HUMAN	2	0.594247					1.15934
459	4.04	4.04	9.355	9.355	9.355	sp|P18827|SDC1_HUMAN	Syndecan-1 OS=Homo sapiens GN=SDC1 PE=1 SV=3	HUMAN	3	1.39315					0.822026
460	4.03	4.13	8.342	2.925	1.625	sp|O14786|NRP1_HUMAN	Neuropilin-1 OS=Homo sapiens GN=NRP1 PE=1 SV=3	HUMAN	2	0.867326	0.553072	2.37949	0.3645	2.0638	0.427794	0.0632738	2.62612	0.1629	1.12344
461	4.03	4.1	17.65	7.721	7.721	sp|P24593|IBP5_HUMAN	Insulin-like growth factor-binding protein 5 OS=Homo sapiens GN=IGFBP5 PE=1 SV=1	HUMAN	3	1.12892	0.715856	3.47286	0.325069	3.92058	1.71255	0.334697	6.27685	0.272836	10.7494
462	4.02	9.62	18.96	9.514	5.466	sp|P20742|PZP_HUMAN	Pregnancy zone protein OS=Homo sapiens GN=PZP PE=1 SV=4	HUMAN	7	0.503081	0.46744	27.7196	0.018149	13.9452	0.800922	0.778122	19.46	0.0411572	15.586
464	4.02	4.4	12.23	7.524	2.351	tr|F8W8S0|F8W8S0_HUMAN	Cytoplasmic dynein 1 intermediate chain 2 OS=Homo sapiens GN=DYNC1I2 PE=4 SV=1	HUMAN	2	1.02988	0.921785	20.69	0.0497767	21.3083	1.19747	0.693218	79.6718	0.01503	95.4043
465	4.02	4.17	18.91	16.81	10.5	tr|F5GX11|F5GX11_HUMAN	Proteasome subunit alpha type-1 OS=Homo sapiens GN=PSMA1 PE=4 SV=1	HUMAN	2	1.15266	0.398625	3.68993	0.31238	4.25325	1.9789	0.298075	80.3032	0.0246428	158.912
466	4.02	4.1	19.06	10.25	5.123	tr|B5MCQ5|B5MCQ5_HUMAN	Protein disulfide-isomerase A6 OS=Homo sapiens GN=PDIA6 PE=3 SV=1	HUMAN	2	1.29167	0.539254	39.6412	0.032584	51.2033	1.27852	0.379965	8.34268	0.15325	10.6663
467	4.01	5.21	19.35	9.677	9.677	sp|P09496|CLCA_HUMAN	Clathrin light chain A OS=Homo sapiens GN=CLTA PE=1 SV=1	HUMAN	4	0.862741	0.485846	6.0153	0.143425	5.18964	1.06746	0.673511	4.36286	0.244671	4.65719
468	4.01	4.27	21.26	6.934	3.236	sp|A0MZ66-3|SHOT1_HUMAN	Isoform 3 of Shootin-1 OS=Homo sapiens GN=KIAA1598	HUMAN	2	1.16366	0.146659	1.28103	0.908372	1.49068	1.2014	0.2286	1.47271	0.815779	1.76931
469	4.01	4.1	23.69	12.05	12.05	sp|Q06323|PSME1_HUMAN	Proteasome activator complex subunit 1 OS=Homo sapiens GN=PSME1 PE=1 SV=1	HUMAN	6	1.10146	0.845781	143.881	0.00765532	158.479	1.47848	0.658751	4287.31	0.000344851	6338.73
470	4.01	4.07	29.41	29.41	23.53	sp|P20962|PTMS_HUMAN	Parathymosin OS=Homo sapiens GN=PTMS PE=1 SV=2	HUMAN	2	0.759714	0.261547	4.5773	0.165974	3.47744	1.10598	0.557962	4.65092	0.237798	5.14381
471	4	51.66	39.36	36.17	32.58	sp|P06681|CO2_HUMAN	Complement C2 OS=Homo sapiens GN=C2 PE=1 SV=2	HUMAN	28
473	4	4.2	8.175	2.912	2.24	sp|Q14764|MVP_HUMAN	Major vault protein OS=Homo sapiens GN=MVP PE=1 SV=4	HUMAN	2	1.38341	0.509699	70.2006	0.0197065	97.1162	1.73639	0.122875	3.93658	0.44109	6.83544
474	4	4.13	15.67	8.955	8.955	tr|Q5VXV2|Q5VXV2_HUMAN	Protein SET OS=Homo sapiens GN=SET PE=2 SV=2	HUMAN	2	1.0332	0.801963	3.63596	0.284163	3.75669	0.739337	0.202446	3.53642	0.209064	2.6146
475	4	4.08	12.39	7.606	7.606	tr|B7Z1Z5|B7Z1Z5_HUMAN	Neurotrimin OS=Homo sapiens GN=NTM PE=2 SV=1	HUMAN	2	1.5243	0.743325	283938	5.36842e-06	432805	0.976506	0.869069	4.25468	0.229513	4.15472
476	4	4.06	14.12	4.706	4.706	sp|P29350|PTN6_HUMAN	Tyrosine-protein phosphatase non-receptor type 6 OS=Homo sapiens GN=PTPN6 PE=1 SV=1	HUMAN	2	0.779165	0.804817	22364	3.48401e-05	17425.2	1.91395	0.455373	1294.69	0.00147831	2477.98
477	4	4.06	8.205	1.624	1.624	sp|P07996|TSP1_HUMAN	Thrombospondin-1 OS=Homo sapiens GN=THBS1 PE=1 SV=2	HUMAN	2	0.631113					0.538029
478	4	4.02	7.377	4.098	4.098	sp|P00742|FA10_HUMAN	Coagulation factor X OS=Homo sapiens GN=F10 PE=1 SV=2	HUMAN	2	0.294665					0.405326
480	4	4.02	21.69	16.87	16.87	sp|P48304|REG1B_HUMAN	Lithostathine-1-beta OS=Homo sapiens GN=REG1B PE=1 SV=1	HUMAN	3	0.100585					0.558038
481	4	4.01	15.31	9.524	9.524	sp|P49788|TIG1_HUMAN	Retinoic acid receptor responder protein 1 OS=Homo sapiens GN=RARRES1 PE=2 SV=2	HUMAN	2	0.839134					1.01054
482	4	4.01	36.14	31.33	31.33	sp|P02654|APOC1_HUMAN	Apolipoprotein C-I OS=Homo sapiens GN=APOC1 PE=1 SV=1	HUMAN	3	0.385743					0.430995
483	4	4	4.601	3.221	3.221	sp|Q9NPY3|C1QR1_HUMAN	Complement component C1q receptor OS=Homo sapiens GN=CD93 PE=1 SV=3	HUMAN	2	0.397624	0.422844	9639.3	4.12503e-05	3832.82	0.241234	0.207443	448.099	0.000538349	108.097
484	4	4	16.52	13.84	13.84	sp|Q96BQ1|FAM3D_HUMAN	Protein FAM3D OS=Homo sapiens GN=FAM3D PE=1 SV=1	HUMAN	2	1.04905	0.719462	3.63335	0.288728	3.81157	2.68519	0.0651298	3.62724	0.740285	9.73984
485	4	4	25	25	25	sp|P04155|TFF1_HUMAN	Trefoil factor 1 OS=Homo sapiens GN=TFF1 PE=1 SV=1	HUMAN	2	2.00695					0.616972
486	4	4	6.593	6.593	6.593	tr|F6SYF8|F6SYF8_HUMAN	Dickkopf-related protein 3 OS=Homo sapiens GN=DKK3 PE=4 SV=1	HUMAN	3	0.950336	0.773968	5.73001	0.165852	5.44543	0.420529	0.155616	15.5697	0.0270094	6.54753
487	3.98	4.02	10.64	5.201	4.019	sp|Q96IY4|CBPB2_HUMAN	Carboxypeptidase B2 OS=Homo sapiens GN=CPB2 PE=1 SV=2	HUMAN	2	0.758946	0.223101	3.60045	0.210792	2.73254	0.577667	0.24713	17.3111	0.0333697	10.0001
488	3.97	14.9	39.27	29.15	22.67	sp|P61981|1433G_HUMAN	14-3-3 protein gamma OS=Homo sapiens GN=YWHAG PE=1 SV=2	HUMAN	12	1.61301	0.382332	64.1375	0.0251492	103.455	1.15564	0.620704	15.0435	0.0768196	17.3849
490	3.95	3.98	17.61	10.38	6.604	tr|G5EA09|G5EA09_HUMAN	Syndecan binding protein (Syntenin), isoform CRA_a OS=Homo sapiens GN=SDCBP PE=4 SV=1	HUMAN	2	1.15116	0.362797	1.67877	0.685719	1.93254	0.639597	0.0347578	1.44513	0.442588	0.924299
491	3.92	3.93	7.848	5.157	3.812	tr|H0Y8K2|H0Y8K2_HUMAN	Uncharacterized protein (Fragment) OS=Homo sapiens PE=3 SV=1	HUMAN	2	0.796719					0.873882
492	3.91	3.98	6.463	5.102	2.608	sp|P12830|CADH1_HUMAN	Cadherin-1 OS=Homo sapiens GN=CDH1 PE=1 SV=3	HUMAN	2	1.20809	0.0868227	1.27063	0.950783	1.53504	0.794301	0.248146	1.66953	0.475765	1.32611
493	3.9	4.21	8.609	2.202	1.702	sp|Q12866|MERTK_HUMAN	Tyrosine-protein kinase Mer OS=Homo sapiens GN=MERTK PE=1 SV=2	HUMAN	2	1.18886					0.633813
494	3.89	3.91	19.35	9.946	9.946	tr|J3QK90|J3QK90_HUMAN	NSFL1 cofactor p47 OS=Homo sapiens GN=NSFL1C PE=4 SV=1	HUMAN	3	0.684537	0.165163	2.13921	0.319995	1.46437	0.753725	0.0729429	1.41609	0.532256	1.06734
495	3.89	3.91	9.028	5.093	5.093	tr|I3NI00|I3NI00_HUMAN	Basigin OS=Homo sapiens GN=BSG PE=4 SV=1	HUMAN	2	1.01152					1.44223
497	3.82	4.29	10.67	5.618	3.184	sp|Q9H4M9|EHD1_HUMAN	EH domain-containing protein 1 OS=Homo sapiens GN=EHD1 PE=1 SV=2	HUMAN	2	1.89401	0.198893	13.7523	0.137722	26.047	1.92247	0.291115	59.5331	0.0322926	114.451
499	3.75	4.83	25.94	21.7	13.21	tr|E7EWS7|E7EWS7_HUMAN	Ubiquitin-conjugating enzyme E2 L3 OS=Homo sapiens GN=UBE2L3 PE=3 SV=1	HUMAN	3	1.86643	0.102117	2.53691	0.73571	4.73497	1.97501	0.0649204	2.19222	0.900917	4.32966
500	3.71	3.82	8.991	4.404	4.404	sp|P22792|CPN2_HUMAN	Carboxypeptidase N subunit 2 OS=Homo sapiens GN=CPN2 PE=1 SV=3	HUMAN	2	0.591662	0.201053	8.83643	0.0669572	5.22818	0.366166	0.0624802	3.51441	0.10419	1.28686
501	3.7	3.72	9.517	6.042	3.021	tr|D6RAR4|D6RAR4_HUMAN	Hepatocyte growth factor activator short chain OS=Homo sapiens GN=HGFAC PE=3 SV=1	HUMAN	2	0.330283	0.0906189	7.51756	0.0439349	2.48292	0.530448	0.452094	1018.87	0.000520622	540.459
502	3.67	3.69	17.82	5.116	5.116	sp|O75083|WDR1_HUMAN	WD repeat-containing protein 1 OS=Homo sapiens GN=WDR1 PE=1 SV=4	HUMAN	3	1	1	98.0196	0.010202	98.0196	1.00731	0.972188	8.30514	0.121288	8.36585
503	3.64	3.66	9.389	3.712	3.712	sp|P15169|CBPN_HUMAN	Carboxypeptidase N catalytic chain OS=Homo sapiens GN=CPN1 PE=1 SV=1	HUMAN	2	0.712712	0.319544	10.6091	0.0671791	7.56126	0.871719	0.409896	3.70349	0.235378	3.2284
504	3.6	3.67	21.63	13.94	11.06	tr|F5H7H0|F5H7H0_HUMAN	Glutathione S-transferase omega-1 OS=Homo sapiens GN=GSTO1 PE=3 SV=1	HUMAN	2	0.708075	0.599361	413.366	0.00171295	292.694	0.916297	0.7778	21.1556	0.0433122	19.3849
505	3.55	3.66	8.38	4.469	4.469	sp|P55259|GP2_HUMAN	Pancreatic secretory granule membrane major glycoprotein GP2 OS=Homo sapiens GN=GP2 PE=2 SV=3	HUMAN	2	6.43189					7.13297
506	3.54	3.54	18.46	11.07	5.705	sp|Q9HC38-2|GLOD4_HUMAN	Isoform 2 of Glyoxalase domain-containing protein 4 OS=Homo sapiens GN=GLOD4	HUMAN	2	1.55279	0.0589622	1.59476	0.973682	2.47632	1.34648	0.297111	1.99264	0.675728	2.68306
507	3.52	3.64	22.31	22.31	18.46	tr|J3QL05|J3QL05_HUMAN	Serine/arginine-rich-splicing factor 2 (Fragment) OS=Homo sapiens GN=SRSF2 PE=4 SV=1	HUMAN	2	1.23976					1.71627
508	3.5	4.64	40.24	28.99	24.85	tr|E9PLD0|E9PLD0_HUMAN	Ras-related protein Rab-1B OS=Homo sapiens GN=RAB1B PE=3 SV=1	HUMAN	4	1.15301	0.768866	116.943	0.00985958	134.836	1.57407	0.388943	56.6519	0.027785	89.1741
509	3.49	3.49	11.36	9.416	9.416	tr|H7BY36|H7BY36_HUMAN	RNA-binding protein EWS (Fragment) OS=Homo sapiens GN=EWSR1 PE=4 SV=1	HUMAN	3	1.3684	0.197827	3.59601	0.380533	4.92078	1.14531	0.671365	20.8512	0.0549279	23.8811
510	3.46	4.24	15.66	6.977	4.806	sp|P13667|PDIA4_HUMAN	Protein disulfide-isomerase A4 OS=Homo sapiens GN=PDIA4 PE=1 SV=2	HUMAN	5	0.564315	0.0202272	1.42698	0.395462	0.805265	0.670032	0.134995	2.02738	0.330491	1.35841
511	3.45	3.88	6.789	3.112	2.263	sp|P23246|SFPQ_HUMAN	Splicing factor, proline- and glutamine-rich OS=Homo sapiens GN=SFPQ PE=1 SV=2	HUMAN	3	1.30812	0.313145	6.22497	0.21014	8.14299	1.81061	0.363796	127.782	0.0141696	231.363
512	3.42	3.51	28.13	14.29	8.929	sp|Q00688|FKBP3_HUMAN	Peptidyl-prolyl cis-trans isomerase FKBP3 OS=Homo sapiens GN=FKBP3 PE=1 SV=1	HUMAN	2	1.39502	0.0220271	1.27359	1.09534	1.77669	1.27119	0.235035	1.67418	0.75929	2.1282
513	3.37	3.42	8.624	4.037	4.037	tr|A6NHF2|A6NHF2_HUMAN	Biotinidase OS=Homo sapiens GN=BTD PE=2 SV=3	HUMAN	2	0.729317	0.193694	3.52312	0.207009	2.56947	0.65364	0.526776	356.841	0.00183174	233.245
514	3.35	4.35	11.24	5.473	3.846	sp|P07225|PROS_HUMAN	Vitamin K-dependent protein S OS=Homo sapiens GN=PROS1 PE=1 SV=1	HUMAN	3	0.544614	0.183426	9.8584	0.0552437	5.36903	0.390156	0.157633	20.557	0.0189793	8.02043
515	3.35	3.39	20.69	7.28	7.28	sp|P30040|ERP29_HUMAN	Endoplasmic reticulum resident protein 29 OS=Homo sapiens GN=ERP29 PE=1 SV=4	HUMAN	2	0.75404	0.416706	15.6861	0.0480705	11.828	0.959158	0.824765	6.52732	0.146945	6.26073
516	3.33	3.33	5.516	4.077	4.077	sp|P11279|LAMP1_HUMAN	Lysosome-associated membrane glycoprotein 1 OS=Homo sapiens GN=LAMP1 PE=1 SV=3	HUMAN	2	0.632953	0.136028	3.52875	0.17937	2.23354	0.965454	0.78395	3.54426	0.272399	3.42182
517	3.31	3.39	17.46	6.805	3.846	tr|I3L080|I3L080_HUMAN	Hepatoma-derived growth factor-related protein 2 OS=Homo sapiens GN=HDGFRP2 PE=4 SV=1	HUMAN	2	0.892168	0.679772	13.9416	0.0639934	12.4382	1.41338	0.241417	5.7652	0.245156	8.1484
518	3.3	3.3	6.209	5.68	4.227	sp|Q9HCU0|CD248_HUMAN	Endosialin OS=Homo sapiens GN=CD248 PE=1 SV=1	HUMAN	4	1.3824	0.351041	3.17437	0.435486	4.38824	1.43657	0.186256	2.19742	0.653753	3.15676
519	3.29	3.57	10.77	2.591	1.943	sp|Q9H2G2|SLK_HUMAN	STE20-like serine/threonine-protein kinase OS=Homo sapiens GN=SLK PE=1 SV=1	HUMAN	2	1.09592	0.910719	3804.75	0.00028804	4169.7	1.50124	0.402941	44.1333	0.0340161	66.2546
521	3.27	3.29	23.16	23.16	23.16	sp|Q6EEV6|SUMO4_HUMAN	Small ubiquitin-related modifier 4 OS=Homo sapiens GN=SUMO4 PE=1 SV=2	HUMAN	2	0.918944					2.58573
522	3.24	3.35	44.44	28.4	28.4	tr|H0Y614|H0Y614_HUMAN	Ubiquitin-fold modifier 1 (Fragment) OS=Homo sapiens GN=UFM1 PE=4 SV=1	HUMAN	2	1.34433	0.305286	7.06499	0.190281	9.49771	0.63737	0.146384	3.81754	0.166958	2.43318
523	3.23	4.15	8.633	6.715	6.715	sp|P15151|PVR_HUMAN	Poliovirus receptor OS=Homo sapiens GN=PVR PE=1 SV=2	HUMAN	3	0.822081	0.299769	3.55099	0.231508	2.9192	0.475383	0.0843377	3.52225	0.134966	1.67442
524	3.19	3.26	53.15	19.82	19.82	tr|J3KT38|J3KT38_HUMAN	Growth factor receptor-bound protein 2 (Fragment) OS=Homo sapiens GN=GRB2 PE=4 SV=1	HUMAN	2	0.820935	0.306628	3.70787	0.221403	3.04392	1.41466	0.184093	3.71103	0.381204	5.24985
525	3.16	3.43	12.26	6.065	2.695	sp|Q5KU26|COL12_HUMAN	Collectin-12 OS=Homo sapiens GN=COLEC12 PE=1 SV=3	HUMAN	3	1.11037	0.481784	3.51214	0.316153	3.89978	0.635345	0.136635	3.51238	0.180887	2.23157
526	3.16	3.17	32.39	18.31	9.859	sp|Q05315|LPPL_HUMAN	Eosinophil lysophospholipase OS=Homo sapiens GN=CLC PE=1 SV=3	HUMAN	2	5.78986	0.0422088	4.97137	1.16464	28.7835	2.78672	0.0344299	2.31669	1.20289	6.45597
527	3.13	3.32	12.91	4.044	4.044	sp|Q14677-3|EPN4_HUMAN	Isoform 3 of Clathrin interactor 1 OS=Homo sapiens GN=CLINT1	HUMAN	2	1.11241	0.325128	1.42537	0.780438	1.5856	1.22405	0.461308	2.61705	0.467721	3.20341
528	3.11	5.51	11.21	3.115	2.181	sp|P33176|KINH_HUMAN	Kinesin-1 heavy chain OS=Homo sapiens GN=KIF5B PE=1 SV=1	HUMAN	4	2.24674					2.10264
529	3.07	3.09	18.75	10.53	10.53	sp|P46108|CRK_HUMAN	Adapter molecule crk OS=Homo sapiens GN=CRK PE=1 SV=2	HUMAN	2	0.536289	0.420777	471.751	0.00113681	252.995	0.803703	0.779361	2182.1	0.000368316	1753.76
530	3.01	3.06	22.22	13.33	13.33	sp|P09382|LEG1_HUMAN	Galectin-1 OS=Homo sapiens GN=LGALS1 PE=1 SV=2	HUMAN	2	1.57014					1.70465
531	3	6.04	24.65	11.39	6.708	tr|E9PGK1|E9PGK1_HUMAN	Annexin OS=Homo sapiens GN=ANXA6 PE=3 SV=1	HUMAN	6	0.806033	0.398674	2.01171	0.40067	1.62151	1.1202	0.692098	2.2883	0.489534	2.56337
532	3	3	24.71	18.82	18.82	tr|F8VV13|F8VV13_HUMAN	Mucin-like protein 1 OS=Homo sapiens GN=MUCL1 PE=4 SV=1	HUMAN	2	0.493433					0.57758
533	2.97	2.98	9.913	5.831	5.831	sp|Q16651|PRSS8_HUMAN	Prostasin OS=Homo sapiens GN=PRSS8 PE=1 SV=1	HUMAN	2	1.48322	0.156948	3.52716	0.420514	5.23154	1.27572	0.24658	3.53311	0.361077	4.50727
535	2.96	3.05	13.67	7.239	4.021	sp|P15104|GLNA_HUMAN	Glutamine synthetase OS=Homo sapiens GN=GLUL PE=1 SV=4	HUMAN	2	1.64018					0.950723
536	2.93	3.14	25	12.14	8.571	sp|O43768-4|ENSA_HUMAN	Isoform 4 of Alpha-endosulfine OS=Homo sapiens GN=ENSA	HUMAN	2	1.28772	0.0952164	1.43642	0.896479	1.8497	1.35928	0.387381	3.33671	0.407373	4.53553
537	2.93	2.96	16.1	8.359	2.167	sp|P52895|AK1C2_HUMAN	Aldo-keto reductase family 1 member C2 OS=Homo sapiens GN=AKR1C2 PE=1 SV=3	HUMAN	1	2.00348	0.0377615	1.8187	1.1016	3.64373	0.621472	0.0311067	1.44726	0.429412	0.899433
538	2.92	2.92	24.62	24.62	24.62	tr|F5H0D7|F5H0D7_HUMAN	Proline-rich protein 4 OS=Homo sapiens GN=PRR4 PE=4 SV=1	HUMAN	3	2.08193					23.2246
539	2.88	3.15	19.5	3.312	1.84	sp|Q9Y2J2|E41L3_HUMAN	Band 4.1-like protein 3 OS=Homo sapiens GN=EPB41L3 PE=1 SV=2	HUMAN	2	0.844837	0.351567	3.74385	0.22566	3.16295	0.743805	0.215805	3.76594	0.197508	2.80113
540	2.81	6.95	30.61	22.12	16.97	sp|Q02985|FHR3_HUMAN	Complement factor H-related protein 3 OS=Homo sapiens GN=CFHR3 PE=1 SV=2	HUMAN	6	0.858068					1.62155
541	2.79	2.82	8.293	5.104	2.552	tr|F5H6P0|F5H6P0_HUMAN	Protein-glutamine gamma-glutamyltransferase 2 OS=Homo sapiens GN=TGM2 PE=3 SV=1	HUMAN	2	1.96155	0.239783	29.546	0.0663896	57.956	1.86886	0.0998803	3.51452	0.531755	6.56815
542	2.77	2.98	40.6	23.31	14.29	sp|P05413|FABPH_HUMAN	Fatty acid-binding protein, heart OS=Homo sapiens GN=FABP3 PE=1 SV=4	HUMAN	3	1.04644					1.02764
543	2.72	6.11	18.49	5.156	1.091	sp|Q5TZA2|CROCC_HUMAN	Rootletin OS=Homo sapiens GN=CROCC PE=1 SV=1	HUMAN	4	0.231366	0.443478	5710844	4.05135e-08	1.3213e+06	0.379712	0.344275	1617.11	0.000234809	614.036
544	2.71	2.76	41.56	36.36	36.36	sp|P50238|CRIP1_HUMAN	Cysteine-rich protein 1 OS=Homo sapiens GN=CRIP1 PE=1 SV=3	HUMAN	3	0.978968					0.911194
545	2.7	3.12	21.18	14.78	8.621	tr|B4DDD6|B4DDD6_HUMAN	Drebrin-like protein OS=Homo sapiens GN=DBNL PE=2 SV=1	HUMAN	3	1.38232	0.283071	2.60627	0.530382	3.6027	1.47205	0.293313	3.24747	0.453293	4.78044
546	2.7	2.78	6.886	4.025	2.648	sp|Q14697|GANAB_HUMAN	Neutral alpha-glucosidase AB OS=Homo sapiens GN=GANAB PE=1 SV=3	HUMAN	2	1.31948	0.276452	5.12272	0.257574	6.75933	3.12203	0.118961	15.4097	0.202601	48.1095
547	2.69	2.79	14.23	4.067	2.957	sp|P48643|TCPE_HUMAN	T-complex protein 1 subunit epsilon OS=Homo sapiens GN=CCT5 PE=1 SV=1	HUMAN	2	1.68372	0.122168	3.61897	0.465247	6.09332	1.49551	0.241144	7.65458	0.195374	11.4475
548	2.68	2.7	16	8.571	8.571	sp|P08567|PLEK_HUMAN	Pleckstrin OS=Homo sapiens GN=PLEK PE=1 SV=3	HUMAN	2	1.24658	0.543295	24.7746	0.0503168	30.8835	1.77522	0.497934	1401.23	0.0012669	2487.49
549	2.67	14.31	57.72	38.21	23.17	sp|P31946|1433B_HUMAN	14-3-3 protein beta/alpha OS=Homo sapiens GN=YWHAB PE=1 SV=3	HUMAN	14	1.32977	0.479263	4.14412	0.320881	5.51073	1.09762	0.451661	1.54068	0.712428	1.69108
550	2.61	2.71	16.15	9.938	5.28	sp|Q9Y5Y7|LYVE1_HUMAN	Lymphatic vessel endothelial hyaluronic acid receptor 1 OS=Homo sapiens GN=LYVE1 PE=1 SV=2	HUMAN	2	0.809253	0.495955	14.2277	0.0568786	11.5138	0.76203	0.247244	4.10761	0.185517	3.13012
551	2.6	2.66	5	2.593	2.593	tr|H0Y2Y8|H0Y2Y8_HUMAN	Zyxin (Fragment) OS=Homo sapiens GN=ZYX PE=4 SV=1	HUMAN	2	1.19514	0.322289	3.51075	0.340423	4.19584	2.01822	0.12364	5.78319	0.34898	11.6718
552	2.59	4.5	32.27	15.45	10	sp|P16035|TIMP2_HUMAN	Metalloproteinase inhibitor 2 OS=Homo sapiens GN=TIMP2 PE=1 SV=2	HUMAN	2	1.33703	0.215307	3.66193	0.365116	4.8961	1.29967	0.601662	100.403	0.0129446	130.491
553	2.55	3.33	14.24	2.62	0.9112	sp|O60437|PEPL_HUMAN	Periplakin OS=Homo sapiens GN=PPL PE=1 SV=4	HUMAN	2	0.814968	0.343505	4.74388	0.171794	3.86611	0.701168	0.182738	3.78691	0.185156	2.65526
554	2.51	2.51	14.56	14.56	10.76	sp|P10124|SRGN_HUMAN	Serglycin OS=Homo sapiens GN=SRGN PE=1 SV=3	HUMAN	1
555	2.49	2.61	21.64	14.18	8.955	sp|A6NHG4|DDTL_HUMAN	D-dopachrome decarboxylase-like protein OS=Homo sapiens GN=DDTL PE=2 SV=1	HUMAN	1	1.88558	0.1563	7.53267	0.250321	14.2035	0.879672	0.672963	17.9405	0.0490326	15.7818
556	2.49	2.54	6.032	2.681	1.877	tr|H3BQZ7|H3BQZ7_HUMAN	HCG2044799 OS=Homo sapiens GN=hCG_2044799 PE=4 SV=1	HUMAN	1	0.910696	0.822403	63.4072	0.0143627	57.7447	1.02839	0.947633	74.7953	0.0137494	76.9189
557	2.48	2.48	26.5	22.22	6.838	sp|P19957|ELAF_HUMAN	Elafin OS=Homo sapiens GN=PI3 PE=1 SV=3	HUMAN	1	1.17658	0.224378	1.40358	0.838272	1.65143	1.60709	0.0196576	1.39144	1.15498	2.23617
558	2.46	2.61	4.903	1.311	0.6271	sp|P39060|COIA1_HUMAN	Collagen alpha-1(XVIII) chain OS=Homo sapiens GN=COL18A1 PE=1 SV=5	HUMAN	1	0.722856	0.19247	3.61881	0.19975	2.61588	0.511002	0.0959646	3.65368	0.139859	1.86704
559	2.45	2.57	17.68	9.669	2.486	sp|P30490|1B52_HUMAN	HLA class I histocompatibility antigen, B-52 alpha chain OS=Homo sapiens GN=HLA-B PE=2 SV=1	HUMAN	1	1.02438	0.864754	4.13232	0.247894	4.23306	1.81367	0.117417	4.10103	0.442248	7.43792
560	2.45	2.45	37.9	33.87	27.42	sp|Q14508|WFDC2_HUMAN	WAP four-disulfide core domain protein 2 OS=Homo sapiens GN=WFDC2 PE=1 SV=2	HUMAN	6	2.91961	0.0391955	2.56165	1.13974	7.47901	1.97046	0.334803	10.1402	0.194322	19.9808
561	2.4	2.45	40.15	13.64	9.091	sp|P15090|FABP4_HUMAN	Fatty acid-binding protein, adipocyte OS=Homo sapiens GN=FABP4 PE=1 SV=3	HUMAN	2	0.818577					0.493528
562	2.38	2.48	8.108	3.534	2.287	sp|P18428|LBP_HUMAN	Lipopolysaccharide-binding protein OS=Homo sapiens GN=LBP PE=1 SV=3	HUMAN	1	0.633836	0.315958	23.0408	0.0275093	14.6041	0.407044	0.181772	28.5738	0.0142454	11.6308
563	2.37	3.37	19.42	15.05	6.796	sp|P11233|RALA_HUMAN	Ras-related protein Ral-A OS=Homo sapiens GN=RALA PE=1 SV=1	HUMAN	2	1.40575					2.59033
564	2.37	3.33	12.68	7.213	1.53	sp|Q15424|SAFB1_HUMAN	Scaffold attachment factor B1 OS=Homo sapiens GN=SAFB PE=1 SV=4	HUMAN	2	0.561861	0.180453	2.87194	0.195638	1.61363	0.670542	0.42539	3.98377	0.168318	2.67128
565	2.37	2.37	28.21	28.21	28.21	tr|B0YIW2|B0YIW2_HUMAN	Apolipoprotein C-III OS=Homo sapiens GN=APOC3 PE=4 SV=1	HUMAN	5	0.483979					0.846199
566	2.35	2.66	17.31	5.23	0.9963	sp|P14625|ENPL_HUMAN	Endoplasmin OS=Homo sapiens GN=HSP90B1 PE=1 SV=1	HUMAN	1	1.37211	0.0858574	1.53244	0.895376	2.10268	2.40333	0.212133	8.04833	0.298612	19.3428
567	2.29	3.03	10.79	0.8328	0.2562	sp|P24043|LAMA2_HUMAN	Laminin subunit alpha-2 OS=Homo sapiens GN=LAMA2 PE=1 SV=4	HUMAN	1	0.286099	0.507747	11902600	2.40367e-08	3.40532e+06	0.242318	0.30112	10065.8	2.40736e-05	2439.12
568	2.28	3	20.61	16.67	10.96	sp|Q9HB71|CYBP_HUMAN	Calcyclin-binding protein OS=Homo sapiens GN=CACYBP PE=1 SV=2	HUMAN	3	2.05641					2.47467
569	2.28	2.5	16.63	2.871	1.914	sp|Q15063|POSTN_HUMAN	Periostin OS=Homo sapiens GN=POSTN PE=1 SV=2	HUMAN	1	1.66582					1.82175
570	2.28	2.28	13.56	10.17	6.215	tr|J3QRS3|J3QRS3_HUMAN	Myosin regulatory light chain 12A OS=Homo sapiens GN=MYL12A PE=4 SV=1	HUMAN	1	1.63768	0.342515	42.104	0.038896	68.9526	2.93584	0.359009	5735.67	0.000511857	16839
571	2.27	2.72	11.31	3.241	1.323	sp|P07814|SYEP_HUMAN	Bifunctional glutamate/proline--tRNA ligase OS=Homo sapiens GN=EPRS PE=1 SV=5	HUMAN	2	0.214857					1.33312
572	2.27	2.31	5.139	2.158	1.542	sp|P19021|AMD_HUMAN	Peptidyl-glycine alpha-amidating monooxygenase OS=Homo sapiens GN=PAM PE=1 SV=2	HUMAN	1	1.89281	0.239528	24.6045	0.0769296	46.5716	2.25603	0.423212	3303.11	0.000683003	7451.93
573	2.26	2.78	21.76	16.74	6.695	tr|H3BPK3|H3BPK3_HUMAN	Hydroxyacylglutathione hydrolase, mitochondrial (Fragment) OS=Homo sapiens GN=HAGH PE=3 SV=1	HUMAN	1	0.910857	0.87035	312.483	0.00291491	284.627	1.5134	0.31813	17.7124	0.085443	26.8059
574	2.25	2.26	18.31	18.31	18.31	sp|O60234|GMFG_HUMAN	Glia maturation factor gamma OS=Homo sapiens GN=GMFG PE=1 SV=1	HUMAN	2	0.648297					1.8954
575	2.23	3.48	10.07	2.506	1.04	sp|Q14980|NUMA1_HUMAN	Nuclear mitotic apparatus protein 1 OS=Homo sapiens GN=NUMA1 PE=1 SV=2	HUMAN	2	1.71286					2.38232
576	2.23	2.56	8.912	1.204	0.4817	sp|P11717|MPRI_HUMAN	Cation-independent mannose-6-phosphate receptor OS=Homo sapiens GN=IGF2R PE=1 SV=3	HUMAN	1	0.9178					0.809802
577	2.23	2.28	10.15	3.448	1.341	sp|P00390|GSHR_HUMAN	Glutathione reductase, mitochondrial OS=Homo sapiens GN=GSR PE=1 SV=2	HUMAN	1	1.00634					2.34237
578	2.22	2.44	15.41	4.239	2.312	sp|P28838|AMPL_HUMAN	Cytosol aminopeptidase OS=Homo sapiens GN=LAP3 PE=1 SV=3	HUMAN	1	1.37469	0.429336	25.3424	0.0542448	34.838	2.13784	0.189122	19.209	0.111294	41.0658
579	2.21	2.39	18.25	8.226	3.599	tr|A8MYB8|A8MYB8_HUMAN	Aldehyde dehydrogenase, dimeric NADP-preferring OS=Homo sapiens GN=ALDH3A1 PE=3 SV=1	HUMAN	1	1.17592	0.778553	292.518	0.00401999	343.976	1.00478	0.96938	3.52209	0.28528	3.53893
581	2.19	2.33	6.684	2.883	1.048	sp|Q06481|APLP2_HUMAN	Amyloid-like protein 2 OS=Homo sapiens GN=APLP2 PE=1 SV=2	HUMAN	1	0.960948	0.803808	4.90398	0.195953	4.71247	0.541097	0.247203	24.3421	0.0222289	13.1714
582	2.18	2.38	11.28	3.47	1.363	sp|Q9HCB6|SPON1_HUMAN	Spondin-1 OS=Homo sapiens GN=SPON1 PE=1 SV=2	HUMAN	1	1.40404	0.245152	2.45271	0.572444	3.44371	0.688062	0.0532094	1.47213	0.467392	1.01292
583	2.17	2.85	10.56	7.778	4.444	tr|Q86UY0|Q86UY0_HUMAN	TXNDC5 protein OS=Homo sapiens GN=TXNDC5 PE=2 SV=1	HUMAN	2	1.21128					0.710286
584	2.17	2.22	9.04	4.802	3.107	sp|A8MTJ3|GNAT3_HUMAN	Guanine nucleotide-binding protein G(t) subunit alpha-3 OS=Homo sapiens GN=GNAT3 PE=2 SV=2	HUMAN	1	1.02278					1.32087
585	2.15	2.32	11.48	4.645	2.186	sp|P13010|XRCC5_HUMAN	X-ray repair cross-complementing protein 5 OS=Homo sapiens GN=XRCC5 PE=1 SV=3	HUMAN	2	1.47104	0.499403	7.6205	0.193037	11.21	1.33366	0.547728	5.62721	0.237002	7.50479
586	2.15	2.19	6.408	3.373	1.686	sp|P28799|GRN_HUMAN	Granulins OS=Homo sapiens GN=GRN PE=1 SV=2	HUMAN	1	0.765904	0.231432	3.62984	0.211002	2.78011	1.06793	0.635683	3.65565	0.29213	3.90397
587	2.13	4.14	17.9	10.23	7.67	sp|Q9NYL9|TMOD3_HUMAN	Tropomodulin-3 OS=Homo sapiens GN=TMOD3 PE=1 SV=1	HUMAN	2	1.16377	0.833519	1339.85	0.000868581	1559.28	0.979976	0.974858	668.067	0.00146688	654.69
588	2.13	2.41	7.963	1.76	0.922	sp|Q13753|LAMC2_HUMAN	Laminin subunit gamma-2 OS=Homo sapiens GN=LAMC2 PE=1 SV=2	HUMAN	1	1.08697					0.512323
589	2.13	2.4	5.265	2.083	1.493	sp|P58107|EPIPL_HUMAN	Epiplakin OS=Homo sapiens GN=EPPK1 PE=1 SV=2	HUMAN	1	0.780473	0.666801	234.469	0.00332869	182.997	0.763264	0.746255	3466.65	0.000220173	2645.97
590	2.13	2.26	5.813	1.799	0.692	sp|P23470|PTPRG_HUMAN	Receptor-type tyrosine-protein phosphatase gamma OS=Homo sapiens GN=PTPRG PE=1 SV=4	HUMAN	1	0.660461	0.321714	18.4688	0.035761	12.1979	0.540575	0.345293	111.092	0.00486602	60.0535
591	2.13	2.15	10.31	6.873	3.436	sp|P17936|IBP3_HUMAN	Insulin-like growth factor-binding protein 3 OS=Homo sapiens GN=IGFBP3 PE=1 SV=2	HUMAN	1	0.261108	0.0477033	3.59981	0.0725339	0.939941	0.185004	0.0763438	13.243	0.0139699	2.45001
592	2.11	2.15	35.56	23.33	23.33	tr|A6NL93|A6NL93_HUMAN	Non-histone chromosomal protein HMG-14 OS=Homo sapiens GN=HMGN1 PE=4 SV=1	HUMAN	3	1.1373	0.450353	4.04616	0.281082	4.60171	1.88147	0.109529	4.03696	0.466061	7.59542
593	2.11	2.13	9.985	4.236	3.328	sp|Q9NQ79|CRAC1_HUMAN	Cartilage acidic protein 1 OS=Homo sapiens GN=CRTAC1 PE=1 SV=2	HUMAN	1	0.571627	0.316715	47.4168	0.0120554	27.1048	0.250131	0.334803	27447.2	9.11314e-06	6865.4
595	2.1	2.41	8.121	0.6961	0.406	sp|Q9UKK3|PARP4_HUMAN	Poly [ADP-ribose] polymerase 4 OS=Homo sapiens GN=PARP4 PE=1 SV=3	HUMAN	1
596	2.1	2.2	22.22	6.25	6.25	sp|Q02878|RL6_HUMAN	60S ribosomal protein L6 OS=Homo sapiens GN=RPL6 PE=1 SV=3	HUMAN	1	0.769154					0.875215
597	2.09	2.87	10.07	5.152	5.152	sp|P29622|KAIN_HUMAN	Kallistatin OS=Homo sapiens GN=SERPINA4 PE=1 SV=3	HUMAN	2	0.408641	0.0137258	1.57753	0.259039	0.644642	0.629837	0.27589	3.81806	0.164963	2.40475
598	2.09	2.48	4.651	2.481	1.55	tr|F8VPG7|F8VPG7_HUMAN	Phosphatidylinositol-binding clathrin assembly protein OS=Homo sapiens GN=PICALM PE=4 SV=1	HUMAN	1	1.19603					1.55337
599	2.09	2.27	9.914	3.664	1.724	sp|Q9BZQ8|NIBAN_HUMAN	Protein Niban OS=Homo sapiens GN=FAM129A PE=1 SV=1	HUMAN	1	0.70182					1.35546
600	2.09	2.18	10.27	1.507	1.507	sp|P52272|HNRPM_HUMAN	Heterogeneous nuclear ribonucleoprotein M OS=Homo sapiens GN=HNRNPM PE=1 SV=3	HUMAN	2	1.74843					2.9012
601	2.08	2.15	7.838	4.054	2.703	tr|G3V2F7|G3V2F7_HUMAN	HCG2044781 OS=Homo sapiens GN=TMEM189 PE=4 SV=1	HUMAN	1	1.24057					1.12589
602	2.08	2.11	9.74	2.814	1.732	tr|F8W9Q2|F8W9Q2_HUMAN	RNA polymerase II-associated factor 1 homolog OS=Homo sapiens GN=PAF1 PE=4 SV=1	HUMAN	1	1.70612					1.36376
603	2.08	2.1	11.99	2.934	1.403	sp|P33151|CADH5_HUMAN	Cadherin-5 OS=Homo sapiens GN=CDH5 PE=1 SV=5	HUMAN	1	0.546377					0.479611
604	2.08	2.08	19.72	8.451	4.93	tr|C9JRR0|C9JRR0_HUMAN	Augurin (Fragment) OS=Homo sapiens GN=C2orf40 PE=4 SV=1	HUMAN	1	1.74784	0.461848	539.996	0.00323676	943.824	3.43878	0.432396	318072	1.08113e-05	1.09378e+06
606	2.07	2.37	6.359	1.519	0.9567	tr|D3YTG3|D3YTG3_HUMAN	Target of Nesh-SH3 OS=Homo sapiens GN=ABI3BP PE=4 SV=1	HUMAN	1	0.435785					0.638554
607	2.07	2.18	3.279	1.865	1.187	tr|G3V511|G3V511_HUMAN	Latent-transforming growth factor beta-binding protein 2 OS=Homo sapiens GN=LTBP2 PE=4 SV=1	HUMAN	2	1.4121					1.03456
608	2.07	2.12	12.01	6.769	3.93	sp|Q8N4F0|BPIB2_HUMAN	BPI fold-containing family B member 2 OS=Homo sapiens GN=BPIFB2 PE=1 SV=2	HUMAN	1	3.12716	0.327447	3590.62	0.000870924	11228.4	6.15437	0.286648	70315.7	8.75248e-05	432748
609	2.07	2.1	27.32	16.94	7.65	sp|Q13185|CBX3_HUMAN	Chromobox protein homolog 3 OS=Homo sapiens GN=CBX3 PE=1 SV=4	HUMAN	1	0.97948					2.21585
610	2.06	2.7	14.45	12.14	12.14	sp|Q969H8|CS010_HUMAN	UPF0556 protein C19orf10 OS=Homo sapiens GN=C19orf10 PE=1 SV=1	HUMAN	2	0.552605					1.66812
611	2.06	2.31	9.025	3.785	3.057	sp|Q9NPH3-5|IL1AP_HUMAN	Isoform 4 of Interleukin-1 receptor accessory protein OS=Homo sapiens GN=IL1RAP	HUMAN	3	0.541051	0.103906	3.61561	0.149643	1.95623	0.372416	0.118876	10.7095	0.0347743	3.98839
612	2.06	2.28	8.563	2.264	1.476	sp|Q9Y6C2|EMIL1_HUMAN	EMILIN-1 OS=Homo sapiens GN=EMILIN1 PE=1 SV=2	HUMAN	1	1.3256					0.787129
613	2.06	2.24	10.65	1.111	1.111	sp|Q5RHP9|CA173_HUMAN	Uncharacterized protein C1orf173 OS=Homo sapiens GN=C1orf173 PE=2 SV=1	HUMAN	1	0.88679					2.24291
614	2.06	2.16	7.746	3.521	2.641	sp|Q9UHD8-2|SEPT9_HUMAN	Isoform 2 of Septin-9 OS=Homo sapiens GN=SEPT9	HUMAN	1	0.299704					0.696134
615	2.06	2.12	18.78	6.939	4.082	sp|P02745|C1QA_HUMAN	Complement C1q subcomponent subunit A OS=Homo sapiens GN=C1QA PE=1 SV=2	HUMAN	1	0.662977	0.416912	55.1716	0.0120166	36.5775	0.470922	0.087185	3.73835	0.125971	1.76047
616	2.06	2.1	9.476	4.435	1.815	tr|H7C3P4|H7C3P4_HUMAN	Glucosamine (N-acetyl)-6-sulfatase (Sanfilippo disease IIID), isoform CRA_b OS=Homo sapiens GN=GNS PE=4 SV=1	HUMAN	1	1.1905					1.20773
617	2.06	2.06	24.64	24.64	17.39	sp|P62857|RS28_HUMAN	40S ribosomal protein S28 OS=Homo sapiens GN=RPS28 PE=1 SV=1	HUMAN	1	1.1244					1.44133
618	2.05	10.23	40.78	28.34	11.98	sp|P09104|ENOG_HUMAN	Gamma-enolase OS=Homo sapiens GN=ENO2 PE=1 SV=3	HUMAN	9	1.19287					1.38119
620	2.05	2.19	8.656	2.05	1.367	tr|E9PPJ0|E9PPJ0_HUMAN	Splicing factor 3B subunit 2 OS=Homo sapiens GN=SF3B2 PE=4 SV=1	HUMAN	1	0.747035					0.793742
621	2.05	2.12	5.433	3.396	2.207	sp|Q9UMX0|UBQL1_HUMAN	Ubiquilin-1 OS=Homo sapiens GN=UBQLN1 PE=1 SV=2	HUMAN	1	1.01181					1.08809
622	2.05	2.09	15.92	8.955	8.955	sp|Q01995|TAGL_HUMAN	Transgelin OS=Homo sapiens GN=TAGLN PE=1 SV=4	HUMAN	2	1.09621					0.889618
623	2.04	2.9	15.48	2.976	2.976	sp|Q13217|DNJC3_HUMAN	DnaJ homolog subfamily C member 3 OS=Homo sapiens GN=DNAJC3 PE=1 SV=1	HUMAN	2	0.784594	0.521351	27.0135	0.0290445	21.1947	0.992965	0.985552	52.0335	0.0190832	51.6674
624	2.04	2.2	9.395	0.8758	0.8758	tr|E9PC28|E9PC28_HUMAN	Receptor-type tyrosine-protein phosphatase C OS=Homo sapiens GN=PTPRC PE=4 SV=1	HUMAN	1	0.810757	0.283048	3.56063	0.2277	2.88681	1.26179	0.401396	8.64111	0.146022	10.9033
625	2.04	2.15	14.02	5.607	2.57	tr|J3QLD9|J3QLD9_HUMAN	Flotillin-2 OS=Homo sapiens GN=FLOT2 PE=4 SV=1	HUMAN	1	1.34652					5.94576
626	2.04	2.12	11.17	2.707	2.707	tr|E7EQV3|E7EQV3_HUMAN	Polyadenylate-binding protein 1 OS=Homo sapiens GN=PABPC1 PE=4 SV=1	HUMAN	1	1.03825					0.702709
627	2.04	2.09	9.074	2.722	1.633	sp|O15389|SIGL5_HUMAN	Sialic acid-binding Ig-like lectin 5 OS=Homo sapiens GN=SIGLEC5 PE=1 SV=1	HUMAN	1	1.93479					1.46384
628	2.04	2.08	13.37	2.941	2.941	sp|Q6P6B1|CH047_HUMAN	Uncharacterized protein C8orf47 OS=Homo sapiens GN=C8orf47 PE=2 SV=1	HUMAN	1	1.57657					3.86841
629	2.04	2.07	6.389	3.715	3.715	sp|Q6EMK4|VASN_HUMAN	Vasorin OS=Homo sapiens GN=VASN PE=1 SV=1	HUMAN	2	0.444644					0.558065
630	2.04	2.07	6.25	2.083	2.083	tr|I3L1N7|I3L1N7_HUMAN	Sex hormone-binding globulin OS=Homo sapiens GN=SHBG PE=4 SV=1	HUMAN	1	1.13712	0.464766	4.31159	0.263736	4.90281	0.898676	0.624654	7.60752	0.11813	6.83669
631	2.04	2.05	18.64	15.82	8.475	sp|P18510|IL1RA_HUMAN	Interleukin-1 receptor antagonist protein OS=Homo sapiens GN=IL1RN PE=1 SV=1	HUMAN	1	0.359745					0.408668
632	2.04	2.04	21.62	4.054	4.054	tr|J3KN29|J3KN29_HUMAN	26S proteasome non-ATPase regulatory subunit 9 OS=Homo sapiens GN=PSMD9 PE=4 SV=1	HUMAN	1	0.977762	0.947366	31.4475	0.0310919	30.7481	0.964119	0.777759	3.5805	0.269269	3.45203
633	2.04	2.04	21.28	21.28	21.28	sp|P59666|DEF3_HUMAN	Neutrophil defensin 3 OS=Homo sapiens GN=DEFA3 PE=1 SV=1	HUMAN	2	0.866262					1.65226
635	2.03	3.02	9.774	6.015	4.511	tr|E9PF41|E9PF41_HUMAN	Actin-related protein 2 OS=Homo sapiens GN=ACTR2 PE=3 SV=1	HUMAN	2	0.488219					0.742065
636	2.03	2.31	13.6	7.456	4.386	tr|G8JLH6|G8JLH6_HUMAN	CD9 antigen (Fragment) OS=Homo sapiens GN=CD9 PE=4 SV=1	HUMAN	1	0.443581					0.573335
637	2.03	2.27	14.33	4.775	3.09	sp|Q15365|PCBP1_HUMAN	Poly(rC)-binding protein 1 OS=Homo sapiens GN=PCBP1 PE=1 SV=2	HUMAN	1	1.78215					0.841197
638	2.03	2.24	8.815	1.114	1.114	tr|Q5VY93|Q5VY93_HUMAN	Rho guanine nucleotide exchange factor 2 OS=Homo sapiens GN=ARHGEF2 PE=2 SV=1	HUMAN	1	0.937996					1.92305
639	2.03	2.24	10.45	1.306	1.306	tr|Q5T5C7|Q5T5C7_HUMAN	Serine--tRNA ligase, cytoplasmic OS=Homo sapiens GN=SARS PE=2 SV=1	HUMAN	1	0.665145					0.479936
640	2.03	2.16	5.698	1.788	1.788	sp|Q14118|DAG1_HUMAN	Dystroglycan OS=Homo sapiens GN=DAG1 PE=1 SV=2	HUMAN	1	0.499984					0.227911
641	2.03	2.15	5.036	1.079	0.4496	sp|P12259|FA5_HUMAN	Coagulation factor V OS=Homo sapiens GN=F5 PE=1 SV=4	HUMAN	1	0.471703					0.480603
642	2.03	2.13	12.84	4.421	4.421	sp|Q96KP4|CNDP2_HUMAN	Cytosolic non-specific dipeptidase OS=Homo sapiens GN=CNDP2 PE=1 SV=2	HUMAN	1	0.374611	0.116688	10.1012	0.0370859	3.78402	0.70079	0.176766	3.62417	0.193366	2.53979
643	2.03	2.13	4.576	2.002	0.9533	sp|Q02413|DSG1_HUMAN	Desmoglein-1 OS=Homo sapiens GN=DSG1 PE=1 SV=2	HUMAN	1
645	2.03	2.12	20.77	8.197	5.464	tr|C9J0A7|C9J0A7_HUMAN	Charged multivesicular body protein 2b OS=Homo sapiens GN=CHMP2B PE=4 SV=1	HUMAN	1	1.73027					3.4666
646	2.03	2.1	12.17	2.676	2.676	sp|Q13510-2|ASAH1_HUMAN	Isoform 2 of Acid ceramidase OS=Homo sapiens GN=ASAH1	HUMAN	1	0.594201					0.518735
647	2.03	2.09	9.615	4.06	2.778	sp|P43353|AL3B1_HUMAN	Aldehyde dehydrogenase family 3 member B1 OS=Homo sapiens GN=ALDH3B1 PE=1 SV=1	HUMAN	1	1.33754					1.10565
648	2.03	2.07	12.65	5.422	3.614	sp|Q53FA7|QORX_HUMAN	Quinone oxidoreductase PIG3 OS=Homo sapiens GN=TP53I3 PE=1 SV=2	HUMAN	1	1.30611	0.360332	8.63532	0.151252	11.2787	1.31809	0.246198	4.17474	0.31573	5.50267
649	2.03	2.06	3.046	1.05	1.05	sp|P10253|LYAG_HUMAN	Lysosomal alpha-glucosidase OS=Homo sapiens GN=GAA PE=1 SV=4	HUMAN	1	0.772342					1.1343
650	2.02	22.43	36.67	33.03	28.79	sp|Q03591|FHR1_HUMAN	Complement factor H-related protein 1 OS=Homo sapiens GN=CFHR1 PE=1 SV=2	HUMAN	15
652	2.02	2.33	8.937	2.161	0.7009	sp|P08572|CO4A2_HUMAN	Collagen alpha-2(IV) chain OS=Homo sapiens GN=COL4A2 PE=1 SV=4	HUMAN	1	0.939227					1.12992
653	2.02	2.17	14.52	9.677	4.839	sp|O15143|ARC1B_HUMAN	Actin-related protein 2/3 complex subunit 1B OS=Homo sapiens GN=ARPC1B PE=1 SV=3	HUMAN	1	1.36204					2.49919
654	2.02	2.16	13.03	2.385	1.468	sp|P49368|TCPG_HUMAN	T-complex protein 1 subunit gamma OS=Homo sapiens GN=CCT3 PE=1 SV=4	HUMAN	1	1.43297					0.944597
655	2.02	2.15	12.5	4.167	3.03	sp|P54577|SYYC_HUMAN	Tyrosine--tRNA ligase, cytoplasmic OS=Homo sapiens GN=YARS PE=1 SV=4	HUMAN	2	1.8992					2.45381
657	2.02	2.09	8.493	1.911	1.911	tr|G3XAD9|G3XAD9_HUMAN	Alpha-N-acetylgalactosaminide alpha-2,6-sialyltransferase 1 OS=Homo sapiens GN=ST6GALNAC1 PE=4 SV=1	HUMAN	1	2.00236					1.59093
659	2.02	2.07	8.564	3.315	3.315	sp|Q9BRK5|CAB45_HUMAN	45 kDa calcium-binding protein OS=Homo sapiens GN=SDF4 PE=1 SV=1	HUMAN	1	1.22361					4.13076
660	2.02	2.05	8.13	2.71	2.71	sp|Q8NFI4|F10A5_HUMAN	Putative protein FAM10A5 OS=Homo sapiens GN=ST13P5 PE=5 SV=1	HUMAN	1	0.598215					0.580074
661	2.02	2.04	18.18	7.071	7.071	sp|P31431|SDC4_HUMAN	Syndecan-4 OS=Homo sapiens GN=SDC4 PE=1 SV=2	HUMAN	1	0.463405	0.0818116	3.53554	0.131071	1.63838	0.295932	0.427404	217837	1.3585e-06	64464.9
662	2.02	2.03	4.067	0.6973	0.6973	sp|Q14766|LTBP1_HUMAN	Latent-transforming growth factor beta-binding protein 1 OS=Homo sapiens GN=LTBP1 PE=1 SV=4	HUMAN	1	1.2047	0.831681	6248.67	0.000192793	7527.77	4.70487	0.539844	4875943936	9.64915e-10	2.29407e+10
663	2.02	2.03	9.783	7.609	5.435	sp|O43240|KLK10_HUMAN	Kallikrein-10 OS=Homo sapiens GN=KLK10 PE=1 SV=3	HUMAN	1	0.560691					0.663273
664	2.02	2.02	4.921	1.429	1.429	tr|E9PHD4|E9PHD4_HUMAN	Lipolysis-stimulated lipoprotein receptor OS=Homo sapiens GN=LSR PE=4 SV=1	HUMAN	1	0.807026	0.274994	3.51072	0.229875	2.83324	1.98558	0.0911228	3.51148	0.565453	6.97232
666	2.01	7.66	14.33	12.12	10.74	sp|P54725|RD23A_HUMAN	UV excision repair protein RAD23 homolog A OS=Homo sapiens GN=RAD23A PE=1 SV=1	HUMAN	5	0.739331					0.699115
667	2.01	3.72	8.719	3.025	3.025	tr|F8WF14|F8WF14_HUMAN	Cholinesterase OS=Homo sapiens GN=BCHE PE=4 SV=1	HUMAN	2	0.264406					0.526328
668	2.01	2.31	5.604	1.632	0.6529	sp|O15031|PLXB2_HUMAN	Plexin-B2 OS=Homo sapiens GN=PLXNB2 PE=1 SV=3	HUMAN	1	1.4066					0.940434
669	2.01	2.25	9.415	2.12	1.696	sp|Q92896|GSLG1_HUMAN	Golgi apparatus protein 1 OS=Homo sapiens GN=GLG1 PE=1 SV=2	HUMAN	2	1.34582					2.73388
670	2.01	2.15	6.524	2.055	0.983	sp|Q9HBR0|S38AA_HUMAN	Putative sodium-coupled neutral amino acid transporter 10 OS=Homo sapiens GN=SLC38A10 PE=1 SV=2	HUMAN	1	0.823945					1.76109
671	2.01	2.13	5.16	0.5733	0.5733	sp|Q86SQ4|GP126_HUMAN	G-protein coupled receptor 126 OS=Homo sapiens GN=GPR126 PE=1 SV=3	HUMAN	1	0.789822					0.80447
672	2.01	2.13	9.984	1.585	1.585	sp|Q9H4E7|DEFI6_HUMAN	Differentially expressed in FDCP 6 homolog OS=Homo sapiens GN=DEF6 PE=1 SV=1	HUMAN	1	1.15318					1.2529
673	2.01	2.11	5.997	2.699	1.949	sp|Q86UX7|URP2_HUMAN	Fermitin family homolog 3 OS=Homo sapiens GN=FERMT3 PE=1 SV=1	HUMAN	1	0.645499					2.76341
674	2.01	2.09	9.635	2.604	2.604	tr|G3V1Q4|G3V1Q4_HUMAN	Septin 7, isoform CRA_a OS=Homo sapiens GN=SEPT7 PE=3 SV=1	HUMAN	1	1.09204					1.38156
675	2.01	2.08	9.808	2.345	2.345	tr|B4DDJ5|B4DDJ5_HUMAN	Macrophage scavenger receptor types I and II OS=Homo sapiens GN=MSR1 PE=2 SV=1	HUMAN	1	0.653919	0.677731	16899.2	3.86952e-05	11050.7	0.676019	0.604821	1050.96	0.00064324	710.469
676	2.01	2.08	11.41	3.604	3.604	sp|O14908|GIPC1_HUMAN	PDZ domain-containing protein GIPC1 OS=Homo sapiens GN=GIPC1 PE=1 SV=2	HUMAN	1	2.84632					1.674
677	2.01	2.07	11.13	5.892	2.946	sp|Q96HN2|SAHH3_HUMAN	Putative adenosylhomocysteinase 3 OS=Homo sapiens GN=AHCYL2 PE=1 SV=1	HUMAN	1	0.898482					1.00115
678	2.01	2.07	11.39	2.5	2.5	tr|G3V181|G3V181_HUMAN	Synaptotagmin-like 1, isoform CRA_d OS=Homo sapiens GN=SYTL1 PE=4 SV=1	HUMAN	1	2.27307					8.13329
679	2.01	2.07	14.61	5.479	3.196	sp|Q9NZZ3|CHMP5_HUMAN	Charged multivesicular body protein 5 OS=Homo sapiens GN=CHMP5 PE=1 SV=1	HUMAN	1	1.82219					1.41575
680	2.01	2.06	6.667	3.81	3.81	sp|O96009|NAPSA_HUMAN	Napsin-A OS=Homo sapiens GN=NAPSA PE=1 SV=1	HUMAN	2	0.588255					0.488298
681	2.01	2.05	14.88	6.548	4.762	tr|B4DT77|B4DT77_HUMAN	Annexin OS=Homo sapiens GN=ANXA7 PE=2 SV=1	HUMAN	1	0.69468					0.739987
682	2.01	2.05	12.73	7.727	7.727	tr|B5MCC9|B5MCC9_HUMAN	Cell growth regulator with EF hand domain protein 1 OS=Homo sapiens GN=CGREF1 PE=4 SV=1	HUMAN	1	1.01366					1.04672
683	2.01	2.04	3.971	1.324	1.324	sp|Q99523|SORT_HUMAN	Sortilin OS=Homo sapiens GN=SORT1 PE=1 SV=3	HUMAN	1	2.04572					0.612066
684	2.01	2.03	4.994	1.93	1.249	sp|Q9UPN7|PP6R1_HUMAN	Serine/threonine-protein phosphatase 6 regulatory subunit 1 OS=Homo sapiens GN=PPP6R1 PE=1 SV=5	HUMAN	1	1.17953					1.47609
685	2.01	2.03	7.895	1.974	1.974	tr|J3KPM2|J3KPM2_HUMAN	Leukocyte immunoglobulin-like receptor subfamily A member 3 OS=Homo sapiens GN=LILRA3 PE=4 SV=1	HUMAN	1	0.633614					0.687516
686	2.01	2.03	8.117	5.195	5.195	sp|Q99988|GDF15_HUMAN	Growth/differentiation factor 15 OS=Homo sapiens GN=GDF15 PE=1 SV=3	HUMAN	1	0.820845					0.680531
687	2.01	2.02	17.62	10.57	3.524	tr|Q6ZS74|Q6ZS74_HUMAN	Ras-related protein Ral-B OS=Homo sapiens GN=RALB PE=2 SV=1	HUMAN	1	1.49451					3.29088
688	2.01	2.02	42.37	9.322	9.322	sp|O75348|VATG1_HUMAN	V-type proton ATPase subunit G 1 OS=Homo sapiens GN=ATP6V1G1 PE=1 SV=3	HUMAN	1	0.948261					1.24533
689	2.01	2.01	19.65	6.55	6.55	tr|D6RA08|D6RA08_HUMAN	Complement C1q subcomponent subunit B (Fragment) OS=Homo sapiens GN=C1QB PE=4 SV=1	HUMAN	1	0.411729					0.458922
691	2	36.25	47.92	39.06	33.16	tr|G3XAM2|G3XAM2_HUMAN	Complement factor I OS=Homo sapiens GN=CFI PE=3 SV=1	HUMAN	33
692	2	6.11	12.61	4.928	4.928	sp|O95436|NPT2B_HUMAN	Sodium-dependent phosphate transport protein 2B OS=Homo sapiens GN=SLC34A2 PE=1 SV=3	HUMAN	3	2.67766					3.06737
693	2	5.66	22.55	12.42	12.42	tr|F8VSB5|F8VSB5_HUMAN	Heterogeneous nuclear ribonucleoprotein A1 OS=Homo sapiens GN=HNRNPA1 PE=4 SV=1	HUMAN	4	1.77172					1.37025
694	2	2.98	20.51	12.82	12.82	sp|P49006|MRP_HUMAN	MARCKS-related protein OS=Homo sapiens GN=MARCKSL1 PE=1 SV=2	HUMAN	2	0.935143					1.26408
695	2	2.65	6.897	6.897	6.897	sp|O76096|CYTF_HUMAN	Cystatin-F OS=Homo sapiens GN=CST7 PE=1 SV=1	HUMAN	2
696	2	2.23	9.444	1.994	1.364	sp|P53618|COPB_HUMAN	Coatomer subunit beta OS=Homo sapiens GN=COPB1 PE=1 SV=3	HUMAN	1	0.542363					0.724463
697	2	2.22	10.25	3.058	1.259	sp|P07686|HEXB_HUMAN	Beta-hexosaminidase subunit beta OS=Homo sapiens GN=HEXB PE=1 SV=3	HUMAN	1	0.705339					1.04898
698	2	2.21	13.64	4.16	2.496	sp|Q9BW04|SARG_HUMAN	Specifically androgen-regulated gene protein OS=Homo sapiens GN=SARG PE=1 SV=2	HUMAN	1
699	2	2.16	15.37	4.009	2.673	tr|J3KNE5|J3KNE5_HUMAN	Histidine--tRNA ligase, cytoplasmic OS=Homo sapiens GN=HARS PE=4 SV=1	HUMAN	1	2.34906					1.27989
700	2	2.15	17.97	8.295	5.991	sp|P62906|RL10A_HUMAN	60S ribosomal protein L10a OS=Homo sapiens GN=RPL10A PE=1 SV=2	HUMAN	1	0.761355					0.975073
701	2	2.14	7.977	2.724	1.751	tr|F5GY20|F5GY20_HUMAN	Transmembrane glycoprotein NMB OS=Homo sapiens GN=GPNMB PE=4 SV=1	HUMAN	1	0.582983					0.522115
702	2	2.12	8.661	4.199	2.625	sp|P12277|KCRB_HUMAN	Creatine kinase B-type OS=Homo sapiens GN=CKB PE=1 SV=1	HUMAN	1	0.996659					0.699712
703	2	2.11	10.31	2.335	1.265	sp|P12109|CO6A1_HUMAN	Collagen alpha-1(VI) chain OS=Homo sapiens GN=COL6A1 PE=1 SV=3	HUMAN	1	0.830318					0.662185
704	2	2.11	28.35	6.701	6.701	sp|P07305|H10_HUMAN	Histone H1.0 OS=Homo sapiens GN=H1F0 PE=1 SV=3	HUMAN	1	0.743688					1.1599
705	2	2.1	5.453	1.337	1.337	sp|P07333|CSF1R_HUMAN	Macrophage colony-stimulating factor 1 receptor OS=Homo sapiens GN=CSF1R PE=1 SV=2	HUMAN	2	0.578686					0.648159
706	2	2.1	18.18	8.134	5.024	sp|P61158|ARP3_HUMAN	Actin-related protein 3 OS=Homo sapiens GN=ACTR3 PE=1 SV=3	HUMAN	1	0.766448					0.983493
707	2	2.1	8.18	5.317	3.067	sp|Q9BR76|COR1B_HUMAN	Coronin-1B OS=Homo sapiens GN=CORO1B PE=1 SV=1	HUMAN	1	1.81045					1.03709
708	2	2.1	23	14	11.5	sp|P61026|RAB10_HUMAN	Ras-related protein Rab-10 OS=Homo sapiens GN=RAB10 PE=1 SV=1	HUMAN	2	1.19599					2.36851
709	2	2.09	6.037	2.625	2.625	sp|P26022|PTX3_HUMAN	Pentraxin-related protein PTX3 OS=Homo sapiens GN=PTX3 PE=1 SV=3	HUMAN	1	0.954482					0.586467
710	2	2.08	6.604	2.264	1.321	sp|O43865|SAHH2_HUMAN	Putative adenosylhomocysteinase 2 OS=Homo sapiens GN=AHCYL1 PE=1 SV=2	HUMAN	1
711	2	2.08	4.965	1.891	1.891	tr|B5MBX2|B5MBX2_HUMAN	Transcobalamin-2 OS=Homo sapiens GN=TCN2 PE=4 SV=1	HUMAN	1	1.43189					2.22742
712	2	2.08	18.9	12.6	8.661	sp|P53999|TCP4_HUMAN	Activated RNA polymerase II transcriptional coactivator p15 OS=Homo sapiens GN=SUB1 PE=1 SV=3	HUMAN	1	1.0546					0.969393
714	2	2.07	17.19	7.163	5.444	sp|Q6IBS0|TWF2_HUMAN	Twinfilin-2 OS=Homo sapiens GN=TWF2 PE=1 SV=2	HUMAN	1	0.895399					1.2473
715	2	2.07	6.034	3.017	1.724	tr|B4DKT0|B4DKT0_HUMAN	Golgi reassembly-stacking protein 2 OS=Homo sapiens GN=GORASP2 PE=2 SV=1	HUMAN	1	1.94046					2.17145
716	2	2.06	19.93	5.435	5.435	sp|Q86Y82|STX12_HUMAN	Syntaxin-12 OS=Homo sapiens GN=STX12 PE=1 SV=1	HUMAN	1	0.564712					0.698371
717	2	2.04	8.832	1.994	1.994	tr|G5E9G0|G5E9G0_HUMAN	60S ribosomal protein L3 OS=Homo sapiens GN=RPL3 PE=2 SV=1	HUMAN	1	1.21101					1.04501
718	2	2.04	5.072	1.691	1.691	sp|P05107|ITB2_HUMAN	Integrin beta-2 OS=Homo sapiens GN=ITGB2 PE=1 SV=2	HUMAN	1	0.588969					0.587965
719	2	2.04	29.27	11.38	11.38	sp|Q9BRA2|TXD17_HUMAN	Thioredoxin domain-containing protein 17 OS=Homo sapiens GN=TXNDC17 PE=1 SV=1	HUMAN	1	1.15276					0.960278
720	2	2.04	8.896	4.908	2.761	sp|O00602|FCN1_HUMAN	Ficolin-1 OS=Homo sapiens GN=FCN1 PE=1 SV=2	HUMAN	1	1.09798					1.60681
721	2	2.04	20.16	16.28	10.85	tr|Q5SRP5|Q5SRP5_HUMAN	Apolipoprotein M OS=Homo sapiens GN=APOM PE=4 SV=1	HUMAN	1	0.169818					0.258185
722	2	2.03	7.682	1.235	1.235	tr|G5E9B4|G5E9B4_HUMAN	Adenosine deaminase, RNA-specific, B1 (RED1 homolog rat), isoform CRA_a OS=Homo sapiens GN=ADARB1 PE=4 SV=1	HUMAN	1	0.110097					0.12842
723	2	2.03	6.147	2.128	2.128	sp|Q9NS68|TNR19_HUMAN	Tumor necrosis factor receptor superfamily member 19 OS=Homo sapiens GN=TNFRSF19 PE=1 SV=1	HUMAN	1	0.673849					1.31676
724	2	2.03	7.54	3.968	3.968	sp|O43291|SPIT2_HUMAN	Kunitz-type protease inhibitor 2 OS=Homo sapiens GN=SPINT2 PE=1 SV=2	HUMAN	1	1.02927					1.22956
725	2	2.03	7.661	4.435	4.435	tr|F8W8N6|F8W8N6_HUMAN	CD177 antigen OS=Homo sapiens GN=CD177 PE=4 SV=1	HUMAN	1	0.516327					0.651153
726	2	2.03	4.32	2.16	2.16	sp|Q6UXB8|PI16_HUMAN	Peptidase inhibitor 16 OS=Homo sapiens GN=PI16 PE=1 SV=1	HUMAN	1	0.286331					0.337693
727	2	2.03	7.059	5.098	5.098	tr|J3KNF4|J3KNF4_HUMAN	Copper chaperone for superoxide dismutase OS=Homo sapiens GN=CCS PE=4 SV=1	HUMAN	1	0.530465					0.635092
728	2	2.03	7.595	6.013	6.013	tr|H0YBZ2|H0YBZ2_HUMAN	HLA class II histocompatibility antigen gamma chain (Fragment) OS=Homo sapiens GN=CD74 PE=4 SV=1	HUMAN	1	0.618552					0.928937
729	2	2.02	8.03	3.939	2.879	sp|P08253|MMP2_HUMAN	72 kDa type IV collagenase OS=Homo sapiens GN=MMP2 PE=1 SV=2	HUMAN	1	0.846127					0.6777
730	2	2.02	8.051	3.602	3.602	tr|G8JLB6|G8JLB6_HUMAN	Heterogeneous nuclear ribonucleoprotein H OS=Homo sapiens GN=HNRNPH1 PE=4 SV=1	HUMAN	1	0.273302					0.443618
731	2	2.02	15.98	4.098	4.098	sp|Q99426|TBCB_HUMAN	Tubulin-folding cofactor B OS=Homo sapiens GN=TBCB PE=1 SV=2	HUMAN	1	4.55707					4.47107
732	2	2.02	15.12	8.14	8.14	sp|O95989|NUDT3_HUMAN	Diphosphoinositol polyphosphate phosphohydrolase 1 OS=Homo sapiens GN=NUDT3 PE=1 SV=1	HUMAN	1	0.804935					0.679308
733	2	2.02	31.03	9.483	9.483	tr|J3KTI2|J3KTI2_HUMAN	Migration and invasion enhancer 1 OS=Homo sapiens GN=MIEN1 PE=4 SV=1	HUMAN	1	1.01938					0.766601
734	2	2.02	5.894	2.846	2.846	sp|O60784|TOM1_HUMAN	Target of Myb protein 1 OS=Homo sapiens GN=TOM1 PE=1 SV=2	HUMAN	1	0.674735					2.09429
735	2	2.01	13.68	4.701	4.701	tr|J3KQE5|J3KQE5_HUMAN	GTP-binding nuclear protein Ran (Fragment) OS=Homo sapiens GN=RAN PE=4 SV=1	HUMAN	1	1.23045					1.1874
736	2	2.01	20.3	3.881	3.881	sp|Q03405|UPAR_HUMAN	Urokinase plasminogen activator surface receptor OS=Homo sapiens GN=PLAUR PE=1 SV=1	HUMAN	1	1.78266					1.18428
737	2	2.01	16.52	7.826	7.826	tr|E7EPV7|E7EPV7_HUMAN	Alpha-synuclein OS=Homo sapiens GN=SNCA PE=4 SV=1	HUMAN	1	0.559395					0.302081
738	2	2.01	8.865	7.092	4.965	sp|Q07021|C1QBP_HUMAN	Complement component 1 Q subcomponent-binding protein, mitochondrial OS=Homo sapiens GN=C1QBP PE=1 SV=1	HUMAN	1	0.468106					0.624293
739	2	2.01	21.79	14.74	14.74	tr|E9PM92|E9PM92_HUMAN	Protein C11orf58 (Fragment) OS=Homo sapiens GN=C11orf58 PE=4 SV=1	HUMAN	1	0.606224					1.87389
740	2	2.01	7.843	3.922	3.922	sp|Q96N03|VTM2L_HUMAN	V-set and transmembrane domain-containing protein 2-like protein OS=Homo sapiens GN=VSTM2L PE=1 SV=1	HUMAN	1	0.718952					0.907677
741	2	2.01	10.77	6.667	6.667	sp|P55957|BID_HUMAN	BH3-interacting domain death agonist OS=Homo sapiens GN=BID PE=1 SV=1	HUMAN	1	0.155042					0.37841
742	2	2.01	40.51	40.51	40.51	sp|P00995|ISK1_HUMAN	Pancreatic secretory trypsin inhibitor OS=Homo sapiens GN=SPINK1 PE=1 SV=2	HUMAN	2	0.86114					0.599547
743	2	2.01	4.762	3.175	3.175	tr|Q5JNW7|Q5JNW7_HUMAN	Proteasome (Prosome, macropain) subunit beta type 8 (Large multifunctional protease 7) OS=Homo sapiens GN=PSMB8 PE=4 SV=1	HUMAN	1	0.952975					0.578901
744	2	2	9.816	9.816	3.067	tr|D3DU85|D3DU85_HUMAN	Na(+)/H(+) exchange regulatory cofactor NHE-RF2 OS=Homo sapiens GN=SLC9A3R2 PE=4 SV=1	HUMAN	1	1.85441					1.46594
745	2	2	12.02	5.464	5.464	sp|P61081|UBC12_HUMAN	NEDD8-conjugating enzyme Ubc12 OS=Homo sapiens GN=UBE2M PE=1 SV=1	HUMAN	1	0.88079					1.3875
746	2	2	18.13	7.5	7.5	sp|P12724|ECP_HUMAN	Eosinophil cationic protein OS=Homo sapiens GN=RNASE3 PE=1 SV=2	HUMAN	1	1.80783					3.64254
747	2	2	19.15	5.674	5.674	sp|P01036|CYTS_HUMAN	Cystatin-S OS=Homo sapiens GN=CST4 PE=1 SV=3	HUMAN	1	0.394336					0.708256
748	2	2	10.99	9.89	9.89	tr|E9PB55|E9PB55_HUMAN	Homeodomain-only protein OS=Homo sapiens GN=HOPX PE=3 SV=1	HUMAN	1	2.70516					1.09769
749	2	2	7.752	7.752	7.752	sp|Q9NP84|TNR12_HUMAN	Tumor necrosis factor receptor superfamily member 12A OS=Homo sapiens GN=TNFRSF12A PE=1 SV=1	HUMAN	1	1.07578					0.835913
750	2	2	10.98	6.358	6.358	sp|Q96FE7-4|P3IP1_HUMAN	Isoform 4 of Phosphoinositide-3-kinase-interacting protein 1 OS=Homo sapiens GN=PIK3IP1	HUMAN	1	0.376731					0.546983
751	2	2	9.868	7.237	7.237	sp|P62269|RS18_HUMAN	40S ribosomal protein S18 OS=Homo sapiens GN=RPS18 PE=1 SV=3	HUMAN	1	1.14228					3.11245
752	2	2	3.814	3.814	3.814	tr|C9JAF2|C9JAF2_HUMAN	Insulin-like growth factor II Ala-25 Del OS=Homo sapiens GN=IGF2 PE=3 SV=2	HUMAN	1	0.390654					0.0155885
753	2	2	5.556	5.556	5.556	sp|Q9NP99|TREM1_HUMAN	Triggering receptor expressed on myeloid cells 1 OS=Homo sapiens GN=TREM1 PE=1 SV=1	HUMAN	1	0.787062					0.58397
754	2	2	9.434	9.434	9.434	sp|Q9GZP8|IMUP_HUMAN	Immortalization up-regulated protein OS=Homo sapiens GN=IMUP PE=1 SV=1	HUMAN	1	2.69522					1.93899
755	2	2	10.39	10.39	10.39	sp|Q969E1|LEAP2_HUMAN	Liver-expressed antimicrobial peptide 2 OS=Homo sapiens GN=LEAP2 PE=1 SV=1	HUMAN	1	0.837886					0.701938
756	2	2	7.826	7.826	7.826	sp|Q02747|GUC2A_HUMAN	Guanylin OS=Homo sapiens GN=GUCA2A PE=1 SV=2	HUMAN	1	0.35962					0.332479
757	2	2	5.415	5.415	5.415	sp|P16152|CBR1_HUMAN	Carbonyl reductase [NADPH] 1 OS=Homo sapiens GN=CBR1 PE=1 SV=3	HUMAN	1	1.01341					0.855023
758	1.97	2.12	5.968	1.592	0.9284	sp|P11217-2|PYGM_HUMAN	Isoform 2 of Glycogen phosphorylase, muscle form OS=Homo sapiens GN=PYGM	HUMAN	1
759	1.97	2.11	8.414	4.207	2.589	sp|P67775|PP2AA_HUMAN	Serine/threonine-protein phosphatase 2A catalytic subunit alpha isoform OS=Homo sapiens GN=PPP2CA PE=1 SV=1	HUMAN	1	1.94889					1.28509
760	1.96	1.98	9.438	5.393	3.82	tr|C9JGI3|C9JGI3_HUMAN	Thymidine phosphorylase (Fragment) OS=Homo sapiens GN=TYMP PE=4 SV=1	HUMAN	1	0.76544					1.58068
761	1.95	2.07	16.83	6.436	6.436	sp|P54819-3|KAD2_HUMAN	Isoform 3 of Adenylate kinase 2, mitochondrial OS=Homo sapiens GN=AK2	HUMAN	1	1.21772					0.438793
762	1.94	1.96	20.21	8.156	8.156	sp|P82970|HMGN5_HUMAN	High mobility group nucleosome-binding domain-containing protein 5 OS=Homo sapiens GN=HMGN5 PE=1 SV=1	HUMAN	4	0.67803					1.02144
764	1.92	2.59	13.52	11.48	9.016	tr|J3KQY0|J3KQY0_HUMAN	Folate receptor gamma OS=Homo sapiens GN=FOLR3 PE=4 SV=1	HUMAN	2	0.192959					0.167625
765	1.92	2.38	7.399	0.8221	0.4604	tr|E9PGC8|E9PGC8_HUMAN	MAP1A heavy chain OS=Homo sapiens GN=MAP1A PE=4 SV=1	HUMAN	1	1.24592					3.17843
766	1.92	1.93	11.93	6.25	6.25	sp|P31025|LCN1_HUMAN	Lipocalin-1 OS=Homo sapiens GN=LCN1 PE=1 SV=1	HUMAN	1	1.93362					0.70275
767	1.89	2.03	5.145	3.132	2.013	tr|J3KN09|J3KN09_HUMAN	Chitotriosidase-1 OS=Homo sapiens GN=CHIT1 PE=3 SV=1	HUMAN	1	2.77421					2.80988
768	1.89	1.91	9.223	4.854	4.854	sp|P30043|BLVRB_HUMAN	Flavin reductase (NADPH) OS=Homo sapiens GN=BLVRB PE=1 SV=3	HUMAN	1	1.19652					0.501313
769	1.86	1.93	5.484	4.205	3.291	sp|P32942|ICAM3_HUMAN	Intercellular adhesion molecule 3 OS=Homo sapiens GN=ICAM3 PE=1 SV=2	HUMAN	1	0.60968					0.922222
770	1.84	1.9	18.97	3.59	3.59	tr|D6RFW1|D6RFW1_HUMAN	Small glutamine-rich tetratricopeptide repeat-containing protein beta (Fragment) OS=Homo sapiens GN=SGTB PE=4 SV=1	HUMAN	1
771	1.83	1.87	22.45	12.24	12.24	sp|Q99584|S10AD_HUMAN	Protein S100-A13 OS=Homo sapiens GN=S100A13 PE=1 SV=1	HUMAN	1	0.880955					0.569667
772	1.82	2.03	15.54	2.053	2.053	sp|Q9Y376|CAB39_HUMAN	Calcium-binding protein 39 OS=Homo sapiens GN=CAB39 PE=1 SV=1	HUMAN	1	2.62538					3.0558
773	1.82	1.9	14.41	3.493	3.493	tr|G3V141|G3V141_HUMAN	Collagen triple helix repeat containing 1, isoform CRA_c OS=Homo sapiens GN=CTHRC1 PE=4 SV=1	HUMAN	1	1.95913					1.30747
774	1.79	2.08	14.01	4.066	1.958	sp|Q14515|SPRL1_HUMAN	SPARC-like protein 1 OS=Homo sapiens GN=SPARCL1 PE=1 SV=2	HUMAN	1	0.922737	0.781184	17.3659	0.0531351	16.0241	0.847946	0.796558	562.966	0.00150621	477.364
775	1.78	2.48	12.47	3.846	1.632	sp|Q5T0F9|C2D1B_HUMAN	Coiled-coil and C2 domain-containing protein 1B OS=Homo sapiens GN=CC2D1B PE=1 SV=1	HUMAN	2	0.721903					0.823457
776	1.78	2.36	27.68	12.43	4.52	tr|H0YN26|H0YN26_HUMAN	Acidic leucine-rich nuclear phosphoprotein 32 family member A OS=Homo sapiens GN=ANP32A PE=4 SV=1	HUMAN	1	0.841535					0.826996
777	1.78	1.79	12.5	3.804	3.804	sp|Q04760|LGUL_HUMAN	Lactoylglutathione lyase OS=Homo sapiens GN=GLO1 PE=1 SV=4	HUMAN	1	0.855203	0.361957	3.5603	0.240205	3.04478	0.546788	0.412679	333.564	0.00163923	182.389
778	1.77	1.77	18.03	18.03	18.03	tr|E5RJX2|E5RJX2_HUMAN	40S ribosomal protein S20 OS=Homo sapiens GN=RPS20 PE=4 SV=1	HUMAN	1	1.05336					1.63961
779	1.74	2.07	16.43	3.111	0.5065	sp|Q14152|EIF3A_HUMAN	Eukaryotic translation initiation factor 3 subunit A OS=Homo sapiens GN=EIF3A PE=1 SV=1	HUMAN	1	0.873743	0.639548	2.89424	0.30189	2.52883	1.15158	0.611898	2.77255	0.415352	3.19282
780	1.72	1.84	14.06	4.016	4.016	sp|P62753|RS6_HUMAN	40S ribosomal protein S6 OS=Homo sapiens GN=RPS6 PE=1 SV=1	HUMAN	1	0.468533					0.508179
781	1.71	1.93	11.94	3.044	1.639	sp|O75955|FLOT1_HUMAN	Flotillin-1 OS=Homo sapiens GN=FLOT1 PE=1 SV=3	HUMAN	1	0.914634					2.67334
782	1.7	1.77	7.39	3.002	1.617	sp|Q99538|LGMN_HUMAN	Legumain OS=Homo sapiens GN=LGMN PE=1 SV=1	HUMAN	1	1.24959					1.07573
783	1.7	1.7	11.63	9.302	6.512	sp|P61106|RAB14_HUMAN	Ras-related protein Rab-14 OS=Homo sapiens GN=RAB14 PE=1 SV=4	HUMAN	1	0.892995					1.68631
784	1.67	1.92	13.79	6.101	2.122	sp|P16333|NCK1_HUMAN	Cytoplasmic protein NCK1 OS=Homo sapiens GN=NCK1 PE=1 SV=1	HUMAN	1	1.0442					2.19162
785	1.66	1.77	11.29	2.083	1.535	sp|Q92888|ARHG1_HUMAN	Rho guanine nucleotide exchange factor 1 OS=Homo sapiens GN=ARHGEF1 PE=1 SV=2	HUMAN	1	0.927603					1.35023
786	1.65	1.72	8.416	1.155	1.155	tr|E9PFQ7|E9PFQ7_HUMAN	Rho GTPase-activating protein 25 OS=Homo sapiens GN=ARHGAP25 PE=4 SV=1	HUMAN	1	1.56273					2.19754
787	1.64	1.64	7.407	7.407	7.407	sp|Q9HD89|RETN_HUMAN	Resistin OS=Homo sapiens GN=RETN PE=2 SV=1	HUMAN	1	0.101255					0.20796
788	1.62	1.74	23.15	5.145	3.537	sp|P07307|ASGR2_HUMAN	Asialoglycoprotein receptor 2 OS=Homo sapiens GN=ASGR2 PE=1 SV=2	HUMAN	1	0.648761					0.205082
789	1.62	1.7	9.434	7.925	6.038	sp|P55064|AQP5_HUMAN	Aquaporin-5 OS=Homo sapiens GN=AQP5 PE=1 SV=1	HUMAN	1	2.80983					7.07478
790	1.61	1.63	34.83	25.84	17.98	sp|P55774|CCL18_HUMAN	C-C motif chemokine 18 OS=Homo sapiens GN=CCL18 PE=1 SV=1	HUMAN	2	1.63049					0.98499
791	1.6	1.68	10.11	1.991	1.072	sp|P33908|MA1A1_HUMAN	Mannosyl-oligosaccharide 1,2-alpha-mannosidase IA OS=Homo sapiens GN=MAN1A1 PE=1 SV=3	HUMAN	1	0.795067					0.451465
792	1.6	1.62	16.81	7.522	3.097	sp|P22352|GPX3_HUMAN	Glutathione peroxidase 3 OS=Homo sapiens GN=GPX3 PE=1 SV=2	HUMAN	1	1.1197	0.463455	3.59818	0.311186	4.02889	0.376224	0.0651348	3.57974	0.105098	1.34678

## Sheet: BALF with quantification
N	Unused	Total	%Cov	%Cov(50)	%Cov(95)	Accession	Name	Species	Peptides(95%)	115:114	PVal 115:114	Q--value 115:114	EF 115:114	LowerCI 115:114	UpperCI 115:114	116:114	PVal 116:114	Q-value 116:114	EF 116:114	LowerCI 116:114	UpperCI 116:114
3	171.21	171.57	53.24	47.87	41.86	tr|B4E1Z4|B4E1Z4_HUMAN	Complement factor B OS=Homo sapiens GN=CFB PE=2 SV=1	HUMAN	120	1.0198	0.736124	0.305101	1.12424	0.907104	1.14651	0.943722	0.359249	0.198717	1.13484	0.83159	1.07097
4	170.25	170.3	84.38	72.77	63.39	tr|G3V5I3|G3V5I3_HUMAN	Alpha-1-antichymotrypsin OS=Homo sapiens GN=SERPINA3 PE=3 SV=1	HUMAN	236	1.01316	0.9094	0.343225	1.26347	0.801881	1.2801	0.479387	1.41659e-07	1.73987e-06	1.23605	0.387838	0.592547
5	156.68	156.68	63.1	54.46	52.96	sp|P00450|CERU_HUMAN	Ceruloplasmin OS=Homo sapiens GN=CP PE=1 SV=1	HUMAN	116	0.843558	0.0242811	0.032816	1.15818	0.72835	0.97699	0.443946	1.38109e-17	2.54441e-15	1.11925	0.396644	0.496889
7	137.82	137.82	61.98	57.92	53.94	sp|P08603|CFAH_HUMAN	Complement factor H OS=Homo sapiens GN=CFH PE=1 SV=4	HUMAN	104	0.631855	5.64644e-09	1.03449e-07	1.13055	0.558893	0.714341	0.425135	2.31697e-06	2.1343e-05	1.36243	0.312041	0.579218
8	131.49	131.67	52.97	42.11	31.73	sp|Q09666|AHNK_HUMAN	Neuroblast differentiation-associated protein AHNAK OS=Homo sapiens GN=AHNAK PE=1 SV=2	HUMAN	123	0.836164	4.26483e-05	0.000221329	1.08459	0.770952	0.906892	0.543254	1.45746e-18	5.37019e-16	1.10268	0.492665	0.599037
10	117.94	118.11	69.44	61.25	52.69	sp|P06396|GELS_HUMAN	Gelsolin OS=Homo sapiens GN=GSN PE=1 SV=1	HUMAN	96	1.1354	0.187762	0.134336	1.2116	0.937102	1.37565	0.525529	3.96828e-10	1.12474e-08	1.16279	0.451957	0.611077
11	113.6	113.6	73.16	65.8	61.26	sp|P02790|HEMO_HUMAN	Hemopexin OS=Homo sapiens GN=HPX PE=1 SV=2	HUMAN	125	0.301355	2.55329e-15	2.20762e-13	1.18448	0.254419	0.35695	0.272201	2.96435e-13	1.09226e-11	1.24587	0.218483	0.339128
13	108.37	108.7	33.6	27.2	25.51	tr|Q5HY54|Q5HY54_HUMAN	Filamin-A OS=Homo sapiens GN=FLNA PE=2 SV=1	HUMAN	62	1.30876	0.000140771	0.000586259	1.13973	1.14831	1.49163	1.53611	1.20425e-05	7.92358e-05	1.19342	1.28715	1.83322
15	103.62	103.8	60.99	53.53	49.35	sp|P01833|PIGR_HUMAN	Polymeric immunoglobulin receptor OS=Homo sapiens GN=PIGR PE=1 SV=4	HUMAN	106	2.16866	2.47176e-08	3.93816e-07	1.22452	1.77104	2.65556	2.80634	8.26802e-08	1.12832e-06	1.33443	2.10303	3.74486
16	101.44	101.44	82.13	75.47	73.33	sp|P60709|ACTB_HUMAN	Actin, cytoplasmic 1 OS=Homo sapiens GN=ACTB PE=1 SV=1	HUMAN	86	1.44042	0.0318794	0.0398806	1.38971	1.03649	2.00176	1.70952	0.0122548	0.0190674	1.4959	1.1428	2.55727
17	95.18	96	17.21	15.25	12.51	tr|E9PBJ0|E9PBJ0_HUMAN	Mucin-5B OS=Homo sapiens GN=MUC5B PE=4 SV=1	HUMAN	71	2.78802	1.49705e-09	3.44755e-08	1.28978	2.16163	3.59592	7.1207	2.02392e-09	4.143e-08	1.63833	4.34632	11.6661
19	93.03	93.28	38.01	29.08	23.21	sp|P35579|MYH9_HUMAN	Myosin-9 OS=Homo sapiens GN=MYH9 PE=1 SV=4	HUMAN	55	1.2692	4.5736e-05	0.000234056	1.11322	1.14012	1.4129	2.3277	2.54891e-13	1.04353e-11	1.18778	1.9597	2.7648
20	92.26	93.03	37.33	29.82	25.69	tr|B0V2C8|B0V2C8_HUMAN	C4d-A OS=Homo sapiens GN=C4A PE=4 SV=1	HUMAN	54	0.667077	0.000148356	0.000600702	1.21458	0.549226	0.810216	0.491484	1.22736e-13	5.65295e-12	1.13655	0.432434	0.558597
21	88.38	90.08	87.34	75.95	71.73	sp|P02774|VTDB_HUMAN	Vitamin D-binding protein OS=Homo sapiens GN=GC PE=1 SV=1	HUMAN	104	0.515869	3.80155e-09	7.37228e-08	1.18142	0.436652	0.609459	0.423715	0.00408642	0.00860397	1.75924	0.240852	0.745414
22	83.97	107.15	69.35	65.82	61.58	tr|E7ER44|E7ER44_HUMAN	Lactoferroxin-C OS=Homo sapiens GN=LTF PE=4 SV=1	HUMAN	91	1.1528	0.0199782	0.0283125	1.12588	1.02391	1.29792	2.50017	5.71842e-10	1.50502e-08	1.25675	1.98939	3.14208
23	82.85	83.16	33.61	28.58	23.39	tr|E9PE77|E9PE77_HUMAN	Ugl-Y3 OS=Homo sapiens GN=FN1 PE=4 SV=1	HUMAN	47	0.784413	0.00155576	0.00406553	1.15488	0.679214	0.905906	0.559332	0.00026412	0.000954102	1.33888	0.417761	0.748879
24	81.79	81.91	66.55	58.93	50.78	sp|P26038|MOES_HUMAN	Moesin OS=Homo sapiens GN=MSN PE=1 SV=3	HUMAN	51	1.71284	1.8625e-05	0.000118321	1.24392	1.37697	2.13065	1.57054	0.000147736	0.000600702	1.23814	1.26846	1.94456
26	73.53	85.9	22.72	18.89	16.54	sp|P98088|MUC5A_HUMAN	Mucin-5AC (Fragments) OS=Homo sapiens GN=MUC5AC PE=1 SV=3	HUMAN	70	2.04489	1.12818e-05	7.55805e-05	1.32678	1.54124	2.71312	5.01241	1.40171e-09	3.44318e-08	1.49019	3.36361	7.46941
28	65.85	65.97	40.96	34.22	31.66	tr|B7ZKJ8|B7ZKJ8_HUMAN	ITIH4 protein OS=Homo sapiens GN=ITIH4 PE=2 SV=1	HUMAN	52	0.469274	2.13412e-12	6.55287e-11	1.08816	0.431255	0.510644	0.373441	1.11159e-08	1.86173e-07	1.21625	0.307041	0.454199
29	63.82	64.19	63.64	56.46	49.6	tr|E9PKE3|E9PKE3_HUMAN	Heat shock cognate 71 kDa protein OS=Homo sapiens GN=HSPA8 PE=3 SV=1	HUMAN	48	1.78402	0.00672977	0.0118645	1.4538	1.22715	2.5936	1.60044	0.00557359	0.0109237	1.34162	1.19292	2.14717
31	59.44	59.88	67.67	56.03	47.84	sp|P01008|ANT3_HUMAN	Antithrombin-III OS=Homo sapiens GN=SERPINC1 PE=1 SV=1	HUMAN	42	0.164159	1.18206e-15	1.45183e-13	1.20479	0.136255	0.197778	0.143394	1.55979e-14	8.21038e-13	1.25449	0.114304	0.179886
32	59.3	59.81	66.31	55.79	51.5	sp|P08670|VIME_HUMAN	Vimentin OS=Homo sapiens GN=VIM PE=1 SV=4	HUMAN	47	1.01573	0.797371	0.31554	1.13169	0.897532	1.1495	0.768334	0.00141651	0.00378212	1.16385	0.660163	0.894229
33	57.43	57.43	82.31	82.31	70.75	sp|P68871|HBB_HUMAN	Hemoglobin subunit beta OS=Homo sapiens GN=HBB PE=1 SV=2	HUMAN	49	0.36817	0.0123161	0.0190674	2.09585	0.175666	0.771629	0.637537	0.022243	0.0306956	1.45337	0.438662	0.926575
34	57.27	57.48	52.48	47.73	41.53	sp|Q8TDL5|BPIB1_HUMAN	BPI fold-containing family B member 1 OS=Homo sapiens GN=BPIFB1 PE=2 SV=1	HUMAN	40	3.53468	0.000138133	0.000585024	1.53467	2.30322	5.42458	6.14938	2.17019e-05	0.000135531	1.60884	3.82224	9.89337
35	56.1	57.64	17.39	8.464	5.127	sp|Q15149-8|PLEC_HUMAN	Isoform 8 of Plectin OS=Homo sapiens GN=PLEC	HUMAN	27	1.12697	0.236604	0.155124	1.2249	0.920051	1.38043	1.03534	0.664015	0.286493	1.17644	0.880056	1.21801
36	54.76	54.79	53.91	47.05	42.74	sp|P13796|PLSL_HUMAN	Plastin-2 OS=Homo sapiens GN=LCP1 PE=1 SV=6	HUMAN	41	1.18347	0.210818	0.144116	1.31358	0.900952	1.55459	1.01806	0.894635	0.339485	1.32306	0.769472	1.34696
37	54.46	54.55	79.84	75.81	66.13	sp|P06753-2|TPM3_HUMAN	Isoform 2 of Tropomyosin alpha-3 chain OS=Homo sapiens GN=TPM3	HUMAN	36	1.23748	0.0837421	0.078714	1.28253	0.964874	1.5871	1.50121	0.124576	0.101328	1.72648	0.869519	2.59181
38	54.18	54.49	68.79	63.42	63.42	sp|P25311|ZA2G_HUMAN	Zinc-alpha-2-glycoprotein OS=Homo sapiens GN=AZGP1 PE=1 SV=2	HUMAN	67	0.458232	1.29903e-14	7.9774e-13	1.11271	0.411816	0.509878	0.860168	0.0311285	0.0395507	1.14559	0.750851	0.9854
40	52.87	52.92	100	100	94.62	sp|P05109|S10A8_HUMAN	Protein S100-A8 OS=Homo sapiens GN=S100A8 PE=1 SV=1	HUMAN	66	1.58587	1.32025e-06	1.31477e-05	1.13564	1.39645	1.80098	1.88063	0.000156553	0.000627	1.30849	1.43726	2.46078
41	51.73	54.18	47.65	38.02	32.22	sp|P00747|PLMN_HUMAN	Plasminogen OS=Homo sapiens GN=PLG PE=1 SV=2	HUMAN	34	0.34597	1.21073e-12	4.05554e-11	1.16592	0.296735	0.403374	0.295586	2.99571e-15	2.20762e-13	1.14042	0.259191	0.337091
42	50.8	51.27	68.43	57.6	48.85	sp|P06733|ENOA_HUMAN	Alpha-enolase OS=Homo sapiens GN=ENO1 PE=1 SV=2	HUMAN	33	1.51177	0.0338334	0.0414165	1.45703	1.03757	2.20269	2.15989	0.0067195	0.0118645	1.67656	1.28828	3.62119
43	50.38	50.69	54.99	47.08	46.89	sp|P14618|KPYM_HUMAN	Pyruvate kinase isozymes M1/M2 OS=Homo sapiens GN=PKM PE=1 SV=4	HUMAN	34	1.39033	0.0541277	0.0578089	1.39972	0.993289	1.94607	1.29601	0.154606	0.118188	1.44717	0.895549	1.87555
45	49.41	49.45	57.18	54.31	44.5	sp|P36955|PEDF_HUMAN	Pigment epithelium-derived factor OS=Homo sapiens GN=SERPINF1 PE=1 SV=4	HUMAN	30	1.5081	0.00022635	0.000859813	1.19623	1.26071	1.80403	1.11992	0.34527	0.19365	1.28237	0.873317	1.43614
46	47.41	47.81	37.36	31.63	28.55	sp|P02452|CO1A1_HUMAN	Collagen alpha-1(I) chain OS=Homo sapiens GN=COL1A1 PE=1 SV=5	HUMAN	36	1.75277	0.0225542	0.031009	1.5828	1.10739	2.77429	1.29695	0.512711	0.242332	2.39973	0.540458	3.11233
48	46.43	46.47	59.94	59.94	53.6	sp|P02750|A2GL_HUMAN	Leucine-rich alpha-2-glycoprotein OS=Homo sapiens GN=LRG1 PE=1 SV=2	HUMAN	41	0.564026	2.56513e-08	3.93816e-07	1.10324	0.511244	0.622258	0.552172	1.82976e-07	2.17483e-06	1.12937	0.488922	0.623604
49	46.32	64.37	61.95	52.05	43.52	sp|P15311|EZRI_HUMAN	Ezrin OS=Homo sapiens GN=EZR PE=1 SV=4	HUMAN	38	2.15508	1.37797e-07	1.73987e-06	1.229	1.75353	2.64859	2.56752	2.70484e-08	3.98654e-07	1.25729	2.0421	3.22812
50	46.06	46.12	71.08	64.71	60.78	tr|E9PK25|E9PK25_HUMAN	Cofilin-1 OS=Homo sapiens GN=CFL1 PE=4 SV=1	HUMAN	35	1.4627	0.158883	0.118747	1.74461	0.838408	2.55183	1.33188	0.252769	0.160027	1.69236	0.786998	2.25401
51	46.02	46.02	93.86	93.86	86.84	sp|P06702|S10A9_HUMAN	Protein S100-A9 OS=Homo sapiens GN=S100A9 PE=1 SV=1	HUMAN	123	1.51178	0.00289822	0.00665089	1.28141	1.17978	1.93721	2.18899	0.000394949	0.00132295	1.44506	1.5148	3.16322
52	45.27	45.49	71.21	61.3	57.89	sp|P12429|ANXA3_HUMAN	Annexin A3 OS=Homo sapiens GN=ANXA3 PE=1 SV=3	HUMAN	31	0.895409	0.255009	0.160541	1.21942	0.734289	1.09188	2.25171	7.7611e-08	1.09988e-06	1.20389	1.87036	2.71081
53	45.2	45.33	39.51	26.77	22.38	sp|P13671|CO6_HUMAN	Complement component C6 OS=Homo sapiens GN=C6 PE=1 SV=3	HUMAN	26	0.796436	0.00501143	0.0100355	1.16562	0.683271	0.928344	0.67355	7.86497e-06	5.57298e-05	1.16075	0.580271	0.781824
54	45.15	45.39	83.1	79.58	71.13	sp|P69905|HBA_HUMAN	Hemoglobin subunit alpha OS=Homo sapiens GN=HBA1 PE=1 SV=2	HUMAN	51	0.279806	0.000536854	0.00169069	1.59236	0.175717	0.445553	0.358451	0.000253831	0.000926015	1.38627	0.258572	0.49691
55	43.51	44.51	55.97	52.22	48.95	sp|P01042-2|KNG1_HUMAN	Isoform LMW of Kininogen-1 OS=Homo sapiens GN=KNG1	HUMAN	39	0.243902	0.000815318	0.0024424	1.38299	0.176359	0.337314	0.153043	0.000317741	0.00112573	1.3691	0.111784	0.209531
57	42.68	43.04	34.04	22.22	19.84	sp|P18206|VINC_HUMAN	Vinculin OS=Homo sapiens GN=VCL PE=1 SV=4	HUMAN	21	1.77433	3.95744e-06	3.31402e-05	1.21295	1.46281	2.15218	1.10361	0.141257	0.109631	1.14355	0.965072	1.26204
58	41.24	41.24	70.8	65.78	52.8	sp|P07355|ANXA2_HUMAN	Annexin A2 OS=Homo sapiens GN=ANXA2 PE=1 SV=2	HUMAN	25	0.810255	0.00894917	0.0151259	1.16113	0.697815	0.940812	0.968167	0.434701	0.221537	1.08968	0.888483	1.055
59	39.91	40.09	55.11	50.85	43.47	sp|P02760|AMBP_HUMAN	Protein AMBP OS=Homo sapiens GN=AMBP PE=1 SV=1	HUMAN	32	0.392632	5.55276e-05	0.000279824	1.43177	0.274227	0.56216	0.40305	4.02661e-05	0.000215023	1.40257	0.287366	0.565306
62	38.11	38.15	53.33	47.47	36.77	sp|P04217|A1BG_HUMAN	Alpha-1B-glycoprotein OS=Homo sapiens GN=A1BG PE=1 SV=4	HUMAN	27	0.208952	0.0387618	0.0450546	4.10857	0.0508575	0.858492	0.260456	0.0319293	0.0398806	3.08177	0.084515	0.802665
63	37.83	38.02	45.36	33.47	26.23	sp|P07900|HS90A_HUMAN	Heat shock protein HSP 90-alpha OS=Homo sapiens GN=HSP90AA1 PE=1 SV=5	HUMAN	23	1.06237	0.515895	0.243391	1.24937	0.850327	1.32729	1.05284	0.472593	0.23064	1.18589	0.887802	1.24856
65	37.45	37.47	78.5	62.5	54.5	tr|H9KV70|H9KV70_HUMAN	Neutrophil gelatinase-associated lipocalin OS=Homo sapiens GN=LCN2 PE=3 SV=1	HUMAN	48	2.51946	5.61982e-05	0.000279824	1.44248	1.74662	3.63426	5.8228	5.8959e-09	1.03449e-07	1.41657	4.1105	8.24839
66	37.16	38.06	42.91	32.98	28.09	sp|Q9P2E9|RRBP1_HUMAN	Ribosome-binding protein 1 OS=Homo sapiens GN=RRBP1 PE=1 SV=4	HUMAN	27	0.733676	0.0850914	0.078814	1.42915	0.513365	1.04853	1.08382	0.578547	0.260922	1.34841	0.803777	1.46144
69	36.7	36.87	45.11	36.93	33.13	sp|P10909-2|CLUS_HUMAN	Isoform 2 of Clusterin OS=Homo sapiens GN=CLU	HUMAN	34	0.645132	2.74086e-05	0.000163674	1.17046	0.551177	0.755102	0.524335	3.68729e-05	0.000199799	1.26918	0.413128	0.665477
70	36.61	38.82	26.9	19.64	17.04	sp|Q86VB7|C163A_HUMAN	Scavenger receptor cysteine-rich type 1 protein M130 OS=Homo sapiens GN=CD163 PE=1 SV=2	HUMAN	22	1.30564	0.0443714	0.0496937	1.29588	1.00753	1.69195	0.775119	0.00235516	0.00570914	1.16246	0.666791	0.901046
71	36.5	37.39	49.07	39.79	31.13	sp|P01019|ANGT_HUMAN	Angiotensinogen OS=Homo sapiens GN=AGT PE=1 SV=1	HUMAN	26	0.810429	0.207528	0.143187	1.42401	0.569118	1.15406	0.610015	0.000917626	0.00266229	1.24985	0.488072	0.762424
72	36.35	36.38	46.38	43.89	35.16	sp|Q8NBJ4|GOLM1_HUMAN	Golgi membrane protein 1 OS=Homo sapiens GN=GOLM1 PE=1 SV=1	HUMAN	22	1.6936	0.00575804	0.0110501	1.42693	1.18688	2.41665	3.04703	2.20227e-06	2.08065e-05	1.42585	2.13698	4.34462
73	36.09	36.09	66.09	55.36	48.99	sp|P02749|APOH_HUMAN	Beta-2-glycoprotein 1 OS=Homo sapiens GN=APOH PE=1 SV=3	HUMAN	31	0.212378	1.36962e-06	1.32804e-05	1.40445	0.151217	0.298274	0.62851	0.16231	0.120819	1.98542	0.316563	1.24785
74	35.91	35.96	89.87	79.3	73.13	sp|P80723|BASP1_HUMAN	Brain acid soluble protein 1 OS=Homo sapiens GN=BASP1 PE=1 SV=2	HUMAN	28	1.44038	0.0651882	0.0654482	1.48082	0.972693	2.13294	4.28646	6.14126e-05	0.000301711	1.63549	2.62091	7.01045
75	35.61	35.86	44.22	37.4	27.58	tr|E7EPA7|E7EPA7_HUMAN	Transketolase OS=Homo sapiens GN=TKT PE=4 SV=1	HUMAN	23	1.05948	0.581916	0.261481	1.24593	0.850352	1.32004	1.08909	0.361207	0.198941	1.21401	0.8971	1.32217
76	35.19	35.35	67.76	60.9	53.13	sp|P04406|G3P_HUMAN	Glyceraldehyde-3-phosphate dehydrogenase OS=Homo sapiens GN=GAPDH PE=1 SV=3	HUMAN	24	2.01224	0.00479874	0.00971517	1.54037	1.30634	3.09958	2.23939	0.00538165	0.0106107	1.66164	1.3477	3.72106
77	35.01	35.39	43.09	37.62	31.51	sp|P00734|THRB_HUMAN	Prothrombin OS=Homo sapiens GN=F2 PE=1 SV=2	HUMAN	25	0.567473	4.72219e-06	3.86656e-05	1.1781	0.481684	0.668543	0.339575	1.99999e-09	4.143e-08	1.17384	0.289285	0.398607
79	34.49	34.62	51.38	40.16	31.5	sp|P07237|PDIA1_HUMAN	Protein disulfide-isomerase OS=Homo sapiens GN=P4HB PE=1 SV=3	HUMAN	19	0.987161	0.89807	0.340088	1.23427	0.799795	1.21842	1.22439	0.178646	0.130088	1.35676	0.902438	1.6612
80	33.83	33.83	50.47	38.52	31.5	sp|P04040|CATA_HUMAN	Catalase OS=Homo sapiens GN=CAT PE=1 SV=3	HUMAN	21	0.676087	0.0027264	0.0063986	1.26225	0.535622	0.85339	1.09855	0.372028	0.202181	1.24317	0.883667	1.36569
81	33.36	33.42	35.11	28.94	23.49	sp|P10643|CO7_HUMAN	Complement component C7 OS=Homo sapiens GN=C7 PE=1 SV=2	HUMAN	18	1.05116	0.4979	0.237042	1.1636	0.903362	1.22313	0.644924	0.00994056	0.0164988	1.37692	0.468382	0.888008
82	32.87	33.18	41.54	33.68	29.4	sp|Q08380|LG3BP_HUMAN	Galectin-3-binding protein OS=Homo sapiens GN=LGALS3BP PE=1 SV=1	HUMAN	25	1.14087	0.176271	0.129124	1.22358	0.932404	1.39595	0.785161	0.0593247	0.0615746	1.28834	0.609435	1.01156
83	32.45	32.54	46.41	37.57	31.12	tr|E9PGN7|E9PGN7_HUMAN	Plasma protease C1 inhibitor OS=Homo sapiens GN=SERPING1 PE=3 SV=1	HUMAN	20	0.60345	0.00702902	0.0122746	1.40001	0.431031	0.844838	0.329039	1.89167e-07	2.17816e-06	1.23836	0.265705	0.407469
84	31.32	31.52	71.65	66.28	59.39	sp|P00915|CAH1_HUMAN	Carbonic anhydrase 1 OS=Homo sapiens GN=CA1 PE=1 SV=2	HUMAN	21	0.443574	0.0034953	0.00762585	1.58177	0.280429	0.701632	0.685811	0.138469	0.108324	1.69641	0.404272	1.16342
85	30.99	31.12	37.22	32.33	31.02	sp|P05362|ICAM1_HUMAN	Intercellular adhesion molecule 1 OS=Homo sapiens GN=ICAM1 PE=1 SV=2	HUMAN	17	1.1131	0.409212	0.21448	1.32316	0.841244	1.47282	0.841106	0.0499767	0.0543203	1.18887	0.707484	0.999966
86	30.73	30.77	28.99	21.07	18.26	sp|P05164|PERM_HUMAN	Myeloperoxidase OS=Homo sapiens GN=MPO PE=1 SV=1	HUMAN	25	0.5907	0.000994291	0.00284	1.29816	0.45503	0.766821	0.79877	0.0390887	0.0452731	1.23519	0.646678	0.986634
87	30.27	30.53	76.92	76.92	76.92	sp|P11684|UTER_HUMAN	Uteroglobin OS=Homo sapiens GN=SCGB1A1 PE=1 SV=1	HUMAN	46	6.22315	0.00522103	0.0103987	2.84607	2.18658	17.7115	3.80652	0.0106408	0.0171211	2.44706	1.55555	9.31479
89	29.87	34.33	40.55	30.46	27.69	tr|Q6UYC3|Q6UYC3_HUMAN	Lamin A/C OS=Homo sapiens GN=LMNA PE=2 SV=1	HUMAN	18	1.00224	0.975926	0.357814	1.16804	0.858051	1.17066	0.593818	2.91092e-05	0.000167589	1.20709	0.491942	0.716791
90	29.61	29.83	54.08	47.55	46.2	tr|J3KPS3|J3KPS3_HUMAN	Fructose-bisphosphate aldolase OS=Homo sapiens GN=ALDOA PE=3 SV=1	HUMAN	22	1.30251	0.158122	0.118419	1.46833	0.88707	1.91251	1.27618	0.0863776	0.0795674	1.32981	0.959672	1.69708
91	29.13	32.19	47.11	38.44	32.08	sp|P04083|ANXA1_HUMAN	Annexin A1 OS=Homo sapiens GN=ANXA1 PE=1 SV=2	HUMAN	20	1.33809	0.000389543	0.00131681	1.13618	1.17771	1.52031	2.31393	1.44405e-05	9.33469e-05	1.2855	1.80002	2.97456
92	28.92	29.84	15.39	9.681	7.123	sp|Q9Y490|TLN1_HUMAN	Talin-1 OS=Homo sapiens GN=TLN1 PE=1 SV=3	HUMAN	17	0.945303	0.798113	0.31554	1.58466	0.596535	1.49798	0.957102	0.676309	0.28909	1.24538	0.768523	1.19195
93	28.66	29.45	21.54	11.99	9.308	sp|P01031|CO5_HUMAN	Complement C5 OS=Homo sapiens GN=C5 PE=1 SV=4	HUMAN	16	0.660809	0.000110306	0.000482893	1.17827	0.560829	0.778614	0.478142	6.61959e-06	5.09003e-05	1.2465	0.383586	0.596006
94	28.3	28.45	31.12	27.58	26.73	sp|P14780|MMP9_HUMAN	Matrix metalloproteinase-9 OS=Homo sapiens GN=MMP9 PE=1 SV=3	HUMAN	17	1.84281	0.00647287	0.0118405	1.49931	1.22911	2.76295	1.48038	0.03207	0.039921	1.42279	1.04048	2.10627
95	28.03	28.12	97.73	93.18	81.82	sp|P62328|TYB4_HUMAN	Thymosin beta-4 OS=Homo sapiens GN=TMSB4X PE=1 SV=2	HUMAN	30	2.65357	0.00915322	0.0153403	1.67394	1.58523	4.44191	3.17769	0.0510666	0.0553417	3.20925	0.990165	10.198
96	27.86	28.16	61.19	59.09	52.8	sp|P60174|TPIS_HUMAN	Triosephosphate isomerase OS=Homo sapiens GN=TPI1 PE=1 SV=3	HUMAN	18	1.63137	0.000850798	0.00251075	1.26158	1.29312	2.0581	2.68797	2.47117e-06	2.22082e-05	1.26013	2.1331	3.38718
97	27.72	27.9	26.33	21.49	17.05	sp|P02461|CO3A1_HUMAN	Collagen alpha-1(III) chain OS=Homo sapiens GN=COL3A1 PE=1 SV=4	HUMAN	22	1.92351	0.00567328	0.0110183	1.3993	1.37463	2.69158	1.38981	0.00729824	0.0126846	1.19892	1.15923	1.66627
98	27.52	27.89	12.17	8.88	6.428	sp|Q8WXI7|MUC16_HUMAN	Mucin-16 OS=Homo sapiens GN=MUC16 PE=1 SV=2	HUMAN	24	1.4271	0.0495504	0.0541248	1.42601	1.00076	2.03505	2.11481	0.000536783	0.00169069	1.46171	1.4468	3.09124
99	27.48	27.53	81.08	75.68	60.14	sp|P61626|LYSC_HUMAN	Lysozyme C OS=Homo sapiens GN=LYZ PE=1 SV=1	HUMAN	46	4.28626	6.91084e-06	5.19672e-05	1.38613	3.09224	5.94134	14.2674	1.30698e-07	1.7199e-06	1.42707	9.99774	20.3606
100	27.3	41.48	56.27	45.87	35.47	sp|P11021|GRP78_HUMAN	78 kDa glucose-regulated protein OS=Homo sapiens GN=HSPA5 PE=1 SV=2	HUMAN	26	1.32727	0.0556979	0.0588041	1.33757	0.992295	1.77532	1.51346	0.00343129	0.00761629	1.29358	1.16998	1.95778
101	26.85	28.33	67.66	58.71	49.75	sp|P52566|GDIR2_HUMAN	Rho GDP-dissociation inhibitor 2 OS=Homo sapiens GN=ARHGDIB PE=1 SV=3	HUMAN	19	1.52355	0.00217281	0.00533733	1.22278	1.24597	1.86297	2.92898	0.0105583	0.0171211	2.05066	1.42831	6.00634
102	26.58	26.86	84.29	69.29	69.29	sp|P07737|PROF1_HUMAN	Profilin-1 OS=Homo sapiens GN=PFN1 PE=1 SV=2	HUMAN	20	1.93047	0.0172193	0.024979	1.66649	1.15841	3.2171	1.53809	0.0430827	0.0485456	1.51266	1.01682	2.32661
103	26.57	26.72	37.96	34.92	26.9	sp|Q02818|NUCB1_HUMAN	Nucleobindin-1 OS=Homo sapiens GN=NUCB1 PE=1 SV=4	HUMAN	13	1.06221	0.545839	0.251088	1.23754	0.858321	1.31452	1.33785	0.0965545	0.0855212	1.42277	0.940318	1.90346
104	26.41	26.43	74.87	72.73	72.73	tr|H0Y7A7|H0Y7A7_HUMAN	Calmodulin (Fragment) OS=Homo sapiens GN=CALM2 PE=4 SV=1	HUMAN	26	1.20071	0.319634	0.187239	1.49759	0.801763	1.79818	1.12966	0.339476	0.193032	1.32486	0.852667	1.49664
105	26.06	26.06	73.37	61.31	50.25	tr|Q5VY30|Q5VY30_HUMAN	Plasma retinol-binding protein(1-182) OS=Homo sapiens GN=RBP4 PE=2 SV=1	HUMAN	17	0.370415	0.00314038	0.00705557	1.70452	0.217313	0.631381	0.320828	0.000752762	0.00227349	1.60572	0.199804	0.51516
106	26.03	28.14	49.16	45.81	45.53	sp|O14745|NHRF1_HUMAN	Na(+)/H(+) exchange regulatory cofactor NHE-RF1 OS=Homo sapiens GN=SLC9A3R1 PE=1 SV=4	HUMAN	16	1.36937	0.00380785	0.00811013	1.20189	1.13935	1.64583	1.70817	0.10785	0.0935033	1.97061	0.866821	3.36614
107	26	26.25	16.74	11.14	8.866	tr|J3QSU6|J3QSU6_HUMAN	Tenascin OS=Homo sapiens GN=TNC PE=4 SV=1	HUMAN	13	1.37152	0.0276953	0.036576	1.31859	1.04014	1.80848	1.16397	0.195623	0.13782	1.26913	0.917136	1.47724
109	25.59	25.95	37.21	28.98	19.68	sp|P02748|CO9_HUMAN	Complement component C9 OS=Homo sapiens GN=C9 PE=1 SV=2	HUMAN	19	0.908644	0.267877	0.166447	1.19682	0.759213	1.08749	0.745122	0.0118803	0.0188684	1.24166	0.600103	0.925186
110	25	27.17	38.15	34.6	31.61	sp|P02765|FETUA_HUMAN	Alpha-2-HS-glycoprotein OS=Homo sapiens GN=AHSG PE=1 SV=1	HUMAN	20	0.213504	2.29265e-07	2.55987e-06	1.24861	0.170993	0.266583	0.207263	9.47741e-05	0.000420732	1.65835	0.124981	0.343715
111	24.93	25.03	40.53	33.5	30.58	sp|P07339|CATD_HUMAN	Cathepsin D OS=Homo sapiens GN=CTSD PE=1 SV=1	HUMAN	16	1.28954	0.0705555	0.0696974	1.32309	0.974641	1.70619	1.10137	0.408587	0.21448	1.28326	0.858262	1.41334
112	24.88	24.94	52.66	46.75	44.67	sp|P51884|LUM_HUMAN	Lumican OS=Homo sapiens GN=LUM PE=1 SV=2	HUMAN	26	1.1163	0.0552749	0.0586939	1.11973	0.996941	1.24996	0.442524	0.00609235	0.0114705	1.678	0.263721	0.742554
113	24.61	24.68	58.92	47.77	39.49	sp|P10451|OSTP_HUMAN	Osteopontin OS=Homo sapiens GN=SPP1 PE=1 SV=1	HUMAN	20	2.23825	0.00427017	0.00888928	1.58191	1.4149	3.54072	1.00382	0.983386	0.35911	1.51957	0.660599	1.52538
114	24.54	24.66	77.78	70	70	sp|P06703|S10A6_HUMAN	Protein S100-A6 OS=Homo sapiens GN=S100A6 PE=1 SV=1	HUMAN	17	2.18833	0.015034	0.0224271	1.78339	1.22707	3.90264	0.821699	0.464624	0.228637	1.82313	0.450707	1.49807
115	24.12	24.16	71.43	54.62	53.78	sp|P61769|B2MG_HUMAN	Beta-2-microglobulin OS=Homo sapiens GN=B2M PE=1 SV=1	HUMAN	23	1.01322	0.887323	0.337754	1.31168	0.772465	1.32902	1.36412	0.0301598	0.0391295	1.28932	1.05801	1.75879
116	24.09	24.13	32.57	30.67	29.14	sp|P04196|HRG_HUMAN	Histidine-rich glycoprotein OS=Homo sapiens GN=HRG PE=1 SV=1	HUMAN	17	0.343161	4.51764e-07	4.75596e-06	1.20854	0.283946	0.414725	0.165025	3.56794e-05	0.000196217	1.71774	0.096071	0.283471
117	24	24.48	66.48	58.52	53.98	sp|Q9BW30|TPPP3_HUMAN	Tubulin polymerization-promoting protein family member 3 OS=Homo sapiens GN=TPPP3 PE=1 SV=1	HUMAN	15	0.635414	0.000217589	0.000843933	1.21347	0.523635	0.771054	0.581507	0.0101863	0.0168308	1.47696	0.393718	0.858864
118	23.89	23.96	31.16	26.88	21.58	sp|P07357|CO8A_HUMAN	Complement component C8 alpha chain OS=Homo sapiens GN=C8A PE=1 SV=2	HUMAN	13	0.794324	0.00022586	0.000859813	1.09892	0.722819	0.872901	0.400818	2.76912e-06	2.42933e-05	1.25867	0.318444	0.504499
119	23.83	23.83	21.57	18.3	17.32	tr|H3BMA1|H3BMA1_HUMAN	Mesothelin, cleaved form OS=Homo sapiens GN=MSLN PE=4 SV=1	HUMAN	14	1.62973	0.0118498	0.0188684	1.42104	1.14686	2.31592	0.775595	0.0159374	0.0234893	1.21427	0.638733	0.941782
120	23.64	23.93	28.98	22.39	17.12	sp|P19827|ITIH1_HUMAN	Inter-alpha-trypsin inhibitor heavy chain H1 OS=Homo sapiens GN=ITIH1 PE=1 SV=3	HUMAN	14	0.57702	9.7932e-07	1.00234e-05	1.13257	0.509477	0.653516	0.460318	3.32109e-05	0.000188262	1.28969	0.356921	0.593669
121	23.1	23.39	31.52	23.8	19.02	sp|Q32MZ4-3|LRRF1_HUMAN	Isoform 3 of Leucine-rich repeat flightless-interacting protein 1 OS=Homo sapiens GN=LRRFIP1	HUMAN	13	0.79538	0.0518418	0.056017	1.26	0.631253	1.00218	1.07277	0.512992	0.242332	1.25698	0.853454	1.34845
122	22.96	23.25	31.6	24.08	22.54	tr|F5H5D3|F5H5D3_HUMAN	Tubulin alpha-1C chain OS=Homo sapiens GN=TUBA1C PE=3 SV=1	HUMAN	14	0.783432	0.350702	0.195975	1.90004	0.412324	1.48855	0.627159	0.0120843	0.0190476	1.3461	0.465907	0.844221
123	22.93	23.18	15.11	10.3	7.692	sp|P22897|MRC1_HUMAN	Macrophage mannose receptor 1 OS=Homo sapiens GN=MRC1 PE=1 SV=1	HUMAN	13	0.867625	0.0798871	0.0762577	1.17522	0.738268	1.01965	0.494021	8.96121e-06	6.22996e-05	1.24202	0.397758	0.613582
124	22.88	23.14	72.79	72.79	72.79	sp|P02766|TTHY_HUMAN	Transthyretin OS=Homo sapiens GN=TTR PE=1 SV=1	HUMAN	17	0.140427	0.00432452	0.00895184	1.74595	0.0804302	0.245178	0.292581	0.0308187	0.0395507	2.58704	0.113095	0.756918
125	22.86	22.89	44.33	37.73	32.19	sp|P30740|ILEU_HUMAN	Leukocyte elastase inhibitor OS=Homo sapiens GN=SERPINB1 PE=1 SV=1	HUMAN	14	1.55054	0.000247804	0.000922291	1.19293	1.29977	1.84969	1.22088	0.0631664	0.0644035	1.23712	0.986874	1.51038
126	22.79	22.81	35.77	29.5	26.99	sp|P04004|VTNC_HUMAN	Vitronectin OS=Homo sapiens GN=VTN PE=1 SV=1	HUMAN	16	0.389463	0.000125002	0.000535567	1.39541	0.279102	0.543462	0.302758	2.87681e-05	0.000167589	1.38418	0.218727	0.419073
127	22.74	23.98	25.44	21.55	18.34	sp|O00391|QSOX1_HUMAN	Sulfhydryl oxidase 1 OS=Homo sapiens GN=QSOX1 PE=1 SV=3	HUMAN	15	2.25045	0.000177721	0.000696634	1.33028	1.69171	2.99374	1.17885	0.0317769	0.0398806	1.15733	1.01859	1.36431
128	22.56	22.56	48.44	42.19	42.19	sp|Q96KK5|H2A1H_HUMAN	Histone H2A type 1-H OS=Homo sapiens GN=HIST1H2AH PE=1 SV=3	HUMAN	21	0.704686	0.667985	0.287533	10.4914	0.0671682	7.39312	1.0442	0.97704	0.357814	81.9174	0.012747	85.5385
129	22.55	22.55	70.2	54.69	46.12	sp|P63104|1433Z_HUMAN	14-3-3 protein zeta/delta OS=Homo sapiens GN=YWHAZ PE=1 SV=1	HUMAN	19	0.923055	0.784605	0.314019	2.34595	0.393468	2.16544	1.09268	0.522425	0.244282	1.47784	0.739379	1.61481
130	22.13	23.04	58.85	50	40.27	sp|P16401|H15_HUMAN	Histone H1.5 OS=Homo sapiens GN=HIST1H1B PE=1 SV=3	HUMAN	15	1.12114	0.752917	0.30859	3.91351	0.286479	4.38759	2.73391	0.0304782	0.0394039	2.16694	1.26165	5.9242
131	22.01	22.01	50	48.8	48.8	sp|P29966|MARCS_HUMAN	Myristoylated alanine-rich C-kinase substrate OS=Homo sapiens GN=MARCKS PE=1 SV=4	HUMAN	12	1.38919	0.0673501	0.0668896	1.4376	0.966322	1.9971	2.81592	0.000900258	0.00263263	1.46046	1.92811	4.11255
132	21.76	21.79	40.29	38.13	25.9	sp|P27797|CALR_HUMAN	Calreticulin OS=Homo sapiens GN=CALR PE=1 SV=1	HUMAN	13	1.13008	0.407964	0.21448	1.36731	0.826498	1.54516	1.07382	0.532355	0.247146	1.27526	0.842036	1.3694
133	21.7	24.67	47.19	41.99	33.33	sp|P68104|EF1A1_HUMAN	Elongation factor 1-alpha 1 OS=Homo sapiens GN=EEF1A1 PE=1 SV=1	HUMAN	16	1.27333	0.306706	0.182274	1.67925	0.758274	2.13824	0.923	0.686437	0.291267	1.56863	0.588413	1.44784
134	21.49	23.56	28.02	19.04	13.48	tr|Q5T985|Q5T985_HUMAN	Inter-alpha (Globulin) inhibitor H2 OS=Homo sapiens GN=ITIH2 PE=2 SV=1	HUMAN	12	0.627248	0.00195996	0.00487954	1.2773	0.491072	0.801186	0.384825	6.63083e-06	5.09003e-05	1.26204	0.304922	0.485665
135	21.47	21.77	25.59	20.43	15.48	tr|B7TY16|B7TY16_HUMAN	Actinin alpha 1 isoform 3 OS=Homo sapiens GN=ACTN1 PE=2 SV=1	HUMAN	12	1.02458	0.825375	0.32182	1.29406	0.791756	1.32586	1.14719	0.352115	0.195984	1.39536	0.822143	1.60074
137	21.02	22.61	37.26	36.26	25.49	sp|Q9UGM3|DMBT1_HUMAN	Deleted in malignant brain tumors 1 protein OS=Homo sapiens GN=DMBT1 PE=1 SV=2	HUMAN	24	1.99285	0.00671191	0.0118645	1.55021	1.28554	3.08935	8.42263	0.000461453	0.00149148	2.37291	3.54949	19.9862
138	20.97	20.97	65.24	63.1	53.48	sp|P30086|PEBP1_HUMAN	Phosphatidylethanolamine-binding protein 1 OS=Homo sapiens GN=PEBP1 PE=1 SV=3	HUMAN	12	0.999611	0.998395	0.363869	1.61589	0.618615	1.61526	0.737201	0.105943	0.0922841	1.48875	0.49518	1.09751
139	20.94	21.19	48.68	32.13	26.38	sp|P00558|PGK1_HUMAN	Phosphoglycerate kinase 1 OS=Homo sapiens GN=PGK1 PE=1 SV=3	HUMAN	12	1.72633	0.000405886	0.00134733	1.24252	1.38938	2.145	1.97281	0.00180336	0.00458256	1.40796	1.40118	2.77765
140	20.93	20.96	60.27	49.32	43.15	sp|P01034|CYTC_HUMAN	Cystatin-C OS=Homo sapiens GN=CST3 PE=1 SV=1	HUMAN	16	0.942087	0.613013	0.271156	1.30552	0.721621	1.22991	1.1576	0.359722	0.198717	1.42358	0.813163	1.64794
141	20.79	20.87	59.06	46.85	42.52	sp|P18669|PGAM1_HUMAN	Phosphoglycerate mutase 1 OS=Homo sapiens GN=PGAM1 PE=1 SV=2	HUMAN	11	1.41673	0.0213811	0.029955	1.32762	1.06712	1.88087	0.991385	0.934019	0.348994	1.25846	0.787776	1.24762
142	20.62	20.63	93.46	93.46	82.35	sp|P00441|SODC_HUMAN	Superoxide dismutase [Cu-Zn] OS=Homo sapiens GN=SOD1 PE=1 SV=?		15	0.948629	0.747869	0.307547	1.44119	0.658226	1.36716	1.04561	0.687218	0.291267	1.27929	0.817339	1.33765
143	20.57	20.59	36.87	32.74	31.27	sp|P07858|CATB_HUMAN	Cathepsin B OS=Homo sapiens GN=CTSB PE=1 SV=3	HUMAN	14	1.05101	0.870715	0.3335	2.00763	0.523506	2.11004	1.31746	0.209302	0.143803	1.60259	0.82208	2.11134
144	20.51	20.98	26.2	15.63	12.82	sp|P19338|NUCL_HUMAN	Nucleolin OS=Homo sapiens GN=NCL PE=1 SV=3	HUMAN	11	0.888539	0.367443	0.200577	1.31882	0.673739	1.17182	0.977741	0.889926	0.338047	1.4188	0.689134	1.38721
145	19.98	22.18	45	35.31	32.19	sp|P08758|ANXA5_HUMAN	Annexin A5 OS=Homo sapiens GN=ANXA5 PE=1 SV=2	HUMAN	13	0.447017	0.000111398	0.000482893	1.2085	0.369895	0.54022	1.84643	0.000429515	0.00141304	1.21093	1.5248	2.2359
146	19.87	19.94	55.56	48.61	45.83	sp|P23284|PPIB_HUMAN	Peptidyl-prolyl cis-trans isomerase B OS=Homo sapiens GN=PPIB PE=1 SV=2	HUMAN	12	1.59973	0.00762704	0.0131322	1.3233	1.2089	2.11692	4.36062	9.73239e-06	6.64079e-05	1.23416	3.53327	5.3817
147	19.75	20.33	44.34	31.08	22.41	sp|P05543|THBG_HUMAN	Thyroxine-binding globulin OS=Homo sapiens GN=SERPINA7 PE=1 SV=2	HUMAN	15	0.692634	0.0257249	0.034343	1.36536	0.50729	0.945695	0.746202	0.011856	0.0188684	1.23448	0.604469	0.921168
148	19.73	19.96	41.89	33.68	21.68	sp|Q01518|CAP1_HUMAN	Adenylyl cyclase-associated protein 1 OS=Homo sapiens GN=CAP1 PE=1 SV=5	HUMAN	11	1.58887	0.0318665	0.0398806	1.51526	1.04858	2.40755	2.11433	0.00199303	0.00492859	1.51433	1.39621	3.2018
150	19.08	19.1	65.91	56.06	50	sp|P03973|SLPI_HUMAN	Antileukoproteinase OS=Homo sapiens GN=SLPI PE=1 SV=2	HUMAN	16	4.62122	2.75408e-05	0.000163674	1.4567	3.1724	6.73172	5.48797	0.0141328	0.0212548	3.45706	1.58747	18.9722
151	19	19	60.85	52.91	47.62	sp|Q13938|CAYP1_HUMAN	Calcyphosin OS=Homo sapiens GN=CAPS PE=1 SV=1	HUMAN	14	0.909001	0.200847	0.140304	1.17329	0.774745	1.06652	0.631095	0.00185836	0.00468998	1.2517	0.504192	0.789939
152	18.93	19.24	33.33	21.47	15.47	tr|G5E9D3|G5E9D3_HUMAN	Calpastatin OS=Homo sapiens GN=CAST PE=4 SV=1	HUMAN	11	1.05712	0.690138	0.291952	1.35192	0.78194	1.42914	2.11717	0.010413	0.0171211	1.70114	1.24456	3.6016
153	18.93	19.02	21.93	19.58	16.45	tr|H0YB57|H0YB57_HUMAN	Pulmonary surfactant-associated protein B (Fragment) OS=Homo sapiens GN=SFTPB PE=4 SV=1	HUMAN	12	2.43184	0.0015898	0.00412524	1.29178	1.88255	3.14141	0.504623	0.0229547	0.0314423	1.65631	0.304668	0.835811
154	18.83	20.7	29.5	22.99	19.31	sp|P31146|COR1A_HUMAN	Coronin-1A OS=Homo sapiens GN=CORO1A PE=1 SV=4	HUMAN	10	1.20223	0.43585	0.221816	1.69402	0.709691	2.03661	2.42942	0.000549881	0.00171704	1.42006	1.71078	3.44993
156	18.72	18.79	60.14	44.59	44.59	tr|J3KMY5|J3KMY5_HUMAN	Epididymal secretory protein E1 OS=Homo sapiens GN=NPC2 PE=4 SV=1	HUMAN	14	1.14024	0.580771	0.261285	1.67902	0.679109	1.91449	1.09068	0.7559	0.309468	1.84518	0.591094	2.0125
157	18.69	18.69	51.76	41.21	41.21	sp|Q06830|PRDX1_HUMAN	Peroxiredoxin-1 OS=Homo sapiens GN=PRDX1 PE=1 SV=1	HUMAN	12	1.04041	0.795931	0.31554	1.41721	0.734125	1.47447	0.655174	0.0243139	0.032816	1.41848	0.461885	0.92935
158	18.5	18.5	57.92	55.83	50	sp|P51858|HDGF_HUMAN	Hepatoma-derived growth factor OS=Homo sapiens GN=HDGF PE=1 SV=1	HUMAN	11	0.827441	0.400483	0.212934	1.63546	0.505939	1.35324	1.26826	0.142981	0.110679	1.4013	0.905062	1.77721
159	18.26	18.28	32.1	27.84	23.15	sp|Q96NY7|CLIC6_HUMAN	Chloride intracellular channel protein 6 OS=Homo sapiens GN=CLIC6 PE=2 SV=3	HUMAN	12	1.6978	0.0186201	0.0268	1.46767	1.1568	2.4918	4.08095	0.0105248	0.0171211	2.36449	1.72593	9.64937
161	18	18	37.92	35.78	33.94	tr|B4DU58|B4DU58_HUMAN	Macrophage-capping protein OS=Homo sapiens GN=CAPG PE=2 SV=1	HUMAN	11	1.65768	0.0539829	0.0578089	1.67509	0.989605	2.77676	1.51076	0.0556885	0.0588041	1.52917	0.98796	2.31021
162	17.81	17.85	19.47	17.13	13.91	tr|G8JLA8|G8JLA8_HUMAN	Transforming growth factor-beta-induced protein ig-h3 OS=Homo sapiens GN=TGFBI PE=4 SV=1	HUMAN	9	1.68835	0.00377508	0.00811013	1.35791	1.24335	2.29262	1.1535	0.247709	0.157637	1.29865	0.888235	1.49799
163	17.73	19.13	50.45	38.58	29.08	sp|P37837|TALDO_HUMAN	Transaldolase OS=Homo sapiens GN=TALDO1 PE=1 SV=2	HUMAN	10	1.05364	0.51981	0.243682	1.18734	0.887401	1.25103	1.36358	0.0537209	0.0577089	1.37158	0.994165	1.87026
164	17.69	19.68	60.78	47.55	45.1	sp|P52565|GDIR1_HUMAN	Rho GDP-dissociation inhibitor 1 OS=Homo sapiens GN=ARHGDIA PE=1 SV=3	HUMAN	18	1.37186	0.254662	0.160541	1.93581	0.708673	2.65567	1.0453	0.904223	0.342067	2.61095	0.40035	2.72922
166	17.49	17.61	58.41	42.77	40.12	sp|P33241|LSP1_HUMAN	Lymphocyte-specific protein 1 OS=Homo sapiens GN=LSP1 PE=1 SV=1	HUMAN	13	1.05457	0.703921	0.296083	1.36484	0.772672	1.43932	1.67788	0.0373938	0.044446	1.61424	1.03942	2.70849
167	17.47	17.55	43.95	36.29	33.87	sp|Q8IWL1|SFPA2_HUMAN	Pulmonary surfactant-associated protein A2 OS=Homo sapiens GN=SFTPA2 PE=1 SV=1	HUMAN	20	0.426114	0.00034212	0.00120056	1.23172	0.34595	0.524855	0.868243	0.529241	0.24622	1.7683	0.491005	1.53531
168	17.47	17.47	54.37	50.49	49.51	sp|P62805|H4_HUMAN	Histone H4 OS=Homo sapiens GN=HIST1H4A PE=1 SV=2	HUMAN	16	0.502341	0.0398687	0.0456216	1.89018	0.265763	0.949517	0.784868	0.27634	0.170338	1.7056	0.460171	1.33867
170	17.14	19.24	59.79	54.5	51.32	sp|Q99497|PARK7_HUMAN	Protein DJ-1 OS=Homo sapiens GN=PARK7 PE=1 SV=2	HUMAN	15	1.54461	0.128719	0.103481	1.8493	0.835241	2.85644	1.54869	0.0759073	0.0734461	1.65481	0.935872	2.56279
171	17.13	17.18	57.94	52.38	38.1	sp|P62807|H2B1C_HUMAN	Histone H2B type 1-C/E/F/G/I OS=Homo sapiens GN=HIST1H2BC PE=1 SV=4	HUMAN	13	0.635335	0.00650804	0.0118405	1.33834	0.474719	0.850295	1.32023	0.182064	0.131537	1.54427	0.854922	2.03879
172	16.98	19.39	63.41	48.78	45.12	sp|P62937|PPIA_HUMAN	Peptidyl-prolyl cis-trans isomerase A OS=Homo sapiens GN=PPIA PE=1 SV=?		12	1.96094	0.00652334	0.0118405	1.53084	1.28096	3.00188	2.93192	0.00105932	0.00300246	1.6431	1.78439	4.81743
173	16.24	16.26	70.18	55.26	55.26	sp|P08118|MSMB_HUMAN	Beta-microseminoprotein OS=Homo sapiens GN=MSMB PE=1 SV=1	HUMAN	18	8.36485	0.000237335	0.00089234	2.26663	3.69044	18.96	14.969	6.43931e-05	0.000308194	2.40236	6.23096	35.9611
176	15.73	16.26	21.8	14.16	8.652	sp|Q06033|ITIH3_HUMAN	Inter-alpha-trypsin inhibitor heavy chain H3 OS=Homo sapiens GN=ITIH3 PE=1 SV=2	HUMAN	13	0.972085	0.767347	0.313111	1.2508	0.77717	1.21588	0.497871	0.00293678	0.00667961	1.42473	0.34945	0.70933
177	15.63	15.73	59.46	48.65	48.65	sp|P07108-5|ACBP_HUMAN	Isoform 5 of Acyl-CoA-binding protein OS=Homo sapiens GN=DBI	HUMAN	11	1.83528	7.76137e-06	5.57298e-05	1.14838	1.59814	2.10759	2.04286	0.000169303	0.000670775	1.28348	1.59166	2.62197
178	15.61	15.66	33.64	30.37	30.37	sp|P30044|PRDX5_HUMAN	Peroxiredoxin-5, mitochondrial OS=Homo sapiens GN=PRDX5 PE=1 SV=4	HUMAN	10	1.21512	0.571672	0.258137	2.66286	0.456323	3.2357	0.688793	0.0245428	0.0330041	1.32587	0.519504	0.913246
179	15.53	16.51	26.34	18.81	17.23	sp|P30101|PDIA3_HUMAN	Protein disulfide-isomerase A3 OS=Homo sapiens GN=PDIA3 PE=1 SV=4	HUMAN	10	1.40213	0.0011078	0.0030923	1.17018	1.19822	1.64075	1.33271	0.1307	0.104238	1.4819	0.899323	1.97495
180	15.5	51.58	60.37	50.08	35.57	sp|P08107|HSP71_HUMAN	Heat shock 70 kDa protein 1A/1B OS=Homo sapiens GN=HSPA1A PE=1 SV=5	HUMAN	38	1.40439	0.0949178	0.0848877	1.5161	0.926319	2.1292	1.39578	0.124852	0.101329	1.57213	0.887825	2.19434
181	15.41	15.53	30.12	23.7	21.48	sp|P08185|CBG_HUMAN	Corticosteroid-binding globulin OS=Homo sapiens GN=SERPINA6 PE=1 SV=1	HUMAN	11	0.56562	0.0281259	0.0368803	1.61428	0.350385	0.913068	0.505569	0.00812396	0.0138582	1.51137	0.33451	0.764101
182	15.14	18.46	42.96	41.48	29.26	sp|P36980|FHR2_HUMAN	Complement factor H-related protein 2 OS=Homo sapiens GN=CFHR2 PE=1 SV=1	HUMAN	10	0.44725	0.00272359	0.0063986	1.45703	0.30696	0.651657	0.300337	0.00145029	0.00381874	1.62987	0.18427	0.489512
183	15.03	15.08	69.8	55.7	30.2	sp|P16949|STMN1_HUMAN	Stathmin OS=Homo sapiens GN=STMN1 PE=1 SV=3	HUMAN	8	1.20089	0.0309391	0.0395507	1.17648	1.02075	1.41283	1.13129	0.119289	0.0985504	1.17508	0.962735	1.32935
184	14.96	15.2	33.57	20.56	12.3	sp|P06744-2|G6PI_HUMAN	Isoform 2 of Glucose-6-phosphate isomerase OS=Homo sapiens GN=GPI	HUMAN	9	1.63924	0.026067	0.0346742	1.51536	1.08175	2.48403	1.1766	0.225764	0.150972	1.33584	0.88079	1.57175
185	14.93	15.04	19.43	13.69	13.69	sp|P50895|BCAM_HUMAN	Basal cell adhesion molecule OS=Homo sapiens GN=BCAM PE=1 SV=2	HUMAN	9	0.51711	0.00657495	0.0118645	1.48661	0.347845	0.768741	0.467059	0.0200879	0.0283588	1.81018	0.258018	0.845463
186	14.89	14.96	51.9	50	50	sp|P09211|GSTP1_HUMAN	Glutathione S-transferase P OS=Homo sapiens GN=GSTP1 PE=1 SV=2	HUMAN	8	1.09118	0.55833	0.254603	1.46204	0.74634	1.59534	0.545757	0.000741175	0.00225699	1.19793	0.455583	0.653779
187	14.81	18.18	46.67	37.65	31.76	sp|P62258|1433E_HUMAN	14-3-3 protein epsilon OS=Homo sapiens GN=YWHAE PE=1 SV=1	HUMAN	14	0.917977	0.823021	0.321583	2.54356	0.360903	2.33493	0.96232	0.706922	0.296446	1.28145	0.750963	1.23316
188	14.66	14.66	47.32	33.12	30.6	sp|P02649|APOE_HUMAN	Apolipoprotein E OS=Homo sapiens GN=APOE PE=1 SV=1	HUMAN	11	0.438634	0.000368766	0.0012597	1.35626	0.323415	0.5949	0.541486	0.00145095	0.00381874	1.33147	0.406683	0.720973
189	14.54	14.54	67.54	67.54	67.54	sp|O75368|SH3L1_HUMAN	SH3 domain-binding glutamic acid-rich-like protein OS=Homo sapiens GN=SH3BGRL PE=1 SV=1	HUMAN	10	1.47526	0.000286648	0.00102543	1.14795	1.28512	1.69353	1.7591	0.00331392	0.00740035	1.35847	1.29491	2.38968
191	14.48	14.6	27.53	21.82	21.82	sp|Q01459|DIAC_HUMAN	Di-N-acetylchitobiase OS=Homo sapiens GN=CTBS PE=1 SV=1	HUMAN	8	0.813452	0.0664565	0.0662943	1.25214	0.649651	1.01855	1.28479	0.00915928	0.0153403	1.18087	1.08801	1.51717
192	14.42	16.12	34.87	24.36	17.44	sp|P29508|SPB3_HUMAN	Serpin B3 OS=Homo sapiens GN=SERPINB3 PE=1 SV=2	HUMAN	9	2.00313	0.0156952	0.023319	1.66467	1.20332	3.33456	0.953905	0.682503	0.29039	1.30842	0.729054	1.2481
193	14.28	14.32	25.64	20.55	18.01	sp|Q13228|SBP1_HUMAN	Selenium-binding protein 1 OS=Homo sapiens GN=SELENBP1 PE=1 SV=2	HUMAN	7	0.766993	0.00232305	0.0056686	1.14422	0.670321	0.877608	0.517055	7.68753e-06	5.57298e-05	1.14309	0.452332	0.591038
194	14.27	14.39	28.18	21.92	19.57	sp|P04745|AMY1_HUMAN	Alpha-amylase 1 OS=Homo sapiens GN=AMY1A PE=1 SV=2	HUMAN	12	1.00469	0.94692	0.351905	1.17015	0.858602	1.17564	1.0506	0.761609	0.311459	1.43702	0.731096	1.50972
196	14.07	14.11	26.5	18.93	18.93	sp|Q15113|PCOC1_HUMAN	Procollagen C-endopeptidase enhancer 1 OS=Homo sapiens GN=PCOLCE PE=1 SV=2	HUMAN	8	1.50602	0.106532	0.0925785	1.6956	0.888193	2.55359	0.848926	0.398715	0.212608	1.55461	0.546072	1.31974
197	14	14.08	13.95	9.754	8.204	tr|H3BU97|H3BU97_HUMAN	Apolipoprotein B receptor OS=Homo sapiens GN=APOBR PE=4 SV=1	HUMAN	7	0.718085	0.131474	0.104629	1.62571	0.441706	1.1674	1.07138	0.650952	0.282179	1.47997	0.723917	1.58561
198	13.79	14.14	23.22	20.16	15.89	sp|P08697|A2AP_HUMAN	Alpha-2-antiplasmin OS=Homo sapiens GN=SERPINF2 PE=1 SV=3	HUMAN	11	0.37728	0.0019471	0.00487954	1.52607	0.247224	0.575754	0.454302	0.00174356	0.00446139	1.39626	0.325371	0.634324
199	13.76	13.79	69.85	56.62	36.76	sp|P68431|H31_HUMAN	Histone H3.1 OS=Homo sapiens GN=HIST1H3A PE=1 SV=2	HUMAN	10	0.704219	0.292137	0.177627	2.15099	0.327394	1.51477	1.28483	0.459915	0.228421	2.23727	0.574284	2.87451
200	13.74	13.76	94.56	87.99	61.73	tr|F5H7K6|F5H7K6_HUMAN	Polyubiquitin-C OS=Homo sapiens GN=UBC PE=4 SV=1	HUMAN	13	1.6465	0.0618733	0.0635043	1.70099	0.967965	2.80068	0.977133	0.877063	0.33454	1.40633	0.694811	1.37417
201	13.37	13.76	46.43	46.43	38.84	tr|F8W7I2|F8W7I2_HUMAN	Prostaglandin-H2 D-isomerase OS=Homo sapiens GN=PTGDS PE=3 SV=1	HUMAN	9	0.662988	0.000947352	0.00272707	1.1642	0.569478	0.771852	0.495005	7.21206e-05	0.00034069	1.16322	0.425547	0.575799
202	13.25	17.9	22.53	16.04	12.63	sp|P20700|LMNB1_HUMAN	Lamin-B1 OS=Homo sapiens GN=LMNB1 PE=1 SV=2	HUMAN	10	0.823506	0.240692	0.156333	1.43082	0.575547	1.17829	1.02601	0.867006	0.333118	1.41855	0.723282	1.45546
203	13.25	13.35	72.22	59.26	51.85	sp|O75347|TBCA_HUMAN	Tubulin-specific chaperone A OS=Homo sapiens GN=TBCA PE=1 SV=3	HUMAN	9	1.47017	0.0458656	0.0510567	1.45659	1.00932	2.14143	1.07846	0.422615	0.218344	1.23339	0.874384	1.33017
204	13.23	13.23	68.89	58.89	51.11	sp|P05204|HMGN2_HUMAN	Non-histone chromosomal protein HMG-17 OS=Homo sapiens GN=HMGN2 PE=1 SV=3	HUMAN	7	1.27828	0.320627	0.187523	1.77315	0.720911	2.26658	3.27273	0.00580719	0.0110867	1.9382	1.68854	6.34321
205	13.18	14.64	27.56	22.1	19.59	tr|Q14UF6|Q14UF6_HUMAN	Complement decay-accelerating factor OS=Homo sapiens GN=DAF PE=2 SV=1	HUMAN	9	0.776548	0.0186058	0.0268	1.20862	0.642507	0.938553	0.754353	0.0105008	0.0171211	1.19958	0.628849	0.904903
206	13.11	13.13	47.18	38.73	33.8	sp|Q14019|COTL1_HUMAN	Coactosin-like protein OS=Homo sapiens GN=COTL1 PE=1 SV=3	HUMAN	9	1.99876	3.6021e-06	3.08661e-05	1.15314	1.73331	2.30485	2.42449	8.09599e-05	0.000372884	1.32096	1.83541	3.20265
207	13.04	13.12	35.14	25.68	19.82	sp|P09210|GSTA2_HUMAN	Glutathione S-transferase A2 OS=Homo sapiens GN=GSTA2 PE=1 SV=4	HUMAN	6	1.43446	0.0327498	0.0404519	1.38099	1.03872	1.98096	0.923092	0.724463	0.301625	1.65762	0.556879	1.53013
208	12.98	13.29	10.08	5.458	4.059	sp|O75882|ATRN_HUMAN	Attractin OS=Homo sapiens GN=ATRN PE=1 SV=2	HUMAN	7	0.58888	0.000251947	0.000926015	1.21665	0.484018	0.716461	0.814205	0.193685	0.137003	1.3966	0.58299	1.13712
209	12.84	15.52	24.81	17.94	16.79	sp|P05186|PPBT_HUMAN	Alkaline phosphatase, tissue-nonspecific isozyme OS=Homo sapiens GN=ALPL PE=1 SV=4	HUMAN	9	1.01123	0.958629	0.354283	1.65752	0.610085	1.67614	1.08388	0.641221	0.278616	1.49462	0.725188	1.62
210	12.56	12.65	29.46	22.77	18.75	sp|P30041|PRDX6_HUMAN	Peroxiredoxin-6 OS=Homo sapiens GN=PRDX6 PE=1 SV=3	HUMAN	8	1.05318	0.79581	0.31554	1.59778	0.65915	1.68274	0.634976	0.000497004	0.00159242	1.17766	0.539183	0.747788
211	12.42	12.48	54.86	40	36.57	sp|P02792|FRIL_HUMAN	Ferritin light chain OS=Homo sapiens GN=FTL PE=1 SV=2	HUMAN	7	0.75267	0.00439125	0.00903488	1.16965	0.643499	0.880361	0.366556	2.60872e-05	0.000160203	1.23827	0.296023	0.453894
212	12.4	12.43	24.79	21.27	13.07	sp|P04003|C4BPA_HUMAN	C4b-binding protein alpha chain OS=Homo sapiens GN=C4BPA PE=1 SV=2	HUMAN	9	0.0910268	4.2175e-05	0.000221329	1.87512	0.0485445	0.170686	0.201287	0.000603277	0.00185238	1.90265	0.105793	0.38298
213	12.22	12.25	14.01	12.75	11.48	tr|E7EPC6|E7EPC6_HUMAN	CD44 antigen OS=Homo sapiens GN=CD44 PE=4 SV=2	HUMAN	10	1.1643	0.238074	0.155535	1.32859	0.876339	1.54688	1.05785	0.745153	0.307116	1.4982	0.70608	1.58487
214	12.17	12.24	28.85	20.93	17.18	tr|J3KQ45|J3KQ45_HUMAN	Trans-Golgi network integral membrane protein 2 OS=Homo sapiens GN=TGOLN2 PE=4 SV=1	HUMAN	6	1.04728	0.517304	0.243489	1.17865	0.888543	1.23437	1.04967	0.729427	0.303007	1.38716	0.756707	1.45606
215	12.13	12.46	18.56	8.133	7.216	tr|E9PFU1|E9PFU1_HUMAN	Programmed cell death 6-interacting protein OS=Homo sapiens GN=PDCD6IP PE=4 SV=1	HUMAN	6	1.08641	0.75062	0.308334	1.88604	0.57603	2.04902	1.28883	0.408934	0.21448	2.06287	0.624773	2.65868
216	12.09	12.09	62.77	48.94	38.3	tr|E9PBB5|E9PBB5_HUMAN	Trefoil factor 3 OS=Homo sapiens GN=TFF3 PE=4 SV=1	HUMAN	12	3.71393	0.0158898	0.0234893	2.32744	1.59572	8.64396	7.76956	0.0545361	0.0580767	8.36943	0.928327	65.0268
217	12.08	12.09	37.07	37.07	32.68	sp|P04792|HSPB1_HUMAN	Heat shock protein beta-1 OS=Homo sapiens GN=HSPB1 PE=1 SV=2	HUMAN	9	0.992932	0.934013	0.348994	1.23307	0.805252	1.22435	0.820597	0.29579	0.179256	1.54582	0.530848	1.2685
218	11.95	12.03	20.74	19.26	13.89	sp|Q16610|ECM1_HUMAN	Extracellular matrix protein 1 OS=Homo sapiens GN=ECM1 PE=1 SV=2	HUMAN	7	0.878282	0.448432	0.226011	1.47948	0.593641	1.2994	0.522037	0.000851762	0.00251075	1.29551	0.402957	0.676306
219	11.9	11.96	28.11	20.74	19.35	sp|O60664|PLIN3_HUMAN	Perilipin-3 OS=Homo sapiens GN=PLIN3 PE=1 SV=3	HUMAN	6	0.760509	0.608355	0.269743	3.62715	0.209671	2.75848	1.08212	0.833407	0.322606	2.49867	0.433079	2.70386
220	11.89	11.98	22.92	13.45	13.45	sp|P14314|GLU2B_HUMAN	Glucosidase 2 subunit beta OS=Homo sapiens GN=PRKCSH PE=1 SV=2	HUMAN	8	1.00982	0.956592	0.353885	1.50629	0.670402	1.52108	1.06231	0.763972	0.31208	1.58071	0.672047	1.6792
221	11.88	12.05	21.43	16.73	13.35	tr|F5GXJ9|F5GXJ9_HUMAN	CD166 antigen OS=Homo sapiens GN=ALCAM PE=4 SV=1	HUMAN	6	1.06682	0.533792	0.247146	1.27105	0.839325	1.35598	0.826677	0.114953	0.0978199	1.28758	0.642037	1.06442
222	11.86	13.95	29.87	24.68	19.81	sp|Q12841|FSTL1_HUMAN	Follistatin-related protein 1 OS=Homo sapiens GN=FSTL1 PE=1 SV=1	HUMAN	8	1.2214	0.299717	0.180428	1.59426	0.766124	1.94724	0.801044	0.226682	0.151091	1.53954	0.520315	1.23324
224	11.78	11.88	37.67	26.91	22.87	sp|P02743|SAMP_HUMAN	Serum amyloid P-component OS=Homo sapiens GN=APCS PE=1 SV=2	HUMAN	7	0.95314	0.809877	0.318474	1.57506	0.605147	1.50125	0.553324	0.00758333	0.0131182	1.45871	0.379325	0.807138
225	11.74	12.01	92.39	81.52	39.13	sp|P80511|S10AC_HUMAN	Protein S100-A12 OS=Homo sapiens GN=S100A12 PE=1 SV=2	HUMAN	7	1.50759	0.0590274	0.061439	1.54035	0.978726	2.32222	0.769578	0.0756154	0.0734461	1.3482	0.570817	1.03755
226	11.53	11.56	30	20.3	20.3	sp|Q6P5S2|CF058_HUMAN	UPF0762 protein C6orf58 OS=Homo sapiens GN=C6orf58 PE=1 SV=2	HUMAN	8	2.13898	0.00640466	0.0118405	1.61462	1.32476	3.45363	4.40214	0.00287881	0.00665089	2.24361	1.96208	9.87668
227	11.32	21.52	66.2	54.46	38.03	sp|P16403|H12_HUMAN	Histone H1.2 OS=Homo sapiens GN=HIST1H1C PE=1 SV=2	HUMAN	14	1.39356	0.309865	0.183559	2.37757	0.586127	3.31328	2.75195	0.0341688	0.0416809	2.38572	1.15351	6.56538
229	11.24	11.32	41.98	20.99	18.7	tr|G3V4W0|G3V4W0_HUMAN	Heterogeneous nuclear ribonucleoproteins C1/C2 (Fragment) OS=Homo sapiens GN=HNRNPC PE=4 SV=1	HUMAN	6	1.24834	0.353204	0.196294	1.74619	0.714894	2.17984	1.00816	0.938273	0.349918	1.29271	0.779883	1.30326
230	11.19	11.22	15.2	14.37	14.37	sp|Q9NZP8|C1RL_HUMAN	Complement C1r subcomponent-like protein OS=Homo sapiens GN=C1RL PE=1 SV=2	HUMAN	6	0.561327	0.0217306	0.0303293	1.45119	0.386804	0.814594	0.626317	0.0819295	0.0772072	1.84915	0.338705	1.15816
231	11.12	15.27	45	31.43	23.1	sp|P80303|NUCB2_HUMAN	Nucleobindin-2 OS=Homo sapiens GN=NUCB2 PE=1 SV=2	HUMAN	9	1.77578	0.00591645	0.0112371	1.42829	1.24329	2.53633	2.74505	0.00379079	0.00811013	1.78227	1.54019	4.89242
232	11.09	11.22	24.26	16.46	15.19	sp|P48637|GSHB_HUMAN	Glutathione synthetase OS=Homo sapiens GN=GSS PE=1 SV=1	HUMAN	7	0.853375	0.492704	0.235465	1.7351	0.491829	1.48069	1.26575	0.460656	0.228421	2.13511	0.592826	2.70252
233	10.97	10.98	13.51	10.67	9.815	sp|P23142|FBLN1_HUMAN	Fibulin-1 OS=Homo sapiens GN=FBLN1 PE=1 SV=4	HUMAN	7	0.783343	0.306697	0.182274	1.78427	0.439028	1.39769	0.515661	0.0296707	0.0387679	1.74291	0.295862	0.898749
234	10.89	11.23	27.95	26.22	22.77	sp|O43866|CD5L_HUMAN	CD5 antigen-like OS=Homo sapiens GN=CD5L PE=1 SV=1	HUMAN	6	0.146913	8.68148e-05	0.000390098	1.39162	0.10557	0.204446	0.19068	0.00244993	0.00586174	1.96799	0.0968908	0.375255
235	10.89	10.98	33.48	31.25	24.55	sp|P02741|CRP_HUMAN	C-reactive protein OS=Homo sapiens GN=CRP PE=1 SV=1	HUMAN	6	0.842298	0.335711	0.192076	1.49385	0.563845	1.25826	0.436989	0.0168991	0.0246115	1.85575	0.235478	0.810942
236	10.87	11.04	36.14	34.16	34.16	sp|P05452|TETN_HUMAN	Tetranectin OS=Homo sapiens GN=CLEC3B PE=1 SV=3	HUMAN	8	0.755337	0.486198	0.233282	2.61156	0.289228	1.97261	0.319499	7.45661e-05	0.000347783	1.2802	0.24957	0.409022
238	10.75	10.75	28.1	22.66	16.92	sp|P25774|CATS_HUMAN	Cathepsin S OS=Homo sapiens GN=CTSS PE=1 SV=3	HUMAN	6	0.93611	0.687728	0.291267	1.46644	0.638355	1.37275	1.3684	0.0740601	0.0723831	1.42659	0.959209	1.95214
239	10.64	43.22	80.24	72.58	67.34	sp|P67936|TPM4_HUMAN	Tropomyosin alpha-4 chain OS=Homo sapiens GN=TPM4 PE=1 SV=3	HUMAN	31	0.979873	0.887171	0.337754	1.41933	0.690378	1.39076	1.1932	0.155932	0.118389	1.31265	0.908994	1.56625
240	10.63	10.67	45.26	41.05	35.79	sp|P25815|S100P_HUMAN	Protein S100-P OS=Homo sapiens GN=S100P PE=1 SV=2	HUMAN	7	2.63448	0.00345347	0.00761962	1.61366	1.63261	4.25116	2.0846	0.0188948	0.0269846	1.73789	1.1995	3.6228
241	10.61	10.84	24.07	11.36	9.153	tr|G3XAD8|G3XAD8_HUMAN	Stress-induced-phosphoprotein 1 OS=Homo sapiens GN=STIP1 PE=4 SV=1	HUMAN	6	1.59985	0.00610159	0.0114705	1.33227	1.20085	2.13144	1.58528	0.0220498	0.0305434	1.45065	1.0928	2.2997
242	10.58	32.51	47.1	35.36	27.9	sp|P08238|HS90B_HUMAN	Heat shock protein HSP 90-beta OS=Homo sapiens GN=HSP90AB1 PE=1 SV=4	HUMAN	19	0.797117	0.56983	0.257938	3.10812	0.256462	2.47754	0.937353	0.872482	0.333556	3.2503	0.288389	3.04668
243	10.53	18.16	62.9	56.85	40.73	sp|P31947|1433S_HUMAN	14-3-3 protein sigma OS=Homo sapiens GN=SFN PE=1 SV=1	HUMAN	13	3.39368	0.0383862	0.0448273	3.05153	1.11212	10.3559	2.78373	0.1113	0.0953718	4.03533	0.68984	11.2333
244	10.46	14.77	14.79	11.49	9.37	sp|P08123|CO1A2_HUMAN	Collagen alpha-2(I) chain OS=Homo sapiens GN=COL1A2 PE=1 SV=7	HUMAN	11	1.35839	0.301098	0.180428	2.59535	0.523392	3.52549	0.979272	0.943761	0.351609	3.10005	0.315889	3.03579
245	10.44	12.33	26.14	17.61	14.2	tr|F5H098|F5H098_HUMAN	Malate dehydrogenase, cytoplasmic OS=Homo sapiens GN=MDH1 PE=3 SV=1	HUMAN	7	1.01883	0.89753	0.340088	1.39152	0.732171	1.41772	0.954178	0.784814	0.314019	1.47839	0.645418	1.41064
246	10.4	10.4	59.07	39.07	29.3	sp|P09429|HMGB1_HUMAN	High mobility group protein B1 OS=Homo sapiens GN=HMGB1 PE=1 SV=3	HUMAN	7	1.27982	0.237409	0.155375	1.60444	0.797672	2.0534	1.60622	0.0266008	0.0352568	1.47989	1.08537	2.37703
247	10.37	10.38	50.5	39.6	39.6	sp|P26447|S10A4_HUMAN	Protein S100-A4 OS=Homo sapiens GN=S100A4 PE=1 SV=1	HUMAN	7	1.42152	0.0380816	0.0448104	1.37058	1.03716	1.9483	1.0066	0.961468	0.354976	1.49	0.675566	1.49983
248	10.32	10.38	40.44	39.89	39.89	sp|P02794|FRIH_HUMAN	Ferritin heavy chain OS=Homo sapiens GN=FTH1 PE=1 SV=2	HUMAN	8	0.618392	0.0429237	0.0485147	1.58112	0.39111	0.97775	0.491325	0.0299547	0.0390007	1.83708	0.267448	0.902603
249	10.27	10.35	29.6	21.6	16.53	sp|P35247|SFTPD_HUMAN	Pulmonary surfactant-associated protein D OS=Homo sapiens GN=SFTPD PE=1 SV=3	HUMAN	8	0.384882	0.000558879	0.00173047	1.30301	0.295379	0.501505	0.20226	0.0560542	0.0589021	5.28202	0.0382922	1.06834
250	10.22	10.28	51.63	36.96	30.43	sp|P63241-2|IF5A1_HUMAN	Isoform 2 of Eukaryotic translation initiation factor 5A-1 OS=Homo sapiens GN=EIF5A	HUMAN	7	2.42248	0.00619964	0.0115956	1.5933	1.52042	3.85974	1.15152	0.707197	0.296446	2.63939	0.436282	3.03932
251	10.18	10.47	17.87	11.79	10.84	tr|C9JIZ6|C9JIZ6_HUMAN	Saposin-D OS=Homo sapiens GN=PSAP PE=4 SV=1	HUMAN	6	0.98559	0.954293	0.353389	1.93605	0.509071	1.90816	1.04082	0.889746	0.338047	2.12142	0.490623	2.20802
252	10.06	12.09	8.661	5.433	4.094	sp|Q92954-4|PRG4_HUMAN	Isoform D of Proteoglycan 4 OS=Homo sapiens GN=PRG4	HUMAN	7	0.394852	0.000351468	0.00122173	1.40623	0.280787	0.555253	0.395898	6.44051e-05	0.000308194	1.29627	0.305414	0.51319
253	10.01	10.21	19.95	18.78	17.61	tr|Q5JP53|Q5JP53_HUMAN	Tubulin beta chain OS=Homo sapiens GN=TUBB PE=3 SV=1	HUMAN	7	0.523637	0.587789	0.263478	77.5426	0.0067529	40.6042	0.788966	0.623235	0.273706	5.88948	0.133962	4.6466
254	9.91	10.02	29.85	23.88	19.7	sp|P09668|CATH_HUMAN	Pro-cathepsin H OS=Homo sapiens GN=CTSH PE=1 SV=4	HUMAN	6	0.750662	0.23008	0.151976	1.75557	0.427589	1.31784	0.790294	0.259545	0.162365	1.64496	0.480433	1.3
255	9.86	9.97	32.13	21.88	10.25	sp|P00338-3|LDHA_HUMAN	Isoform 3 of L-lactate dehydrogenase A chain OS=Homo sapiens GN=LDHA	HUMAN	7	1.18797	0.14016	0.109257	1.28758	0.922639	1.52961	1.15388	0.177855	0.129768	1.26467	0.912398	1.45927
256	9.83	9.87	40	31.28	31.28	sp|Q9ULZ3|ASC_HUMAN	Apoptosis-associated speck-like protein containing a CARD OS=Homo sapiens GN=PYCARD PE=1 SV=2	HUMAN	5	1.38055	0.206988	0.143187	1.89576	0.728231	2.61719	1.52376	0.0162549	0.0238619	1.31447	1.15922	2.00294
257	9.8	9.89	15.55	10.7	8.696	sp|Q16881-3|TRXR1_HUMAN	Isoform 3 of Thioredoxin reductase 1, cytoplasmic OS=Homo sapiens GN=TXNRD1	HUMAN	5	1.06996	0.739782	0.306272	1.69419	0.631546	1.81272	1.69343	0.0396848	0.0456216	1.62639	1.04122	2.75417
258	9.79	9.86	4.418	1.708	1.366	sp|P98160|PGBM_HUMAN	Basement membrane-specific heparan sulfate proteoglycan core protein OS=Homo sapiens GN=HSPG2 PE=1 SV=4	HUMAN	5	0.588249	0.11243	0.095894	2.03244	0.28943	1.19558	0.353014	0.0381869	0.0448104	2.60533	0.135497	0.919717
259	9.76	11.14	43.48	30.43	21.74	tr|Q6P452|Q6P452_HUMAN	Annexin OS=Homo sapiens GN=ANXA4 PE=2 SV=1	HUMAN	8	1.38037	0.399461	0.212697	2.58516	0.533958	3.56847	1.31367	0.257486	0.161626	1.77537	0.73994	2.33224
260	9.75	9.91	22.17	12.7	12.7	sp|P20061|TCO1_HUMAN	Transcobalamin-1 OS=Homo sapiens GN=TCN1 PE=1 SV=2	HUMAN	7	2.55958	0.0312664	0.0395894	2.08004	1.23055	5.32403	5.4328	0.0044382	0.00903488	1.62708	3.33898	8.83962
261	9.74	9.75	30.25	21.01	21.01	tr|B7Z6Z4|B7Z6Z4_HUMAN	Myosin light polypeptide 6 OS=Homo sapiens GN=MYL6 PE=2 SV=1	HUMAN	8	1.4118	0.0898751	0.0811659	1.52566	0.925368	2.15393	1.83436	0.0724186	0.0713465	1.98789	0.922766	3.6465
262	9.68	9.78	22.58	20.79	17.92	tr|B4E1N2|B4E1N2_HUMAN	Insulin-like growth factor-binding protein 7 OS=Homo sapiens GN=IGFBP7 PE=2 SV=1	HUMAN	5	1.61053	0.040554	0.0462621	1.55777	1.03387	2.50884	2.07268	0.0139728	0.0211003	1.62352	1.27666	3.36504
263	9.68	9.77	18.2	9.894	9.894	tr|E9PAU8|E9PAU8_HUMAN	Liver carboxylesterase 1 OS=Homo sapiens GN=CES1 PE=4 SV=1	HUMAN	5	0.593118	0.0122808	0.0190674	1.39702	0.424559	0.828598	0.714496	0.22165	0.149033	1.90653	0.374762	1.36221
264	9.66	9.68	100	84.69	67.35	sp|P04080|CYTB_HUMAN	Cystatin-B OS=Homo sapiens GN=CSTB PE=1 SV=2	HUMAN	7	2.04059	0.00164673	0.00424308	1.38064	1.478	2.81732	2.16375	0.0278463	0.036644	1.92415	1.12452	4.16338
265	9.64	10.56	17.77	12.35	9.983	sp|P07358|CO8B_HUMAN	Complement component C8 beta chain OS=Homo sapiens GN=C8B PE=1 SV=3	HUMAN	6	0.926444	0.188439	0.13456	1.13202	0.818396	1.04876	0.47185	5.1502e-06	4.12535e-05	1.15426	0.408791	0.544637
266	9.64	9.94	68.15	54.07	39.26	sp|Q01469|FABP5_HUMAN	Fatty acid-binding protein, epidermal OS=Homo sapiens GN=FABP5 PE=1 SV=3	HUMAN	6	1.28647	0.0384446	0.0448273	1.25435	1.02561	1.61368	0.772641	0.0420302	0.0477981	1.27178	0.607525	0.982631
267	9.6	9.62	46.08	46.08	46.08	sp|P61604|CH10_HUMAN	10 kDa heat shock protein, mitochondrial OS=Homo sapiens GN=HSPE1 PE=1 SV=2	HUMAN	5	1.16979	0.415964	0.216361	1.69907	0.688485	1.98755	0.892114	0.616814	0.27251	1.92131	0.464326	1.71403
269	9.5	9.5	17.02	15.85	12.59	tr|E9PCE8|E9PCE8_HUMAN	Xaa-Pro dipeptidase OS=Homo sapiens GN=PEPD PE=3 SV=1	HUMAN	5	1.18465	0.416695	0.216361	1.77497	0.667422	2.10271	1.76646	0.172913	0.12717	2.76338	0.639239	4.88141
270	9.47	11.95	10.42	3.557	2.203	sp|P12111|CO6A3_HUMAN	Collagen alpha-3(VI) chain OS=Homo sapiens GN=COL6A3 PE=1 SV=5	HUMAN	9	1.99899	0.00372039	0.00806369	1.41637	1.41135	2.83131	1.39031	0.262421	0.163332	1.95623	0.710709	2.71978
271	9.28	9.3	54.81	50	41.35	sp|P10599|THIO_HUMAN	Thioredoxin OS=Homo sapiens GN=TXN PE=1 SV=?		8	1.81666	0.000453451	0.00147859	1.27309	1.42697	2.31278	1.45673	0.00575756	0.0110501	1.26156	1.15471	1.83774
272	9.21	9.23	21.02	17.72	15.32	tr|A6NC48|A6NC48_HUMAN	ADP-ribosyl cyclase 2 OS=Homo sapiens GN=BST1 PE=4 SV=1	HUMAN	5	0.790268	0.0991919	0.0876465	1.34902	0.585808	1.06609	0.987555	0.970166	0.357471	2.26858	0.435319	2.24035
275	9.01	9.02	58.97	48.08	39.74	sp|P07998|RNAS1_HUMAN	Ribonuclease pancreatic OS=Homo sapiens GN=RNASE1 PE=1 SV=4	HUMAN	7	0.958267	0.781362	0.313962	4.54772	0.210714	4.35793	1.17995	0.370526	0.201662	3.98906	0.295796	4.70689
276	8.92	8.92	32.8	30.4	25.2	sp|P17931|LEG3_HUMAN	Galectin-3 OS=Homo sapiens GN=LGALS3 PE=1 SV=5	HUMAN	7	1.35092	0.0587013	0.061439	1.37162	0.984908	1.85296	1.8866	0.00109502	0.00307996	1.30374	1.44707	2.45964
277	8.9	9.04	16.4	9.453	8.567	tr|E9PDD1|E9PDD1_HUMAN	Vascular cell adhesion protein 1 OS=Homo sapiens GN=VCAM1 PE=4 SV=1	HUMAN	5	0.511779	0.0029061	0.00665089	1.2676	0.40374	0.648729	0.325092	0.0123107	0.0190674	1.93377	0.168113	0.628653
278	8.81	8.83	37.62	31.19	31.19	sp|P07360|CO8G_HUMAN	Complement component C8 gamma chain OS=Homo sapiens GN=C8G PE=1 SV=3	HUMAN	5	0.864492	0.123301	0.100959	1.23066	0.702462	1.0639	0.470293	0.0128186	0.0197623	1.63065	0.288409	0.766882
279	8.73	9.89	20.05	13.45	12.22	sp|P54727|RD23B_HUMAN	UV excision repair protein RAD23 homolog B OS=Homo sapiens GN=RAD23B PE=1 SV=1	HUMAN	6	1.24894	0.338749	0.192936	1.86461	0.669813	2.3288	1.14908	0.451341	0.226011	1.66869	0.688614	1.91746
280	8.66	8.97	14.91	6.707	4.905	sp|Q9Y4L1|HYOU1_HUMAN	Hypoxia up-regulated protein 1 OS=Homo sapiens GN=HYOU1 PE=1 SV=1	HUMAN	5	0.913395	0.710426	0.297461	1.76694	0.516935	1.61392	0.914376	0.839732	0.32467	2.82127	0.3241	2.57971
281	8.62	8.62	27.22	23.96	20.41	sp|P09467|F16P1_HUMAN	Fructose-1,6-bisphosphatase 1 OS=Homo sapiens GN=FBP1 PE=1 SV=5	HUMAN	7	0.562795	0.0248324	0.0332721	1.48769	0.378301	0.837263	1.09784	0.724432	0.301625	2.69322	0.40763	2.95672
282	8.6	8.69	32.66	32.66	24.62	sp|P37802|TAGL2_HUMAN	Transgelin-2 OS=Homo sapiens GN=TAGLN2 PE=1 SV=3	HUMAN	8	1.86289	0.0940919	0.0843538	2.26531	0.822354	4.22003	1.24711	0.214732	0.14598	1.56509	0.79683	1.95183
283	8.59	8.59	43.75	42.97	36.72	sp|P02775|CXCL7_HUMAN	Platelet basic protein OS=Homo sapiens GN=PPBP PE=1 SV=3	HUMAN	5	0.946624	0.643911	0.279455	1.33236	0.710484	1.26125	2.11789	0.00672077	0.0118645	1.54318	1.37242	3.26829
284	8.56	8.89	20.46	13.58	8.02	sp|P09960|LKHA4_HUMAN	Leukotriene A-4 hydrolase OS=Homo sapiens GN=LTA4H PE=1 SV=2	HUMAN	6	0.992483	0.978235	0.357814	2.87046	0.345758	2.84888	0.858538	0.436783	0.221984	1.97559	0.434572	1.69612
285	8.52	10.19	36.31	31.38	26.15	sp|P14550|AK1A1_HUMAN	Alcohol dehydrogenase [NADP(+)] OS=Homo sapiens GN=AKR1A1 PE=1 SV=3	HUMAN	6	1.31938	0.629041	0.275271	5.18017	0.254698	6.83462	1.04873	0.934848	0.348994	5.50228	0.190599	5.7704
286	8.45	8.55	75	68.42	60.53	sp|Q15847|APM2_HUMAN	Adipose most abundant gene transcript 2 protein OS=Homo sapiens GN=APM2 PE=1 SV=1	HUMAN	7	1.65365	0.126799	0.102233	3.63282	0.455196	6.0074	0.474055	0.08699	0.0797133	3.68429	0.128669	1.74656
287	8.41	10.28	33.05	32.62	17.17	sp|O75015|FCG3B_HUMAN	Low affinity immunoglobulin gamma Fc region receptor III-B OS=Homo sapiens GN=FCGR3B PE=1 SV=2	HUMAN	6	0.886252	0.567726	0.257619	1.63053	0.543535	1.44506	0.854175	0.460167	0.228421	1.63047	0.523884	1.3927
288	8.38	8.38	31.67	23.33	20.83	sp|Q96C19|EFHD2_HUMAN	EF-hand domain-containing protein D2 OS=Homo sapiens GN=EFHD2 PE=1 SV=1	HUMAN	7	1.33209	0.0442024	0.0496553	1.31609	1.01215	1.75316	1.95986	0.0351126	0.0420055	1.81551	1.07951	3.55814
289	8.27	8.44	25	22.38	16.28	sp|P40199|CEAM6_HUMAN	Carcinoembryonic antigen-related cell adhesion molecule 6 OS=Homo sapiens GN=CEACAM6 PE=1 SV=3	HUMAN	4	0.53976	0.484541	0.233282	22.6252	0.0238566	12.2122	0.704274	0.0661649	0.0662482	1.50472	0.468044	1.05974
290	8.25	8.26	48.63	41.78	41.78	sp|P12273|PIP_HUMAN	Prolactin-inducible protein OS=Homo sapiens GN=PIP PE=1 SV=1	HUMAN	6	0.858925	0.567716	0.257619	1.89568	0.453096	1.62825	2.05331	0.0327788	0.0404519	1.88162	1.09125	3.86355
291	8.25	8.25	19.47	14.21	12.37	sp|P50552|VASP_HUMAN	Vasodilator-stimulated phosphoprotein OS=Homo sapiens GN=VASP PE=1 SV=3	HUMAN	7	1.81041	0.00297852	0.00673298	1.29119	1.40212	2.33758	3.3106	0.00403843	0.00855181	1.75042	1.89131	5.79495
292	8.23	8.6	34.3	30.43	19.81	sp|P01033|TIMP1_HUMAN	Metalloproteinase inhibitor 1 OS=Homo sapiens GN=TIMP1 PE=1 SV=1	HUMAN	6	1.07263	0.559008	0.254603	1.54367	0.694857	1.65578	0.480252	0.0397789	0.0456216	1.91359	0.25097	0.919004
293	8.2	8.28	30.55	20.1	16.71	sp|P36222|CH3L1_HUMAN	Chitinase-3-like protein 1 OS=Homo sapiens GN=CHI3L1 PE=1 SV=2	HUMAN	6	0.465729	0.344891	0.19365	8.79487	0.0529546	4.09602	0.913835	0.815711	0.319626	3.08805	0.295926	2.82197
294	8.17	14.69	47.15	33.33	26.42	sp|Q04917|1433F_HUMAN	14-3-3 protein eta OS=Homo sapiens GN=YWHAH PE=1 SV=4	HUMAN	12	1.22029	0.660607	0.285692	72.7224	0.0167801	88.7423	0.991619	0.949331	0.351905	3.82209	0.259444	3.79006
296	8.1	8.2	26.6	20.21	20.21	sp|O75223|GGCT_HUMAN	Gamma-glutamylcyclotransferase OS=Homo sapiens GN=GGCT PE=1 SV=1	HUMAN	5	1.46402	0.169376	0.124818	3.74303	0.391133	5.47988	0.990722	0.978866	0.357814	35.3795	0.0280027	35.0512
297	8.09	8.15	26.01	17.23	17.23	tr|H3BT71|H3BT71_HUMAN	RNA-binding motif protein, X chromosome OS=Homo sapiens GN=RBMX PE=4 SV=1	HUMAN	6	0.628639	0.0849836	0.078814	1.79045	0.351107	1.12555	0.654485	0.0342756	0.0416809	1.43986	0.454546	0.94237
299	8.06	8.14	22.72	11.8	11.8	tr|E7EVW7|E7EVW7_HUMAN	Hematopoietic lineage cell-specific protein OS=Homo sapiens GN=HCLS1 PE=4 SV=1	HUMAN	4	0.637904	0.555446	0.254238	902.501	0.000706818	575.709	1.59224	0.58267	0.261501	2176.83	0.00073145	3466.05
300	8.06	8.11	21.25	15.3	13.88	sp|P22626|ROA2_HUMAN	Heterogeneous nuclear ribonucleoproteins A2/B1 OS=Homo sapiens GN=HNRNPA2B1 PE=1 SV=2	HUMAN	5	0.736828	0.948766	0.351905	7.85709e+20	9.37787e-22	5.78932e+20	0.17296	0.518085	0.243489	17743609856	9.74774e-12	3.06894e+09
301	8.05	8.05	28.68	24.81	22.09	sp|P22692|IBP4_HUMAN	Insulin-like growth factor-binding protein 4 OS=Homo sapiens GN=IGFBP4 PE=1 SV=2	HUMAN	5	0.613126	0.22076	0.148705	2.74427	0.223421	1.68258	0.404491	0.00131271	0.00358286	1.2768	0.316801	0.516453
304	8.04	8.11	13.61	10.02	8.696	sp|Q6UX71|PXDC2_HUMAN	Plexin domain-containing protein 2 OS=Homo sapiens GN=PLXDC2 PE=1 SV=1	HUMAN	4	1.12312	0.24719	0.157637	1.26879	0.885193	1.425	0.907508	0.547034	0.251324	1.50689	0.602239	1.36751
305	8.04	8.08	21.38	13.52	13.52	sp|Q92820|GGH_HUMAN	Gamma-glutamyl hydrolase OS=Homo sapiens GN=GGH PE=1 SV=2	HUMAN	4	0.941687	0.472252	0.23064	1.26253	0.745872	1.18891	1.40733	0.0188891	0.0269846	1.26419	1.11323	1.77914
306	8.02	8.04	21.59	17.18	17.18	sp|Q96S96|PEBP4_HUMAN	Phosphatidylethanolamine-binding protein 4 OS=Homo sapiens GN=PEBP4 PE=1 SV=3	HUMAN	5	0.416997	0.0135794	0.0208479	1.55755	0.267726	0.649494	0.325682	0.00661734	0.0118645	1.48386	0.219484	0.483265
307	8.01	8.01	17.74	9.946	9.946	sp|P14151|LYAM1_HUMAN	L-selectin OS=Homo sapiens GN=SELL PE=1 SV=2	HUMAN	6	0.659159	0.0449448	0.0501833	1.48232	0.44468	0.977085	0.772653	0.117849	0.0984649	1.52042	0.508185	1.17475
308	7.56	8.31	15.38	4.199	1.938	sp|Q13813-2|SPTN1_HUMAN	Isoform 2 of Spectrin alpha chain, non-erythrocytic 1 OS=Homo sapiens GN=SPTAN1	HUMAN	4	1.1126	0.517833	0.243489	1.51918	0.73237	1.69025	0.916635	0.685539	0.291267	1.74126	0.526421	1.5961
309	7.56	7.64	20.59	11.76	9.559	sp|Q8NC51|PAIRB_HUMAN	Plasminogen activator inhibitor 1 RNA-binding protein OS=Homo sapiens GN=SERBP1 PE=1 SV=2	HUMAN	4	0.958441	0.752888	0.30859	1.41823	0.675803	1.35929	1.46948	0.0600548	0.06181	1.50829	0.974265	2.2164
310	7.55	7.72	17.06	7.58	5.394	tr|H0YAC1|H0YAC1_HUMAN	Plasma kallikrein light chain (Fragment) OS=Homo sapiens GN=KLKB1 PE=3 SV=1	HUMAN	9	0.301344	8.475e-05	0.000385522	1.22805	0.245385	0.370064	0.335754	0.00242432	0.00583837	1.55989	0.215243	0.523739
311	7.5	7.54	15.23	10.22	6.613	sp|P05546|HEP2_HUMAN	Heparin cofactor 2 OS=Homo sapiens GN=SERPIND1 PE=1 SV=3	HUMAN	4	0.668846	0.122921	0.100873	1.77268	0.377307	1.18565	0.848433	0.77474	0.313843	4.43798	0.191175	3.76533
312	7.48	7.49	36.02	27.2	19.92	sp|Q14847|LASP1_HUMAN	LIM and SH3 domain protein 1 OS=Homo sapiens GN=LASP1 PE=1 SV=2	HUMAN	7	1.3229	0.529	0.24622	2.8984	0.456426	3.83431	1.53519	0.452679	0.226011	3.8728	0.396403	5.94548
313	7.47	7.78	7.008	2.326	1.649	sp|P13611|CSPG2_HUMAN	Versican core protein OS=Homo sapiens GN=VCAN PE=1 SV=3	HUMAN	5	1.50988	0.217134	0.1468	2.70845	0.557471	4.08945	1.03918	0.795054	0.31554	1.74784	0.594547	1.81631
314	7.44	9.74	16.31	11.63	8.936	sp|P00736|C1R_HUMAN	Complement C1r subcomponent OS=Homo sapiens GN=C1R PE=1 SV=2	HUMAN	6	0.698012	0.15776	0.118389	2.01413	0.346557	1.40589	0.509862	0.0164658	0.0240756	1.45733	0.349859	0.743039
315	7.35	7.61	16.76	6.039	2.775	sp|P20908|CO5A1_HUMAN	Collagen alpha-1(V) chain OS=Homo sapiens GN=COL5A1 PE=1 SV=3	HUMAN	4	2.32978	0.0334484	0.0410817	1.97951	1.17695	4.61181	2.51996	0.0360735	0.0430154	2.1739	1.15919	5.47815
316	7.3	7.56	26.31	17.98	10.83	sp|P34932|HSP74_HUMAN	Heat shock 70 kDa protein 4 OS=Homo sapiens GN=HSPA4 PE=1 SV=4	HUMAN	7	1.54296	0.0596086	0.0616955	1.58696	0.972273	2.44863	1.39539	0.129858	0.103792	1.62601	0.858164	2.26892
318	7.26	7.8	13.41	5.355	2.22	tr|E7EVA0|E7EVA0_HUMAN	Microtubule-associated protein OS=Homo sapiens GN=MAP4 PE=4 SV=1	HUMAN	5	0.893843	0.619319	0.272962	1.78499	0.500754	1.5955	0.878348	0.394009	0.21163	1.45843	0.602258	1.281
319	7.26	7.28	22.13	18.4	12.8	sp|P08571|CD14_HUMAN	Monocyte differentiation antigen CD14 OS=Homo sapiens GN=CD14 PE=1 SV=2	HUMAN	5	0.832517	0.449319	0.226011	2.3289	0.357472	1.93885	0.98874	0.974514	0.357814	3.86322	0.255937	3.81972
320	7.25	7.25	40.66	30.77	30.77	sp|P55145|MANF_HUMAN	Mesencephalic astrocyte-derived neurotrophic factor OS=Homo sapiens GN=MANF PE=1 SV=3	HUMAN	4	1.26191	0.059887	0.06181	1.2849	0.98211	1.62142	2.11952	0.00246856	0.00586823	1.28589	1.64829	2.72547
321	7.21	8.25	9.392	4.586	2.21	tr|G3XAI2|G3XAI2_HUMAN	Laminin subunit beta-1 OS=Homo sapiens GN=LAMB1 PE=4 SV=1	HUMAN	4	1.72766	0.00538508	0.0106107	1.34949	1.28023	2.33146	1.48667	0.128908	0.103481	1.75258	0.848271	2.60551
322	7.2	17.71	19.65	14.49	10.76	sp|O43707|ACTN4_HUMAN	Alpha-actinin-4 OS=Homo sapiens GN=ACTN4 PE=1 SV=2	HUMAN	10	1.05697	0.814124	0.319462	1.98814	0.531634	2.1014	1.04004	0.734728	0.304865	1.39933	0.743242	1.45537
323	7.13	7.23	13.99	7.809	4.429	sp|P13639|EF2_HUMAN	Elongation factor 2 OS=Homo sapiens GN=EEF2 PE=1 SV=4	HUMAN	4	1.12665	0.776156	0.313843	3.38737	0.332602	3.81636	1.56022	0.315398	0.186238	3.24464	0.480861	5.06235
324	7.07	7.07	48.51	37.62	37.62	sp|P31151|S10A7_HUMAN	Protein S100-A7 OS=Homo sapiens GN=S100A7 PE=1 SV=4	HUMAN	4	0.235966	0.00349768	0.00762585	1.44551	0.163241	0.341091	0.273231	0.00441643	0.00903488	1.451	0.188305	0.396457
326	7	7.01	20.34	13.49	8.994	sp|P22894|MMP8_HUMAN	Neutrophil collagenase OS=Homo sapiens GN=MMP8 PE=1 SV=1	HUMAN	5	1.1611	0.425582	0.2184	1.6767	0.692493	1.94682	1.3349	0.272501	0.169035	1.9849	0.672526	2.64964
327	6.97	6.97	20.53	15.79	15.79	sp|O75995|SASH3_HUMAN	SAM and SH3 domain-containing protein 3 OS=Homo sapiens GN=SASH3 PE=1 SV=2	HUMAN	4	0.802561	0.504886	0.239732	2.52552	0.31778	2.02688	0.94218	0.925736	0.347143	6.49923	0.144968	6.12344
328	6.91	7.05	13.29	10.32	10.32	sp|P78324|SHPS1_HUMAN	Tyrosine-protein phosphatase non-receptor type substrate 1 OS=Homo sapiens GN=SIRPA PE=1 SV=2	HUMAN	5	0.833319	0.364524	0.199279	1.72319	0.483591	1.43597	1.29381	0.0895785	0.0810968	1.3924	0.929197	1.80149
329	6.91	7.01	15.45	12.85	7.292	sp|Q96PD5|PGRP2_HUMAN	N-acetylmuramoyl-L-alanine amidase OS=Homo sapiens GN=PGLYRP2 PE=1 SV=1	HUMAN	4	0.651724	0.117602	0.0984649	2.00291	0.325389	1.30534	0.592098	0.0845434	0.078814	2.01569	0.293745	1.19349
330	6.86	7	23.62	12.13	9.574	tr|B4DQJ8|B4DQJ8_HUMAN	6-phosphogluconate dehydrogenase, decarboxylating OS=Homo sapiens GN=PGD PE=2 SV=1	HUMAN	4	1.13589	0.468403	0.229507	1.5558	0.730097	1.76721	1.87657	0.0817837	0.0772072	2.12872	0.881548	3.99471
332	6.83	10.08	53.94	48.48	41.21	sp|P60981|DEST_HUMAN	Destrin OS=Homo sapiens GN=DSTN PE=1 SV=3	HUMAN	8	1.63144	0.324861	0.188361	5.08986	0.320527	8.30377	0.738586	0.307324	0.182347	2.61174	0.282795	1.92899
333	6.83	6.85	22.71	14.85	14.85	sp|P09497|CLCB_HUMAN	Clathrin light chain B OS=Homo sapiens GN=CLTB PE=1 SV=1	HUMAN	5	0.864402	0.474643	0.230732	2.05052	0.421552	1.77248	0.84322	0.46151	0.228421	2.25221	0.374396	1.89911
334	6.81	6.85	23.38	14.93	13.24	sp|P27169|PON1_HUMAN	Serum paraoxonase/arylesterase 1 OS=Homo sapiens GN=PON1 PE=1 SV=3	HUMAN	4	0.222178	0.00682125	0.0119685	2.04583	0.1086	0.454538	0.14897	0.013791	0.0209114	3.20356	0.0465016	0.477235
335	6.79	6.8	40.77	22.31	22.31	sp|P35542|SAA4_HUMAN	Serum amyloid A-4 protein OS=Homo sapiens GN=SAA4 PE=1 SV=2	HUMAN	4	0.248274	0.000369231	0.0012597	1.27792	0.194279	0.317275	0.304195	0.00878789	0.0149217	1.85749	0.163766	0.56504
336	6.78	6.78	28.62	20.62	14.77	sp|P18065|IBP2_HUMAN	Insulin-like growth factor-binding protein 2 OS=Homo sapiens GN=IGFBP2 PE=1 SV=2	HUMAN	5	1.1888	0.570921	0.258115	2.17875	0.545636	2.5901	1.08035	0.706351	0.296446	1.69902	0.63587	1.83554
337	6.67	6.67	25.49	14.9	14.9	sp|P08311|CATG_HUMAN	Cathepsin G OS=Homo sapiens GN=CTSG PE=1 SV=2	HUMAN	6	1.59392	0.0850094	0.078814	1.79508	0.887935	2.86121	1.49636	0.0105954	0.0171211	1.25125	1.19589	1.87232
338	6.64	6.86	27.54	17.39	13.41	tr|J3KPA1|J3KPA1_HUMAN	Cysteine-rich secretory protein 3 OS=Homo sapiens GN=CRISP3 PE=4 SV=1	HUMAN	4	2.17322	0.00643093	0.0118405	1.51112	1.43815	3.284	3.87044	0.0136838	0.0208985	2.44557	1.58263	9.46545
340	6.5	6.52	51.43	40.95	40.95	sp|P31949|S10AB_HUMAN	Protein S100-A11 OS=Homo sapiens GN=S100A11 PE=1 SV=2	HUMAN	7	1.99495	0.0238936	0.0324868	1.74057	1.14615	3.47236	1.39107	0.135155	0.106615	1.61073	0.863624	2.24064
342	6.45	6.6	22.6	12.12	9.584	sp|Q6P4A8|PLBL1_HUMAN	Phospholipase B-like 1 OS=Homo sapiens GN=PLBD1 PE=1 SV=2	HUMAN	6	0.971763	0.926097	0.347143	2.47082	0.393296	2.40105	3.56364	0.11633	0.0983875	6.34071	0.562026	22.596
344	6.36	6.36	19.88	19.88	19.88	sp|P10153|RNAS2_HUMAN	Non-secretory ribonuclease OS=Homo sapiens GN=RNASE2 PE=1 SV=2	HUMAN	4	0.525678	0.488384	0.234007	2638.43	0.000199239	1386.96	0.664555	0.533915	0.247146	322.808	0.00205867	214.524
345	6.28	7.71	33.53	17.37	17.37	sp|P07195|LDHB_HUMAN	L-lactate dehydrogenase B chain OS=Homo sapiens GN=LDHB PE=1 SV=2	HUMAN	7	1.1574	0.342623	0.19365	1.51224	0.765352	1.75026	1.35349	0.448948	0.226011	3.03062	0.446604	4.1019
346	6.21	6.21	32.21	32.21	28.19	sp|Q15828|CYTM_HUMAN	Cystatin-M OS=Homo sapiens GN=CST6 PE=1 SV=1	HUMAN	3	0.967605	0.813323	0.319462	1.50181	0.644292	1.45316	0.728057	0.111739	0.0955256	1.57202	0.463134	1.14452
347	6.19	6.44	23.35	12.18	10.78	sp|P00352|AL1A1_HUMAN	Retinal dehydrogenase 1 OS=Homo sapiens GN=ALDH1A1 PE=1 SV=2	HUMAN	4	0.858727	0.370108	0.201662	3.56671	0.240762	3.06283	1.04448	0.827497	0.322031	7.31845	0.142718	7.64396
348	6.16	6.23	13.28	8.918	7.4	sp|P43121-2|MUC18_HUMAN	Isoform 2 of Cell surface glycoprotein MUC18 OS=Homo sapiens GN=MCAM	HUMAN	4	0.60296	0.00568165	0.0110183	1.25334	0.481082	0.755715	1.10738	0.830816	0.322573	4.02868	0.274874	4.46127
349	6.12	6.12	39.25	35.51	29.91	sp|P09341|GROA_HUMAN	Growth-regulated alpha protein OS=Homo sapiens GN=CXCL1 PE=1 SV=1	HUMAN	3	2.57715	0.10831	0.093681	4.31542	0.597195	11.1215	2.00226	0.0349443	0.0420055	1.77465	1.12825	3.5533
350	6.1	6.13	32.81	29.69	25	sp|P13987|CD59_HUMAN	CD59 glycoprotein OS=Homo sapiens GN=CD59 PE=1 SV=1	HUMAN	3	0.6467	0.245713	0.157637	3.17202	0.203876	2.05135	0.783766	0.712355	0.297931	11.8027	0.0664054	9.25059
351	6.08	23.91	65.32	58.47	52.42	tr|H7BYY1|H7BYY1_HUMAN	Tropomyosin 1 (Alpha), isoform CRA_m OS=Homo sapiens GN=TPM1 PE=3 SV=1	HUMAN	20	1.29419	0.0879151	0.0801819	1.42294	0.909521	1.84155	1.25553	0.255322	0.160541	1.85997	0.675028	2.33524
352	6.08	6.53	10.68	3.621	2.414	sp|P46940|IQGA1_HUMAN	Ras GTPase-activating-like protein IQGAP1 OS=Homo sapiens GN=IQGAP1 PE=1 SV=1	HUMAN	3	0.731123	0.118477	0.0985008	1.55045	0.471556	1.13357	0.785933	0.252294	0.160002	1.64917	0.476564	1.29613
354	6.04	6.87	20.17	8.034	4.786	sp|Q9UH65|SWP70_HUMAN	Switch-associated protein 70 OS=Homo sapiens GN=SWAP70 PE=1 SV=1	HUMAN	3	0.96291	0.926121	0.347143	61.5337	0.0156485	59.2514	1.68299	0.618402	0.272884	16001	0.00010518	26929.5
355	6.04	6.35	17.37	7.32	5.087	sp|P55072|TERA_HUMAN	Transitional endoplasmic reticulum ATPase OS=Homo sapiens GN=VCP PE=1 SV=4	HUMAN	4	1.4169	0.669407	0.287808	2311.64	0.00061294	3275.36	0.984678	0.906157	0.342447	3.74807	0.262716	3.69064
356	6.04	6.12	50	44.32	38.64	tr|Q5T123|Q5T123_HUMAN	SH3 domain binding glutamic acid-rich protein like 3 OS=Homo sapiens GN=SH3BGRL3 PE=2 SV=1	HUMAN	5	2.36105	0.00629681	0.0117179	1.4881	1.58663	3.51347	2.71792	0.00139933	0.00376352	1.31765	2.06271	3.58126
357	6.04	6.04	36.63	26.73	26.73	tr|C9JFR7|C9JFR7_HUMAN	Cytochrome c (Fragment) OS=Homo sapiens GN=CYCS PE=3 SV=1	HUMAN	3	0.868771	0.125823	0.101893	1.22427	0.709623	1.06361	0.556215	0.00132522	0.0035904	1.22581	0.453753	0.681815
358	6.02	6.07	24.04	15.38	15.38	sp|Q96DA0|ZG16B_HUMAN	Zymogen granule protein 16 homolog B OS=Homo sapiens GN=ZG16B PE=1 SV=3	HUMAN	3	0.575317	0.557471	0.254603	14.4842	0.0397204	8.33299	1.22779	0.79632	0.31554	10.1357	0.121135	12.4445
360	6.01	6.11	16.72	11.55	8.207	sp|O00151|PDLI1_HUMAN	PDZ and LIM domain protein 1 OS=Homo sapiens GN=PDLIM1 PE=1 SV=4	HUMAN	3	1.19006	0.337157	0.192605	1.81856	0.654393	2.16419	1.18924	0.259416	0.162365	1.61361	0.737005	1.91897
361	6	6.07	18.84	8.904	8.904	sp|Q07955-2|SRSF1_HUMAN	Isoform ASF-2 of Serine/arginine-rich splicing factor 1 OS=Homo sapiens GN=SRSF1	HUMAN	3	1.09844	0.525465	0.245392	1.69875	0.646613	1.86597	1.10934	0.333944	0.191858	1.42417	0.778942	1.57989
362	6	6.06	12.99	9.091	9.091	sp|P16083|NQO2_HUMAN	Ribosyldihydronicotinamide dehydrogenase [quinone] OS=Homo sapiens GN=NQO2 PE=1 SV=5	HUMAN	3	1.14309	0.439777	0.222891	1.82515	0.6263	2.08631	0.974584	0.788384	0.315066	1.43589	0.678732	1.39939
363	6	6.04	18.26	6.369	6.369	sp|P23381|SYWC_HUMAN	Tryptophan--tRNA ligase, cytoplasmic OS=Homo sapiens GN=WARS PE=1 SV=2	HUMAN	3	1.14763	0.395607	0.212063	1.73722	0.660616	1.99368	2.31523	0.0094765	0.0157997	1.42501	1.62471	3.29924
364	6	6.01	16.79	9.16	9.16	sp|Q99536|VAT1_HUMAN	Synaptic vesicle membrane protein VAT-1 homolog OS=Homo sapiens GN=VAT1 PE=1 SV=2	HUMAN	3	0.753325	0.485629	0.233282	31.1918	0.0241513	23.4976	1.24522	0.602057	0.267594	47.5377	0.0261943	59.1947
365	6	6	20	18.33	18.33	sp|P24592|IBP6_HUMAN	Insulin-like growth factor-binding protein 6 OS=Homo sapiens GN=IGFBP6 PE=1 SV=1	HUMAN	3	0.757765	0.324303	0.188361	7.1614	0.105812	5.42666	0.392306	0.20052	0.140304	48.1227	0.0081522	18.8788
366	6	6	58.33	58.33	58.33	sp|P30047|GFRP_HUMAN	GTP cyclohydrolase 1 feedback regulatory protein OS=Homo sapiens GN=GCHFR PE=1 SV=3	HUMAN	3	0.803329	0.773825	0.313843	1807.39	0.00044447	1451.92	1.62271	0.449674	0.226011	190.175	0.00853273	308.598
367	5.91	6.09	17.28	12.31	9.287	sp|P53634|CATC_HUMAN	Dipeptidyl peptidase 1 OS=Homo sapiens GN=CTSC PE=1 SV=2	HUMAN	4	1.46003	0.175913	0.129118	1.89608	0.770026	2.76834	1.51952	0.126589	0.102233	1.82843	0.83105	2.77833
368	5.87	6.44	10.7	5.631	4.167	tr|E9PHP7|E9PHP7_HUMAN	Ectonucleotide pyrophosphatase/phosphodiesterase family member 2 OS=Homo sapiens GN=ENPP2 PE=4 SV=1	HUMAN	3	1.38336	0.467329	0.22934	3.46892	0.398788	4.79878	1.03951	0.851979	0.328371	1.83447	0.566654	1.90694
369	5.83	5.97	20.59	8.377	7.155	sp|P10809|CH60_HUMAN	60 kDa heat shock protein, mitochondrial OS=Homo sapiens GN=HSPD1 PE=1 SV=2	HUMAN	4	1.09019	0.663846	0.286493	1.77185	0.615282	1.93164	1.22497	0.347957	0.194847	1.78902	0.684713	2.1915
370	5.78	5.86	24.29	17.14	13.33	tr|Q5T9B7|Q5T9B7_HUMAN	Adenylate kinase OS=Homo sapiens GN=AK1 PE=2 SV=1	HUMAN	3	1.56124	0.140254	0.109257	3.5523	0.439502	5.546	1.14593	0.402366	0.213011	3.55129	0.322679	4.06952
371	5.75	7.13	27.19	22.36	14.5	sp|Q9Y266|NUDC_HUMAN	Nuclear migration protein nudC OS=Homo sapiens GN=NUDC PE=1 SV=1	HUMAN	5	1.37175	0.04965	0.0541248	1.37045	1.00095	1.87991	1.02149	0.927277	0.347223	1.97845	0.516308	2.02096
372	5.66	5.74	42.12	24.66	23.29	tr|Q32Q12|Q32Q12_HUMAN	Nucleoside diphosphate kinase OS=Homo sapiens GN=NME1-NME2 PE=2 SV=1	HUMAN	3	1.46002	0.0732179	0.0717503	1.55972	0.936078	2.27722	0.752748	0.156937	0.118389	1.61789	0.465264	1.21787
373	5.65	5.65	17.23	15.38	9.538	sp|Q96CX2|KCD12_HUMAN	BTB/POZ domain-containing protein KCTD12 OS=Homo sapiens GN=KCTD12 PE=1 SV=1	HUMAN	4	1.19977	0.533018	0.247146	2.28208	0.525737	2.73798	1.13228	0.545453	0.251088	1.78889	0.632949	2.02552
374	5.62	5.66	13.51	9.309	9.309	sp|P07711|CATL1_HUMAN	Cathepsin L1 OS=Homo sapiens GN=CTSL1 PE=1 SV=2	HUMAN	3	0.847824	0.226761	0.151091	1.41409	0.599556	1.19889	1.53841	0.117766	0.0984649	1.87729	0.819485	2.88803
376	5.55	5.55	19.44	14.68	14.68	tr|G3V5Z7|G3V5Z7_HUMAN	Proteasome subunit alpha type OS=Homo sapiens GN=PSMA6 PE=3 SV=1	HUMAN	3	1.03527	0.911011	0.343225	22.8689	0.0452695	23.6754	0.987788	0.978585	0.357814	103.456	0.00954787	102.193
377	5.51	5.53	12.43	7.961	6.796	sp|P11413|G6PD_HUMAN	Glucose-6-phosphate 1-dehydrogenase OS=Homo sapiens GN=G6PD PE=1 SV=4	HUMAN	3	1.19311	0.395966	0.212063	1.76583	0.675666	2.10684	1.85572	0.149378	0.114667	2.77351	0.669088	5.14685
378	5.5	5.56	16.46	10.25	8.075	sp|P05089|ARGI1_HUMAN	Arginase-1 OS=Homo sapiens GN=ARG1 PE=1 SV=2	HUMAN	4	0.891158	0.452375	0.226011	3.52538	0.252783	3.14167	0.902255	0.569266	0.257938	5.09088	0.17723	4.59327
380	5.42	5.65	27.78	15.61	14.29	sp|Q16543|CDC37_HUMAN	Hsp90 co-chaperone Cdc37 OS=Homo sapiens GN=CDC37 PE=1 SV=1	HUMAN	4	2.07155	0.129801	0.103792	2.89344	0.715947	5.99389	2.41865	0.110043	0.0945146	3.31231	0.7302	8.01133
382	5.31	5.41	13.66	8.729	7.211	sp|O60506-4|HNRPQ_HUMAN	Isoform 4 of Heterogeneous nuclear ribonucleoprotein Q OS=Homo sapiens GN=SYNCRIP	HUMAN	3	0.798978	0.469725	0.229849	2.37575	0.336306	1.89817	0.894268	0.772661	0.313843	3.08028	0.290321	2.75459
383	5.19	5.38	46.57	13.73	10.78	tr|B4DUI3|B4DUI3_HUMAN	Eukaryotic translation initiation factor 3 subunit J OS=Homo sapiens GN=EIF3J PE=2 SV=1	HUMAN	3	1.32939	0.0761816	0.0734461	1.43189	0.928412	1.90354	1.71486	0.0480279	0.0528255	1.69521	1.0116	2.90704
385	5.07	5.14	25.98	20.47	11.81	tr|D6RHI9|D6RHI9_HUMAN	Ribonuclease T2 (Fragment) OS=Homo sapiens GN=RNASET2 PE=3 SV=1	HUMAN	3	0.872734	0.680353	0.289809	2.59365	0.336489	2.26356	1.554	0.380819	0.206235	3.92984	0.395436	6.10697
386	5.05	5.08	22.35	11.73	11.73	tr|F5H7Y6|F5H7Y6_HUMAN	Ras-related protein Rap-1b OS=Homo sapiens GN=RAP1B PE=4 SV=1	HUMAN	3	0.960997	0.829916	0.322567	6.33977	0.151582	6.0925	1.45006	0.486237	0.233282	91.9936	0.0157626	133.396
388	4.99	5.06	11.31	7.407	5.068	tr|B3KUE5|B3KUE5_HUMAN	Phospholipid transfer protein OS=Homo sapiens GN=PLTP PE=2 SV=1	HUMAN	2	1.38206	0.363119	0.199101	13.978	0.0988743	19.3184	0.818892	0.338784	0.192936	4.45861	0.183665	3.65112
389	4.97	5.01	7.152	4.727	1.939	sp|Q00839|HNRPU_HUMAN	Heterogeneous nuclear ribonucleoprotein U OS=Homo sapiens GN=HNRNPU PE=1 SV=6	HUMAN	2	1.28306	0.134682	0.106615	1.44747	0.886415	1.85719	1.4349	0.0766703	0.0735682	1.52597	0.940318	2.18962
390	4.94	5.01	27.72	13.73	10.36	tr|B7ZKW8|B7ZKW8_HUMAN	CapZ-interacting protein OS=Homo sapiens GN=RCSD1 PE=2 SV=1	HUMAN	4	1.15439	0.253377	0.160137	1.3827	0.834878	1.59618	1.57869	0.0689263	0.068271	1.68609	0.936304	2.66182
391	4.91	4.97	10.5	7.16	7.16	sp|P16930|FAAA_HUMAN	Fumarylacetoacetase OS=Homo sapiens GN=FAH PE=1 SV=2	HUMAN	3	1.46159	0.327095	0.18911	15.2029	0.0961389	22.2205	1.38766	0.492693	0.235465	58.4516	0.0237402	81.1107
392	4.91	4.92	12.85	9.431	4.228	sp|P00748|FA12_HUMAN	Coagulation factor XII OS=Homo sapiens GN=F12 PE=1 SV=3	HUMAN	2	0.361843	0.00783745	0.0134317	1.77122	0.20429	0.640903	0.337207	0.0746907	0.0728063	3.52378	0.0956948	1.18824
393	4.88	4.89	15.32	11.69	11.69	sp|P11226|MBL2_HUMAN	Mannose-binding protein C OS=Homo sapiens GN=MBL2 PE=1 SV=2	HUMAN	3	0.546031	0.282288	0.173358	38.535	0.0141697	21.0413	0.683834	0.2332	0.153439	6.37538	0.107262	4.3597
394	4.88	4.88	14.52	9.241	9.241	tr|B7Z5W1|B7Z5W1_HUMAN	Junctional adhesion molecule A OS=Homo sapiens GN=F11R PE=2 SV=1	HUMAN	3	1.0354	0.854453	0.328981	6.6824	0.154944	6.91895	1.07545	0.845577	0.326324	41.8961	0.0256695	45.0572
395	4.87	5.9	20.21	20.21	17.73	sp|Q9UBX7|KLK11_HUMAN	Kallikrein-11 OS=Homo sapiens GN=KLK11 PE=1 SV=2	HUMAN	7	3.34267	0.00497581	0.0100186	1.44436	2.31429	4.82801	4.65991	0.0350759	0.0420055	3.57522	1.30339	16.6602
396	4.84	7.9	56.94	38.28	20.57	sp|P26583|HMGB2_HUMAN	High mobility group protein B2 OS=Homo sapiens GN=HMGB2 PE=1 SV=2	HUMAN	4	1.33555	0.19372	0.137003	1.67331	0.798148	2.23479	1.4919	0.0561104	0.0589021	1.51702	0.983441	2.26324
397	4.84	5.67	31.56	17.78	15.11	sp|P24534|EF1B_HUMAN	Elongation factor 1-beta OS=Homo sapiens GN=EEF1B2 PE=1 SV=3	HUMAN	4	1.29752	0.20578	0.142792	1.61463	0.803598	2.09501	1.23492	0.0379899	0.0448104	1.21165	1.0192	1.49628
398	4.79	4.91	23.46	18.46	13.85	sp|P00918|CAH2_HUMAN	Carbonic anhydrase 2 OS=Homo sapiens GN=CA2 PE=1 SV=2	HUMAN	3	0.630101	0.135416	0.106615	3.55193	0.177397	2.23807	0.936642	0.632754	0.27624	3.58982	0.260916	3.36238
399	4.71	4.71	14.5	6.397	6.397	sp|P27918|PROP_HUMAN	Properdin OS=Homo sapiens GN=CFP PE=1 SV=2	HUMAN	3	0.743104	0.207905	0.143187	3.58878	0.207063	2.66684	0.724991	0.324691	0.188361	9.83328	0.0737283	7.12904
400	4.68	4.84	8.602	2.542	2.542	tr|F5H3A1|F5H3A1_HUMAN	Sodium/potassium-transporting ATPase subunit alpha-1 OS=Homo sapiens GN=ATP1A1 PE=3 SV=1	HUMAN	3	0.692118	0.478594	0.232085	6.24922	0.110753	4.32519	1.48458	0.195507	0.13782	2.42938	0.611094	3.60662
402	4.66	4.75	36.2	22.09	22.09	tr|B4DPJ6|B4DPJ6_HUMAN	Tumor protein D54 OS=Homo sapiens GN=TPD52L2 PE=2 SV=1	HUMAN	3	0.661703	0.628792	0.275271	11.5739	0.0571721	7.65847	0.698237	0.0328258	0.0404519	1.35493	0.515331	0.946061
403	4.66	4.66	12.45	12.45	7.004	sp|P15328|FOLR1_HUMAN	Folate receptor alpha OS=Homo sapiens GN=FOLR1 PE=1 SV=3	HUMAN	3	2.82319	0.214453	0.14598	101.317	0.0278648	286.037	2.16968	0.14133	0.109631	9.22124	0.235292	20.0072
404	4.63	19.02	58.9	51.6	41.55	sp|P10412|H14_HUMAN	Histone H1.4 OS=Homo sapiens GN=HIST1H1E PE=1 SV=2	HUMAN	17	1.453	0.166455	0.122911	2.12434	0.683976	3.08666	2.22844	0.116428	0.0983875	3.64079	0.612075	8.11328
405	4.62	4.69	14.05	10.13	10.13	sp|Q9H098-2|F107B_HUMAN	Isoform 2 of Protein FAM107B OS=Homo sapiens GN=FAM107B	HUMAN	4	1.44783	0.35627	0.1977	19.0205	0.0761195	27.5384	2.10823	0.0888447	0.0806305	3.78559	0.55691	7.98092
406	4.62	4.63	12.03	10.6	10.6	sp|P31997|CEAM8_HUMAN	Carcinoembryonic antigen-related cell adhesion molecule 8 OS=Homo sapiens GN=CEACAM8 PE=1 SV=2	HUMAN	4	1.39121	0.285771	0.17462	7.54416	0.18441	10.4955	1.85723	0.101593	0.0891268	3.54684	0.523631	6.58731
407	4.61	4.74	24.75	9.571	7.591	tr|B4DTC3|B4DTC3_HUMAN	Heterogeneous nuclear ribonucleoprotein D0 OS=Homo sapiens GN=HNRNPD PE=2 SV=1	HUMAN	2	2.35352	0.425481	0.2184	5359.79	0.000439108	12614.4	1.87433	0.210469	0.144116	15.4811	0.121072	29.0167
408	4.59	4.63	13.35	8.686	4.237	tr|H3BVD9|H3BVD9_HUMAN	Kunitz-type protease inhibitor 1 (Fragment) OS=Homo sapiens GN=SPINT1 PE=4 SV=1	HUMAN	2	1.08329	0.673877	0.288384	2.025	0.534955	2.19366	0.862486	0.47466	0.230732	2.07314	0.416029	1.78805
409	4.57	4.57	12.96	12.96	11.42	sp|P67809|YBOX1_HUMAN	Nuclease-sensitive element-binding protein 1 OS=Homo sapiens GN=YBX1 PE=1 SV=3	HUMAN	4	0.66395	0.591599	0.264542	1061.12	0.000625707	704.53	1.39262	0.598399	0.266935	317.781	0.00438232	442.548
410	4.55	5.21	66.36	43.64	33.64	sp|P81605|DCD_HUMAN	Dermcidin OS=Homo sapiens GN=DCD PE=1 SV=2	HUMAN	3	0.42415	0.0760572	0.0734461	3.69937	0.114655	1.56909	0.43214	0.0777558	0.074416	3.70084	0.116768	1.59928
411	4.54	4.82	14.83	7.815	7.337	tr|B4DGP8|B4DGP8_HUMAN	Calnexin OS=Homo sapiens GN=CANX PE=2 SV=1	HUMAN	4	1.74934	0.304261	0.181995	5.79358	0.301944	10.1349	3.90183	0.0812347	0.0771444	5.9302	0.65796	23.1387
412	4.53	6.66	82.54	73.02	60.32	tr|C9J0E4|C9J0E4_HUMAN	Cystatin-A OS=Homo sapiens GN=CSTA PE=4 SV=1	HUMAN	4	1.92887	0.0475889	0.0526255	1.89596	1.01736	3.65705	0.960227	0.798135	0.31554	1.82056	0.527434	1.74815
413	4.49	4.7	25.85	17.35	8.503	sp|P06748|NPM_HUMAN	Nucleophosmin OS=Homo sapiens GN=NPM1 PE=1 SV=2	HUMAN	5	1.15076	0.247635	0.157637	1.45367	0.791622	1.67282	1.26628	0.209579	0.143803	1.74488	0.72571	2.2095
414	4.47	4.51	33.33	25	19.44	sp|P62942|FKB1A_HUMAN	Peptidyl-prolyl cis-trans isomerase FKBP1A OS=Homo sapiens GN=FKBP1A PE=1 SV=2	HUMAN	2	1.55305	0.438506	0.222553	100.007	0.0155295	155.315	1.44445	0.283235	0.173358	9.27881	0.155672	13.4028
415	4.46	4.46	20.47	17.21	17.21	tr|C9JF17|C9JF17_HUMAN	Apolipoprotein D (Fragment) OS=Homo sapiens GN=APOD PE=4 SV=1	HUMAN	3	0.262104	0.047228	0.0524151	3.54125	0.0740145	0.928175	0.391148	0.0997135	0.0878335	6.57654	0.0594762	2.5724
417	4.4	4.51	35.84	19.65	15.03	tr|J3KNB4|J3KNB4_HUMAN	Antibacterial protein LL-37 OS=Homo sapiens GN=CAMP PE=4 SV=1	HUMAN	3	1.11904	0.693909	0.29254	2.28299	0.490164	2.55475	1.48494	0.157524	0.118389	1.95639	0.759023	2.90512
418	4.38	4.41	35.08	18.85	18.85	sp|P60953|CDC42_HUMAN	Cell division control protein 42 homolog OS=Homo sapiens GN=CDC42 PE=1 SV=2	HUMAN	4	1.55118	0.260794	0.162869	3.37706	0.459327	5.23842	3.38054	0.201465	0.140326	16.3416	0.206867	55.2436
419	4.34	4.38	13.81	5.959	4.07	sp|P09871|C1S_HUMAN	Complement C1s subcomponent OS=Homo sapiens GN=C1S PE=1 SV=1	HUMAN	3	0.771051	0.0665708	0.0662943	1.33428	0.57788	1.02879	0.823104	0.596788	0.266539	2.56437	0.320977	2.11074
420	4.3	6.62	34.38	25.35	11.46	sp|P27105|STOM_HUMAN	Erythrocyte band 7 integral membrane protein OS=Homo sapiens GN=STOM PE=1 SV=3	HUMAN	5	1.07243	0.874787	0.334017	86.3825	0.0124149	92.6389	2.04261	0.407893	0.21448	868.556	0.00235173	1774.12
421	4.28	4.3	29.13	23.48	16.09	sp|P15941-6|MUC1_HUMAN	Isoform 6 of Mucin-1 OS=Homo sapiens GN=MUC1	HUMAN	3	1.38007	0.411856	0.215253	2.93905	0.469564	4.05609	1.59508	0.301151	0.180428	3.29451	0.484162	5.25501
422	4.26	12.18	39.9	32.32	27.27	sp|P32119|PRDX2_HUMAN	Peroxiredoxin-2 OS=Homo sapiens GN=PRDX2 PE=1 SV=5	HUMAN	9	0.666787	0.0120966	0.0190476	1.26664	0.526423	0.844577	0.577017	0.218842	0.147684	3.09136	0.186655	1.78377
423	4.26	4.38	6.846	2.2	1.32	sp|O00468|AGRIN_HUMAN	Agrin OS=Homo sapiens GN=AGRN PE=1 SV=4	HUMAN	2	0.72259	0.474503	0.230732	4.95594	0.145803	3.58111	0.483197	0.230152	0.151976	6.26308	0.0771501	3.0263
424	4.24	4.33	26.84	15.81	13.6	tr|F2Z2Y4|F2Z2Y4_HUMAN	Pyridoxal kinase OS=Homo sapiens GN=PDXK PE=4 SV=1	HUMAN	3	1.61936	0.16408	0.12189	2.61952	0.61819	4.24195	0.94048	0.808261	0.318178	2.60054	0.361648	2.44576
425	4.22	4.5	8.637	1.601	0.7763	sp|Q9NZM1|MYOF_HUMAN	Myoferlin OS=Homo sapiens GN=MYOF PE=1 SV=1	HUMAN	2	1.25174	0.407327	0.21448	2.53063	0.494639	3.1677	1.29921	0.088254	0.0802922	1.43163	0.907508	1.85999
426	4.22	4.24	24.39	16.59	12.2	sp|Q9Y5Z4|HEBP2_HUMAN	Heme-binding protein 2 OS=Homo sapiens GN=HEBP2 PE=1 SV=1	HUMAN	2	1.1222	0.145745	0.112582	1.19424	0.939673	1.34017	1.00961	0.914246	0.344092	1.26046	0.800981	1.27257
427	4.16	8.49	17.42	6.452	4.355	tr|J9JID7|J9JID7_HUMAN	Lamin B2, isoform CRA_a OS=Homo sapiens GN=LMNB2 PE=3 SV=1	HUMAN	5	1.48498	0.381166	0.206235	4.60502	0.32247	6.83838	1.20747	0.155335	0.118389	1.4384	0.839455	1.73682
428	4.16	4.47	11.37	4.102	2.797	sp|P11047|LAMC1_HUMAN	Laminin subunit gamma-1 OS=Homo sapiens GN=LAMC1 PE=1 SV=3	HUMAN	3	0.91853	0.561738	0.255531	3.71542	0.247221	3.41272	0.574933	0.116169	0.0983875	3.66112	0.157038	2.1049
429	4.16	4.34	25	17.34	12.5	sp|O14818|PSA7_HUMAN	Proteasome subunit alpha type-7 OS=Homo sapiens GN=PSMA7 PE=1 SV=1	HUMAN	3	0.770736	0.392606	0.211184	10.4409	0.0738186	8.04721	1.48616	0.402545	0.213011	39.9772	0.0371753	59.4125
431	4.15	5.73	18.16	10.67	5.243	tr|F5H5M6|F5H5M6_HUMAN	Hyaluronan-binding protein 2 OS=Homo sapiens GN=HABP2 PE=3 SV=1	HUMAN	3	0.417076	0.000141607	0.000586259	1.24133	0.33599	0.517731	0.35889	0.0308018	0.0395507	2.42083	0.148251	0.868812
432	4.15	4.22	28.83	24.77	10.36	sp|P04179|SODM_HUMAN	Superoxide dismutase [Mn], mitochondrial OS=Homo sapiens GN=SOD2 PE=1 SV=2	HUMAN	2	0.631552	0.160491	0.119706	2.47201	0.255481	1.5612	1.04463	0.872673	0.333556	2.81479	0.371121	2.94041
435	4.12	4.24	33.78	23.65	14.86	sp|O60869|EDF1_HUMAN	Endothelial differentiation-related factor 1 OS=Homo sapiens GN=EDF1 PE=1 SV=1	HUMAN	2	1.31954	0.0851318	0.078814	1.45113	0.909323	1.91482	1.17805	0.343766	0.19365	1.77407	0.664039	2.08994
436	4.12	4.12	15.83	13.75	11.25	sp|P08294|SODE_HUMAN	Extracellular superoxide dismutase [Cu-Zn] OS=Homo sapiens GN=SOD3 PE=1 SV=2	HUMAN	2	0.640876	0.580525	0.261285	1480.94	0.000432748	949.101	0.578914	0.334809	0.191858	56.3316	0.0102769	32.6112
438	4.11	4.12	19.7	7.955	7.955	sp|P61247|RS3A_HUMAN	40S ribosomal protein S3a OS=Homo sapiens GN=RPS3A PE=1 SV=2	HUMAN	2	1.14024	0.632327	0.27624	2.74567	0.415288	3.13074	2.09579	0.0959606	0.0852034	2.89938	0.722841	6.07648
439	4.1	10.8	84.09	84.09	77.27	sp|P63313|TYB10_HUMAN	Thymosin beta-10 OS=Homo sapiens GN=TMSB10 PE=1 SV=2	HUMAN	16	3.15851	0.229818	0.151976	248.909	0.0126894	786.182	5.54268	0.180754	0.131105	572.177	0.009687	3171.39
440	4.09	6.17	67.86	41.67	34.52	tr|E9PS38|E9PS38_HUMAN	Protein NEDD8-MDP1 OS=Homo sapiens GN=NEDD8-MDP1 PE=4 SV=1	HUMAN	4	1.77273	0.109605	0.0943588	3.5429	0.50036	6.28061	1.08663	0.779193	0.313843	18.5538	0.0585668	20.1612
441	4.09	4.25	19.06	12.23	11.87	sp|Q9BT09|CNPY3_HUMAN	Protein canopy homolog 3 OS=Homo sapiens GN=CNPY3 PE=1 SV=1	HUMAN	3	1.14402	0.423694	0.218344	3.82673	0.298954	4.37784	2.24617	0.480249	0.232223	15725.7	0.000142835	35322.5
443	4.08	4.27	10.24	4.654	4.654	sp|P15144|AMPN_HUMAN	Aminopeptidase N OS=Homo sapiens GN=ANPEP PE=1 SV=4	HUMAN	3	0.358687	0.479333	0.232085	200386	1.78999e-06	71875.8	0.318466	0.42863	0.219353	108708	2.92956e-06	34619.6
445	4.07	4.29	19.16	7.612	7.612	sp|P49908|SEPP1_HUMAN	Selenoprotein P OS=Homo sapiens GN=SEPP1 PE=1 SV=3	HUMAN	3	0.368955	0.0236008	0.0322075	1.9563	0.188598	0.721789	0.257876	0.00423267	0.00886127	1.46319	0.176243	0.377321
446	4.07	4.21	24.07	7.944	6.542	tr|Q5T6W5|Q5T6W5_HUMAN	Heterogeneous nuclear ribonucleoprotein K OS=Homo sapiens GN=HNRNPK PE=2 SV=1	HUMAN	3	1.8024	0.118279	0.0985008	4.08346	0.44139	7.36	1.13823	0.743017	0.306706	47.0707	0.0241813	53.5774
447	4.07	4.19	20.13	7.468	4.87	tr|E7EX17|E7EX17_HUMAN	Uncharacterized protein OS=Homo sapiens GN=EIF4B PE=4 SV=1	HUMAN	2	0.977933	0.816277	0.319626	1.43801	0.680059	1.40628	1.18623	0.789712	0.315255	11.1984	0.105928	13.2839
449	4.07	4.16	21.62	10.04	10.04	tr|J3KN86|J3KN86_HUMAN	40S ribosomal protein S3 OS=Homo sapiens GN=RPS3 PE=3 SV=1	HUMAN	2	2.2695	0.228685	0.151823	7.82756	0.289937	17.7647	1.14116	0.791148	0.315486	6.56183	0.173908	7.48809
450	4.07	4.14	29.8	16.56	12.58	tr|B1AKZ3|B1AKZ3_HUMAN	Astrocytic phosphoprotein PEA-15 OS=Homo sapiens GN=PEA15 PE=2 SV=1	HUMAN	3	1.12967	0.634297	0.276586	2.08615	0.541509	2.35667	1.19344	0.591274	0.264542	2.55769	0.466609	3.05245
452	4.06	4.15	22.1	10.72	7.877	sp|Q13451|FKBP5_HUMAN	Peptidyl-prolyl cis-trans isomerase FKBP5 OS=Homo sapiens GN=FKBP5 PE=1 SV=2	HUMAN	2	0.61528	0.154342	0.118188	4.60031	0.133747	2.83048	1.04363	0.742029	0.306706	3.54294	0.294566	3.69752
454	4.05	4.22	7.35	2.227	2.227	tr|G5E9M5|G5E9M5_HUMAN	Interleukin enhancer binding factor 3, 90kDa, isoform CRA_b OS=Homo sapiens GN=ILF3 PE=4 SV=1	HUMAN	2	1.24896	0.519819	0.243682	20.2111	0.0617956	25.2428	1.17997	0.342981	0.19365	3.51426	0.335765	4.14671
455	4.05	4.06	11.97	5.882	4.462	sp|Q12805|FBLN3_HUMAN	EGF-containing fibulin-like extracellular matrix protein 1 OS=Homo sapiens GN=EFEMP1 PE=1 SV=2	HUMAN	2	1.06457	0.728352	0.302902	1.963	0.542318	2.08974	0.611849	0.698525	0.29415	113.016	0.00541383	69.1488
456	4.05	4.06	6.977	4.07	4.07	tr|F5H3W1|F5H3W1_HUMAN	Podocalyxin OS=Homo sapiens GN=PODXL PE=4 SV=1	HUMAN	2	1.91561	0.0811329	0.0771444	2.33802	0.819332	4.47874	1.97135	0.165012	0.122202	3.89989	0.505489	7.68805
460	4.03	4.13	8.342	2.925	1.625	sp|O14786|NRP1_HUMAN	Neuropilin-1 OS=Homo sapiens GN=NRP1 PE=1 SV=3	HUMAN	2	0.867326	0.553072	0.253466	2.37949	0.3645	2.0638	0.427794	0.0632738	0.0644035	2.62612	0.1629	1.12344
461	4.03	4.1	17.65	7.721	7.721	sp|P24593|IBP5_HUMAN	Insulin-like growth factor-binding protein 5 OS=Homo sapiens GN=IGFBP5 PE=1 SV=1	HUMAN	3	1.12892	0.715856	0.299055	3.47286	0.325069	3.92058	1.71255	0.334697	0.191858	6.27685	0.272836	10.7494
462	4.02	9.62	18.96	9.514	5.466	sp|P20742|PZP_HUMAN	Pregnancy zone protein OS=Homo sapiens GN=PZP PE=1 SV=4	HUMAN	7	0.503081	0.46744	0.22934	27.7196	0.018149	13.9452	0.800922	0.778122	0.313843	19.46	0.0411572	15.586
464	4.02	4.4	12.23	7.524	2.351	tr|F8W8S0|F8W8S0_HUMAN	Cytoplasmic dynein 1 intermediate chain 2 OS=Homo sapiens GN=DYNC1I2 PE=4 SV=1	HUMAN	2	1.02988	0.921785	0.346575	20.69	0.0497767	21.3083	1.19747	0.693218	0.29254	79.6718	0.01503	95.4043
465	4.02	4.17	18.91	16.81	10.5	tr|F5GX11|F5GX11_HUMAN	Proteasome subunit alpha type-1 OS=Homo sapiens GN=PSMA1 PE=4 SV=1	HUMAN	2	1.15266	0.398625	0.212608	3.68993	0.31238	4.25325	1.9789	0.298075	0.180049	80.3032	0.0246428	158.912
466	4.02	4.1	19.06	10.25	5.123	tr|B5MCQ5|B5MCQ5_HUMAN	Protein disulfide-isomerase A6 OS=Homo sapiens GN=PDIA6 PE=3 SV=1	HUMAN	2	1.29167	0.539254	0.249264	39.6412	0.032584	51.2033	1.27852	0.379965	0.20619	8.34268	0.15325	10.6663
467	4.01	5.21	19.35	9.677	9.677	sp|P09496|CLCA_HUMAN	Clathrin light chain A OS=Homo sapiens GN=CLTA PE=1 SV=1	HUMAN	4	0.862741	0.485846	0.233282	6.0153	0.143425	5.18964	1.06746	0.673511	0.288384	4.36286	0.244671	4.65719
468	4.01	4.27	21.26	6.934	3.236	sp|A0MZ66-3|SHOT1_HUMAN	Isoform 3 of Shootin-1 OS=Homo sapiens GN=KIAA1598	HUMAN	2	1.16366	0.146659	0.112815	1.28103	0.908372	1.49068	1.2014	0.2286	0.151823	1.47271	0.815779	1.76931
469	4.01	4.1	23.69	12.05	12.05	sp|Q06323|PSME1_HUMAN	Proteasome activator complex subunit 1 OS=Homo sapiens GN=PSME1 PE=1 SV=1	HUMAN	6	1.10146	0.845781	0.326324	143.881	0.00765532	158.479	1.47848	0.658751	0.285224	4287.31	0.000344851	6338.73
470	4.01	4.07	29.41	29.41	23.53	sp|P20962|PTMS_HUMAN	Parathymosin OS=Homo sapiens GN=PTMS PE=1 SV=2	HUMAN	2	0.759714	0.261547	0.163064	4.5773	0.165974	3.47744	1.10598	0.557962	0.254603	4.65092	0.237798	5.14381
473	4	4.2	8.175	2.912	2.24	sp|Q14764|MVP_HUMAN	Major vault protein OS=Homo sapiens GN=MVP PE=1 SV=4	HUMAN	2	1.38341	0.509699	0.241395	70.2006	0.0197065	97.1162	1.73639	0.122875	0.100873	3.93658	0.44109	6.83544
474	4	4.13	15.67	8.955	8.955	tr|Q5VXV2|Q5VXV2_HUMAN	Protein SET OS=Homo sapiens GN=SET PE=2 SV=2	HUMAN	2	1.0332	0.801963	0.316714	3.63596	0.284163	3.75669	0.739337	0.202446	0.140743	3.53642	0.209064	2.6146
475	4	4.08	12.39	7.606	7.606	tr|B7Z1Z5|B7Z1Z5_HUMAN	Neurotrimin OS=Homo sapiens GN=NTM PE=2 SV=1	HUMAN	2	1.5243	0.743325	0.306706	283938	5.36842e-06	432805	0.976506	0.869069	0.3335	4.25468	0.229513	4.15472
476	4	4.06	14.12	4.706	4.706	sp|P29350|PTN6_HUMAN	Tyrosine-protein phosphatase non-receptor type 6 OS=Homo sapiens GN=PTPN6 PE=1 SV=1	HUMAN	2	0.779165	0.804817	0.317161	22364	3.48401e-05	17425.2	1.91395	0.455373	0.227048	1294.69	0.00147831	2477.98
[truncated: 95 more rows]
